# Supplementary material for: Emergence of novel cephalopod gene regulation and expression through large-scale genome reorganization
Source: PubMed Central journal article supplement (PMC9023564; doi:10.1038/s41467-022-29694-7), 2022-04-21
Supplement: 41467_2022_29694_MOESM3_ESM.pdf [file 41467_2022_29694_MOESM3_ESM.pdf]

### **Descriptions of additional Supplementary data files**

Supplementary Data 1: Detected microsyntenic blocks at cephalopod and metazoan nodes. PFAM annotation for Euprymna genes is provided in the last column.

Supplementary Data 2: Motif prediction and annotation in ATACSeq regions with  $p \leq 0.001$
