# Supplementary material for: Emergence of novel cephalopod gene regulation and expression through large-scale genome reorganization
Source: Nat Commun. 2022 Apr 21;13:2172. doi: 10.1038/s41467-022-29694-7 (PMC9023564; doi:10.1038/s41467-022-29694-7)
Supplement: Supplementary file 4 — Supplementary Dataset 1 [file 41467_2022_29694_MOESM4_ESM.xlsx]

## Sheet: Cephalopod
ID	Species	Connecting IDs	All species in network	Location	Length, bp	Genes	Annotation
3404	CALMI	4360(EUPSC),3403(OCTBI)	CALMI,OCTBI,EUPSC	oct001756F:17296..70813	53517	CALMI_Omin004532p,CALMI_Omin004530p,CALMI_Omin004531p,CALMI_Omin004533p
3225	OCTBI	3224(CALMI)	OCTBI,CALMI	KQ423338:206692..234375	27683	OCTBI_Ocbimv22038434m.p,OCTBI_Ocbimv22038435m.p,OCTBI_Ocbimv22038436m.p
3924	OCTBI	3923(CALMI)	OCTBI,CALMI	KQ425779:22179..180305	158126	OCTBI_Ocbimv22005993m.p,OCTBI_Ocbimv22005994m.p,OCTBI_Ocbimv22005996m.p,OCTBI_Ocbimv22005997m.p
2741	OCTBI	6849(EUPSC)	OCTBI,EUPSC	KQ419887:58055..988620	930565	OCTBI_Ocbimv22025700m.p,OCTBI_Ocbimv22025701m.p,OCTBI_Ocbimv22025703m.p,OCTBI_Ocbimv22025695m.p,OCTBI_Ocbimv22025698m.p,OCTBI_Ocbimv22025704m.p,OCTBI_Ocbimv22025705m.p,OCTBI_Ocbimv22025710m.p,OCTBI_Ocbimv22025711m.p,OCTBI_Ocbimv22025712m.p
4232	EUPSC	4231(CALMI),14528(OCTBI)	EUPSC,OCTBI,CALMI	Lachesis_group28__49_contigs__length_91470296:19493697..20298598	804901	EUPSC_cluster_6301,EUPSC_cluster_3940,EUPSC_cluster_25925,EUPSC_cluster_25926,EUPSC_cluster_7430,EUPSC_cluster_25924,EUPSC_cluster_3347	PF01139 tRNA-splicing ligase RtcB; PF16512 p190-A and -B Rho GAPs FF domain-PF00620 RhoGAP domain-PF00071 Ras family; PF02214 BTB/POZ domain; ; PF00008 EGF-like domain-PF00008 EGF-like domain-PF00008 EGF-like domain-PF00008 EGF-like domain-PF00008 EGF-like domain-PF00002 7 transmembrane receptor (Secretin family)-PF12661 Human growth factor-like EGF; PF03901 Alg9-like mannosyltransferase family; …
2737	CALMI	2736(OCTBI)	CALMI,OCTBI	oct002143F:4441..291436	286995	CALMI_Omin005068p,CALMI_Omin005063p,CALMI_Omin005065p,CALMI_Omin005066p,CALMI_Omin005064p,CALMI_Omin005070p,CALMI_Omin005069p
3891	CALMI	3892(OCTBI)	OCTBI,CALMI	oct002388F:143435..304830	161395	CALMI_Omin004314p,CALMI_Omin004318p,CALMI_Omin004319p,CALMI_Omin004316p
3565	OCTBI	14368(EUPSC)	OCTBI,EUPSC	KQ422015:248750..772520	523770	OCTBI_Ocbimv22034275m.p,OCTBI_Ocbimv22034279m.p,OCTBI_Ocbimv22034280m.p,OCTBI_Ocbimv22034281m.p,OCTBI_Ocbimv22034264m.p,OCTBI_Ocbimv22034268m.p,OCTBI_Ocbimv22034269m.p,OCTBI_Ocbimv22034271m.p,OCTBI_Ocbimv22034272m.p
2873	OCTBI	2874(CALMI)	CALMI,OCTBI	KQ424659:136536..173919	37383	OCTBI_Ocbimv22002448m.p,OCTBI_Ocbimv22002449m.p,OCTBI_Ocbimv22002450m.p
3539	CALMI	3538(OCTBI)	OCTBI,CALMI	oct001283F:3402..290573	287171	CALMI_Omin006123p,CALMI_Omin006122p,CALMI_Omin006121p
3670	CALMI	4486(EUPSC),3669(OCTBI)	OCTBI,CALMI,EUPSC	oct002753F:16200..167144	150944	CALMI_Omin004875p,CALMI_Omin004876p,CALMI_Omin004873p,CALMI_Omin004877p,CALMI_Omin004879p
3732	CALMI	3733(OCTBI)	CALMI,OCTBI	oct011285F:29450..90741	61291	CALMI_Omin027490p,CALMI_Omin027491p,CALMI_Omin027489p,CALMI_Omin027492p
4391	CALMI	4299(EUPSC)	EUPSC,CALMI	oct016247F:1423..58551	57128	CALMI_Omin018491p,CALMI_Omin018492p,CALMI_Omin018490p,CALMI_Omin018489p,CALMI_Omin018488p,CALMI_Omin018487p
4441	EUPSC	3427(CALMI)	EUPSC,OCTBI,CALMI	Lachesis_group6__62_contigs__length_156955521:23983564..24077720	94156	EUPSC_cluster_2305,EUPSC_cluster_4365,EUPSC_cluster_25253	; PF01918 Alba; PF07690 Major Facilitator Superfamily-PF07690 Major Facilitator Superfamily
4437	CALMI	4436(EUPSC)	CALMI,EUPSC	oct008283F:3177..141454	138277	CALMI_Omin010698p,CALMI_Omin010699p,CALMI_Omin010700p
4336	EUPSC	4335(CALMI)	EUPSC,CALMI	Lachesis_group6__62_contigs__length_156955521:44009597..44374331	364734	EUPSC_cluster_1862,EUPSC_cluster_1178,EUPSC_cluster_6674	PF00153 Mitochondrial carrier protein-PF00153 Mitochondrial carrier protein-PF00153 Mitochondrial carrier protein; ; PF05557 Mitotic checkpoint protein
3951	CALMI	3952(OCTBI)	CALMI,OCTBI	oct008490F:22..153452	153430	CALMI_Omin015174p,CALMI_Omin015173p,CALMI_Omin015176p
4348	EUPSC	3561(CALMI)	EUPSC,OCTBI,CALMI	Lachesis_group6__62_contigs__length_156955521:22066705..22372796	306091	EUPSC_cluster_1903,EUPSC_cluster_15538,EUPSC_cluster_9692	PF07690 Major Facilitator Superfamily; PF08801 Nup133 N terminal like-PF00078 Reverse transcriptase (RNA-dependent DNA polymerase)-PF03177 Non-repetitive/WGA-negative nucleoporin C-terminal; PF00005 ABC transporter-PF00005 ABC transporter-PF12848 ABC transporter
2659	CALMI	2658(OCTBI)	EUPSC,OCTBI,CALMI	oct005621F:20020..190284	170264	CALMI_Omin014652p,CALMI_Omin014649p,CALMI_Omin014651p,CALMI_Omin014650p
4498	EUPSC	3461(CALMI),3460(OCTBI)	EUPSC,OCTBI,CALMI	Lachesis_group4__56_contigs__length_174030884:3609785..4009536	399751	EUPSC_cluster_12731,EUPSC_cluster_3610,EUPSC_cluster_19889	PF07714 Protein tyrosine kinase; PF07714 Protein tyrosine kinase; PF07714 Protein tyrosine kinase
3623	CALMI	4217(EUPSC)	CALMI,OCTBI,EUPSC	oct014276F:24411..88430	64019	CALMI_Omin028252p,CALMI_Omin028253p,CALMI_Omin028255p,CALMI_Omin028254p,CALMI_Omin028251p
4206	CALMI	4207(EUPSC)	EUPSC,CALMI	oct018898F:26193..65602	39409	CALMI_Omin018444p,CALMI_Omin018447p,CALMI_Omin018443p
2883	OCTBI	2882(CALMI),3834(CALMI)	OCTBI,CALMI	KQ416193:469676..611754	142078	OCTBI_Ocbimv22026574m.p,OCTBI_Ocbimv22026577m.p,OCTBI_Ocbimv22026578m.p,OCTBI_Ocbimv22026579m.p,OCTBI_Ocbimv22026571m.p,OCTBI_Ocbimv22026573m.p,OCTBI_Ocbimv22026568m.p
3045	OCTBI	3046(CALMI)	OCTBI,CALMI	KQ433008:12502..354077	341575	OCTBI_Ocbimv22022779m.p,OCTBI_Ocbimv22022780m.p,OCTBI_Ocbimv22022781m.p,OCTBI_Ocbimv22022777m.p
2668	CALMI	2669(OCTBI)	CALMI,OCTBI	oct000270F:59418..665541	606123	CALMI_Omin000084p,CALMI_Omin000085p,CALMI_Omin000090p,CALMI_Omin000089p,CALMI_Omin000093p,CALMI_Omin000083p,CALMI_Omin000092p,CALMI_Omin000088p
4191	CALMI	4192(EUPSC)	EUPSC,CALMI	oct000187F:120918..850118	729200	CALMI_Omin000119p,CALMI_Omin000121p,CALMI_Omin000122p
2798	CALMI	4418(EUPSC)	EUPSC,CALMI	oct002755F:53995..188902	134907	CALMI_Omin002528p,CALMI_Omin002526p,CALMI_Omin002525p,CALMI_Omin002527p
3706	CALMI	3705(OCTBI)	CALMI,OCTBI	oct000778F:1682..400847	399165	CALMI_Omin005899p,CALMI_Omin005896p,CALMI_Omin005892p,CALMI_Omin005895p
14592	OCTBI	14591(EUPSC)	OCTBI,EUPSC	KQ420220:48229..125553	77324	OCTBI_Ocbimv22027209m.p,OCTBI_Ocbimv22027210m.p,OCTBI_Ocbimv22027211m.p,OCTBI_Ocbimv22027212m.p,OCTBI_Ocbimv22027213m.p
3680	CALMI	3576(OCTBI)	CALMI,OCTBI	oct020220F:6460..55869	49409	CALMI_Omin019518p,CALMI_Omin019517p,CALMI_Omin019519p
3848	OCTBI	3849(CALMI)	OCTBI,CALMI	KQ416175:472328..571165	98837	OCTBI_Ocbimv22025887m.p,OCTBI_Ocbimv22025888m.p,OCTBI_Ocbimv22025889m.p
4302	EUPSC	3815(CALMI),3816(OCTBI)	EUPSC,CALMI,OCTBI	Lachesis_group6__62_contigs__length_156955521:58517041..58577524	60483	EUPSC_cluster_245,EUPSC_cluster_12414,EUPSC_cluster_905	PF00583 Acetyltransferase (GNAT) family; PF04568 Mitochondrial ATPase inhibitor, IATP; PF07801 Protein of unknown function (DUF1647)
3440	OCTBI	3441(CALMI)	OCTBI,CALMI	KQ426953:118985..167884	48899	OCTBI_Ocbimv22009332m.p,OCTBI_Ocbimv22009335m.p,OCTBI_Ocbimv22009336m.p
2908	CALMI	4316(EUPSC),2907(OCTBI)	EUPSC,OCTBI,CALMI	oct007177F:10466..73591	63125	CALMI_Omin014152p,CALMI_Omin014153p,CALMI_Omin014151p
3390	CALMI	3389(OCTBI),4354(EUPSC)	EUPSC,CALMI,OCTBI	oct006949F:19177..123871	104694	CALMI_Omin010853p,CALMI_Omin010855p,CALMI_Omin010854p,CALMI_Omin010856p,CALMI_Omin010857p
3228	OCTBI	3229(CALMI),4186(EUPSC)	CALMI,OCTBI,EUPSC	KQ427052:14437..77969	63532	OCTBI_Ocbimv22009601m.p,OCTBI_Ocbimv22009603m.p,OCTBI_Ocbimv22009604m.p,OCTBI_Ocbimv22009606m.p,OCTBI_Ocbimv22009608m.p
3947	CALMI	4156(EUPSC),3946(OCTBI)	EUPSC,CALMI,OCTBI	oct013655F:4218..118921	114703	CALMI_Omin028616p,CALMI_Omin028615p,CALMI_Omin028617p,CALMI_Omin028618p
3752	CALMI	3753(OCTBI),4317(EUPSC)	EUPSC,OCTBI,CALMI	oct004139F:28163..175144	146981	CALMI_Omin004211p,CALMI_Omin004209p,CALMI_Omin004210p
3559	OCTBI	3560(CALMI)	CALMI,OCTBI	KQ430209:86462..166902	80440	OCTBI_Ocbimv22017204m.p,OCTBI_Ocbimv22017205m.p,OCTBI_Ocbimv22017206m.p,OCTBI_Ocbimv22017208m.p,OCTBI_Ocbimv22017209m.p
14070	EUPSC	14069(OCTBI)	EUPSC,OCTBI	Lachesis_group8__53_contigs__length_148332072:76842031..77188894	346863	EUPSC_cluster_11911,EUPSC_cluster_12209,EUPSC_cluster_26441	PF07162 Ciliary basal body-associated, B9 protein; PF05018 Protein of unknown function (DUF667); PF00067 Cytochrome P450
14200	EUPSC	14199(OCTBI)	EUPSC,OCTBI	Lachesis_group15__55_contigs__length_125787758:21258861..21580684	321823	EUPSC_cluster_3777,EUPSC_cluster_9550,EUPSC_cluster_12521,EUPSC_cluster_13367,EUPSC_cluster_11405	PF07690 Major Facilitator Superfamily; PF02771 Acyl-CoA dehydrogenase, N-terminal domain; PF00441 Acyl-CoA dehydrogenase, C-terminal domain-PF02771 Acyl-CoA dehydrogenase, N-terminal domain-PF02770 Acyl-CoA dehydrogenase, middle domain; PF16076 Acyltransferase C-terminus-PF01553 Acyltransferase; PF01053 Cys/Met metabolism PLP-dependent enzyme
4356	EUPSC	3856(OCTBI),3857(CALMI)	EUPSC,OCTBI,CALMI	Lachesis_group2__55_contigs__length_182973478:81643705..82800484	1156779	EUPSC_cluster_871,EUPSC_cluster_26775,EUPSC_cluster_4494,EUPSC_cluster_11226,EUPSC_cluster_7537,EUPSC_cluster_16057,EUPSC_cluster_8090,EUPSC_cluster_2300,EUPSC_cluster_3564	PF00406 Adenylate kinase-PF05191 Adenylate kinase, active site lid; PF02939 UcrQ family; ; PF00001 7 transmembrane receptor (rhodopsin family)-PF00078 Reverse transcriptase (RNA-dependent DNA polymerase); PF08144 CPL (NUC119) domain; ; PF05057 Putative serine esterase (DUF676)-PF12394 Protein FAM135; PF01424 R3H domain-PF13902 R3H-associated N-terminal domain; PF16531 Centriolar protein SAS N-ter…
3931	CALMI	3932(OCTBI)	EUPSC,CALMI,OCTBI	oct005413F:99812..150651	50839	CALMI_Omin014295p,CALMI_Omin014296p,CALMI_Omin014297p
3568	CALMI	3567(OCTBI)	OCTBI,CALMI	oct000266F:662271..810826	148555	CALMI_Omin007020p,CALMI_Omin007023p,CALMI_Omin007021p
3419	CALMI	4270(EUPSC),3420(OCTBI)	OCTBI,CALMI,EUPSC	oct007697F:11554..96315	84761	CALMI_Omin013607p,CALMI_Omin013608p,CALMI_Omin013610p
4457	EUPSC	3554(OCTBI),3555(CALMI)	OCTBI,CALMI,EUPSC	Lachesis_group5__70_contigs__length_158228327:101501316..102072782	571466	EUPSC_cluster_20228,EUPSC_cluster_9482,EUPSC_cluster_15534,EUPSC_cluster_20229,EUPSC_cluster_8239,EUPSC_cluster_20232,EUPSC_cluster_15515	PF13637 Ankyrin repeats (many copies); PF01189 16S rRNA methyltransferase RsmB/F; ; PF07728 AAA domain (dynein-related subfamily)-PF07728 AAA domain (dynein-related subfamily)-PF07728 AAA domain (dynein-related subfamily)-PF07728 AAA domain (dynein-related subfamily)-PF07728 AAA domain (dynein-related subfamily)-PF07728 AAA domain (dynein-related subfamily)-PF07728 AAA domain (dynein-related subf…
3463	OCTBI	3464(CALMI)	OCTBI,CALMI	KQ427263:65031..151945	86914	OCTBI_Ocbimv22010106m.p,OCTBI_Ocbimv22010111m.p,OCTBI_Ocbimv22010112m.p,OCTBI_Ocbimv22010113m.p
3856	OCTBI	4356(EUPSC),3857(CALMI)	EUPSC,OCTBI,CALMI	KQ420346:25210..605287	580077	OCTBI_Ocbimv22027697m.p,OCTBI_Ocbimv22027698m.p,OCTBI_Ocbimv22027700m.p,OCTBI_Ocbimv22027702m.p,OCTBI_Ocbimv22027704m.p,OCTBI_Ocbimv22027705m.p,OCTBI_Ocbimv22027707m.p
3036	OCTBI	3037(CALMI),13981(EUPSC)	EUPSC,OCTBI,CALMI	KQ418098:119740..436951	317211	OCTBI_Ocbimv22014180m.p,OCTBI_Ocbimv22014181m.p,OCTBI_Ocbimv22014182m.p,OCTBI_Ocbimv22014183m.p,OCTBI_Ocbimv22014185m.p
2580	CALMI	2581(OCTBI)	CALMI,OCTBI,EUPSC	oct008572F:1..179451	179450	CALMI_Omin013592p,CALMI_Omin013595p,CALMI_Omin013591p,CALMI_Omin013593p,CALMI_Omin013590p,CALMI_Omin013594p
2757	OCTBI	2756(CALMI)	CALMI,OCTBI	KQ429763:201..50056	49855	OCTBI_Ocbimv22016231m.p,OCTBI_Ocbimv22016232m.p,OCTBI_Ocbimv22016234m.p,OCTBI_Ocbimv22016235m.p
2942	OCTBI	13803(EUPSC),2941(CALMI)	CALMI,OCTBI,EUPSC	KQ418994:1807..325086	323279	OCTBI_Ocbimv22021018m.p,OCTBI_Ocbimv22021019m.p,OCTBI_Ocbimv22021020m.p,OCTBI_Ocbimv22021021m.p,OCTBI_Ocbimv22021022m.p,OCTBI_Ocbimv22021026m.p,OCTBI_Ocbimv22021027m.p
14398	EUPSC	14397(OCTBI)	OCTBI,EUPSC	Lachesis_group1__63_contigs__length_187967259:48147411..49059553	912142	EUPSC_cluster_27504,EUPSC_cluster_8400,EUPSC_cluster_15724,EUPSC_cluster_8282,EUPSC_cluster_3129,EUPSC_cluster_8828	PF00240 Ubiquitin family; PF07678 A-macroglobulin complement component-PF00207 Alpha-2-macroglobulin family-PF01835 MG2 domain-PF07703 Alpha-2-macroglobulin family N-terminal region-PF07677 A-macroglobulin receptor; PF00171 Aldehyde dehydrogenase family-PF00171 Aldehyde dehydrogenase family-PF02911 Formyl transferase, C-terminal domain-PF00551 Formyl transferase-PF00550 Phosphopantetheine attachm…
4345	EUPSC	2787(OCTBI),2786(CALMI)	EUPSC,CALMI,OCTBI	Lachesis_group0__68_contigs__length_203855924:57980536..58297734	317198	EUPSC_cluster_8839,EUPSC_cluster_2415,EUPSC_cluster_15056,EUPSC_cluster_15616,EUPSC_cluster_13484	PF14632 Acidic N-terminal SPT6-PF14878 Death-like domain of SPT6-PF14639 Holliday-junction resolvase-like of SPT6-PF14635 Helix-hairpin-helix motif; PF02466 Tim17/Tim22/Tim23/Pmp24 family; PF10259 Rogdi leucine zipper containing protein; ; PF13920 Zinc finger, C3HC4 type (RING finger)
4495	EUPSC	3176(CALMI),3175(OCTBI)	EUPSC,OCTBI,CALMI	Lachesis_group6__62_contigs__length_156955521:147948757..148137400	188643	EUPSC_cluster_29100,EUPSC_cluster_16963,EUPSC_cluster_4688,EUPSC_cluster_14131	PF05347 Complex 1 protein (LYR family); PF00685 Sulfotransferase domain; ; PF04516 CP2 transcription factor
6906	EUPSC	6610(OCTBI)	OCTBI,EUPSC	Lachesis_group2__55_contigs__length_182973478:71935528..74549402	2613874	EUPSC_cluster_7123,EUPSC_cluster_6467,EUPSC_cluster_14846,EUPSC_cluster_17242,EUPSC_cluster_3725,EUPSC_cluster_1765,EUPSC_cluster_17228,EUPSC_cluster_2873,EUPSC_cluster_10937,EUPSC_cluster_17231,EUPSC_cluster_17232,EUPSC_cluster_17233,EUPSC_cluster_17234,EUPSC_cluster_17235,EUPSC_cluster_17236	PF09746 Tumour-associated protein; PF02460 Patched family-PF02460 Patched family; PF00004 ATPase family associated with various cellular activities (AAA)-PF00004 ATPase family associated with various cellular activities (AAA)-PF02933 Cell division protein 48 (CDC48), domain 2-PF02359 Cell division protein 48 (CDC48), N-terminal domain-PF09336 Vps4 C terminal oligomerisation domain; PF04133 Vacuol…
6610	OCTBI	6906(EUPSC)	OCTBI,EUPSC	KQ422909:257434..1026694	769260	OCTBI_Ocbimv22037037m.p,OCTBI_Ocbimv22037041m.p,OCTBI_Ocbimv22037042m.p,OCTBI_Ocbimv22037043m.p,OCTBI_Ocbimv22037045m.p,OCTBI_Ocbimv22037026m.p,OCTBI_Ocbimv22037028m.p,OCTBI_Ocbimv22037029m.p,OCTBI_Ocbimv22037033m.p,OCTBI_Ocbimv22037025m.p,OCTBI_Ocbimv22037031m.p,OCTBI_Ocbimv22037032m.p
14264	EUPSC	3031(OCTBI)	OCTBI,EUPSC	Lachesis_group40__41_contigs__length_53238745:23027228..23395707	368479	EUPSC_cluster_24109,EUPSC_cluster_24108,EUPSC_cluster_24107	PF00454 Phosphatidylinositol 3- and 4-kinase-PF02260 FATC domain; PF08163 NUC194 domain-PF08163 NUC194 domain-PF02259 FAT domain; PF15256 SPATIAL
2665	OCTBI	2664(CALMI),4245(EUPSC)	CALMI,OCTBI,EUPSC	KQ416600:108482..276475	167993	OCTBI_Ocbimv22035769m.p,OCTBI_Ocbimv22035770m.p,OCTBI_Ocbimv22035772m.p,OCTBI_Ocbimv22035773m.p,OCTBI_Ocbimv22035774m.p
4156	EUPSC	3947(CALMI),3946(OCTBI)	CALMI,OCTBI,EUPSC	Lachesis_group10__55_contigs__length_138218214:114937133..115221838	284705	EUPSC_cluster_5235,EUPSC_cluster_5234,EUPSC_cluster_7216	; ; PF13001 Proteasome stabiliser
14305	OCTBI	14304(EUPSC)	OCTBI,EUPSC	KQ417386:360376..1059141	698765	OCTBI_Ocbimv22007160m.p,OCTBI_Ocbimv22007164m.p,OCTBI_Ocbimv22007165m.p
14411	OCTBI	14412(EUPSC)	EUPSC,OCTBI	KQ425681:91001..200047	109046	OCTBI_Ocbimv22005618m.p,OCTBI_Ocbimv22005619m.p,OCTBI_Ocbimv22005621m.p
3845	OCTBI	3844(CALMI)	OCTBI,CALMI	KQ416933:118529..315751	197222	OCTBI_Ocbimv22001430m.p,OCTBI_Ocbimv22001433m.p,OCTBI_Ocbimv22001435m.p,OCTBI_Ocbimv22001436m.p,OCTBI_Ocbimv22001437m.p,OCTBI_Ocbimv22001439m.p,OCTBI_Ocbimv22001442m.p,OCTBI_Ocbimv22001443m.p,OCTBI_Ocbimv22001440m.p
13911	OCTBI	13912(EUPSC)	OCTBI,EUPSC	KQ429661:84884..173614	88730	OCTBI_Ocbimv22016023m.p,OCTBI_Ocbimv22016024m.p,OCTBI_Ocbimv22016025m.p
2718	OCTBI	2717(CALMI)	CALMI,OCTBI	KQ417110:12007..112916	100909	OCTBI_Ocbimv22003765m.p,OCTBI_Ocbimv22003766m.p,OCTBI_Ocbimv22003769m.p,OCTBI_Ocbimv22003770m.p
14049	EUPSC	14050(OCTBI)	OCTBI,EUPSC	Lachesis_group1__63_contigs__length_187967259:96687773..97020504	332731	EUPSC_cluster_3115,EUPSC_cluster_15870,EUPSC_cluster_18113,EUPSC_cluster_2530	; ; ; PF00433 Protein kinase C terminal domain-PF00564 PB1 domain-PF00130 Phorbol esters/diacylglycerol binding domain (C1 domain)-PF00069 Protein kinase domain
3522	CALMI	3472(OCTBI)	EUPSC,CALMI,OCTBI	oct000337F:3843..797311	793468	CALMI_Omin000554p,CALMI_Omin000557p,CALMI_Omin000545p,CALMI_Omin000552p,CALMI_Omin000553p,CALMI_Omin000547p,CALMI_Omin000544p,CALMI_Omin000551p,CALMI_Omin000546p,CALMI_Omin000550p,CALMI_Omin000542p,CALMI_Omin000543p,CALMI_Omin000555p,CALMI_Omin000556p
9964	OCTBI	12220(EUPSC)	OCTBI,EUPSC	KQ424530:227358..1166341	938983	OCTBI_Ocbimv22002063m.p,OCTBI_Ocbimv22002066m.p,OCTBI_Ocbimv22002068m.p,OCTBI_Ocbimv22002067m.p,OCTBI_Ocbimv22002056m.p,OCTBI_Ocbimv22002059m.p,OCTBI_Ocbimv22002061m.p,OCTBI_Ocbimv22002070m.p
14346	EUPSC	14345(OCTBI)	OCTBI,EUPSC	Lachesis_group1__63_contigs__length_187967259:11044770..11625842	581072	EUPSC_cluster_10219,EUPSC_cluster_9893,EUPSC_cluster_1439,EUPSC_cluster_2001	PF01249 Ribosomal protein S21e; PF12796 Ankyrin repeats (3 copies)-PF12796 Ankyrin repeats (3 copies)-PF12796 Ankyrin repeats (3 copies); PF00089 Trypsin-PF07714 Protein tyrosine kinase; PF00481 Protein phosphatase 2C-PF00481 Protein phosphatase 2C
2753	OCTBI	2754(CALMI)	CALMI,OCTBI	KQ418789:55160..171031	115871	OCTBI_Ocbimv22019577m.p,OCTBI_Ocbimv22019578m.p,OCTBI_Ocbimv22019585m.p
2988	CALMI	2674(OCTBI)	CALMI,OCTBI	oct014594F:2119..96164	94045	CALMI_Omin025335p,CALMI_Omin025338p,CALMI_Omin025336p,CALMI_Omin025339p
14397	OCTBI	14398(EUPSC)	EUPSC,OCTBI	KQ421261:35557..431576	396019	OCTBI_Ocbimv22031486m.p,OCTBI_Ocbimv22031487m.p,OCTBI_Ocbimv22031489m.p,OCTBI_Ocbimv22031492m.p,OCTBI_Ocbimv22031493m.p,OCTBI_Ocbimv22031496m.p
3072	CALMI	3073(OCTBI)	OCTBI,CALMI	oct002296F:27172..223761	196589	CALMI_Omin005700p,CALMI_Omin005698p,CALMI_Omin005694p,CALMI_Omin005701p,CALMI_Omin005699p,CALMI_Omin005693p,CALMI_Omin005692p
2500	OCTBI	4233(EUPSC),2499(CALMI)	CALMI,OCTBI,EUPSC	KQ427521:1502..292041	290539	OCTBI_Ocbimv22010782m.p,OCTBI_Ocbimv22010783m.p,OCTBI_Ocbimv22010786m.p,OCTBI_Ocbimv22010787m.p,OCTBI_Ocbimv22010781m.p,OCTBI_Ocbimv22010780m.p,OCTBI_Ocbimv22010788m.p
2527	OCTBI	13869(EUPSC),2526(CALMI)	EUPSC,CALMI,OCTBI	KQ421325:52264..155628	103364	OCTBI_Ocbimv22031711m.p,OCTBI_Ocbimv22031712m.p,OCTBI_Ocbimv22031713m.p,OCTBI_Ocbimv22031714m.p,OCTBI_Ocbimv22031715m.p,OCTBI_Ocbimv22031709m.p,OCTBI_Ocbimv22031716m.p
4418	EUPSC	2798(CALMI),3873(CALMI)	EUPSC,CALMI	Lachesis_group28__49_contigs__length_91470296:12122677..12829381	706704	EUPSC_cluster_13899,EUPSC_cluster_23097,EUPSC_cluster_6461,EUPSC_cluster_14176,EUPSC_cluster_25358	PF00995 Sec1 family; PF03370 Carbohydrate/starch-binding module (family 21)-PF03370 Carbohydrate/starch-binding module (family 21); PF07690 Major Facilitator Superfamily; PF15053 Mjmu-R1-like protein family; PF15053 Mjmu-R1-like protein family
3943	OCTBI	3942(CALMI)	CALMI,OCTBI	KQ416694:2759370..2795949	36579	OCTBI_Ocbimv22037422m.p,OCTBI_Ocbimv22037423m.p,OCTBI_Ocbimv22037425m.p,OCTBI_Ocbimv22037427m.p
13821	EUPSC	13822(OCTBI)	EUPSC,OCTBI	Lachesis_group4__56_contigs__length_174030884:167590650..169704405	2113755	EUPSC_cluster_25185,EUPSC_cluster_5834,EUPSC_cluster_7769	; PF12937 F-box-like-PF00621 RhoGEF domain; PF07690 Major Facilitator Superfamily
14144	OCTBI	14143(EUPSC)	OCTBI,EUPSC	KQ426075:425612..449819	24207	OCTBI_Ocbimv22006704m.p,OCTBI_Ocbimv22006705m.p,OCTBI_Ocbimv22006706m.p
3366	CALMI	4153(EUPSC),3365(OCTBI)	CALMI,OCTBI,EUPSC	oct001018F:8406..118692	110286	CALMI_Omin008513p,CALMI_Omin008509p,CALMI_Omin008514p,CALMI_Omin008512p,CALMI_Omin008515p
3960	OCTBI	3959(CALMI)	OCTBI,CALMI	KQ416499:115075..240915	125840	OCTBI_Ocbimv22033929m.p,OCTBI_Ocbimv22033930m.p,OCTBI_Ocbimv22033932m.p,OCTBI_Ocbimv22033933m.p,OCTBI_Ocbimv22033935m.p
4229	EUPSC	2648(CALMI),4454(CALMI),2480(OCTBI)	EUPSC,OCTBI,CALMI	Lachesis_group12__46_contigs__length_133395132:17304288..17534441	230153	EUPSC_cluster_24761,EUPSC_cluster_8807,EUPSC_cluster_24760,EUPSC_cluster_2366,EUPSC_cluster_11326	; PF08336 Prolyl 4-Hydroxylase alpha-subunit, N-terminal region; PF08336 Prolyl 4-Hydroxylase alpha-subunit, N-terminal region; PF08336 Prolyl 4-Hydroxylase alpha-subunit, N-terminal region-PF13640 2OG-Fe(II) oxygenase superfamily; PF08336 Prolyl 4-Hydroxylase alpha-subunit, N-terminal region
3467	OCTBI	1909(CALMI)	CALMI,OCTBI	KQ427028:275089..451300	176211	OCTBI_Ocbimv22009567m.p,OCTBI_Ocbimv22009568m.p,OCTBI_Ocbimv22009569m.p,OCTBI_Ocbimv22009571m.p,OCTBI_Ocbimv22009572m.p,OCTBI_Ocbimv22009573m.p,OCTBI_Ocbimv22009575m.p
3166	CALMI	3163(OCTBI),2842(OCTBI)	OCTBI,CALMI	oct004458F:54842..251648	196806	CALMI_Omin003122p,CALMI_Omin003130p,CALMI_Omin003131p,CALMI_Omin003125p,CALMI_Omin003123p,CALMI_Omin003132p,CALMI_Omin003129p
14331	EUPSC	14330(OCTBI)	EUPSC,OCTBI	Lachesis_group6__62_contigs__length_156955521:45321304..45995087	673783	EUPSC_cluster_14279,EUPSC_cluster_27969,EUPSC_cluster_27967,EUPSC_cluster_14516,EUPSC_cluster_27959	PF00378 Enoyl-CoA hydratase/isomerase; PF01392 Fz domain-PF00378 Enoyl-CoA hydratase/isomerase; PF00822 PMP-22/EMP/MP20/Claudin family; PF12352 Snare region anchored in the vesicle membrane C-terminus;
4311	EUPSC	4310(CALMI)	CALMI,EUPSC	Lachesis_group10__55_contigs__length_138218214:106834210..106907698	73488	EUPSC_cluster_16676,EUPSC_cluster_16677,EUPSC_cluster_1663	PF05193 Peptidase M16 inactive domain-PF00675 Insulinase (Peptidase family M16); PF16187 Middle or third domain of peptidase_M16; PF05189 RNA 3'-terminal phosphate cyclase (RTC), insert domain-PF01137 RNA 3'-terminal phosphate cyclase
13804	EUPSC	13805(OCTBI)	OCTBI,EUPSC	Lachesis_group5__70_contigs__length_158228327:27230678..28398307	1167629	EUPSC_cluster_2806,EUPSC_cluster_17031,EUPSC_cluster_17030	PF13855 Leucine rich repeat-PF13855 Leucine rich repeat-PF13306 Leucine rich repeats (6 copies); PF00096 Zinc finger, C2H2 type-PF00096 Zinc finger, C2H2 type-PF00096 Zinc finger, C2H2 type-PF00096 Zinc finger, C2H2 type-PF00096 Zinc finger, C2H2 type-PF00096 Zinc finger, C2H2 type-PF00096 Zinc finger, C2H2 type-PF00096 Zinc finger, C2H2 type-PF00096 Zinc finger, C2H2 type-PF00096 Zinc finger, C2…
2864	CALMI	3051(OCTBI)	OCTBI,CALMI	oct004603F:428..179052	178624	CALMI_Omin005139p,CALMI_Omin005142p,CALMI_Omin005141p,CALMI_Omin005140p,CALMI_Omin005143p,CALMI_Omin005144p,CALMI_Omin005145p
14543	EUPSC	3765(OCTBI)	OCTBI,EUPSC	Lachesis_group20__56_contigs__length_105542877:54150565..55153676	1003111	EUPSC_cluster_24210,EUPSC_cluster_9882,EUPSC_cluster_24214,EUPSC_cluster_2512,EUPSC_cluster_24216,EUPSC_cluster_14051,EUPSC_cluster_14563	; ; PF00703 Glycosyl hydrolases family 2-PF02837 Glycosyl hydrolases family 2, sugar binding domain-PF02836 Glycosyl hydrolases family 2, TIM barrel domain; PF14768 Replication protein A interacting C-terminal-PF14766 Replication protein A interacting N-terminal; PF16737 PHD finger protein 12 MRG binding domain-PF00628 PHD-finger-PF00628 PHD-finger; ;
3644	OCTBI	3643(CALMI)	OCTBI,CALMI	KQ417055:374085..666136	292051	OCTBI_Ocbimv22003018m.p,OCTBI_Ocbimv22003020m.p,OCTBI_Ocbimv22003023m.p
3082	CALMI	3083(OCTBI)	OCTBI,CALMI	oct002436F:139209..268262	129053	CALMI_Omin003058p,CALMI_Omin003060p,CALMI_Omin003061p,CALMI_Omin003056p,CALMI_Omin003057p
3811	OCTBI	3810(CALMI),13920(EUPSC)	OCTBI,CALMI,EUPSC	KQ421984:1613..78209	76596	OCTBI_Ocbimv22034123m.p,OCTBI_Ocbimv22034124m.p,OCTBI_Ocbimv22034126m.p,OCTBI_Ocbimv22034121m.p,OCTBI_Ocbimv22034122m.p
14151	OCTBI	6888(EUPSC)	OCTBI,EUPSC	KQ420779:293094..448194	155100	OCTBI_Ocbimv22029588m.p,OCTBI_Ocbimv22029589m.p,OCTBI_Ocbimv22029591m.p,OCTBI_Ocbimv22029593m.p,OCTBI_Ocbimv22029597m.p
4276	EUPSC	3363(OCTBI),3364(CALMI)	EUPSC,OCTBI,CALMI	Lachesis_group43__26_contigs__length_23511657:18822967..19477544	654577	EUPSC_cluster_9884,EUPSC_cluster_25017,EUPSC_cluster_6615,EUPSC_cluster_6616,EUPSC_cluster_8900,EUPSC_cluster_4402	; ; PF00130 Phorbol esters/diacylglycerol binding domain (C1 domain)-PF13901 Putative zinc-RING and/or ribbon; PF00130 Phorbol esters/diacylglycerol binding domain (C1 domain)-PF13901 Putative zinc-RING and/or ribbon; ; PF07885 Ion channel-PF03530 Calcium-activated SK potassium channel-PF02888 Calmodulin binding domain
13909	OCTBI	13910(EUPSC)	OCTBI,EUPSC	KQ415861:7471..393352	385881	OCTBI_Ocbimv22009136m.p,OCTBI_Ocbimv22009137m.p,OCTBI_Ocbimv22009138m.p,OCTBI_Ocbimv22009143m.p,OCTBI_Ocbimv22009145m.p,OCTBI_Ocbimv22009147m.p,OCTBI_Ocbimv22009149m.p
3872	OCTBI	14521(EUPSC),3871(CALMI)	EUPSC,CALMI,OCTBI	KQ423486:1207..146206	144999	OCTBI_Ocbimv22038880m.p,OCTBI_Ocbimv22038881m.p,OCTBI_Ocbimv22038884m.p,OCTBI_Ocbimv22038883m.p
4433	EUPSC	3912(OCTBI),3911(CALMI)	EUPSC,OCTBI,CALMI	Lachesis_group1__63_contigs__length_187967259:33994390..34360978	366588	EUPSC_cluster_8120,EUPSC_cluster_27462,EUPSC_cluster_1390,EUPSC_cluster_3195	PF07992 Pyridine nucleotide-disulphide oxidoreductase-PF02852 Pyridine nucleotide-disulphide oxidoreductase, dimerisation domain; PF13637 Ankyrin repeats (many copies); PF00582 Universal stress protein family; PF02174 PTB domain (IRS-1 type)
4182	EUPSC	4183(CALMI)	EUPSC,CALMI	Lachesis_group24__36_contigs__length_98752639:89977296..91089743	1112447	EUPSC_cluster_148,EUPSC_cluster_28800,EUPSC_cluster_28772	PF03318 Clostridium epsilon toxin ETX/Bacillus mosquitocidal toxin MTX2; PF04969 CS domain;
14199	OCTBI	14200(EUPSC)	OCTBI,EUPSC	KQ416594:618..83835	83217	OCTBI_Ocbimv22035593m.p,OCTBI_Ocbimv22035594m.p,OCTBI_Ocbimv22035595m.p,OCTBI_Ocbimv22035597m.p
3110	OCTBI	3109(CALMI)	CALMI,OCTBI	KQ429209:2831..44146	41315	OCTBI_Ocbimv22015212m.p,OCTBI_Ocbimv22015214m.p,OCTBI_Ocbimv22015215m.p
2985	CALMI	2984(OCTBI)	OCTBI,CALMI,EUPSC	oct011057F:1241..71498	70257	CALMI_Omin025762p,CALMI_Omin025761p,CALMI_Omin025764p,CALMI_Omin025763p
2544	OCTBI	4363(EUPSC)	OCTBI,EUPSC	KQ416198:73614..510522	436908	OCTBI_Ocbimv22026727m.p,OCTBI_Ocbimv22026728m.p,OCTBI_Ocbimv22026729m.p,OCTBI_Ocbimv22026730m.p,OCTBI_Ocbimv22026733m.p,OCTBI_Ocbimv22026734m.p,OCTBI_Ocbimv22026735m.p,OCTBI_Ocbimv22026737m.p,OCTBI_Ocbimv22026741m.p,OCTBI_Ocbimv22026742m.p,OCTBI_Ocbimv22026743m.p,OCTBI_Ocbimv22026744m.p,OCTBI_Ocbimv22026745m.p,OCTBI_Ocbimv22026746m.p,OCTBI_Ocbimv22026731m.p
4415	EUPSC	3307(OCTBI),3651(CALMI)	OCTBI,CALMI,EUPSC	Lachesis_group1__63_contigs__length_187967259:126741768..127087329	345561	EUPSC_cluster_10835,EUPSC_cluster_9751,EUPSC_cluster_16232,EUPSC_cluster_14681,EUPSC_cluster_449,EUPSC_cluster_9602,EUPSC_cluster_7042	PF00076 RNA recognition motif. (a.k.a. RRM, RBD, or RNP domain)-PF00076 RNA recognition motif. (a.k.a. RRM, RBD, or RNP domain); PF13424 Tetratricopeptide repeat; PF13424 Tetratricopeptide repeat; PF16661 Metallo-beta-lactamase superfamily domain-PF07521 Zn-dependent metallo-hydrolase RNA specificity domain-PF10996 Beta-Casp domain; ; PF08718 Glycolipid transfer protein (GLTP); PF03483 B3/4 domai…
3776	OCTBI	3777(CALMI)	EUPSC,OCTBI,CALMI	KQ419491:23014..83235	60221	OCTBI_Ocbimv22023870m.p,OCTBI_Ocbimv22023876m.p,OCTBI_Ocbimv22023878m.p
2733	CALMI	4241(EUPSC),2734(OCTBI)	EUPSC,CALMI,OCTBI	oct001761F:7107..239364	232257	CALMI_Omin001656p,CALMI_Omin001652p,CALMI_Omin001653p,CALMI_Omin001654p,CALMI_Omin001655p,CALMI_Omin001651p
4172	EUPSC	3756(CALMI),2982(OCTBI)	EUPSC,CALMI,OCTBI	Lachesis_group2__55_contigs__length_182973478:86280547..86480967	200420	EUPSC_cluster_10596,EUPSC_cluster_5094,EUPSC_cluster_6507,EUPSC_cluster_8118	PF05676 NADH-ubiquinone oxidoreductase B18 subunit (NDUFB7); PF13537 Glutamine amidotransferase domain-PF00733 Asparagine synthase; PF00069 Protein kinase domain;
3474	OCTBI	3473(CALMI)	CALMI,OCTBI	KQ416641:108335..154278	45943	OCTBI_Ocbimv22036405m.p,OCTBI_Ocbimv22036409m.p,OCTBI_Ocbimv22036410m.p
3011	OCTBI	3012(CALMI),3050(CALMI)	CALMI,OCTBI	KQ419201:121263..146216	24953	OCTBI_Ocbimv22022338m.p,OCTBI_Ocbimv22022339m.p,OCTBI_Ocbimv22022340m.p
2803	OCTBI	2802(CALMI)	CALMI,OCTBI	KQ420023:331467..366031	34564	OCTBI_Ocbimv22026295m.p,OCTBI_Ocbimv22026297m.p,OCTBI_Ocbimv22026298m.p
4286	EUPSC	3427(CALMI)	EUPSC,OCTBI,CALMI	Lachesis_group6__62_contigs__length_156955521:102780665..103035378	254713	EUPSC_cluster_25647,EUPSC_cluster_4382,EUPSC_cluster_25648,EUPSC_cluster_3839,EUPSC_cluster_5339	PF03981 Ubiquinol-cytochrome C chaperone; ; ; PF00018 SH3 domain-PF00790 VHS domain-PF02809 Ubiquitin interaction motif;
2887	OCTBI	2886(CALMI),4230(EUPSC)	CALMI,OCTBI,EUPSC	KQ415990:1990152..2237165	247013	OCTBI_Ocbimv22018228m.p,OCTBI_Ocbimv22018229m.p,OCTBI_Ocbimv22018231m.p,OCTBI_Ocbimv22018232m.p,OCTBI_Ocbimv22018234m.p,OCTBI_Ocbimv22018225m.p,OCTBI_Ocbimv22018226m.p
14531	OCTBI	14532(EUPSC)	EUPSC,OCTBI	KQ418194:414482..449054	34572	OCTBI_Ocbimv22015025m.p,OCTBI_Ocbimv22015026m.p,OCTBI_Ocbimv22015030m.p
3310	OCTBI	3311(CALMI)	OCTBI,CALMI	KQ422458:13710..102205	88495	OCTBI_Ocbimv22035598m.p,OCTBI_Ocbimv22035599m.p,OCTBI_Ocbimv22035600m.p,OCTBI_Ocbimv22035601m.p,OCTBI_Ocbimv22035603m.p
3627	CALMI	3626(OCTBI),4428(EUPSC)	EUPSC,OCTBI,CALMI	oct003149F:7629..128331	120702	CALMI_Omin008005p,CALMI_Omin008004p,CALMI_Omin008002p,CALMI_Omin008003p,CALMI_Omin008001p
3600	CALMI	4330(EUPSC),3599(OCTBI)	OCTBI,CALMI,EUPSC	oct000990F:322..431216	430894	CALMI_Omin001141p,CALMI_Omin001147p,CALMI_Omin001146p,CALMI_Omin001139p,CALMI_Omin001143p,CALMI_Omin001144p
14343	EUPSC	3533(OCTBI)	EUPSC,OCTBI,CALMI	Lachesis_group25__42_contigs__length_94613958:66200388..67732674	1532286	EUPSC_cluster_17246,EUPSC_cluster_17223,EUPSC_cluster_1055	PF08669 Glycine cleavage T-protein C-terminal barrel domain; ; PF07690 Major Facilitator Superfamily
14228	OCTBI	14229(EUPSC)	EUPSC,OCTBI	KQ426760:201095..331850	130755	OCTBI_Ocbimv22008758m.p,OCTBI_Ocbimv22008759m.p,OCTBI_Ocbimv22008760m.p,OCTBI_Ocbimv22008761m.p
3499	OCTBI	3500(CALMI)	CALMI,OCTBI	KQ421085:53866..166642	112776	OCTBI_Ocbimv22030764m.p,OCTBI_Ocbimv22030766m.p,OCTBI_Ocbimv22030768m.p,OCTBI_Ocbimv22030770m.p
3349	OCTBI	3348(CALMI)	EUPSC,CALMI,OCTBI	KQ418036:14535..99654	85119	OCTBI_Ocbimv22013550m.p,OCTBI_Ocbimv22013551m.p,OCTBI_Ocbimv22013552m.p
14222	EUPSC	3041(OCTBI)	EUPSC,CALMI,OCTBI	Lachesis_group32__40_contigs__length_78634074:47852021..48286534	434513	EUPSC_cluster_16,EUPSC_cluster_11653,EUPSC_cluster_3037	PF02891 MIZ/SP-RING zinc finger-PF14324 PINIT domain; PF01058 NADH ubiquinone oxidoreductase, 20 Kd subunit; PF02886 LBP / BPI / CETP family, C-terminal domain-PF01273 LBP / BPI / CETP family, N-terminal domain
3332	CALMI	3331(OCTBI)	CALMI,OCTBI	oct001293F:22321..160070	137749	CALMI_Omin008572p,CALMI_Omin008577p,CALMI_Omin008574p,CALMI_Omin008575p,CALMI_Omin008580p,CALMI_Omin008579p
14541	EUPSC	14542(OCTBI)	OCTBI,EUPSC	Lachesis_group18__53_contigs__length_106174747:22015041..22603008	587967	EUPSC_cluster_12781,EUPSC_cluster_3900,EUPSC_cluster_21740,EUPSC_cluster_6225,EUPSC_cluster_7150	PF00136 DNA polymerase family B-PF03104 DNA polymerase family B, exonuclease domain; ; ; PF07690 Major Facilitator Superfamily; PF00566 Rab-GTPase-TBC domain
14464	OCTBI	14463(EUPSC)	OCTBI,EUPSC	KQ416192:113726..179526	65800	OCTBI_Ocbimv22026549m.p,OCTBI_Ocbimv22026551m.p,OCTBI_Ocbimv22026552m.p
3578	CALMI	3577(OCTBI)	OCTBI,CALMI	oct000106F:774629..943025	168396	CALMI_Omin007375p,CALMI_Omin007378p,CALMI_Omin007376p
3291	CALMI	3290(OCTBI)	OCTBI,CALMI	oct012395F:30626..97743	67117	CALMI_Omin026156p,CALMI_Omin026155p,CALMI_Omin026154p
3473	CALMI	3474(OCTBI)	OCTBI,CALMI	oct000722F:459223..534462	75239	CALMI_Omin002300p,CALMI_Omin002298p,CALMI_Omin002299p
14153	OCTBI	14152(EUPSC)	OCTBI,EUPSC	KQ425611:42513..218517	176004	OCTBI_Ocbimv22005460m.p,OCTBI_Ocbimv22005461m.p,OCTBI_Ocbimv22005462m.p,OCTBI_Ocbimv22005463m.p
2804	CALMI	2805(OCTBI)	CALMI,OCTBI	oct000933F:12468..510777	498309	CALMI_Omin003033p,CALMI_Omin003036p,CALMI_Omin003035p
14015	EUPSC	14014(OCTBI)	EUPSC,OCTBI	Lachesis_group13__58_contigs__length_132030582:16908612..17004593	95981	EUPSC_cluster_12972,EUPSC_cluster_17387,EUPSC_cluster_2307	PF00198 2-oxoacid dehydrogenases acyltransferase (catalytic domain)-PF00364 Biotin-requiring enzyme-PF00364 Biotin-requiring enzyme-PF00364 Biotin-requiring enzyme-PF02817 e3 binding domain; ; PF00270 DEAD/DEAH box helicase-PF00271 Helicase conserved C-terminal domain
3106	OCTBI	3738(CALMI),3105(CALMI)	OCTBI,CALMI	KQ416062:46617..84459	37842	OCTBI_Ocbimv22022214m.p,OCTBI_Ocbimv22022215m.p,OCTBI_Ocbimv22022216m.p
3825	OCTBI	3826(CALMI)	OCTBI,CALMI,EUPSC	KQ426997:44685..161678	116993	OCTBI_Ocbimv22009444m.p,OCTBI_Ocbimv22009446m.p,OCTBI_Ocbimv22009447m.p
14211	EUPSC	14210(OCTBI)	OCTBI,EUPSC	Lachesis_group9__67_contigs__length_144638433:12041203..12703847	662644	EUPSC_cluster_9228,EUPSC_cluster_17944,EUPSC_cluster_17945,EUPSC_cluster_17946,EUPSC_cluster_1232,EUPSC_cluster_14027,EUPSC_cluster_15172	; PF13091 PLD-like domain; PF13975 gag-polyprotein putative aspartyl protease-PF13091 PLD-like domain-PF00098 Zinc knuckle; PF13091 PLD-like domain; PF14638 Folliculin-interacting protein C-terminus-PF14637 Folliculin-interacting protein middle domain-PF14636 Folliculin-interacting protein N-terminus; PF06239 Evolutionarily conserved signalling intermediate in Toll pathway; PF00621 RhoGEF domain
3420	OCTBI	4270(EUPSC),3419(CALMI)	CALMI,OCTBI,EUPSC	KQ417318:147094..213984	66890	OCTBI_Ocbimv22006390m.p,OCTBI_Ocbimv22006392m.p,OCTBI_Ocbimv22006393m.p
3407	CALMI	2658(OCTBI)	CALMI,OCTBI,EUPSC	oct016023F:15549..74625	59076	CALMI_Omin018101p,CALMI_Omin018099p,CALMI_Omin018100p
3248	OCTBI	3247(CALMI),4377(EUPSC)	EUPSC,CALMI,OCTBI	KQ420673:95215..463367	368152	OCTBI_Ocbimv22029184m.p,OCTBI_Ocbimv22029186m.p,OCTBI_Ocbimv22029188m.p,OCTBI_Ocbimv22029189m.p,OCTBI_Ocbimv22029190m.p,OCTBI_Ocbimv22029191m.p,OCTBI_Ocbimv22029194m.p
14554	OCTBI	14553(EUPSC)	EUPSC,OCTBI	KQ419087:15841..233963	218122	OCTBI_Ocbimv22021701m.p,OCTBI_Ocbimv22021703m.p,OCTBI_Ocbimv22021706m.p
14186	EUPSC	3800(OCTBI)	EUPSC,OCTBI,CALMI	Lachesis_group16__53_contigs__length_120303996:79505433..79741105	235672	EUPSC_cluster_6416,EUPSC_cluster_14811,EUPSC_cluster_14426	PF01008 Initiation factor 2 subunit family; PF13899 Thioredoxin-like; PF05495 CHY zinc finger-PF13639 Ring finger domain-PF14599 Zinc-ribbon
2543	OCTBI	4381(EUPSC),2542(CALMI)	OCTBI,CALMI,EUPSC	KQ416877:498356..1189474	691118	OCTBI_Ocbimv22000716m.p,OCTBI_Ocbimv22000717m.p,OCTBI_Ocbimv22000719m.p,OCTBI_Ocbimv22000721m.p,OCTBI_Ocbimv22000723m.p,OCTBI_Ocbimv22000724m.p,OCTBI_Ocbimv22000725m.p,OCTBI_Ocbimv22000732m.p,OCTBI_Ocbimv22000734m.p,OCTBI_Ocbimv22000735m.p,OCTBI_Ocbimv22000737m.p,OCTBI_Ocbimv22000740m.p
994	OCTBI	2683(CALMI)	OCTBI,CALMI	KQ420477:74805..435852	361047	OCTBI_Ocbimv22028357m.p,OCTBI_Ocbimv22028358m.p,OCTBI_Ocbimv22028361m.p,OCTBI_Ocbimv22028346m.p,OCTBI_Ocbimv22028349m.p,OCTBI_Ocbimv22028351m.p,OCTBI_Ocbimv22028352m.p,OCTBI_Ocbimv22028353m.p,OCTBI_Ocbimv22028354m.p,OCTBI_Ocbimv22028356m.p,OCTBI_Ocbimv22028363m.p,OCTBI_Ocbimv22028364m.p
3616	CALMI	3615(OCTBI)	CALMI,OCTBI	oct000674F:409850..506530	96680	CALMI_Omin003953p,CALMI_Omin003952p,CALMI_Omin003950p
14400	EUPSC	3402(OCTBI)	EUPSC,CALMI,OCTBI	Lachesis_group5__70_contigs__length_158228327:42779492..43121911	342419	EUPSC_cluster_28331,EUPSC_cluster_11514,EUPSC_cluster_8566	; PF02179 BAG domain-PF00240 Ubiquitin family;
14536	EUPSC	14537(OCTBI)	EUPSC,OCTBI	Lachesis_group42__34_contigs__length_44581599:10922116..11096409	174293	EUPSC_cluster_2021,EUPSC_cluster_26142,EUPSC_cluster_567	PF00164 Ribosomal protein S12/S23; PF12796 Ankyrin repeats (3 copies); PF13847 Methyltransferase domain
2734	OCTBI	2740(CALMI),4241(EUPSC),2733(CALMI)	OCTBI,CALMI,EUPSC	KQ427290:9847..165376	155529	OCTBI_Ocbimv22010154m.p,OCTBI_Ocbimv22010156m.p,OCTBI_Ocbimv22010157m.p,OCTBI_Ocbimv22010158m.p,OCTBI_Ocbimv22010159m.p,OCTBI_Ocbimv22010160m.p
4509	CALMI	4207(EUPSC)	EUPSC,CALMI	oct004795F:19125..222706	203581	CALMI_Omin008129p,CALMI_Omin008128p,CALMI_Omin008124p
14057	EUPSC	14058(OCTBI)	OCTBI,EUPSC	Lachesis_group5__70_contigs__length_158228327:1586045..2106463	520418	EUPSC_cluster_15395,EUPSC_cluster_25885,EUPSC_cluster_2502,EUPSC_cluster_4076,EUPSC_cluster_4163,EUPSC_cluster_5153,EUPSC_cluster_25883	PF13472 GDSL-like Lipase/Acylhydrolase family; PF13520 Amino acid permease; PF03372 Endonuclease/Exonuclease/phosphatase family; PF00567 Tudor domain-PF00567 Tudor domain-PF00270 DEAD/DEAH box helicase-PF04969 CS domain; PF01873 Domain found in IF2B/IF5; PF01428 AN1-like Zinc finger-PF01428 AN1-like Zinc finger;
2560	CALMI	2561(OCTBI)	CALMI,OCTBI	oct002958F:126810..259911	133101	CALMI_Omin005988p,CALMI_Omin005987p,CALMI_Omin005990p
14384	EUPSC	14383(OCTBI)	EUPSC,OCTBI	Lachesis_group28__49_contigs__length_91470296:28824474..28898448	73974	EUPSC_cluster_21231,EUPSC_cluster_21229,EUPSC_cluster_21228	; ; PF08217 Fungal domain of unknown function (DUF1712)-PF08217 Fungal domain of unknown function (DUF1712)
2675	OCTBI	2676(CALMI)	CALMI,OCTBI	KQ416092:64922..93862	28940	OCTBI_Ocbimv22023598m.p,OCTBI_Ocbimv22023599m.p,OCTBI_Ocbimv22023600m.p
3202	CALMI	3201(OCTBI)	OCTBI,CALMI	oct004287F:24095..117543	93448	CALMI_Omin000919p,CALMI_Omin000920p,CALMI_Omin000922p
3483	OCTBI	3482(CALMI)	CALMI,OCTBI	KQ415990:796954..1391828	594874	OCTBI_Ocbimv22018197m.p,OCTBI_Ocbimv22018198m.p,OCTBI_Ocbimv22018200m.p,OCTBI_Ocbimv22018202m.p,OCTBI_Ocbimv22018204m.p
2516	OCTBI	2517(CALMI)	CALMI,OCTBI	KQ419192:614221..751434	137213	OCTBI_Ocbimv22022283m.p,OCTBI_Ocbimv22022286m.p,OCTBI_Ocbimv22022287m.p,OCTBI_Ocbimv22022288m.p,OCTBI_Ocbimv22022292m.p
4290	EUPSC	2518(OCTBI),2519(CALMI)	EUPSC,CALMI,OCTBI	Lachesis_group32__40_contigs__length_78634074:21127956..21891807	763851	EUPSC_cluster_23370,EUPSC_cluster_445,EUPSC_cluster_23371,EUPSC_cluster_12527,EUPSC_cluster_3370,EUPSC_cluster_19318	PF13621 Cupin-like domain; PF04177 TAP42-like family; PF04177 TAP42-like family; PF13233 Complex1_LYR-like; PF00498 FHA domain-PF00250 Forkhead domain;
13826	EUPSC	13825(OCTBI)	OCTBI,EUPSC	Lachesis_group29__46_contigs__length_89259793:6610113..6913394	303281	EUPSC_cluster_26725,EUPSC_cluster_26724,EUPSC_cluster_17932	PF13927 Immunoglobulin domain-PF00041 Fibronectin type III domain-PF00041 Fibronectin type III domain; PF07679 Immunoglobulin I-set domain; PF13927 Immunoglobulin domain-PF13927 Immunoglobulin domain-PF13927 Immunoglobulin domain
3643	CALMI	3644(OCTBI)	CALMI,OCTBI	oct001034F:60034..479549	419515	CALMI_Omin007289p,CALMI_Omin007290p,CALMI_Omin007291p
3660	CALMI	3659(OCTBI)	CALMI,OCTBI	oct006835F:25019..178697	153678	CALMI_Omin013084p,CALMI_Omin013085p,CALMI_Omin013086p
3575	CALMI	3576(OCTBI)	CALMI,OCTBI	oct027682F:3143..49621	46478	CALMI_Omin021243p,CALMI_Omin021241p,CALMI_Omin021242p
2819	OCTBI	2818(CALMI)	CALMI,OCTBI	KQ420017:566686..668200	101514	OCTBI_Ocbimv22026222m.p,OCTBI_Ocbimv22026223m.p,OCTBI_Ocbimv22026227m.p,OCTBI_Ocbimv22026228m.p,OCTBI_Ocbimv22026229m.p
3352	OCTBI	4265(EUPSC),3353(CALMI)	EUPSC,OCTBI,CALMI	KQ420886:651..30310	29659	OCTBI_Ocbimv22030023m.p,OCTBI_Ocbimv22030024m.p,OCTBI_Ocbimv22030025m.p
3790	CALMI	3791(OCTBI),4188(EUPSC)	OCTBI,CALMI,EUPSC	oct014904F:27297..53680	26383	CALMI_Omin028566p,CALMI_Omin028569p,CALMI_Omin028568p
2840	CALMI	2839(OCTBI)	OCTBI,CALMI	oct006463F:69917..156831	86914	CALMI_Omin014573p,CALMI_Omin014572p,CALMI_Omin014571p
3828	OCTBI	3827(CALMI)	CALMI,OCTBI	KQ418598:370723..416568	45845	OCTBI_Ocbimv22018298m.p,OCTBI_Ocbimv22018299m.p,OCTBI_Ocbimv22018301m.p
14584	EUPSC	14585(OCTBI)	OCTBI,EUPSC	Lachesis_group35__42_contigs__length_70637049:39570874..39671873	100999	EUPSC_cluster_10800,EUPSC_cluster_2343,EUPSC_cluster_16666	PF17065 Putative cytokine, C6ORF120; PF00782 Dual specificity phosphatase, catalytic domain; PF00008 EGF-like domain-PF00008 EGF-like domain-PF00008 EGF-like domain-PF00008 EGF-like domain-PF00008 EGF-like domain-PF00008 EGF-like domain-PF00008 EGF-like domain-PF00008 EGF-like domain-PF00008 EGF-like domain-PF00008 EGF-like domain-PF12661 Human growth factor-like EGF-PF12661 Human growth factor-l…
2721	OCTBI	2722(CALMI)	CALMI,OCTBI,EUPSC	KQ417949:5789..70675	64886	OCTBI_Ocbimv22012889m.p,OCTBI_Ocbimv22012891m.p,OCTBI_Ocbimv22012892m.p,OCTBI_Ocbimv22012893m.p
14040	OCTBI	14039(EUPSC)	OCTBI,EUPSC	KQ416547:120387..257536	137149	OCTBI_Ocbimv22034699m.p,OCTBI_Ocbimv22034700m.p,OCTBI_Ocbimv22034702m.p,OCTBI_Ocbimv22034703m.p,OCTBI_Ocbimv22034704m.p,OCTBI_Ocbimv22034705m.p
14134	OCTBI	14135(EUPSC)	EUPSC,OCTBI	KQ418431:748094..935275	187181	OCTBI_Ocbimv22016986m.p,OCTBI_Ocbimv22016987m.p,OCTBI_Ocbimv22016988m.p,OCTBI_Ocbimv22016989m.p,OCTBI_Ocbimv22016991m.p,OCTBI_Ocbimv22016992m.p,OCTBI_Ocbimv22016994m.p,OCTBI_Ocbimv22016995m.p
14087	OCTBI	14088(EUPSC)	EUPSC,OCTBI	KQ419803:9099..97716	88617	OCTBI_Ocbimv22025446m.p,OCTBI_Ocbimv22025447m.p,OCTBI_Ocbimv22025448m.p,OCTBI_Ocbimv22025449m.p,OCTBI_Ocbimv22025450m.p
4454	CALMI	4229(EUPSC)	OCTBI,CALMI,EUPSC	oct008656F:21513..129019	107506	CALMI_Omin011339p,CALMI_Omin011340p,CALMI_Omin011338p
13869	EUPSC	2527(OCTBI)	EUPSC,OCTBI,CALMI	Lachesis_group6__62_contigs__length_156955521:114572208..114947719	375511	EUPSC_cluster_3478,EUPSC_cluster_143,EUPSC_cluster_28510	PF00483 Nucleotidyl transferase; PF15870 ElonginA binding-protein 1-PF15870 ElonginA binding-protein 1; PF03828 Cid1 family poly A polymerase-PF03828 Cid1 family poly A polymerase-PF01909 Nucleotidyltransferase domain
14039	EUPSC	14040(OCTBI)	EUPSC,OCTBI	Lachesis_group25__42_contigs__length_94613958:40041639..40480081	438442	EUPSC_cluster_9275,EUPSC_cluster_5069,EUPSC_cluster_11359,EUPSC_cluster_18766,EUPSC_cluster_9074	PF07910 Peptidase family C78; PF12260 Protein-kinase domain of FAM69-PF14875 N-term cysteine-rich ER, FAM69; PF00702 haloacid dehalogenase-like hydrolase-PF00122 E1-E2 ATPase; PF00538 linker histone H1 and H5 family; PF00538 linker histone H1 and H5 family
14354	OCTBI	14355(EUPSC)	OCTBI,EUPSC	KQ425537:196417..310107	113690	OCTBI_Ocbimv22005167m.p,OCTBI_Ocbimv22005169m.p,OCTBI_Ocbimv22005170m.p
14427	OCTBI	14426(EUPSC)	EUPSC,OCTBI	KQ418740:224059..387836	163777	OCTBI_Ocbimv22019276m.p,OCTBI_Ocbimv22019277m.p,OCTBI_Ocbimv22019279m.p
4421	EUPSC	4422(CALMI)	EUPSC,CALMI	Lachesis_group17__52_contigs__length_118315660:59001396..60184240	1182844	EUPSC_cluster_9552,EUPSC_cluster_4735,EUPSC_cluster_20658,EUPSC_cluster_8111,EUPSC_cluster_29089	; PF00350 Dynamin family; PF04056 Ssl1-like; PF15082 Domain of unknown function (DUF4549); PF12494 Protein of unknown function (DUF3695)
3585	CALMI	3586(OCTBI),4482(EUPSC)	EUPSC,CALMI,OCTBI	oct004359F:97121..208563	111442	CALMI_Omin008068p,CALMI_Omin008069p,CALMI_Omin008070p,CALMI_Omin008067p
13812	EUPSC	13811(OCTBI)	OCTBI,EUPSC	Lachesis_group10__55_contigs__length_138218214:1097068..1607892	510824	EUPSC_cluster_25447,EUPSC_cluster_29064,EUPSC_cluster_9263,EUPSC_cluster_25446,EUPSC_cluster_5722,EUPSC_cluster_25445,EUPSC_cluster_25444,EUPSC_cluster_25443	PF03417 Acyl-coenzyme A:6-aminopenicillanic acid acyl-transferase; PF03417 Acyl-coenzyme A:6-aminopenicillanic acid acyl-transferase; PF02089 Palmitoyl protein thioesterase; ; ; ; ;
2754	CALMI	2753(OCTBI)	CALMI,OCTBI	oct001228F:70251..297733	227482	CALMI_Omin005219p,CALMI_Omin005215p,CALMI_Omin005216p,CALMI_Omin005214p
14088	EUPSC	14087(OCTBI)	OCTBI,EUPSC	Lachesis_group1__63_contigs__length_187967259:163523498..163967013	443515	EUPSC_cluster_11005,EUPSC_cluster_17733,EUPSC_cluster_1482,EUPSC_cluster_8519,EUPSC_cluster_1748,EUPSC_cluster_17730	PF14580 Leucine-rich repeat; PF14580 Leucine-rich repeat; ; PF12796 Ankyrin repeats (3 copies)-PF12796 Ankyrin repeats (3 copies); PF02751 Transcription initiation factor IIA, gamma subunit-PF02268 Transcription initiation factor IIA, gamma subunit, helical domain; PF01476 LysM domain
14125	EUPSC	14124(OCTBI)	OCTBI,EUPSC	Lachesis_group4__56_contigs__length_174030884:162527547..163408976	881429	EUPSC_cluster_1069,EUPSC_cluster_6196,EUPSC_cluster_25181	PF00581 Rhodanese-like domain-PF00782 Dual specificity phosphatase, catalytic domain; ; PF12012 Domain of unknown function (DUF3504)
2642	CALMI	2643(OCTBI)	CALMI,OCTBI,EUPSC	oct007234F:42993..177989	134996	CALMI_Omin016090p,CALMI_Omin016092p,CALMI_Omin016091p
14573	EUPSC	14574(OCTBI)	EUPSC,OCTBI	Lachesis_group13__58_contigs__length_132030582:89991941..90348457	356516	EUPSC_cluster_23424,EUPSC_cluster_1238,EUPSC_cluster_1239	PF10165 Guanine nucleotide exchange factor synembryn-PF10165 Guanine nucleotide exchange factor synembryn; ;
3696	CALMI	4367(EUPSC)	CALMI,OCTBI,EUPSC	oct012583F:5795..95685	89890	CALMI_Omin023750p,CALMI_Omin023751p,CALMI_Omin023749p,CALMI_Omin023752p
2608	CALMI	2607(OCTBI)	OCTBI,CALMI	oct005079F:2033..86999	84966	CALMI_Omin015590p,CALMI_Omin015587p,CALMI_Omin015588p
3647	CALMI	3648(OCTBI)	OCTBI,CALMI	oct001000F:21447..508292	486845	CALMI_Omin008755p,CALMI_Omin008753p,CALMI_Omin008750p,CALMI_Omin008751p,CALMI_Omin008749p
4266	CALMI	4207(EUPSC)	EUPSC,CALMI	oct014881F:10..41705	41695	CALMI_Omin026063p,CALMI_Omin026062p,CALMI_Omin026061p
13928	EUPSC	13929(OCTBI)	EUPSC,OCTBI	Lachesis_group11__73_contigs__length_131769366:46318410..46682115	363705	EUPSC_cluster_9039,EUPSC_cluster_19592,EUPSC_cluster_8407	PF00046 Homeobox domain-PF03798 TLC domain; PF00570 HRDC domain-PF09382 RQC domain-PF00270 DEAD/DEAH box helicase-PF00271 Helicase conserved C-terminal domain-PF16124 RecQ zinc-binding;
3631	OCTBI	3630(CALMI)	CALMI,OCTBI	KQ429530:111848..161716	49868	OCTBI_Ocbimv22015734m.p,OCTBI_Ocbimv22015735m.p,OCTBI_Ocbimv22015737m.p,OCTBI_Ocbimv22015738m.p
13922	OCTBI	13923(EUPSC)	OCTBI,EUPSC	KQ417731:154835..227541	72706	OCTBI_Ocbimv22010984m.p,OCTBI_Ocbimv22010985m.p,OCTBI_Ocbimv22010986m.p,OCTBI_Ocbimv22010988m.p
14422	EUPSC	14423(OCTBI)	EUPSC,OCTBI	Lachesis_group12__46_contigs__length_133395132:127987367..128233530	246163	EUPSC_cluster_24452,EUPSC_cluster_7826,EUPSC_cluster_9046	PF04178 Got1/Sft2-like family; PF00069 Protein kinase domain; PF00412 LIM domain-PF00412 LIM domain-PF00412 LIM domain-PF00412 LIM domain-PF00412 LIM domain
14416	EUPSC	14415(OCTBI)	OCTBI,EUPSC	Lachesis_group34__47_contigs__length_76047342:15384255..15657283	273028	EUPSC_cluster_11119,EUPSC_cluster_6802,EUPSC_cluster_4355,EUPSC_cluster_26819,EUPSC_cluster_22071	PF00339 Arrestin (or S-antigen), N-terminal domain-PF02752 Arrestin (or S-antigen), C-terminal domain; PF08372 Plant phosphoribosyltransferase C-terminal-PF00168 C2 domain-PF00168 C2 domain-PF00168 C2 domain; PF03256 Anaphase-promoting complex, subunit 10 (APC10); PF00339 Arrestin (or S-antigen), N-terminal domain; PF00168 C2 domain
13855	EUPSC	13854(OCTBI)	EUPSC,OCTBI	Lachesis_group29__46_contigs__length_89259793:72392904..72632319	239415	EUPSC_cluster_3502,EUPSC_cluster_22435,EUPSC_cluster_22437,EUPSC_cluster_6369	PF01597 Glycine cleavage H-protein; PF08356 EF hand associated-PF08355 EF hand associated-PF00071 Ras family; PF00071 Ras family; PF13671 AAA domain-PF08645 Polynucleotide kinase 3 phosphatase
3211	OCTBI	3210(CALMI)	CALMI,OCTBI	KQ415788:152273..382009	229736	OCTBI_Ocbimv22002123m.p,OCTBI_Ocbimv22002124m.p,OCTBI_Ocbimv22002125m.p,OCTBI_Ocbimv22002126m.p,OCTBI_Ocbimv22002128m.p,OCTBI_Ocbimv22002129m.p
13916	EUPSC	13917(OCTBI)	OCTBI,EUPSC	Lachesis_group39__38_contigs__length_50967332:29687601..29743943	56342	EUPSC_cluster_4978,EUPSC_cluster_13650,EUPSC_cluster_13582	PF14972 Mitochondrial morphogenesis regulator; ;
3129	CALMI	3130(OCTBI)	CALMI,OCTBI	oct001971F:270614..352159	81545	CALMI_Omin004567p,CALMI_Omin004564p,CALMI_Omin004566p
14209	EUPSC	14208(OCTBI)	EUPSC,OCTBI	Lachesis_group19__43_contigs__length_108131866:44525247..44934285	409038	EUPSC_cluster_4427,EUPSC_cluster_26589,EUPSC_cluster_1654,EUPSC_cluster_26587	PF01363 FYVE zinc finger-PF04784 Protein of unknown function, DUF547; PF05380 Pao retrotransposon peptidase; PF00241 Cofilin/tropomyosin-type actin-binding protein;
14079	OCTBI	14080(EUPSC)	OCTBI,EUPSC	KQ422340:51915..171255	119340	OCTBI_Ocbimv22035242m.p,OCTBI_Ocbimv22035243m.p,OCTBI_Ocbimv22035244m.p
2551	OCTBI	2552(CALMI)	OCTBI,CALMI	KQ430417:21383..66550	45167	OCTBI_Ocbimv22017681m.p,OCTBI_Ocbimv22017684m.p,OCTBI_Ocbimv22017687m.p
14376	EUPSC	14375(OCTBI)	EUPSC,OCTBI	Lachesis_group21__43_contigs__length_103963499:74554796..74683287	128491	EUPSC_cluster_5282,EUPSC_cluster_14204,EUPSC_cluster_24669,EUPSC_cluster_4027	PF00428 60s Acidic ribosomal protein-PF00466 Ribosomal protein L10; PF00004 ATPase family associated with various cellular activities (AAA)-PF00004 ATPase family associated with various cellular activities (AAA); PF00078 Reverse transcriptase (RNA-dependent DNA polymerase)-PF13843 Transposase IS4-PF15190 Transmembrane protein 251; PF00156 Phosphoribosyl transferase domain
2524	CALMI	2525(OCTBI)	CALMI,OCTBI	oct004624F:104705..249117	144412	CALMI_Omin003379p,CALMI_Omin003377p,CALMI_Omin003380p
3505	CALMI	4211(EUPSC),3504(OCTBI)	CALMI,OCTBI,EUPSC	oct012244F:6894..106592	99698	CALMI_Omin028623p,CALMI_Omin028620p,CALMI_Omin028621p,CALMI_Omin028622p,CALMI_Omin028624p
4162	EUPSC	4161(CALMI)	EUPSC,CALMI	Lachesis_group23__35_contigs__length_97660015:59046257..59734361	688104	EUPSC_cluster_22944,EUPSC_cluster_22942,EUPSC_cluster_22941,EUPSC_cluster_27852,EUPSC_cluster_27853	PF02913 FAD linked oxidases, C-terminal domain; PF01565 FAD binding domain; PF02913 FAD linked oxidases, C-terminal domain; PF02210 Laminin G domain; PF00019 Transforming growth factor beta like domain-PF00688 TGF-beta propeptide
14174	EUPSC	3162(OCTBI)	CALMI,OCTBI,EUPSC	Lachesis_group1__63_contigs__length_187967259:36466097..36637111	171014	EUPSC_cluster_4578,EUPSC_cluster_15833,EUPSC_cluster_5505	PF00400 WD domain, G-beta repeat-PF00400 WD domain, G-beta repeat-PF00400 WD domain, G-beta repeat-PF00400 WD domain, G-beta repeat-PF00400 WD domain, G-beta repeat; PF00531 Death domain-PF00069 Protein kinase domain; PF00728 Glycosyl hydrolase family 20, catalytic domain-PF14845 beta-acetyl hexosaminidase like
3464	CALMI	3463(OCTBI)	CALMI,OCTBI	oct005371F:3567..172133	168566	CALMI_Omin010933p,CALMI_Omin010936p,CALMI_Omin010934p,CALMI_Omin010935p
2965	CALMI	2966(OCTBI)	CALMI,OCTBI	oct004251F:4256..189113	184857	CALMI_Omin002225p,CALMI_Omin002226p,CALMI_Omin002224p,CALMI_Omin002223p
3376	OCTBI	3377(CALMI)	OCTBI,CALMI	KQ418295:73558..107544	33986	OCTBI_Ocbimv22015805m.p,OCTBI_Ocbimv22015809m.p,OCTBI_Ocbimv22015810m.p,OCTBI_Ocbimv22015811m.p
3477	OCTBI	3478(CALMI)	CALMI,OCTBI	KQ415895:294704..591814	297110	OCTBI_Ocbimv22011966m.p,OCTBI_Ocbimv22011969m.p,OCTBI_Ocbimv22011972m.p,OCTBI_Ocbimv22011973m.p
14058	OCTBI	14057(EUPSC)	EUPSC,OCTBI	KQ420942:90827..310814	219987	OCTBI_Ocbimv22030298m.p,OCTBI_Ocbimv22030300m.p,OCTBI_Ocbimv22030302m.p,OCTBI_Ocbimv22030303m.p,OCTBI_Ocbimv22030304m.p,OCTBI_Ocbimv22030305m.p,OCTBI_Ocbimv22030307m.p
3651	CALMI	4415(EUPSC)	OCTBI,CALMI,EUPSC	oct010911F:94..88584	88490	CALMI_Omin028199p,CALMI_Omin028201p,CALMI_Omin028200p
2605	OCTBI	2604(CALMI)	OCTBI,CALMI	KQ425131:17419..103393	85974	OCTBI_Ocbimv22003854m.p,OCTBI_Ocbimv22003855m.p,OCTBI_Ocbimv22003856m.p
2884	OCTBI	2885(CALMI)	OCTBI,CALMI	KQ428859:23393..71227	47834	OCTBI_Ocbimv22014307m.p,OCTBI_Ocbimv22014309m.p,OCTBI_Ocbimv22014310m.p
3624	CALMI	4131(EUPSC),3625(OCTBI)	OCTBI,CALMI,EUPSC	oct009615F:6351..93094	86743	CALMI_Omin013412p,CALMI_Omin013414p,CALMI_Omin013413p
2472	CALMI	2471(OCTBI)	OCTBI,CALMI	oct003650F:12267..146552	134285	CALMI_Omin005668p,CALMI_Omin005670p,CALMI_Omin005667p
13885	OCTBI	13884(EUPSC)	OCTBI,EUPSC	KQ420065:210456..316597	106141	OCTBI_Ocbimv22026535m.p,OCTBI_Ocbimv22026537m.p,OCTBI_Ocbimv22026538m.p
3710	OCTBI	3709(CALMI)	CALMI,OCTBI	KQ422401:151172..242545	91373	OCTBI_Ocbimv22035481m.p,OCTBI_Ocbimv22035482m.p,OCTBI_Ocbimv22035484m.p,OCTBI_Ocbimv22035486m.p
2899	OCTBI	2900(CALMI)	OCTBI,CALMI	KQ416877:233268..331391	98123	OCTBI_Ocbimv22000701m.p,OCTBI_Ocbimv22000704m.p,OCTBI_Ocbimv22000708m.p
3386	OCTBI	3385(CALMI),4255(EUPSC)	CALMI,OCTBI,EUPSC	KQ421725:51..33317	33266	OCTBI_Ocbimv22033087m.p,OCTBI_Ocbimv22033088m.p,OCTBI_Ocbimv22033091m.p,OCTBI_Ocbimv22033092m.p
3749	OCTBI	3750(CALMI)	CALMI,OCTBI	KQ418789:362618..611841	249223	OCTBI_Ocbimv22019629m.p,OCTBI_Ocbimv22019644m.p,OCTBI_Ocbimv22019645m.p
3542	CALMI	3543(OCTBI)	OCTBI,CALMI	oct004588F:3232..147092	143860	CALMI_Omin001794p,CALMI_Omin001793p,CALMI_Omin001795p
3487	OCTBI	3486(CALMI)	OCTBI,CALMI	KQ421356:60332..150111	89779	OCTBI_Ocbimv22031822m.p,OCTBI_Ocbimv22031823m.p,OCTBI_Ocbimv22031827m.p
2547	CALMI	4449(EUPSC),2548(OCTBI)	CALMI,OCTBI,EUPSC	oct004406F:46957..231740	184783	CALMI_Omin009786p,CALMI_Omin009784p,CALMI_Omin009785p
3403	OCTBI	4360(EUPSC),3404(CALMI)	EUPSC,CALMI,OCTBI	KQ426791:658237..720645	62408	OCTBI_Ocbimv22008883m.p,OCTBI_Ocbimv22008885m.p,OCTBI_Ocbimv22008886m.p,OCTBI_Ocbimv22008887m.p,OCTBI_Ocbimv22008882m.p
2959	OCTBI	2958(CALMI)	CALMI,OCTBI	KQ418003:123..415659	415536	OCTBI_Ocbimv22013233m.p,OCTBI_Ocbimv22013234m.p,OCTBI_Ocbimv22013235m.p,OCTBI_Ocbimv22013236m.p,OCTBI_Ocbimv22013237m.p,OCTBI_Ocbimv22013241m.p,OCTBI_Ocbimv22013239m.p,OCTBI_Ocbimv22013240m.p,OCTBI_Ocbimv22013244m.p
3923	CALMI	3924(OCTBI)	CALMI,OCTBI	oct005068F:45449..130312	84863	CALMI_Omin010574p,CALMI_Omin010576p,CALMI_Omin010575p
2482	OCTBI	2481(CALMI)	CALMI,OCTBI	KQ423680:201555..219288	17733	OCTBI_Ocbimv22039507m.p,OCTBI_Ocbimv22039508m.p,OCTBI_Ocbimv22039509m.p
3176	CALMI	4495(EUPSC),3175(OCTBI)	OCTBI,CALMI,EUPSC	oct000783F:79310..561014	481704	CALMI_Omin010109p,CALMI_Omin010107p,CALMI_Omin010110p,CALMI_Omin010108p,CALMI_Omin010112p
14576	EUPSC	14575(OCTBI)	EUPSC,OCTBI	Lachesis_group3__52_contigs__length_175295898:27264583..30009567	2744984	EUPSC_cluster_251,EUPSC_cluster_2852,EUPSC_cluster_22265,EUPSC_cluster_4680,EUPSC_cluster_9037,EUPSC_cluster_531	PF01426 BAH domain-PF00439 Bromodomain-PF00856 SET domain; PF10236 Mitochondrial ribosomal death-associated protein 3; PF10236 Mitochondrial ribosomal death-associated protein 3; PF02607 B12 binding domain-PF02574 Homocysteine S-methyltransferase-PF02574 Homocysteine S-methyltransferase-PF02965 Vitamin B12 dependent methionine synthase, activation domain-PF02965 Vitamin B12 dependent methionine s…
2531	OCTBI	2530(CALMI)	OCTBI,CALMI	KQ420924:85282..134268	48986	OCTBI_Ocbimv22030202m.p,OCTBI_Ocbimv22030204m.p,OCTBI_Ocbimv22030205m.p
2874	CALMI	2873(OCTBI)	CALMI,OCTBI	oct015222F:9610..72120	62510	CALMI_Omin020157p,CALMI_Omin020156p,CALMI_Omin020155p,CALMI_Omin020154p
2968	OCTBI	3874(CALMI),2967(CALMI)	CALMI,OCTBI	KQ416408:48287..117202	68915	OCTBI_Ocbimv22031791m.p,OCTBI_Ocbimv22031793m.p,OCTBI_Ocbimv22031795m.p
3251	OCTBI	3252(CALMI)	OCTBI,CALMI	KQ419877:35134..126978	91844	OCTBI_Ocbimv22025653m.p,OCTBI_Ocbimv22025654m.p,OCTBI_Ocbimv22025657m.p
4230	EUPSC	2887(OCTBI),2886(CALMI)	EUPSC,CALMI,OCTBI	Lachesis_group30__51_contigs__length_87052432:46943814..47909008	965194	EUPSC_cluster_21439,EUPSC_cluster_16412,EUPSC_cluster_14728,EUPSC_cluster_11577,EUPSC_cluster_13872,EUPSC_cluster_21441,EUPSC_cluster_13143,EUPSC_cluster_13239,EUPSC_cluster_4287	PF02121 Phosphatidylinositol transfer protein; PF02121 Phosphatidylinositol transfer protein; PF02121 Phosphatidylinositol transfer protein; PF13837 Myb/SANT-like DNA-binding domain-PF02017 CIDE-N domain; PF02017 CIDE-N domain-PF09033 DNA Fragmentation factor 45kDa, C terminal domain; PF13359 DDE superfamily endonuclease; PF13359 DDE superfamily endonuclease; PF04695 Peroxisomal membrane anchor p…
2677	OCTBI	4195(EUPSC),3852(CALMI)	EUPSC,CALMI,OCTBI	KQ418873:189088..603790	414702	OCTBI_Ocbimv22020196m.p,OCTBI_Ocbimv22020198m.p,OCTBI_Ocbimv22020199m.p,OCTBI_Ocbimv22020201m.p,OCTBI_Ocbimv22020202m.p,OCTBI_Ocbimv22020205m.p,OCTBI_Ocbimv22020207m.p,OCTBI_Ocbimv22020212m.p,OCTBI_Ocbimv22020213m.p,OCTBI_Ocbimv22020195m.p
3672	CALMI	3671(OCTBI)	CALMI,OCTBI	oct015776F:1419..43018	41599	CALMI_Omin018848p,CALMI_Omin018847p,CALMI_Omin018849p
3730	OCTBI	4268(EUPSC),3731(CALMI)	EUPSC,CALMI,OCTBI	KQ417497:65488..694825	629337	OCTBI_Ocbimv22008322m.p,OCTBI_Ocbimv22008326m.p,OCTBI_Ocbimv22008327m.p,OCTBI_Ocbimv22008328m.p,OCTBI_Ocbimv22008320m.p
14207	OCTBI	9047(EUPSC)	EUPSC,OCTBI	KQ415823:274101..489319	215218	OCTBI_Ocbimv22005779m.p,OCTBI_Ocbimv22005783m.p,OCTBI_Ocbimv22005785m.p,OCTBI_Ocbimv22005786m.p
14077	EUPSC	14078(OCTBI)	OCTBI,EUPSC	Lachesis_group6__62_contigs__length_156955521:115277332..115589583	312251	EUPSC_cluster_3720,EUPSC_cluster_28514,EUPSC_cluster_3988,EUPSC_cluster_7081	PF00078 Reverse transcriptase (RNA-dependent DNA polymerase)-PF07690 Major Facilitator Superfamily-PF07690 Major Facilitator Superfamily; PF16087 Domain of unknown function (DUF4817); PF02815 MIR domain; PF14934 Domain of unknown function (DUF4499)
3224	CALMI	3225(OCTBI)	OCTBI,CALMI	oct003110F:20238..158056	137818	CALMI_Omin002297p,CALMI_Omin002296p,CALMI_Omin002295p
14574	OCTBI	14573(EUPSC)	EUPSC,OCTBI	KQ428981:92099..177651	85552	OCTBI_Ocbimv22014541m.p,OCTBI_Ocbimv22014544m.p,OCTBI_Ocbimv22014547m.p
3405	OCTBI	3406(CALMI)	CALMI,OCTBI	KQ415907:365612..393262	27650	OCTBI_Ocbimv22012321m.p,OCTBI_Ocbimv22012322m.p,OCTBI_Ocbimv22012324m.p
2904	CALMI	2903(OCTBI),4425(EUPSC)	CALMI,OCTBI,EUPSC	oct001721F:62610..389383	326773	CALMI_Omin002563p,CALMI_Omin002562p,CALMI_Omin002564p,CALMI_Omin002561p,CALMI_Omin002560p
14525	OCTBI	14524(EUPSC)	EUPSC,OCTBI	KQ415845:17849..520538	502689	OCTBI_Ocbimv22007626m.p,OCTBI_Ocbimv22007632m.p,OCTBI_Ocbimv22007633m.p,OCTBI_Ocbimv22007635m.p,OCTBI_Ocbimv22007637m.p,OCTBI_Ocbimv22007638m.p
3827	CALMI	3828(OCTBI)	CALMI,OCTBI	oct006213F:97873..190394	92521	CALMI_Omin011950p,CALMI_Omin011949p,CALMI_Omin011951p
13819	OCTBI	13820(EUPSC)	EUPSC,OCTBI	KQ421824:96429..571081	474652	OCTBI_Ocbimv22033524m.p,OCTBI_Ocbimv22033525m.p,OCTBI_Ocbimv22033530m.p
3800	OCTBI	3801(CALMI),14186(EUPSC)	OCTBI,CALMI,EUPSC	KQ417304:164211..211289	47078	OCTBI_Ocbimv22006213m.p,OCTBI_Ocbimv22006214m.p,OCTBI_Ocbimv22006216m.p,OCTBI_Ocbimv22006212m.p
14173	EUPSC	14172(OCTBI)	OCTBI,EUPSC	Lachesis_group25__42_contigs__length_94613958:86996139..87194256	198117	EUPSC_cluster_622,EUPSC_cluster_2290,EUPSC_cluster_10190	PF01731 Arylesterase; PF08543 Phosphomethylpyrimidine kinase; PF00168 C2 domain
13868	EUPSC	13867(OCTBI)	OCTBI,EUPSC	Lachesis_group22__46_contigs__length_104782409:37362910..40073790	2710880	EUPSC_cluster_3743,EUPSC_cluster_3638,EUPSC_cluster_13478	; PF14646 MYCBP-associated protein family-PF00098 Zinc knuckle; PF16367 RNA recognition motif-PF16366 Cytoplasmic polyadenylation element-binding protein ZZ domain-PF16368 Cytoplasmic polyadenylation element-binding protein 1 N-terminus
13862	EUPSC	14325(OCTBI),13861(OCTBI)	EUPSC,OCTBI	Lachesis_group2__55_contigs__length_182973478:79404735..80215247	810512	EUPSC_cluster_9386,EUPSC_cluster_24625,EUPSC_cluster_2393,EUPSC_cluster_5145,EUPSC_cluster_5144	PF00664 ABC transporter transmembrane region-PF00664 ABC transporter transmembrane region-PF00005 ABC transporter-PF00005 ABC transporter; PF00005 ABC transporter; PF07995 Glucose / Sorbosone dehydrogenase; PF16499 Alpha galactosidase A-PF17450 Alpha galactosidase A C-terminal beta sandwich domain; PF17450 Alpha galactosidase A C-terminal beta sandwich domain-PF16499 Alpha galactosidase A
4426	EUPSC	3142(CALMI)	EUPSC,CALMI	Lachesis_group1__63_contigs__length_187967259:87239651..87292685	53034	EUPSC_cluster_9663,EUPSC_cluster_17915,EUPSC_cluster_9199	PF13532 2OG-Fe(II) oxygenase superfamily; ; PF04884 Vitamin B6 photo-protection and homoeostasis
3682	CALMI	3683(OCTBI)	CALMI,OCTBI	oct000316F:221737..695436	473699	CALMI_Omin007803p,CALMI_Omin007805p,CALMI_Omin007807p
2603	OCTBI	2602(CALMI)	CALMI,OCTBI	KQ428165:148030..205703	57673	OCTBI_Ocbimv22012461m.p,OCTBI_Ocbimv22012462m.p,OCTBI_Ocbimv22012464m.p,OCTBI_Ocbimv22012465m.p
4327	EUPSC	2503(CALMI),2504(OCTBI)	EUPSC,CALMI,OCTBI	Lachesis_group14__44_contigs__length_129294686:128886227..129022796	136569	EUPSC_cluster_3521,EUPSC_cluster_8055,EUPSC_cluster_11733	PF00005 ABC transporter-PF00664 ABC transporter transmembrane region; ; PF00829 Ribosomal prokaryotic L21 protein
4300	CALMI	4299(EUPSC)	CALMI,EUPSC	oct015476F:6921..94315	87394	CALMI_Omin016810p,CALMI_Omin016813p,CALMI_Omin016811p,CALMI_Omin016808p,CALMI_Omin016809p,CALMI_Omin016815p,CALMI_Omin016812p,CALMI_Omin016814p
3442	OCTBI	2775(CALMI),4469(EUPSC),3443(CALMI)	OCTBI,CALMI,EUPSC	KQ425015:40008..189897	149889	OCTBI_Ocbimv22003447m.p,OCTBI_Ocbimv22003448m.p,OCTBI_Ocbimv22003449m.p,OCTBI_Ocbimv22003451m.p,OCTBI_Ocbimv22003452m.p,OCTBI_Ocbimv22003454m.p,OCTBI_Ocbimv22003457m.p,OCTBI_Ocbimv22003458m.p
3392	CALMI	3833(OCTBI)	CALMI,OCTBI	oct001414F:35517..431655	396138	CALMI_Omin010293p,CALMI_Omin010296p,CALMI_Omin010298p,CALMI_Omin010290p,CALMI_Omin010289p,CALMI_Omin010297p,CALMI_Omin010292p,CALMI_Omin010291p,CALMI_Omin010294p,CALMI_Omin010295p
13914	OCTBI	13915(EUPSC)	EUPSC,OCTBI	KQ416986:150826..278721	127895	OCTBI_Ocbimv22002102m.p,OCTBI_Ocbimv22002105m.p,OCTBI_Ocbimv22002107m.p
3750	CALMI	3749(OCTBI)	OCTBI,CALMI	oct002590F:40922..290155	249233	CALMI_Omin000563p,CALMI_Omin000562p,CALMI_Omin000564p
14220	OCTBI	14219(EUPSC)	EUPSC,OCTBI	KQ417345:135455..485082	349627	OCTBI_Ocbimv22006734m.p,OCTBI_Ocbimv22006735m.p,OCTBI_Ocbimv22006738m.p,OCTBI_Ocbimv22006739m.p,OCTBI_Ocbimv22006740m.p,OCTBI_Ocbimv22006741m.p
3587	CALMI	2847(OCTBI)	CALMI,OCTBI	oct035758F:5240..22374	17134	CALMI_Omin029968p,CALMI_Omin029970p,CALMI_Omin029969p
14374	EUPSC	2562(OCTBI)	EUPSC,CALMI,OCTBI	Lachesis_group13__58_contigs__length_132030582:61542710..62007225	464515	EUPSC_cluster_433,EUPSC_cluster_21275,EUPSC_cluster_21273,EUPSC_cluster_8667	PF01399 PCI domain; PF00728 Glycosyl hydrolase family 20, catalytic domain; ; PF00487 Fatty acid desaturase
14261	OCTBI	10164(EUPSC)	OCTBI,EUPSC	KQ415811:300318..1540652	1240334	OCTBI_Ocbimv22005001m.p,OCTBI_Ocbimv22005005m.p,OCTBI_Ocbimv22005007m.p,OCTBI_Ocbimv22005008m.p
3231	CALMI	3230(OCTBI),4368(EUPSC)	CALMI,OCTBI,EUPSC	oct001564F:2611..361885	359274	CALMI_Omin008028p,CALMI_Omin008027p,CALMI_Omin008025p,CALMI_Omin008026p,CALMI_Omin008029p
2963	CALMI	2964(OCTBI)	CALMI,OCTBI	oct002876F:3120..267984	264864	CALMI_Omin001467p,CALMI_Omin001471p,CALMI_Omin001470p,CALMI_Omin001469p
2919	OCTBI	4429(EUPSC),2920(CALMI)	CALMI,OCTBI,EUPSC	KQ421370:11753..118660	106907	OCTBI_Ocbimv22031874m.p,OCTBI_Ocbimv22031875m.p,OCTBI_Ocbimv22031876m.p,OCTBI_Ocbimv22031879m.p
14065	OCTBI	14064(EUPSC)	OCTBI,EUPSC	KQ420313:367273..629801	262528	OCTBI_Ocbimv22027599m.p,OCTBI_Ocbimv22027600m.p,OCTBI_Ocbimv22027603m.p
3928	CALMI	3929(OCTBI)	OCTBI,CALMI	oct002573F:132472..229964	97492	CALMI_Omin001323p,CALMI_Omin001322p,CALMI_Omin001321p,CALMI_Omin001324p
14176	EUPSC	14175(OCTBI)	EUPSC,OCTBI	Lachesis_group23__35_contigs__length_97660015:63430994..63832773	401779	EUPSC_cluster_1002,EUPSC_cluster_1003,EUPSC_cluster_1220	PF00246 Zinc carboxypeptidase; ; PF00810 ER lumen protein retaining receptor
2496	OCTBI	2495(CALMI)	CALMI,OCTBI	KQ423905:72766..176425	103659	OCTBI_Ocbimv22000244m.p,OCTBI_Ocbimv22000247m.p,OCTBI_Ocbimv22000250m.p,OCTBI_Ocbimv22000251m.p
3247	CALMI	3248(OCTBI),4377(EUPSC)	EUPSC,CALMI,OCTBI	oct003041F:17255..199108	181853	CALMI_Omin009132p,CALMI_Omin009137p,CALMI_Omin009129p,CALMI_Omin009135p,CALMI_Omin009130p,CALMI_Omin009136p
2789	OCTBI	4400(EUPSC)	EUPSC,OCTBI,CALMI	KQ417501:3434..253353	249919	OCTBI_Ocbimv22008424m.p,OCTBI_Ocbimv22008425m.p,OCTBI_Ocbimv22008429m.p,OCTBI_Ocbimv22008422m.p,OCTBI_Ocbimv22008430m.p,OCTBI_Ocbimv22008431m.p,OCTBI_Ocbimv22008433m.p
3844	CALMI	3845(OCTBI)	CALMI,OCTBI	oct003243F:13895..233176	219281	CALMI_Omin000605p,CALMI_Omin000611p,CALMI_Omin000609p,CALMI_Omin000607p,CALMI_Omin000610p,CALMI_Omin000606p,CALMI_Omin000613p,CALMI_Omin000604p
4479	EUPSC	4480(CALMI)	CALMI,EUPSC	Lachesis_group9__67_contigs__length_144638433:90390410..90704279	313869	EUPSC_cluster_24179,EUPSC_cluster_24181,EUPSC_cluster_8969	PF12624 N-terminal region of Chorein or VPS13; PF00665 Integrase core domain; PF00665 Integrase core domain
3301	OCTBI	3300(CALMI)	CALMI,OCTBI	KQ427524:15749..47508	31759	OCTBI_Ocbimv22010808m.p,OCTBI_Ocbimv22010810m.p,OCTBI_Ocbimv22010811m.p,OCTBI_Ocbimv22010812m.p
6612	OCTBI	14310(EUPSC)	OCTBI,EUPSC	KQ417510:566441..839851	273410	OCTBI_Ocbimv22008600m.p,OCTBI_Ocbimv22008601m.p,OCTBI_Ocbimv22008602m.p,OCTBI_Ocbimv22008603m.p,OCTBI_Ocbimv22008608m.p,OCTBI_Ocbimv22008609m.p,OCTBI_Ocbimv22008610m.p,OCTBI_Ocbimv22008611m.p
2794	CALMI	2793(OCTBI)	CALMI,OCTBI	oct004604F:9346..161920	152574	CALMI_Omin001752p,CALMI_Omin001753p,CALMI_Omin001754p,CALMI_Omin001755p
3577	OCTBI	3578(CALMI)	CALMI,OCTBI	KQ432284:143152..209915	66763	OCTBI_Ocbimv22021697m.p,OCTBI_Ocbimv22021698m.p,OCTBI_Ocbimv22021699m.p
2664	CALMI	4245(EUPSC),2665(OCTBI)	CALMI,OCTBI,EUPSC	oct000294F:247668..510834	263166	CALMI_Omin005437p,CALMI_Omin005436p,CALMI_Omin005435p,CALMI_Omin005432p
3000	OCTBI	3269(CALMI),3001(CALMI),1274(EUPSC)	OCTBI,CALMI,EUPSC	KQ420799:42268..342274	300006	OCTBI_Ocbimv22029667m.p,OCTBI_Ocbimv22029671m.p,OCTBI_Ocbimv22029673m.p,OCTBI_Ocbimv22029674m.p,OCTBI_Ocbimv22029665m.p,OCTBI_Ocbimv22029666m.p
3027	CALMI	3026(OCTBI)	OCTBI,CALMI	oct003373F:53827..178215	124388	CALMI_Omin002282p,CALMI_Omin002288p,CALMI_Omin002285p,CALMI_Omin002287p
2572	OCTBI	2571(CALMI)	CALMI,OCTBI	KQ418453:3929..63474	59545	OCTBI_Ocbimv22017124m.p,OCTBI_Ocbimv22017125m.p,OCTBI_Ocbimv22017127m.p,OCTBI_Ocbimv22017130m.p,OCTBI_Ocbimv22017131m.p
2779	CALMI	2778(OCTBI)	OCTBI,CALMI	oct008978F:17479..145412	127933	CALMI_Omin013693p,CALMI_Omin013692p,CALMI_Omin013691p
14325	OCTBI	13862(EUPSC)	EUPSC,OCTBI	KQ419216:200093..443826	243733	OCTBI_Ocbimv22022443m.p,OCTBI_Ocbimv22022444m.p,OCTBI_Ocbimv22022445m.p,OCTBI_Ocbimv22022448m.p
3192	CALMI	3320(OCTBI),4213(EUPSC)	OCTBI,CALMI,EUPSC	oct000802F:31351..566361	535010	CALMI_Omin009094p,CALMI_Omin009089p,CALMI_Omin009091p,CALMI_Omin009087p,CALMI_Omin009084p,CALMI_Omin009093p,CALMI_Omin009086p,CALMI_Omin009090p,CALMI_Omin009088p,CALMI_Omin009085p
4344	EUPSC	2467(OCTBI),2468(CALMI)	EUPSC,OCTBI,CALMI	Lachesis_group11__73_contigs__length_131769366:85538125..86071886	533761	EUPSC_cluster_777,EUPSC_cluster_2363,EUPSC_cluster_21208	PF00076 RNA recognition motif. (a.k.a. RRM, RBD, or RNP domain); PF07324 DiGeorge syndrome critical region 6 (DGCR6) protein; PF00012 Hsp70 protein
2967	CALMI	2968(OCTBI)	OCTBI,CALMI	oct000904F:360472..470165	109693	CALMI_Omin005732p,CALMI_Omin005731p,CALMI_Omin005730p
14586	EUPSC	14587(OCTBI)	OCTBI,EUPSC	Lachesis_group41__39_contigs__length_54644242:490126..1196380	706254	EUPSC_cluster_9374,EUPSC_cluster_3801,EUPSC_cluster_17723,EUPSC_cluster_9198,EUPSC_cluster_7380,EUPSC_cluster_8119	PF01803 LIM-domain binding protein-PF01803 LIM-domain binding protein; PF01553 Acyltransferase; PF05680 ATP synthase E chain; PF00076 RNA recognition motif. (a.k.a. RRM, RBD, or RNP domain); PF08616 Stabilization of polarity axis; PF00439 Bromodomain
3520	OCTBI	3521(CALMI)	CALMI,OCTBI	KQ416279:35..38626	38591	OCTBI_Ocbimv22028990m.p,OCTBI_Ocbimv22028991m.p,OCTBI_Ocbimv22028993m.p
14590	EUPSC	14589(OCTBI)	OCTBI,EUPSC	Lachesis_group10__55_contigs__length_138218214:28369539..28399515	29976	EUPSC_cluster_9733,EUPSC_cluster_8590,EUPSC_cluster_28760,EUPSC_cluster_3361	PF02466 Tim17/Tim22/Tim23/Pmp24 family; PF10178 Proteasome assembly chaperone 3; PF10178 Proteasome assembly chaperone 3; PF01302 CAP-Gly domain-PF01302 CAP-Gly domain-PF01302 CAP-Gly domain-PF12796 Ankyrin repeats (3 copies)
3371	CALMI	3370(OCTBI)	CALMI,OCTBI	oct006331F:16390..112735	96345	CALMI_Omin012737p,CALMI_Omin012739p,CALMI_Omin012738p,CALMI_Omin012740p
2548	OCTBI	2970(CALMI),4449(EUPSC),2547(CALMI)	EUPSC,OCTBI,CALMI	KQ418002:384776..467410	82634	OCTBI_Ocbimv22013225m.p,OCTBI_Ocbimv22013227m.p,OCTBI_Ocbimv22013230m.p,OCTBI_Ocbimv22013221m.p,OCTBI_Ocbimv22013224m.p
14136	OCTBI	4407(EUPSC)	EUPSC,OCTBI,CALMI	KQ428507:31984..142358	110374	OCTBI_Ocbimv22013438m.p,OCTBI_Ocbimv22013439m.p,OCTBI_Ocbimv22013440m.p
3243	CALMI	3244(OCTBI)	CALMI,OCTBI,EUPSC	oct014883F:11561..92788	81227	CALMI_Omin025686p,CALMI_Omin025685p,CALMI_Omin025684p
3488	CALMI	3489(OCTBI)	CALMI,OCTBI	oct005565F:14570..82341	67771	CALMI_Omin014356p,CALMI_Omin014354p,CALMI_Omin014355p
2709	CALMI	2710(OCTBI)	EUPSC,CALMI,OCTBI	oct015235F:2982..88192	85210	CALMI_Omin020271p,CALMI_Omin020270p,CALMI_Omin020272p
3583	OCTBI	3584(CALMI)	OCTBI,CALMI	KQ417623:250234..359424	109190	OCTBI_Ocbimv22009928m.p,OCTBI_Ocbimv22009929m.p,OCTBI_Ocbimv22009930m.p,OCTBI_Ocbimv22009932m.p
14334	EUPSC	14335(OCTBI)	EUPSC,OCTBI	Lachesis_group23__35_contigs__length_97660015:28677228..29037649	360421	EUPSC_cluster_14441,EUPSC_cluster_27975,EUPSC_cluster_5248	PF04991 LicD family; PF04991 LicD family;
14059	EUPSC	3774(OCTBI)	EUPSC,OCTBI,CALMI	Lachesis_group13__58_contigs__length_132030582:34019179..34099854	80675	EUPSC_cluster_810,EUPSC_cluster_353,EUPSC_cluster_5905	PF05603 Protein of unknown function (DUF775); PF07052 Hepatocellular carcinoma-associated antigen 59; PF00026 Eukaryotic aspartyl protease
14463	EUPSC	14464(OCTBI)	OCTBI,EUPSC	Lachesis_group34__47_contigs__length_76047342:49809148..49948290	139142	EUPSC_cluster_290,EUPSC_cluster_7661,EUPSC_cluster_5715	; PF06905 Fas apoptotic inhibitory molecule (FAIM1); PF00400 WD domain, G-beta repeat-PF00400 WD domain, G-beta repeat-PF00400 WD domain, G-beta repeat-PF00400 WD domain, G-beta repeat-PF00400 WD domain, G-beta repeat-PF00400 WD domain, G-beta repeat-PF04564 U-box domain-PF07647 SAM domain (Sterile alpha motif)
3962	CALMI	3961(OCTBI)	EUPSC,OCTBI,CALMI	oct010556F:40844..97388	56544	CALMI_Omin024918p,CALMI_Omin024917p,CALMI_Omin024921p
13963	OCTBI	13962(EUPSC)	OCTBI,EUPSC	KQ420166:15524..227774	212250	OCTBI_Ocbimv22027024m.p,OCTBI_Ocbimv22027026m.p,OCTBI_Ocbimv22027027m.p
3181	OCTBI	3182(CALMI)	OCTBI,CALMI	KQ426456:12564..172197	159633	OCTBI_Ocbimv22007770m.p,OCTBI_Ocbimv22007772m.p,OCTBI_Ocbimv22007775m.p,OCTBI_Ocbimv22007778m.p
13875	OCTBI	13876(EUPSC)	OCTBI,EUPSC	KQ421411:264884..508128	243244	OCTBI_Ocbimv22032029m.p,OCTBI_Ocbimv22032030m.p,OCTBI_Ocbimv22032031m.p,OCTBI_Ocbimv22032032m.p,OCTBI_Ocbimv22032033m.p,OCTBI_Ocbimv22032037m.p,OCTBI_Ocbimv22032038m.p
14141	OCTBI	14142(EUPSC)	OCTBI,EUPSC	KQ417824:705685..1027195	321510	OCTBI_Ocbimv22011713m.p,OCTBI_Ocbimv22011717m.p,OCTBI_Ocbimv22011718m.p
13824	OCTBI	1234(EUPSC)	EUPSC,OCTBI	KQ427350:10818..79491	68673	OCTBI_Ocbimv22010304m.p,OCTBI_Ocbimv22010307m.p,OCTBI_Ocbimv22010308m.p,OCTBI_Ocbimv22010309m.p
2839	OCTBI	2840(CALMI)	CALMI,OCTBI	KQ421325:402..21800	21398	OCTBI_Ocbimv22031706m.p,OCTBI_Ocbimv22031707m.p,OCTBI_Ocbimv22031708m.p
3381	CALMI	4130(EUPSC),3380(OCTBI)	EUPSC,CALMI,OCTBI	oct005138F:13885..190253	176368	CALMI_Omin014070p,CALMI_Omin014066p,CALMI_Omin014067p,CALMI_Omin014065p,CALMI_Omin014068p
14383	OCTBI	14384(EUPSC)	EUPSC,OCTBI	KQ428503:6173..152576	146403	OCTBI_Ocbimv22013424m.p,OCTBI_Ocbimv22013425m.p,OCTBI_Ocbimv22013427m.p
3645	OCTBI	4367(EUPSC),3646(CALMI)	EUPSC,OCTBI,CALMI	KQ417945:531031..971350	440319	OCTBI_Ocbimv22012851m.p,OCTBI_Ocbimv22012857m.p,OCTBI_Ocbimv22012858m.p,OCTBI_Ocbimv22012861m.p,OCTBI_Ocbimv22012863m.p,OCTBI_Ocbimv22012864m.p,OCTBI_Ocbimv22012844m.p,OCTBI_Ocbimv22012845m.p,OCTBI_Ocbimv22012846m.p,OCTBI_Ocbimv22012850m.p
2536	OCTBI	2535(CALMI)	CALMI,OCTBI	KQ426466:25377..182742	157365	OCTBI_Ocbimv22007827m.p,OCTBI_Ocbimv22007828m.p,OCTBI_Ocbimv22007830m.p,OCTBI_Ocbimv22007831m.p,OCTBI_Ocbimv22007832m.p
14553	EUPSC	14554(OCTBI)	EUPSC,OCTBI	Lachesis_group42__34_contigs__length_44581599:1575928..2117020	541092	EUPSC_cluster_5486,EUPSC_cluster_25493,EUPSC_cluster_3803	PF00168 C2 domain-PF00397 WW domain; ; PF00536 SAM domain (Sterile alpha motif)
11522	EUPSC	11393(OCTBI)	OCTBI,EUPSC	Lachesis_group8__53_contigs__length_148332072:17696459..19651981	1955522	EUPSC_cluster_24917,EUPSC_cluster_6744,EUPSC_cluster_6745,EUPSC_cluster_24914,EUPSC_cluster_24920,EUPSC_cluster_12645,EUPSC_cluster_13693	; PF00621 RhoGEF domain; PF00621 RhoGEF domain; PF01436 NHL repeat-PF01436 NHL repeat; PF13445 RING-type zinc-finger-PF00643 B-box zinc finger; PF09754 PAC2 family; PF00288 GHMP kinases N terminal domain
6849	EUPSC	2741(OCTBI)	EUPSC,OCTBI	Lachesis_group35__42_contigs__length_70637049:40394555..41880836	1486281	EUPSC_cluster_16035,EUPSC_cluster_4628,EUPSC_cluster_14463,EUPSC_cluster_1047,EUPSC_cluster_2483,EUPSC_cluster_328,EUPSC_cluster_15292,EUPSC_cluster_10014	PF00063 Myosin head (motor domain)-PF00612 IQ calmodulin-binding motif; ; PF00373 FERM central domain-PF00373 FERM central domain-PF00784 MyTH4 domain-PF00784 MyTH4 domain-PF00788 Ras association (RalGDS/AF-6) domain; PF08159 NUC153 domain; PF01465 GRIP domain; PF01447 Thermolysin metallopeptidase, catalytic domain-PF02868 Thermolysin metallopeptidase, alpha-helical domain-PF03413 Peptidase prope…
3080	OCTBI	4201(EUPSC),3079(CALMI)	CALMI,OCTBI,EUPSC	KQ416454:40818..191091	150273	OCTBI_Ocbimv22032867m.p,OCTBI_Ocbimv22032869m.p,OCTBI_Ocbimv22032871m.p,OCTBI_Ocbimv22032868m.p,OCTBI_Ocbimv22032872m.p,OCTBI_Ocbimv22032875m.p
2591	CALMI	2592(OCTBI)	OCTBI,CALMI	oct004041F:1441..249408	247967	CALMI_Omin008969p,CALMI_Omin008966p,CALMI_Omin008968p,CALMI_Omin008970p,CALMI_Omin008967p,CALMI_Omin008971p
3478	CALMI	3477(OCTBI)	CALMI,OCTBI	oct000745F:54545..423780	369235	CALMI_Omin004522p,CALMI_Omin004519p,CALMI_Omin004517p,CALMI_Omin004521p
3573	CALMI	3574(OCTBI)	OCTBI,CALMI	oct001308F:36378..143094	106716	CALMI_Omin008503p,CALMI_Omin008498p,CALMI_Omin008500p
3761	CALMI	3762(OCTBI)	CALMI,OCTBI	oct004366F:116007..243172	127165	CALMI_Omin010454p,CALMI_Omin010452p,CALMI_Omin010451p
13929	OCTBI	13928(EUPSC)	EUPSC,OCTBI	KQ429763:74029..205854	131825	OCTBI_Ocbimv22016236m.p,OCTBI_Ocbimv22016238m.p,OCTBI_Ocbimv22016239m.p
14556	EUPSC	14555(OCTBI)	OCTBI,EUPSC	Lachesis_group28__49_contigs__length_91470296:89654781..89992694	337913	EUPSC_cluster_8205,EUPSC_cluster_5966,EUPSC_cluster_25080,EUPSC_cluster_11159,EUPSC_cluster_25079	PF00001 7 transmembrane receptor (rhodopsin family); PF13339 Apoptosis antagonizing transcription factor-PF08164 Apoptosis-antagonizing transcription factor, C-terminal; PF01165 Ribosomal protein S21; PF05064 Nsp1-like C-terminal region; PF05064 Nsp1-like C-terminal region
14429	OCTBI	14430(EUPSC)	EUPSC,OCTBI	KQ417917:1216257..1389828	173571	OCTBI_Ocbimv22012560m.p,OCTBI_Ocbimv22012564m.p,OCTBI_Ocbimv22012567m.p
4180	EUPSC	4179(CALMI)	EUPSC,CALMI	Lachesis_group5__70_contigs__length_158228327:156215365..158153642	1938277	EUPSC_cluster_8089,EUPSC_cluster_14301,EUPSC_cluster_6352,EUPSC_cluster_5384	PF02826 D-isomer specific 2-hydroxyacid dehydrogenase, NAD binding domain-PF00389 D-isomer specific 2-hydroxyacid dehydrogenase, catalytic domain; PF00505 HMG (high mobility group) box; PF00505 HMG (high mobility group) box; PF10190 Putative transmembrane protein 170
4414	EUPSC	2851(CALMI),2850(OCTBI)	OCTBI,CALMI,EUPSC	Lachesis_group4__56_contigs__length_174030884:143566880..143794091	227211	EUPSC_cluster_5892,EUPSC_cluster_6040,EUPSC_cluster_14878	PF08389 Exportin 1-like protein; PF10152 Subunit CCDC53 of WASH complex; PF05843 Suppressor of forked protein (Suf)
3112	CALMI	3111(OCTBI)	CALMI,OCTBI,EUPSC	oct005044F:64944..209655	144711	CALMI_Omin002459p,CALMI_Omin002456p,CALMI_Omin002457p
3485	CALMI	2710(OCTBI)	EUPSC,OCTBI,CALMI	oct008082F:75166..158358	83192	CALMI_Omin014478p,CALMI_Omin014476p,CALMI_Omin014477p
2984	OCTBI	2985(CALMI),14572(EUPSC)	OCTBI,CALMI,EUPSC	KQ422349:90652..136331	45679	OCTBI_Ocbimv22035277m.p,OCTBI_Ocbimv22035278m.p,OCTBI_Ocbimv22035279m.p,OCTBI_Ocbimv22035280m.p,OCTBI_Ocbimv22035282m.p
14386	EUPSC	14385(OCTBI)	OCTBI,EUPSC	Lachesis_group1__63_contigs__length_187967259:63627744..63751913	124169	EUPSC_cluster_7683,EUPSC_cluster_1431,EUPSC_cluster_28291	PF00334 Nucleoside diphosphate kinase; ;
14089	EUPSC	14090(OCTBI)	EUPSC,OCTBI	Lachesis_group15__55_contigs__length_125787758:123517604..123580407	62803	EUPSC_cluster_3665,EUPSC_cluster_15323,EUPSC_cluster_4141	PF00787 PX domain; PF02271 Ubiquinol-cytochrome C reductase complex 14kD subunit; PF13913 zinc-finger of a C2HC-type-PF13913 zinc-finger of a C2HC-type
2714	CALMI	2713(OCTBI)	OCTBI,CALMI	oct005025F:44723..149885	105162	CALMI_Omin001893p,CALMI_Omin001892p,CALMI_Omin001895p,CALMI_Omin001894p
4370	EUPSC	2962(CALMI),2632(CALMI)	EUPSC,OCTBI,CALMI	Lachesis_group28__49_contigs__length_91470296:26359043..26852244	493201	EUPSC_cluster_3371,EUPSC_cluster_21240,EUPSC_cluster_21236,EUPSC_cluster_14524	PF10469 AKAP7 2'5' RNA ligase-like domain-PF05773 RWD domain-PF04457 Protein of unknown function (DUF504); ; PF00155 Aminotransferase class I and II; PF00155 Aminotransferase class I and II
2673	CALMI	2674(OCTBI)	OCTBI,CALMI	oct018059F:47556..73018	25462	CALMI_Omin017082p,CALMI_Omin017080p,CALMI_Omin017081p
14390	OCTBI	14391(EUPSC)	EUPSC,OCTBI	KQ426602:85320..167936	82616	OCTBI_Ocbimv22008246m.p,OCTBI_Ocbimv22008247m.p,OCTBI_Ocbimv22008249m.p
13867	OCTBI	13868(EUPSC)	EUPSC,OCTBI	KQ417305:110973..420384	309411	OCTBI_Ocbimv22006241m.p,OCTBI_Ocbimv22006244m.p,OCTBI_Ocbimv22006247m.p
2999	OCTBI	2998(CALMI)	OCTBI,CALMI	KQ419563:14614..112606	97992	OCTBI_Ocbimv22024296m.p,OCTBI_Ocbimv22024298m.p,OCTBI_Ocbimv22024300m.p
2556	CALMI	2557(OCTBI),4216(EUPSC)	OCTBI,CALMI,EUPSC	oct013893F:46..85183	85137	CALMI_Omin024357p,CALMI_Omin024360p,CALMI_Omin024358p
14353	EUPSC	2600(OCTBI)	EUPSC,OCTBI,CALMI	Lachesis_group15__55_contigs__length_125787758:123871611..123997249	125638	EUPSC_cluster_10727,EUPSC_cluster_22543,EUPSC_cluster_8102	PF00036 EF hand; PF13873 Myb/SANT-like DNA-binding domain; PF01485 IBR domain, a half RING-finger domain-PF01485 IBR domain, a half RING-finger domain
3648	OCTBI	3647(CALMI)	CALMI,OCTBI	KQ424932:7404..376719	369315	OCTBI_Ocbimv22003263m.p,OCTBI_Ocbimv22003267m.p,OCTBI_Ocbimv22003268m.p,OCTBI_Ocbimv22003270m.p,OCTBI_Ocbimv22003272m.p,OCTBI_Ocbimv22003273m.p
14091	OCTBI	14092(EUPSC)	OCTBI,EUPSC	KQ418812:813..106179	105366	OCTBI_Ocbimv22019766m.p,OCTBI_Ocbimv22019767m.p,OCTBI_Ocbimv22019770m.p,OCTBI_Ocbimv22019772m.p
2607	OCTBI	2608(CALMI)	CALMI,OCTBI	KQ417037:441549..499756	58207	OCTBI_Ocbimv22002808m.p,OCTBI_Ocbimv22002809m.p,OCTBI_Ocbimv22002811m.p
14295	EUPSC	14296(OCTBI)	OCTBI,EUPSC	Lachesis_group10__55_contigs__length_138218214:122355169..123982852	1627683	EUPSC_cluster_6144,EUPSC_cluster_1269,EUPSC_cluster_16037	PF00069 Protein kinase domain; ; PF14853 Fis1 C-terminal tetratricopeptide repeat
14466	EUPSC	3915(OCTBI)	OCTBI,CALMI,EUPSC	Lachesis_group14__44_contigs__length_129294686:92630333..92891195	260862	EUPSC_cluster_13037,EUPSC_cluster_9474,EUPSC_cluster_1591,EUPSC_cluster_691	PF00147 Fibrinogen beta and gamma chains, C-terminal globular domain; PF00147 Fibrinogen beta and gamma chains, C-terminal globular domain; PF13903 PMP-22/EMP/MP20/Claudin tight junction; PF06046 Exocyst complex component Sec6
3880	OCTBI	3879(CALMI)	CALMI,OCTBI	KQ422268:43464..119348	75884	OCTBI_Ocbimv22035077m.p,OCTBI_Ocbimv22035078m.p,OCTBI_Ocbimv22035079m.p
13966	OCTBI	13965(EUPSC)	OCTBI,EUPSC	KQ416614:832333..1007609	175276	OCTBI_Ocbimv22036036m.p,OCTBI_Ocbimv22036038m.p,OCTBI_Ocbimv22036041m.p
3823	CALMI	3824(OCTBI)	CALMI,OCTBI	oct006002F:10044..137653	127609	CALMI_Omin012142p,CALMI_Omin012141p,CALMI_Omin012139p
2683	CALMI	994(OCTBI)	OCTBI,CALMI	oct000540F:49411..557438	508027	CALMI_Omin008229p,CALMI_Omin008220p,CALMI_Omin008223p,CALMI_Omin008230p,CALMI_Omin008227p,CALMI_Omin008228p,CALMI_Omin008226p,CALMI_Omin008221p,CALMI_Omin008222p
2859	CALMI	2858(OCTBI)	OCTBI,CALMI	oct003917F:20575..247646	227071	CALMI_Omin003119p,CALMI_Omin003118p,CALMI_Omin003120p
3602	OCTBI	3601(CALMI)	CALMI,OCTBI	KQ418733:43743..102200	58457	OCTBI_Ocbimv22019200m.p,OCTBI_Ocbimv22019201m.p,OCTBI_Ocbimv22019202m.p
14133	EUPSC	14132(OCTBI)	EUPSC,OCTBI	Lachesis_group31__46_contigs__length_81539927:6953363..7151924	198561	EUPSC_cluster_12354,EUPSC_cluster_21969,EUPSC_cluster_5506,EUPSC_cluster_8721,EUPSC_cluster_21968,EUPSC_cluster_1441	PF00462 Glutaredoxin; PF07522 DNA repair metallo-beta-lactamase; PF10160 Predicted membrane protein; PF00071 Ras family; PF00071 Ras family; PF08293 Mitochondrial ribosomal subunit S27
3475	CALMI	3476(OCTBI)	CALMI,OCTBI	oct000653F:92817..159659	66842	CALMI_Omin003076p,CALMI_Omin003075p,CALMI_Omin003077p
14208	OCTBI	14209(EUPSC)	OCTBI,EUPSC	KQ416834:197977..299602	101625	OCTBI_Ocbimv22039901m.p,OCTBI_Ocbimv22039902m.p,OCTBI_Ocbimv22039904m.p
14078	OCTBI	14077(EUPSC)	OCTBI,EUPSC	KQ421809:86549..207542	120993	OCTBI_Ocbimv22033422m.p,OCTBI_Ocbimv22033424m.p,OCTBI_Ocbimv22033425m.p,OCTBI_Ocbimv22033427m.p
9067	EUPSC	3412(OCTBI)	OCTBI,CALMI,EUPSC	Lachesis_group9__67_contigs__length_144638433:79850515..84768465	4917950	EUPSC_cluster_16716,EUPSC_cluster_16717,EUPSC_cluster_2791,EUPSC_cluster_16714,EUPSC_cluster_2883,EUPSC_cluster_11036,EUPSC_cluster_9622,EUPSC_cluster_17097,EUPSC_cluster_1808,EUPSC_cluster_15598,EUPSC_cluster_9821,EUPSC_cluster_16046	PF00010 Helix-loop-helix DNA-binding domain; PF00010 Helix-loop-helix DNA-binding domain; PF00018 SH3 domain-PF13499 EF-hand domain pair-PF08726 Ca2+ insensitive EF hand-PF00435 Spectrin repeat-PF00435 Spectrin repeat-PF00435 Spectrin repeat-PF00435 Spectrin repeat-PF00435 Spectrin repeat-PF00435 Spectrin repeat-PF00435 Spectrin repeat-PF00435 Spectrin repeat-PF00435 Spectrin repeat-PF00435 Spect…
14202	OCTBI	14203(EUPSC)	EUPSC,OCTBI	KQ420822:21931..104735	82804	OCTBI_Ocbimv22029787m.p,OCTBI_Ocbimv22029788m.p,OCTBI_Ocbimv22029790m.p,OCTBI_Ocbimv22029791m.p
14072	EUPSC	14071(OCTBI)	OCTBI,EUPSC	Lachesis_group34__47_contigs__length_76047342:35178707..35422232	243525	EUPSC_cluster_24724,EUPSC_cluster_15938,EUPSC_cluster_7613,EUPSC_cluster_24726	PF01912 eIF-6 family; PF01912 eIF-6 family; PF14996 Retinal Maintenance; PF00520 Ion transport protein-PF12796 Ankyrin repeats (3 copies)-PF12796 Ankyrin repeats (3 copies)-PF12796 Ankyrin repeats (3 copies)
3824	OCTBI	3823(CALMI)	CALMI,OCTBI	KQ429566:75150..135913	60763	OCTBI_Ocbimv22015780m.p,OCTBI_Ocbimv22015781m.p,OCTBI_Ocbimv22015782m.p
3330	OCTBI	4390(EUPSC)	EUPSC,OCTBI	KQ416612:1519756..1991579	471823	OCTBI_Ocbimv22035962m.p,OCTBI_Ocbimv22035963m.p,OCTBI_Ocbimv22035964m.p,OCTBI_Ocbimv22035953m.p,OCTBI_Ocbimv22035955m.p,OCTBI_Ocbimv22035957m.p,OCTBI_Ocbimv22035960m.p,OCTBI_Ocbimv22035965m.p
4351	EUPSC	3143(OCTBI),3144(CALMI)	OCTBI,CALMI,EUPSC	Lachesis_group23__35_contigs__length_97660015:40053804..40285211	231407	EUPSC_cluster_20456,EUPSC_cluster_5423,EUPSC_cluster_10795	PF03568 Peptidase family C50; PF14580 Leucine-rich repeat; PF01263 Aldose 1-epimerase
2805	OCTBI	2804(CALMI)	OCTBI,CALMI	KQ416357:41007..469713	428706	OCTBI_Ocbimv22030574m.p,OCTBI_Ocbimv22030575m.p,OCTBI_Ocbimv22030577m.p,OCTBI_Ocbimv22030579m.p
14143	EUPSC	14144(OCTBI)	OCTBI,EUPSC	Lachesis_group31__46_contigs__length_81539927:78816231..78871121	54890	EUPSC_cluster_27134,EUPSC_cluster_27135,EUPSC_cluster_9133	PF07707 BTB And C-terminal Kelch-PF00651 BTB/POZ domain; PF05380 Pao retrotransposon peptidase-PF01222 Ergosterol biosynthesis ERG4/ERG24 family; PF00078 Reverse transcriptase (RNA-dependent DNA polymerase)-PF13499 EF-hand domain pair
14381	EUPSC	14382(OCTBI)	EUPSC,OCTBI	Lachesis_group13__58_contigs__length_132030582:93658821..93839630	180809	EUPSC_cluster_6255,EUPSC_cluster_3722,EUPSC_cluster_8096	PF05811 Eukaryotic protein of unknown function (DUF842); PF00400 WD domain, G-beta repeat; PF00004 ATPase family associated with various cellular activities (AAA)
3096	OCTBI	3668(CALMI),14232(EUPSC)	EUPSC,OCTBI,CALMI	KQ419601:1131273..1571938	440665	OCTBI_Ocbimv22024606m.p,OCTBI_Ocbimv22024607m.p,OCTBI_Ocbimv22024609m.p,OCTBI_Ocbimv22024610m.p,OCTBI_Ocbimv22024598m.p,OCTBI_Ocbimv22024601m.p,OCTBI_Ocbimv22024602m.p,OCTBI_Ocbimv22024603m.p,OCTBI_Ocbimv22024605m.p
3047	OCTBI	14231(EUPSC)	EUPSC,OCTBI	KQ421356:268824..869447	600623	OCTBI_Ocbimv22031842m.p,OCTBI_Ocbimv22031843m.p,OCTBI_Ocbimv22031844m.p,OCTBI_Ocbimv22031832m.p,OCTBI_Ocbimv22031834m.p,OCTBI_Ocbimv22031838m.p,OCTBI_Ocbimv22031840m.p,OCTBI_Ocbimv22031841m.p
3031	OCTBI	14264(EUPSC)	EUPSC,OCTBI	KQ420522:13074..262100	249026	OCTBI_Ocbimv22028561m.p,OCTBI_Ocbimv22028562m.p,OCTBI_Ocbimv22028563m.p,OCTBI_Ocbimv22028567m.p
14551	OCTBI	14550(EUPSC)	EUPSC,OCTBI	KQ416684:408749..509241	100492	OCTBI_Ocbimv22037225m.p,OCTBI_Ocbimv22037226m.p,OCTBI_Ocbimv22037230m.p
3851	CALMI	3850(OCTBI)	OCTBI,CALMI	oct007045F:1756..133838	132082	CALMI_Omin014275p,CALMI_Omin014276p,CALMI_Omin014277p
4324	EUPSC	3534(CALMI)	EUPSC,CALMI,OCTBI	Lachesis_group25__42_contigs__length_94613958:79914857..80210115	295258	EUPSC_cluster_20563,EUPSC_cluster_2470,EUPSC_cluster_20564	; PF00160 Cyclophilin type peptidyl-prolyl cis-trans isomerase/CLD; PF04505 Interferon-induced transmembrane protein
2983	CALMI	2982(OCTBI)	CALMI,OCTBI,EUPSC	oct010552F:26527..95897	69370	CALMI_Omin025871p,CALMI_Omin025869p,CALMI_Omin025870p
2758	CALMI	2759(OCTBI)	OCTBI,CALMI	oct006370F:21026..122491	101465	CALMI_Omin011293p,CALMI_Omin011294p,CALMI_Omin011295p
13920	EUPSC	3811(OCTBI)	OCTBI,CALMI,EUPSC	Lachesis_group9__67_contigs__length_144638433:85304576..85662949	358373	EUPSC_cluster_8749,EUPSC_cluster_645,EUPSC_cluster_17100,EUPSC_cluster_3119,EUPSC_cluster_719,EUPSC_cluster_8902,EUPSC_cluster_8901	PF00179 Ubiquitin-conjugating enzyme; PF14716 Helix-hairpin-helix domain-PF10391 Fingers domain of DNA polymerase lambda-PF14791 DNA polymerase beta thumb-PF14792 DNA polymerase beta palm; PF14791 DNA polymerase beta thumb-PF10391 Fingers domain of DNA polymerase lambda-PF14716 Helix-hairpin-helix domain-PF14792 DNA polymerase beta palm; PF00888 Cullin family-PF10557 Cullin protein neddylation do…
14214	OCTBI	14215(EUPSC)	EUPSC,OCTBI	KQ420157:110890..228645	117755	OCTBI_Ocbimv22026978m.p,OCTBI_Ocbimv22026979m.p,OCTBI_Ocbimv22026982m.p
2674	OCTBI	2673(CALMI),2988(CALMI)	OCTBI,CALMI	KQ417305:434420..496548	62128	OCTBI_Ocbimv22006249m.p,OCTBI_Ocbimv22006250m.p,OCTBI_Ocbimv22006252m.p,OCTBI_Ocbimv22006253m.p,OCTBI_Ocbimv22006254m.p,OCTBI_Ocbimv22006248m.p
2713	OCTBI	2714(CALMI)	OCTBI,CALMI	KQ427464:97592..168992	71400	OCTBI_Ocbimv22010650m.p,OCTBI_Ocbimv22010651m.p,OCTBI_Ocbimv22010652m.p,OCTBI_Ocbimv22010655m.p
2769	OCTBI	2768(CALMI)	OCTBI,CALMI	KQ418922:6086..65889	59803	OCTBI_Ocbimv22020517m.p,OCTBI_Ocbimv22020523m.p,OCTBI_Ocbimv22020524m.p
2562	OCTBI	14374(EUPSC),2563(CALMI)	OCTBI,CALMI,EUPSC	KQ428717:8451..391831	383380	OCTBI_Ocbimv22013980m.p,OCTBI_Ocbimv22013982m.p,OCTBI_Ocbimv22013983m.p,OCTBI_Ocbimv22013985m.p,OCTBI_Ocbimv22013987m.p
14461	OCTBI	14462(EUPSC)	OCTBI,EUPSC	KQ420618:17587..67899	50312	OCTBI_Ocbimv22028962m.p,OCTBI_Ocbimv22028963m.p,OCTBI_Ocbimv22028964m.p
13803	EUPSC	2942(OCTBI)	EUPSC,CALMI,OCTBI	Lachesis_group38__38_contigs__length_61810156:23294335..24072969	778634	EUPSC_cluster_247,EUPSC_cluster_7246,EUPSC_cluster_26056,EUPSC_cluster_6943,EUPSC_cluster_6671	PF00226 DnaJ domain; PF16573 N-terminal beta-sandwich domain of polyadenylation factor-PF06807 Pre-mRNA cleavage complex II protein Clp1-PF16575 mRNA cleavage and polyadenylation factor CLP1 P-loop; PF00069 Protein kinase domain; PF00459 Inositol monophosphatase family; PF15998 Domain of unknown function (DUF4773)
13961	OCTBI	13960(EUPSC)	OCTBI,EUPSC	KQ427385:27816..152973	125157	OCTBI_Ocbimv22010432m.p,OCTBI_Ocbimv22010434m.p,OCTBI_Ocbimv22010435m.p
3567	OCTBI	3568(CALMI)	CALMI,OCTBI	KQ430272:294872..376462	81590	OCTBI_Ocbimv22017384m.p,OCTBI_Ocbimv22017387m.p,OCTBI_Ocbimv22017388m.p
14096	EUPSC	14095(OCTBI)	OCTBI,EUPSC	Lachesis_group0__68_contigs__length_203855924:151066358..151199269	132911	EUPSC_cluster_23949,EUPSC_cluster_6281,EUPSC_cluster_7866	PF14953 Domain of unknown function (DUF4504)-PF14953 Domain of unknown function (DUF4504); PF14953 Domain of unknown function (DUF4504)-PF14953 Domain of unknown function (DUF4504);
14080	EUPSC	14079(OCTBI)	OCTBI,EUPSC	Lachesis_group14__44_contigs__length_129294686:79798026..80168832	370806	EUPSC_cluster_5017,EUPSC_cluster_6497,EUPSC_cluster_22910,EUPSC_cluster_1079	PF00089 Trypsin; PF00089 Trypsin-PF00057 Low-density lipoprotein receptor domain class A-PF00057 Low-density lipoprotein receptor domain class A-PF00629 MAM domain, meprin/A5/mu-PF00629 MAM domain, meprin/A5/mu-PF00629 MAM domain, meprin/A5/mu-PF00629 MAM domain, meprin/A5/mu-PF00530 Scavenger receptor cysteine-rich domain; PF00629 MAM domain, meprin/A5/mu; PF00057 Low-density lipoprotein recepto…
3200	CALMI	3199(OCTBI)	OCTBI,CALMI	oct000848F:47876..299175	251299	CALMI_Omin000031p,CALMI_Omin000030p,CALMI_Omin000033p,CALMI_Omin000029p,CALMI_Omin000032p
3227	OCTBI	3226(CALMI)	CALMI,OCTBI	KQ418902:2416..82494	80078	OCTBI_Ocbimv22020383m.p,OCTBI_Ocbimv22020384m.p,OCTBI_Ocbimv22020386m.p
4151	CALMI	1305(EUPSC)	EUPSC,CALMI	oct013519F:965..65495	64530	CALMI_Omin024242p,CALMI_Omin024243p,CALMI_Omin024244p
3130	OCTBI	3129(CALMI)	CALMI,OCTBI	KQ416491:214809..296426	81617	OCTBI_Ocbimv22033689m.p,OCTBI_Ocbimv22033690m.p,OCTBI_Ocbimv22033691m.p
2907	OCTBI	4316(EUPSC),2908(CALMI)	EUPSC,CALMI,OCTBI	KQ431922:104922..142571	37649	OCTBI_Ocbimv22021004m.p,OCTBI_Ocbimv22021005m.p,OCTBI_Ocbimv22021006m.p
2920	CALMI	2919(OCTBI),3558(OCTBI),4429(EUPSC)	OCTBI,CALMI,EUPSC	oct001654F:18686..413982	395296	CALMI_Omin006772p,CALMI_Omin006759p,CALMI_Omin006762p,CALMI_Omin006771p,CALMI_Omin006763p,CALMI_Omin006766p,CALMI_Omin006761p,CALMI_Omin006768p,CALMI_Omin006769p,CALMI_Omin006767p,CALMI_Omin006765p,CALMI_Omin006770p,CALMI_Omin006764p
4469	EUPSC	3442(OCTBI)	EUPSC,CALMI,OCTBI	Lachesis_group14__44_contigs__length_129294686:110456715..112063022	1606307	EUPSC_cluster_7850,EUPSC_cluster_23302,EUPSC_cluster_23306,EUPSC_cluster_9346,EUPSC_cluster_14045,EUPSC_cluster_5091,EUPSC_cluster_12131,EUPSC_cluster_1740,EUPSC_cluster_23321,EUPSC_cluster_4947,EUPSC_cluster_15211,EUPSC_cluster_6817,EUPSC_cluster_23336,EUPSC_cluster_17415,EUPSC_cluster_23349,EUPSC_cluster_3554,EUPSC_cluster_11939	PF03074 Glutamate-cysteine ligase; PF01391 Collagen triple helix repeat (20 copies)-PF00386 C1q domain; PF03074 Glutamate-cysteine ligase; PF00244 14-3-3 protein; PF00244 14-3-3 protein; PF00466 Ribosomal protein L10; ; ; ; PF16752 Tubulin-specific chaperone C N-terminal domain-PF07986 Tubulin binding cofactor C; PF08241 Methyltransferase domain-PF09654 Protein of unknown function (DUF2396); PF02…
4292	EUPSC	4291(CALMI)	EUPSC,CALMI	Lachesis_group43__26_contigs__length_23511657:3856475..4442898	586423	EUPSC_cluster_5945,EUPSC_cluster_6074,EUPSC_cluster_3822,EUPSC_cluster_8399	PF00179 Ubiquitin-conjugating enzyme; PF13432 Tetratricopeptide repeat-PF14559 Tetratricopeptide repeat-PF13181 Tetratricopeptide repeat-PF13181 Tetratricopeptide repeat; PF00053 Laminin EGF domain-PF00053 Laminin EGF domain-PF00053 Laminin EGF domain; PF00053 Laminin EGF domain-PF00053 Laminin EGF domain-PF00053 Laminin EGF domain-PF00053 Laminin EGF domain-PF00053 Laminin EGF domain-PF00053 Lam…
13806	OCTBI	13807(EUPSC)	OCTBI,EUPSC	KQ419180:385701..516990	131289	OCTBI_Ocbimv22022166m.p,OCTBI_Ocbimv22022167m.p,OCTBI_Ocbimv22022169m.p,OCTBI_Ocbimv22022171m.p,OCTBI_Ocbimv22022172m.p
3896	CALMI	3895(OCTBI)	CALMI,OCTBI	oct000761F:394190..548822	154632	CALMI_Omin007920p,CALMI_Omin007921p,CALMI_Omin007923p,CALMI_Omin007922p,CALMI_Omin007924p
3662	CALMI	3661(OCTBI)	OCTBI,CALMI	oct004205F:70569..157481	86912	CALMI_Omin006281p,CALMI_Omin006284p,CALMI_Omin006278p,CALMI_Omin006277p
3574	OCTBI	3573(CALMI)	CALMI,OCTBI	KQ420112:77459..149215	71756	OCTBI_Ocbimv22026765m.p,OCTBI_Ocbimv22026767m.p,OCTBI_Ocbimv22026768m.p
2797	CALMI	2796(OCTBI)	OCTBI,CALMI	oct007453F:1..109176	109175	CALMI_Omin014916p,CALMI_Omin014917p,CALMI_Omin014918p
3051	OCTBI	2864(CALMI)	CALMI,OCTBI	KQ418859:21878..411576	389698	OCTBI_Ocbimv22020135m.p,OCTBI_Ocbimv22020136m.p,OCTBI_Ocbimv22020137m.p,OCTBI_Ocbimv22020140m.p,OCTBI_Ocbimv22020129m.p,OCTBI_Ocbimv22020130m.p,OCTBI_Ocbimv22020131m.p,OCTBI_Ocbimv22020127m.p,OCTBI_Ocbimv22020128m.p
14351	EUPSC	14350(OCTBI)	OCTBI,EUPSC	Lachesis_group2__55_contigs__length_182973478:105233042..105607831	374789	EUPSC_cluster_5407,EUPSC_cluster_1381,EUPSC_cluster_15129	PF01545 Cation efflux family; PF01513 ATP-NAD kinase; PF00067 Cytochrome P450-PF00067 Cytochrome P450
3831	CALMI	3832(OCTBI)	CALMI,OCTBI	oct002511F:12574..288350	275776	CALMI_Omin003524p,CALMI_Omin003525p,CALMI_Omin003523p,CALMI_Omin003526p
2667	OCTBI	14337(EUPSC),2666(CALMI)	EUPSC,CALMI,OCTBI	KQ416251:48470..304363	255893	OCTBI_Ocbimv22028122m.p,OCTBI_Ocbimv22028123m.p,OCTBI_Ocbimv22028124m.p,OCTBI_Ocbimv22028125m.p,OCTBI_Ocbimv22028127m.p
3956	CALMI	3957(OCTBI)	OCTBI,CALMI	oct002667F:26023..128283	102260	CALMI_Omin003207p,CALMI_Omin003206p,CALMI_Omin003208p
3350	OCTBI	4155(EUPSC),3351(CALMI)	EUPSC,OCTBI,CALMI	KQ429096:359110..576568	217458	OCTBI_Ocbimv22014818m.p,OCTBI_Ocbimv22014819m.p,OCTBI_Ocbimv22014824m.p,OCTBI_Ocbimv22014827m.p,OCTBI_Ocbimv22014830m.p,OCTBI_Ocbimv22014831m.p,OCTBI_Ocbimv22014815m.p
4331	EUPSC	3720(CALMI),2855(OCTBI)	CALMI,OCTBI,EUPSC	Lachesis_group38__38_contigs__length_61810156:39390012..42292096	2902084	EUPSC_cluster_16244,EUPSC_cluster_21410,EUPSC_cluster_21411,EUPSC_cluster_2935,EUPSC_cluster_19966	PF07837 Formiminotransferase domain, N-terminal subdomain-PF07837 Formiminotransferase domain, N-terminal subdomain-PF02971 Formiminotransferase domain-PF04961 Formiminotransferase-cyclodeaminase; PF00147 Fibrinogen beta and gamma chains, C-terminal globular domain; PF07289 Bardet-Biedl syndrome 5 protein-PF07289 Bardet-Biedl syndrome 5 protein; PF02207 Putative zinc finger in N-recognin (UBR box…
3792	CALMI	4147(EUPSC),3793(OCTBI)	EUPSC,OCTBI,CALMI	oct001097F:157448..419354	261906	CALMI_Omin003505p,CALMI_Omin003503p,CALMI_Omin003501p,CALMI_Omin003499p
3599	OCTBI	3600(CALMI)	EUPSC,CALMI,OCTBI	KQ423988:76..69827	69751	OCTBI_Ocbimv22000528m.p,OCTBI_Ocbimv22000529m.p,OCTBI_Ocbimv22000532m.p
2842	OCTBI	3166(CALMI),2843(CALMI)	OCTBI,CALMI	KQ422573:43417..142843	99426	OCTBI_Ocbimv22035833m.p,OCTBI_Ocbimv22035834m.p,OCTBI_Ocbimv22035835m.p,OCTBI_Ocbimv22035836m.p
4446	CALMI	4447(EUPSC)	CALMI,OCTBI,EUPSC	oct006537F:3819..152564	148745	CALMI_Omin015992p,CALMI_Omin015990p,CALMI_Omin015991p
4497	EUPSC	4496(CALMI)	EUPSC,CALMI	Lachesis_group37__50_contigs__length_69233352:32980550..33088205	107655	EUPSC_cluster_10983,EUPSC_cluster_1726,EUPSC_cluster_2394	PF02874 ATP synthase alpha/beta family, beta-barrel domain-PF00006 ATP synthase alpha/beta family, nucleotide-binding domain; PF00249 Myb-like DNA-binding domain-PF00249 Myb-like DNA-binding domain-PF00226 DnaJ domain; PF05000 RNA polymerase Rpb1, domain 4-PF05001 RNA polymerase Rpb1 C-terminal repeat-PF05001 RNA polymerase Rpb1 C-terminal repeat-PF05001 RNA polymerase Rpb1 C-terminal repeat-PF05…
4438	EUPSC	3333(CALMI),2485(OCTBI)	CALMI,OCTBI,EUPSC	Lachesis_group20__56_contigs__length_105542877:102617724..102890035	272311	EUPSC_cluster_26930,EUPSC_cluster_26931,EUPSC_cluster_4134,EUPSC_cluster_26933	PF07679 Immunoglobulin I-set domain; ; PF00071 Ras family; PF00352 Transcription factor TFIID (or TATA-binding protein, TBP)-PF00352 Transcription factor TFIID (or TATA-binding protein, TBP)
3584	CALMI	3583(OCTBI)	OCTBI,CALMI	oct003391F:53209..117460	64251	CALMI_Omin008418p,CALMI_Omin008421p,CALMI_Omin008420p,CALMI_Omin008417p
4147	EUPSC	3793(OCTBI),3792(CALMI)	CALMI,OCTBI,EUPSC	Lachesis_group32__40_contigs__length_78634074:66292982..66567320	274338	EUPSC_cluster_2056,EUPSC_cluster_18,EUPSC_cluster_19141,EUPSC_cluster_9528,EUPSC_cluster_2472	PF05726 Pirin C-terminal cupin domain-PF02678 Pirin; ; PF01158 Ribosomal protein L36e; PF15075 Domain of unknown function (DUF4542); PF00400 WD domain, G-beta repeat-PF00400 WD domain, G-beta repeat
4201	EUPSC	3079(CALMI),3080(OCTBI)	EUPSC,OCTBI,CALMI	Lachesis_group8__53_contigs__length_148332072:31116496..31770154	653658	EUPSC_cluster_6246,EUPSC_cluster_10875,EUPSC_cluster_15729,EUPSC_cluster_7052,EUPSC_cluster_8483,EUPSC_cluster_12551	PF06957 Coatomer (COPI) alpha subunit C-terminus-PF04053 Coatomer WD associated region-PF00400 WD domain, G-beta repeat-PF00400 WD domain, G-beta repeat-PF00400 WD domain, G-beta repeat-PF00400 WD domain, G-beta repeat-PF00400 WD domain, G-beta repeat; PF03665 Uncharacterised protein family (UPF0172); ; PF00462 Glutaredoxin; PF01704 UTP--glucose-1-phosphate uridylyltransferase; PF02866 lactate/ma…
14344	EUPSC	3029(OCTBI)	OCTBI,CALMI,EUPSC	Lachesis_group1__63_contigs__length_187967259:132963622..133077320	113698	EUPSC_cluster_1662,EUPSC_cluster_8536,EUPSC_cluster_26098	; PF00412 LIM domain-PF00412 LIM domain-PF00412 LIM domain; PF00173 Cytochrome b5-like Heme/Steroid binding domain
4131	EUPSC	3624(CALMI),3625(OCTBI)	EUPSC,CALMI,OCTBI	Lachesis_group41__39_contigs__length_54644242:36082554..36396908	314354	EUPSC_cluster_16189,EUPSC_cluster_17078,EUPSC_cluster_12904,EUPSC_cluster_7900,EUPSC_cluster_14271	PF00022 Actin; PF00300 Histidine phosphatase superfamily (branch 1); PF00300 Histidine phosphatase superfamily (branch 1); PF12460 RNAPII transcription regulator C-terminal-PF14500 Dos2-interacting transcription regulator of RNA-Pol-II; PF16455 Ubiquitin-binding domain-PF00240 Ubiquitin family
3150	CALMI	3151(OCTBI)	OCTBI,CALMI	oct005355F:102547..174209	71662	CALMI_Omin014394p,CALMI_Omin014397p,CALMI_Omin014393p,CALMI_Omin014396p
14407	EUPSC	14408(OCTBI)	OCTBI,EUPSC	Lachesis_group23__35_contigs__length_97660015:77912616..78089165	176549	EUPSC_cluster_1209,EUPSC_cluster_2820,EUPSC_cluster_5684	PF03194 LUC7 N_terminus; PF00628 PHD-finger-PF14051 N-terminal domain of DPF2/REQ.;
13907	EUPSC	13906(OCTBI)	EUPSC,OCTBI	Lachesis_group24__36_contigs__length_98752639:46691262..47016288	325026	EUPSC_cluster_23387,EUPSC_cluster_23386,EUPSC_cluster_319,EUPSC_cluster_7072	PF00474 Sodium:solute symporter family-PF00474 Sodium:solute symporter family; PF00335 Tetraspanin family; PF00400 WD domain, G-beta repeat; PF16770 Regulator of Ty1 transposition protein 107 BRCT domain-PF12738 twin BRCT domain-PF00533 BRCA1 C Terminus (BRCT) domain
14050	OCTBI	14049(EUPSC)	EUPSC,OCTBI	KQ418451:55270..343223	287953	OCTBI_Ocbimv22017112m.p,OCTBI_Ocbimv22017114m.p,OCTBI_Ocbimv22017118m.p,OCTBI_Ocbimv22017121m.p
14146	EUPSC	2630(OCTBI)	OCTBI,CALMI,EUPSC	Lachesis_group3__52_contigs__length_175295898:80122969..80227945	104976	EUPSC_cluster_8500,EUPSC_cluster_8501,EUPSC_cluster_14128	PF15489 CST, telomere maintenance, complex subunit CTC1; PF15489 CST, telomere maintenance, complex subunit CTC1; PF01699 Sodium/calcium exchanger protein-PF01699 Sodium/calcium exchanger protein-PF03160 Calx-beta domain-PF03160 Calx-beta domain
3244	OCTBI	3243(CALMI),14102(EUPSC)	EUPSC,OCTBI,CALMI	KQ421523:188962..243065	54103	OCTBI_Ocbimv22032315m.p,OCTBI_Ocbimv22032316m.p,OCTBI_Ocbimv22032317m.p,OCTBI_Ocbimv22032319m.p
3701	OCTBI	13998(EUPSC)	EUPSC,OCTBI	KQ417591:820436..1592026	771590	OCTBI_Ocbimv22009422m.p,OCTBI_Ocbimv22009425m.p,OCTBI_Ocbimv22009426m.p,OCTBI_Ocbimv22009427m.p,OCTBI_Ocbimv22009428m.p,OCTBI_Ocbimv22009429m.p,OCTBI_Ocbimv22009409m.p,OCTBI_Ocbimv22009410m.p,OCTBI_Ocbimv22009412m.p,OCTBI_Ocbimv22009415m.p,OCTBI_Ocbimv22009416m.p,OCTBI_Ocbimv22009417m.p,OCTBI_Ocbimv22009420m.p,OCTBI_Ocbimv22009421m.p
2663	CALMI	2662(OCTBI)	OCTBI,CALMI	oct001367F:2897..115105	112208	CALMI_Omin006992p,CALMI_Omin006993p,CALMI_Omin006994p
14171	OCTBI	6831(EUPSC)	EUPSC,OCTBI	KQ423671:9830..142891	133061	OCTBI_Ocbimv22039446m.p,OCTBI_Ocbimv22039448m.p,OCTBI_Ocbimv22039449m.p,OCTBI_Ocbimv22039453m.p,OCTBI_Ocbimv22039454m.p,OCTBI_Ocbimv22039455m.p
4360	EUPSC	3404(CALMI),3403(OCTBI)	EUPSC,OCTBI,CALMI	Lachesis_group2__55_contigs__length_182973478:45687173..45777548	90375	EUPSC_cluster_1592,EUPSC_cluster_8543,EUPSC_cluster_7165,EUPSC_cluster_7281	PF01370 NAD dependent epimerase/dehydratase family; PF04427 Brix domain; PF00646 F-box domain; PF05773 RWD domain-PF06544 Protein of unknown function (DUF1115)
14105	EUPSC	14106(OCTBI)	EUPSC,OCTBI	Lachesis_group12__46_contigs__length_133395132:88405992..88540721	134729	EUPSC_cluster_6915,EUPSC_cluster_6716,EUPSC_cluster_20171	PF04326 Putative DNA-binding domain; PF00400 WD domain, G-beta repeat-PF00400 WD domain, G-beta repeat-PF00400 WD domain, G-beta repeat-PF00400 WD domain, G-beta repeat-PF00400 WD domain, G-beta repeat-PF00400 WD domain, G-beta repeat-PF04494 WD40 associated region in TFIID subunit, NTD2 domain; PF00004 ATPase family associated with various cellular activities (AAA)-PF09336 Vps4 C terminal oligom…
14266	OCTBI	14265(EUPSC)	OCTBI,EUPSC	KQ430152:44079..146285	102206	OCTBI_Ocbimv22017065m.p,OCTBI_Ocbimv22017067m.p,OCTBI_Ocbimv22017070m.p
4343	EUPSC	2589(OCTBI),2588(CALMI)	CALMI,OCTBI,EUPSC	Lachesis_group40__41_contigs__length_53238745:19103089..19428604	325515	EUPSC_cluster_280,EUPSC_cluster_13537,EUPSC_cluster_8747,EUPSC_cluster_16347	PF00675 Insulinase (Peptidase family M16)-PF05193 Peptidase M16 inactive domain; ; PF02176 TRAF-type zinc finger-PF02176 TRAF-type zinc finger-PF00097 Zinc finger, C3HC4 type (RING finger); PF01151 GNS1/SUR4 family
14495	EUPSC	14494(OCTBI)	EUPSC,OCTBI	Lachesis_group34__47_contigs__length_76047342:9641025..9736927	95902	EUPSC_cluster_2225,EUPSC_cluster_20347,EUPSC_cluster_11629	; PF03024 Folate receptor family;
4271	EUPSC	2783(CALMI)	EUPSC,CALMI,OCTBI	Lachesis_group30__51_contigs__length_87052432:47913986..48200247	286261	EUPSC_cluster_21442,EUPSC_cluster_7014,EUPSC_cluster_12300	; PF13638 PIN domain-PF10373 Est1 DNA/RNA binding domain-PF10374 Telomerase activating protein Est1; PF00069 Protein kinase domain-PF00069 Protein kinase domain-PF00069 Protein kinase domain
13995	OCTBI	13994(EUPSC)	EUPSC,OCTBI	KQ418194:2360630..2633115	272485	OCTBI_Ocbimv22015094m.p,OCTBI_Ocbimv22015098m.p,OCTBI_Ocbimv22015099m.p,OCTBI_Ocbimv22015100m.p
3843	OCTBI	3842(CALMI),14247(EUPSC)	EUPSC,CALMI,OCTBI	KQ422274:14538..136562	122024	OCTBI_Ocbimv22035082m.p,OCTBI_Ocbimv22035083m.p,OCTBI_Ocbimv22035084m.p,OCTBI_Ocbimv22035087m.p,OCTBI_Ocbimv22035091m.p,OCTBI_Ocbimv22035081m.p
14198	OCTBI	14455(EUPSC)	OCTBI,EUPSC	KQ418783:106493..863514	757021	OCTBI_Ocbimv22019554m.p,OCTBI_Ocbimv22019558m.p,OCTBI_Ocbimv22019559m.p,OCTBI_Ocbimv22019560m.p,OCTBI_Ocbimv22019538m.p,OCTBI_Ocbimv22019540m.p,OCTBI_Ocbimv22019545m.p,OCTBI_Ocbimv22019546m.p,OCTBI_Ocbimv22019549m.p,OCTBI_Ocbimv22019550m.p
14192	EUPSC	14191(OCTBI)	EUPSC,OCTBI	Lachesis_group35__42_contigs__length_70637049:53740226..54128553	388327	EUPSC_cluster_27290,EUPSC_cluster_27291,EUPSC_cluster_27292,EUPSC_cluster_27293,EUPSC_cluster_27294	; ; ; PF00098 Zinc knuckle-PF00098 Zinc knuckle;
14408	OCTBI	14407(EUPSC)	OCTBI,EUPSC	KQ416754:282376..415324	132948	OCTBI_Ocbimv22038607m.p,OCTBI_Ocbimv22038608m.p,OCTBI_Ocbimv22038610m.p
3771	OCTBI	3770(CALMI)	OCTBI,CALMI	KQ419543:188389..326086	137697	OCTBI_Ocbimv22024162m.p,OCTBI_Ocbimv22024165m.p,OCTBI_Ocbimv22024166m.p
13902	EUPSC	13903(OCTBI)	EUPSC,OCTBI	Lachesis_group16__53_contigs__length_120303996:80412864..80682600	269736	EUPSC_cluster_15567,EUPSC_cluster_14614,EUPSC_cluster_2023,EUPSC_cluster_28544	PF00067 Cytochrome P450; ; PF00400 WD domain, G-beta repeat-PF00400 WD domain, G-beta repeat; PF13855 Leucine rich repeat
3860	OCTBI	3861(CALMI),4468(EUPSC)	CALMI,OCTBI,EUPSC	KQ426911:17452..280914	263462	OCTBI_Ocbimv22009177m.p,OCTBI_Ocbimv22009178m.p,OCTBI_Ocbimv22009179m.p,OCTBI_Ocbimv22009180m.p,OCTBI_Ocbimv22009181m.p,OCTBI_Ocbimv22009182m.p,OCTBI_Ocbimv22009185m.p,OCTBI_Ocbimv22009186m.p
2793	OCTBI	2794(CALMI)	CALMI,OCTBI	KQ423963:246931..344903	97972	OCTBI_Ocbimv22000438m.p,OCTBI_Ocbimv22000440m.p,OCTBI_Ocbimv22000441m.p
3465	CALMI	3466(OCTBI)	CALMI,OCTBI,EUPSC	oct001128F:58465..419246	360781	CALMI_Omin000701p,CALMI_Omin000703p,CALMI_Omin000702p,CALMI_Omin000699p,CALMI_Omin000700p
2964	OCTBI	2963(CALMI)	CALMI,OCTBI	KQ418821:641799..804038	162239	OCTBI_Ocbimv22019845m.p,OCTBI_Ocbimv22019847m.p,OCTBI_Ocbimv22019850m.p,OCTBI_Ocbimv22019851m.p
2878	CALMI	2879(OCTBI)	OCTBI,CALMI	oct017142F:103..54304	54201	CALMI_Omin020002p,CALMI_Omin020003p,CALMI_Omin020004p
14229	EUPSC	14228(OCTBI)	OCTBI,EUPSC	Lachesis_group26__46_contigs__length_93059273:26776674..27331885	555211	EUPSC_cluster_26322,EUPSC_cluster_10996,EUPSC_cluster_7427,EUPSC_cluster_14777,EUPSC_cluster_7426,EUPSC_cluster_25837,EUPSC_cluster_5924	PF01522 Polysaccharide deacetylase-PF00098 Zinc knuckle; PF00335 Tetraspanin family; PF01852 START domain; ; ; ; PF13646 HEAT repeats-PF02985 HEAT repeat
9077	EUPSC	13847(OCTBI)	EUPSC,OCTBI	Lachesis_group0__68_contigs__length_203855924:149188808..150244228	1055420	EUPSC_cluster_8159,EUPSC_cluster_15259,EUPSC_cluster_1935,EUPSC_cluster_27378,EUPSC_cluster_5328,EUPSC_cluster_27377,EUPSC_cluster_8499	PF00481 Protein phosphatase 2C-PF00481 Protein phosphatase 2C; PF00400 WD domain, G-beta repeat-PF00400 WD domain, G-beta repeat; PF05161 MOFRL family-PF00078 Reverse transcriptase (RNA-dependent DNA polymerase)-PF13660 Domain of unknown function (DUF4147)-PF13660 Domain of unknown function (DUF4147); PF00091 Tubulin/FtsZ family, GTPase domain-PF03953 Tubulin C-terminal domain; PF00855 PWWP domai…
4281	EUPSC	4280(CALMI)	CALMI,EUPSC	Lachesis_group4__56_contigs__length_174030884:13554376..14217012	662636	EUPSC_cluster_521,EUPSC_cluster_9593,EUPSC_cluster_25104,EUPSC_cluster_25103	PF03221 Tc5 transposase DNA-binding domain-PF00651 BTB/POZ domain-PF04218 CENP-B N-terminal DNA-binding domain; PF08337 Plexin cytoplasmic RasGAP domain; PF08337 Plexin cytoplasmic RasGAP domain; PF02214 BTB/POZ domain-PF00520 Ion transport protein
3504	OCTBI	4211(EUPSC),3505(CALMI)	EUPSC,CALMI,OCTBI	KQ422595:147564..190898	43334	OCTBI_Ocbimv22035885m.p,OCTBI_Ocbimv22035887m.p,OCTBI_Ocbimv22035888m.p,OCTBI_Ocbimv22035889m.p,OCTBI_Ocbimv22035884m.p
2525	OCTBI	2524(CALMI),3410(CALMI)	OCTBI,CALMI	KQ415755:1190..26960	25770	OCTBI_Ocbimv22036318m.p,OCTBI_Ocbimv22036319m.p,OCTBI_Ocbimv22036320m.p,OCTBI_Ocbimv22036321m.p
3781	OCTBI	1290(EUPSC)	EUPSC,OCTBI	KQ415823:624999..1135132	510133	OCTBI_Ocbimv22005799m.p,OCTBI_Ocbimv22005800m.p,OCTBI_Ocbimv22005801m.p,OCTBI_Ocbimv22005798m.p,OCTBI_Ocbimv22005790m.p,OCTBI_Ocbimv22005792m.p,OCTBI_Ocbimv22005793m.p,OCTBI_Ocbimv22005795m.p
3911	CALMI	3912(OCTBI),4433(EUPSC)	CALMI,OCTBI,EUPSC	oct010117F:3433..72288	68855	CALMI_Omin027306p,CALMI_Omin027305p,CALMI_Omin027307p,CALMI_Omin027309p
4160	EUPSC	2977(OCTBI),2976(CALMI)	EUPSC,OCTBI,CALMI	Lachesis_group34__47_contigs__length_76047342:75353835..75686533	332698	EUPSC_cluster_3158,EUPSC_cluster_19908,EUPSC_cluster_7955,EUPSC_cluster_2086	PF01699 Sodium/calcium exchanger protein-PF01699 Sodium/calcium exchanger protein-PF03160 Calx-beta domain-PF03160 Calx-beta domain; ; ; PF17171 Glutathione S-transferase, C-terminal domain-PF17172 Glutathione S-transferase N-terminal domain
3439	OCTBI	3438(CALMI),14042(EUPSC)	EUPSC,CALMI,OCTBI	KQ423968:9035..202146	193111	OCTBI_Ocbimv22000448m.p,OCTBI_Ocbimv22000449m.p,OCTBI_Ocbimv22000450m.p,OCTBI_Ocbimv22000451m.p,OCTBI_Ocbimv22000453m.p,OCTBI_Ocbimv22000454m.p,OCTBI_Ocbimv22000443m.p,OCTBI_Ocbimv22000447m.p
13845	EUPSC	13846(OCTBI)	OCTBI,EUPSC	Lachesis_group5__70_contigs__length_158228327:54698594..54879102	180508	EUPSC_cluster_28244,EUPSC_cluster_28245,EUPSC_cluster_4567	PF02138 Beige/BEACH domain-PF00400 WD domain, G-beta repeat-PF00400 WD domain, G-beta repeat-PF00400 WD domain, G-beta repeat; ;
13810	EUPSC	13809(OCTBI)	EUPSC,OCTBI	Lachesis_group35__42_contigs__length_70637049:31543526..31838117	294591	EUPSC_cluster_5721,EUPSC_cluster_257,EUPSC_cluster_24924,EUPSC_cluster_1672	PF04784 Protein of unknown function, DUF547; PF00566 Rab-GTPase-TBC domain; ; PF13637 Ankyrin repeats (many copies)-PF00710 Asparaginase, N-terminal-PF12796 Ankyrin repeats (3 copies)
3625	OCTBI	2731(CALMI),4131(EUPSC),3624(CALMI)	OCTBI,CALMI,EUPSC	KQ430313:10803..154369	143566	OCTBI_Ocbimv22017473m.p,OCTBI_Ocbimv22017475m.p,OCTBI_Ocbimv22017476m.p,OCTBI_Ocbimv22017477m.p,OCTBI_Ocbimv22017478m.p,OCTBI_Ocbimv22017480m.p,OCTBI_Ocbimv22017481m.p,OCTBI_Ocbimv22017482m.p
3060	CALMI	4452(EUPSC),3059(OCTBI)	OCTBI,CALMI,EUPSC	oct003497F:11285..104884	93599	CALMI_Omin000433p,CALMI_Omin000434p,CALMI_Omin000432p
2885	CALMI	2884(OCTBI)	OCTBI,CALMI	oct000329F:304464..406486	102022	CALMI_Omin004279p,CALMI_Omin004282p,CALMI_Omin004277p
2604	CALMI	2605(OCTBI)	OCTBI,CALMI	oct005005F:55392..188741	133349	CALMI_Omin008365p,CALMI_Omin008364p,CALMI_Omin008367p
33	CALMI	1058(OCTBI)	OCTBI,CALMI	oct000389F:29456..340688	311232	CALMI_Omin007221p,CALMI_Omin007214p,CALMI_Omin007222p,CALMI_Omin007219p,CALMI_Omin007223p,CALMI_Omin007213p,CALMI_Omin007220p,CALMI_Omin007211p,CALMI_Omin007215p,CALMI_Omin007218p
3361	CALMI	3360(OCTBI)	CALMI,OCTBI	oct003956F:1293..233670	232377	CALMI_Omin006848p,CALMI_Omin006845p,CALMI_Omin006847p,CALMI_Omin006846p
3270	CALMI	2847(OCTBI)	CALMI,OCTBI	oct015686F:34572..89324	54752	CALMI_Omin017277p,CALMI_Omin017276p,CALMI_Omin017275p
14048	EUPSC	3067(OCTBI)	EUPSC,OCTBI,CALMI	Lachesis_group16__53_contigs__length_120303996:55360661..55459829	99168	EUPSC_cluster_14437,EUPSC_cluster_21191,EUPSC_cluster_6906,EUPSC_cluster_13964,EUPSC_cluster_5213	PF12260 Protein-kinase domain of FAM69; PF06991 Microfibril-associated/Pre-mRNA processing; PF06991 Microfibril-associated/Pre-mRNA processing; PF00118 TCP-1/cpn60 chaperonin family; PF09726 Macoilin family-PF09726 Macoilin family
2977	OCTBI	2976(CALMI),4160(EUPSC)	OCTBI,CALMI,EUPSC	KQ426461:50251..149853	99602	OCTBI_Ocbimv22007807m.p,OCTBI_Ocbimv22007808m.p,OCTBI_Ocbimv22007810m.p,OCTBI_Ocbimv22007813m.p
14042	EUPSC	3439(OCTBI)	CALMI,OCTBI,EUPSC	Lachesis_group40__41_contigs__length_53238745:45749381..46395295	645914	EUPSC_cluster_8606,EUPSC_cluster_6724,EUPSC_cluster_4945,EUPSC_cluster_4795	PF10264 Winged helix Storkhead-box1 domain; PF10660 Iron-containing outer mitochondrial membrane protein N-terminus-PF09360 Iron-binding zinc finger CDGSH type; PF06400 Alpha-2-macroglobulin RAP, N-terminal domain-PF06401 Alpha-2-macroglobulin RAP, C-terminal domain; PF01106 NifU-like domain-PF08712 Scaffold protein Nfu/NifU N terminal
2470	OCTBI	4463(EUPSC),2469(CALMI)	EUPSC,CALMI,OCTBI	KQ424814:164327..554050	389723	OCTBI_Ocbimv22002887m.p,OCTBI_Ocbimv22002889m.p,OCTBI_Ocbimv22002890m.p,OCTBI_Ocbimv22002894m.p,OCTBI_Ocbimv22002895m.p,OCTBI_Ocbimv22002896m.p,OCTBI_Ocbimv22002884m.p,OCTBI_Ocbimv22002897m.p
3468	OCTBI	3469(CALMI)	CALMI,OCTBI	KQ416331:54484..101009	46525	OCTBI_Ocbimv22030094m.p,OCTBI_Ocbimv22030095m.p,OCTBI_Ocbimv22030097m.p
3519	OCTBI	3518(CALMI)	CALMI,OCTBI	KQ418002:274163..286955	12792	OCTBI_Ocbimv22013211m.p,OCTBI_Ocbimv22013212m.p,OCTBI_Ocbimv22013213m.p,OCTBI_Ocbimv22013214m.p
3540	CALMI	4376(EUPSC),2553(OCTBI)	EUPSC,CALMI,OCTBI	oct002627F:5253..210134	204881	CALMI_Omin004476p,CALMI_Omin004477p,CALMI_Omin004475p,CALMI_Omin004474p
3459	CALMI	3458(OCTBI)	OCTBI,CALMI,EUPSC	oct006831F:6925..180925	174000	CALMI_Omin015822p,CALMI_Omin015821p,CALMI_Omin015823p,CALMI_Omin015820p
2903	OCTBI	4425(EUPSC),2904(CALMI)	OCTBI,CALMI,EUPSC	KQ417133:480109..696786	216677	OCTBI_Ocbimv22004074m.p,OCTBI_Ocbimv22004079m.p,OCTBI_Ocbimv22004080m.p,OCTBI_Ocbimv22004083m.p,OCTBI_Ocbimv22004085m.p
3161	CALMI	3162(OCTBI)	CALMI,OCTBI,EUPSC	oct004111F:156664..275700	119036	CALMI_Omin005048p,CALMI_Omin005046p,CALMI_Omin005047p
4316	EUPSC	2907(OCTBI),2908(CALMI)	CALMI,OCTBI,EUPSC	Lachesis_group18__53_contigs__length_106174747:74269991..74401204	131213	EUPSC_cluster_6102,EUPSC_cluster_19657,EUPSC_cluster_9221,EUPSC_cluster_7638	PF00827 Ribosomal L15; PF00400 WD domain, G-beta repeat-PF00400 WD domain, G-beta repeat; ; PF00566 Rab-GTPase-TBC domain
2528	CALMI	2529(OCTBI)	CALMI,OCTBI	oct006659F:10752..180740	169988	CALMI_Omin012192p,CALMI_Omin012193p,CALMI_Omin012191p
3223	CALMI	3222(OCTBI)	CALMI,OCTBI	oct019221F:7834..42628	34794	CALMI_Omin020696p,CALMI_Omin020697p,CALMI_Omin020698p
3280	CALMI	3281(OCTBI)	OCTBI,CALMI	oct001753F:253822..421186	167364	CALMI_Omin005879p,CALMI_Omin005878p,CALMI_Omin005883p
2987	CALMI	2986(OCTBI)	CALMI,OCTBI	oct017492F:1221..52836	51615	CALMI_Omin020638p,CALMI_Omin020640p,CALMI_Omin020639p
3816	OCTBI	3815(CALMI),4302(EUPSC)	EUPSC,OCTBI,CALMI	KQ418844:535..126028	125493	OCTBI_Ocbimv22020033m.p,OCTBI_Ocbimv22020034m.p,OCTBI_Ocbimv22020037m.p,OCTBI_Ocbimv22020038m.p,OCTBI_Ocbimv22020039m.p,OCTBI_Ocbimv22020040m.p
4212	EUPSC	3491(OCTBI),3490(CALMI)	EUPSC,OCTBI,CALMI	Lachesis_group30__51_contigs__length_87052432:53380387..53618644	238257	EUPSC_cluster_7306,EUPSC_cluster_570,EUPSC_cluster_3467,EUPSC_cluster_14819,EUPSC_cluster_13221	; PF00752 XPG N-terminal domain-PF00867 XPG I-region; ; PF12937 F-box-like-PF13516 Leucine Rich repeat;
2480	OCTBI	2479(CALMI),4229(EUPSC),2648(CALMI)	EUPSC,OCTBI,CALMI	KQ426610:171047..374220	203173	OCTBI_Ocbimv22008287m.p,OCTBI_Ocbimv22008288m.p,OCTBI_Ocbimv22008289m.p,OCTBI_Ocbimv22008292m.p,OCTBI_Ocbimv22008290m.p,OCTBI_Ocbimv22008293m.p
2717	CALMI	2718(OCTBI)	OCTBI,CALMI	oct009732F:2049..114038	111989	CALMI_Omin011924p,CALMI_Omin011926p,CALMI_Omin011925p
14263	EUPSC	14262(OCTBI)	OCTBI,EUPSC	Lachesis_group18__53_contigs__length_106174747:8320918..9454214	1133296	EUPSC_cluster_25816,EUPSC_cluster_25817,EUPSC_cluster_25819,EUPSC_cluster_25820,EUPSC_cluster_25821	; ; PF15811 Small VCP/p97-interacting protein; PF15811 Small VCP/p97-interacting protein; PF00923 Transaldolase/Fructose-6-phosphate aldolase
2592	OCTBI	2591(CALMI)	CALMI,OCTBI	KQ420444:141314..309114	167800	OCTBI_Ocbimv22028201m.p,OCTBI_Ocbimv22028202m.p,OCTBI_Ocbimv22028203m.p,OCTBI_Ocbimv22028204m.p,OCTBI_Ocbimv22028205m.p,OCTBI_Ocbimv22028208m.p,OCTBI_Ocbimv22028209m.p
2486	CALMI	2485(OCTBI)	OCTBI,CALMI,EUPSC	oct012945F:3730..94047	90317	CALMI_Omin023993p,CALMI_Omin023991p,CALMI_Omin023992p
3810	CALMI	3811(OCTBI)	CALMI,OCTBI,EUPSC	oct004718F:2240..215074	212834	CALMI_Omin006570p,CALMI_Omin006568p,CALMI_Omin006567p
14132	OCTBI	14133(EUPSC)	EUPSC,OCTBI	KQ430702:10559..171340	160781	OCTBI_Ocbimv22018470m.p,OCTBI_Ocbimv22018472m.p,OCTBI_Ocbimv22018473m.p,OCTBI_Ocbimv22018475m.p,OCTBI_Ocbimv22018476m.p
14203	EUPSC	14202(OCTBI)	OCTBI,EUPSC	Lachesis_group9__67_contigs__length_144638433:30128359..30301761	173402	EUPSC_cluster_18813,EUPSC_cluster_14446,EUPSC_cluster_18812,EUPSC_cluster_18811,EUPSC_cluster_4103	PF01169 Uncharacterized protein family UPF0016-PF01169 Uncharacterized protein family UPF0016; PF01169 Uncharacterized protein family UPF0016; PF01169 Uncharacterized protein family UPF0016-PF01169 Uncharacterized protein family UPF0016; PF00108 Thiolase, N-terminal domain-PF02803 Thiolase, C-terminal domain; PF12796 Ankyrin repeats (3 copies)-PF12796 Ankyrin repeats (3 copies)
14073	OCTBI	14074(EUPSC)	EUPSC,OCTBI	KQ421638:322780..653466	330686	OCTBI_Ocbimv22032706m.p,OCTBI_Ocbimv22032707m.p,OCTBI_Ocbimv22032711m.p
3849	CALMI	3848(OCTBI)	OCTBI,CALMI	oct000732F:202998..467875	264877	CALMI_Omin005123p,CALMI_Omin005127p,CALMI_Omin005128p,CALMI_Omin005124p
14435	EUPSC	14434(OCTBI)	EUPSC,OCTBI	Lachesis_group12__46_contigs__length_133395132:8458695..8832899	374204	EUPSC_cluster_10252,EUPSC_cluster_15024,EUPSC_cluster_24522	PF00610 Domain found in Dishevelled, Egl-10, and Pleckstrin (DEP)-PF03547 Membrane transport protein-PF03547 Membrane transport protein; PF05502 Dynactin p62 family-PF05502 Dynactin p62 family;
2658	OCTBI	3407(CALMI),2659(CALMI),14201(EUPSC)	OCTBI,CALMI,EUPSC	KQ417055:783850..1339768	555918	OCTBI_Ocbimv22003029m.p,OCTBI_Ocbimv22003030m.p,OCTBI_Ocbimv22003032m.p,OCTBI_Ocbimv22003033m.p,OCTBI_Ocbimv22003024m.p,OCTBI_Ocbimv22003025m.p
14352	EUPSC	3165(OCTBI)	OCTBI,CALMI,EUPSC	Lachesis_group13__58_contigs__length_132030582:51728414..52287175	558761	EUPSC_cluster_2971,EUPSC_cluster_2970,EUPSC_cluster_13680,EUPSC_cluster_3805	PF00637 Region in Clathrin and VPS-PF05131 Pep3/Vps18/deep orange family; PF13540 Regulator of chromosome condensation (RCC1) repeat-PF00415 Regulator of chromosome condensation (RCC1) repeat-PF00415 Regulator of chromosome condensation (RCC1) repeat-PF00415 Regulator of chromosome condensation (RCC1) repeat; PF02045 CCAAT-binding transcription factor (CBF-B/NF-YA) subunit B; PF00828 Ribosomal pr…
4310	CALMI	4311(EUPSC)	CALMI,EUPSC	oct020676F:2865..25388	22523	CALMI_Omin017037p,CALMI_Omin017038p,CALMI_Omin017039p
2613	CALMI	2612(OCTBI)	OCTBI,CALMI	oct002375F:157..341581	341424	CALMI_Omin007167p,CALMI_Omin007170p,CALMI_Omin007166p,CALMI_Omin007168p,CALMI_Omin007171p,CALMI_Omin007165p,CALMI_Omin007169p
13814	EUPSC	13813(OCTBI)	OCTBI,EUPSC	Lachesis_group42__34_contigs__length_44581599:30269989..30688576	418587	EUPSC_cluster_2841,EUPSC_cluster_4199,EUPSC_cluster_3279	PF02020 eIF4-gamma/eIF5/eIF2-epsilon-PF02854 MIF4G domain-PF02847 MA3 domain; PF16528 Exocyst component 84 C-terminal-PF08700 Vps51/Vps67;
3597	CALMI	3598(OCTBI)	CALMI,OCTBI	oct004358F:11..132801	132790	CALMI_Omin006419p,CALMI_Omin006417p,CALMI_Omin006418p
2669	OCTBI	2668(CALMI)	OCTBI,CALMI	KQ417492:131060..726382	595322	OCTBI_Ocbimv22008257m.p,OCTBI_Ocbimv22008258m.p,OCTBI_Ocbimv22008259m.p,OCTBI_Ocbimv22008262m.p,OCTBI_Ocbimv22008263m.p,OCTBI_Ocbimv22008265m.p,OCTBI_Ocbimv22008269m.p,OCTBI_Ocbimv22008270m.p,OCTBI_Ocbimv22008274m.p
3382	CALMI	3383(OCTBI)	OCTBI,CALMI	oct007310F:3120..78708	75588	CALMI_Omin010817p,CALMI_Omin010816p,CALMI_Omin010818p
4484	EUPSC	4485(CALMI)	CALMI,EUPSC	Lachesis_group1__63_contigs__length_187967259:14987271..15115194	127923	EUPSC_cluster_13380,EUPSC_cluster_15113,EUPSC_cluster_5870	PF00787 PX domain; PF00787 PX domain; PF04716 ETC complex I subunit conserved region
3961	OCTBI	3962(CALMI),14535(EUPSC)	CALMI,OCTBI,EUPSC	KQ420841:692..53914	53222	OCTBI_Ocbimv22029902m.p,OCTBI_Ocbimv22029903m.p,OCTBI_Ocbimv22029904m.p,OCTBI_Ocbimv22029901m.p
3538	OCTBI	3539(CALMI)	CALMI,OCTBI	KQ421758:549124..710442	161318	OCTBI_Ocbimv22033232m.p,OCTBI_Ocbimv22033233m.p,OCTBI_Ocbimv22033234m.p
3182	CALMI	3181(OCTBI)	CALMI,OCTBI	oct002197F:95912..343717	247805	CALMI_Omin009758p,CALMI_Omin009759p,CALMI_Omin009757p,CALMI_Omin009760p
14579	OCTBI	14580(EUPSC)	OCTBI,EUPSC	KQ416399:77763..312465	234702	OCTBI_Ocbimv22031457m.p,OCTBI_Ocbimv22031458m.p,OCTBI_Ocbimv22031460m.p,OCTBI_Ocbimv22031462m.p,OCTBI_Ocbimv22031467m.p
2476	CALMI	2475(OCTBI)	OCTBI,CALMI	oct004732F:35857..129468	93611	CALMI_Omin000110p,CALMI_Omin000108p,CALMI_Omin000111p,CALMI_Omin000109p
3276	OCTBI	3275(CALMI)	OCTBI,CALMI	KQ424182:156616..252180	95564	OCTBI_Ocbimv22001104m.p,OCTBI_Ocbimv22001108m.p,OCTBI_Ocbimv22001109m.p,OCTBI_Ocbimv22001110m.p
2784	CALMI	2785(OCTBI)	CALMI,OCTBI	oct000409F:273393..664227	390834	CALMI_Omin003024p,CALMI_Omin003023p,CALMI_Omin003022p
3555	CALMI	4457(EUPSC),3554(OCTBI)	CALMI,OCTBI,EUPSC	oct003346F:65151..258225	193074	CALMI_Omin003424p,CALMI_Omin003428p,CALMI_Omin003429p,CALMI_Omin003426p,CALMI_Omin003425p,CALMI_Omin003427p
3415	OCTBI	3416(CALMI)	CALMI,OCTBI	KQ419092:110277..278927	168650	OCTBI_Ocbimv22021732m.p,OCTBI_Ocbimv22021733m.p,OCTBI_Ocbimv22021735m.p
3066	CALMI	3065(OCTBI)	CALMI,OCTBI	oct002629F:28244..292983	264739	CALMI_Omin007072p,CALMI_Omin007073p,CALMI_Omin007071p,CALMI_Omin007070p
14558	OCTBI	14557(EUPSC)	EUPSC,OCTBI	KQ423634:65030..188038	123008	OCTBI_Ocbimv22039371m.p,OCTBI_Ocbimv22039372m.p,OCTBI_Ocbimv22039375m.p
3601	CALMI	3602(OCTBI)	OCTBI,CALMI	oct012621F:1562..101628	100066	CALMI_Omin024156p,CALMI_Omin024158p,CALMI_Omin024157p
3311	CALMI	3310(OCTBI)	CALMI,OCTBI	oct004300F:2970..210117	207147	CALMI_Omin003870p,CALMI_Omin003869p,CALMI_Omin003868p,CALMI_Omin003872p,CALMI_Omin003871p
14388	EUPSC	14387(OCTBI)	OCTBI,EUPSC	Lachesis_group22__46_contigs__length_104782409:101424084..102276648	852564	EUPSC_cluster_790,EUPSC_cluster_6265,EUPSC_cluster_20530,EUPSC_cluster_9332,EUPSC_cluster_20531,EUPSC_cluster_20532	PF04997 RNA polymerase Rpb1, domain 1-PF05000 RNA polymerase Rpb1, domain 4-PF04998 RNA polymerase Rpb1, domain 5-PF04983 RNA polymerase Rpb1, domain 3-PF00623 RNA polymerase Rpb1, domain 2; ; PF13676 TIR domain; PF13676 TIR domain; PF00651 BTB/POZ domain-PF00651 BTB/POZ domain; PF00071 Ras family
14382	OCTBI	14381(EUPSC)	EUPSC,OCTBI	KQ420929:2..33273	33271	OCTBI_Ocbimv22030254m.p,OCTBI_Ocbimv22030255m.p,OCTBI_Ocbimv22030257m.p
2364	CALMI	4293(EUPSC),2831(OCTBI)	OCTBI,CALMI,EUPSC	oct000578F:1923..537100	535177	CALMI_Omin000689p,CALMI_Omin000691p,CALMI_Omin000688p,CALMI_Omin000692p,CALMI_Omin000686p,CALMI_Omin000690p,CALMI_Omin000687p,CALMI_Omin000694p
2767	CALMI	2766(OCTBI)	OCTBI,CALMI	oct004885F:13122..223986	210864	CALMI_Omin001861p,CALMI_Omin001859p,CALMI_Omin001860p
3692	CALMI	3389(OCTBI)	EUPSC,CALMI,OCTBI	oct002871F:36569..206058	169489	CALMI_Omin007602p,CALMI_Omin007604p,CALMI_Omin007603p,CALMI_Omin007605p
14462	EUPSC	14461(OCTBI)	EUPSC,OCTBI	Lachesis_group13__58_contigs__length_132030582:117498288..117946869	448581	EUPSC_cluster_6927,EUPSC_cluster_6697,EUPSC_cluster_970	PF00226 DnaJ domain; PF00659 POLO box duplicated region-PF00659 POLO box duplicated region-PF00069 Protein kinase domain; PF01585 G-patch domain
13962	EUPSC	13963(OCTBI)	OCTBI,EUPSC	Lachesis_group12__46_contigs__length_133395132:22309198..22607609	298411	EUPSC_cluster_6330,EUPSC_cluster_11827,EUPSC_cluster_28871	PF13868 Trichohyalin-plectin-homology domain; PF03348 Serine incorporator (Serinc); PF00105 Zinc finger, C4 type (two domains)-PF00104 Ligand-binding domain of nuclear hormone receptor
14468	OCTBI	14467(EUPSC)	EUPSC,OCTBI	KQ416244:56364..139134	82770	OCTBI_Ocbimv22028031m.p,OCTBI_Ocbimv22028032m.p,OCTBI_Ocbimv22028035m.p,OCTBI_Ocbimv22028038m.p
13968	EUPSC	3103(OCTBI)	EUPSC,OCTBI,CALMI	Lachesis_group23__35_contigs__length_97660015:49007975..49199855	191880	EUPSC_cluster_8780,EUPSC_cluster_10633,EUPSC_cluster_9847	PF14634 zinc-RING finger domain; PF01336 OB-fold nucleic acid binding domain-PF00152 tRNA synthetases class II (D, K and N); PF00083 Sugar (and other) transporter
3229	CALMI	4186(EUPSC),3228(OCTBI)	EUPSC,OCTBI,CALMI	oct010443F:10713..116933	106220	CALMI_Omin026350p,CALMI_Omin026352p,CALMI_Omin026349p,CALMI_Omin026353p,CALMI_Omin026354p,CALMI_Omin026351p
14379	OCTBI	14378(EUPSC)	OCTBI,EUPSC	KQ426026:110605..383974	273369	OCTBI_Ocbimv22006578m.p,OCTBI_Ocbimv22006580m.p,OCTBI_Ocbimv22006581m.p,OCTBI_Ocbimv22006583m.p,OCTBI_Ocbimv22006585m.p,OCTBI_Ocbimv22006586m.p
14165	EUPSC	14164(OCTBI)	EUPSC,OCTBI	Lachesis_group11__73_contigs__length_131769366:18370665..18773014	402349	EUPSC_cluster_3004,EUPSC_cluster_16365,EUPSC_cluster_8885	PF00249 Myb-like DNA-binding domain; PF00287 Sodium / potassium ATPase beta chain;
2909	CALMI	2910(OCTBI)	OCTBI,CALMI	oct000798F:42804..492966	450162	CALMI_Omin007945p,CALMI_Omin007942p,CALMI_Omin007943p,CALMI_Omin007944p
4467	EUPSC	3610(OCTBI),3609(CALMI)	EUPSC,OCTBI,CALMI	Lachesis_group18__53_contigs__length_106174747:105270318..105553886	283568	EUPSC_cluster_18533,EUPSC_cluster_12656,EUPSC_cluster_10778,EUPSC_cluster_18532,EUPSC_cluster_7985,EUPSC_cluster_9703,EUPSC_cluster_8948	PF00076 RNA recognition motif. (a.k.a. RRM, RBD, or RNP domain)-PF00160 Cyclophilin type peptidyl-prolyl cis-trans isomerase/CLD; PF00108 Thiolase, N-terminal domain; PF02803 Thiolase, C-terminal domain-PF00108 Thiolase, N-terminal domain; ; PF14761 Hermansky-Pudlak syndrome 3-PF14763 Hermansky-Pudlak syndrome 3, C-terminal-PF14762 Hermansky-Pudlak syndrome 3, middle region; PF00620 RhoGAP domain…
3558	OCTBI	4429(EUPSC),2920(CALMI)	OCTBI,CALMI,EUPSC	KQ428462:6192..52661	46469	OCTBI_Ocbimv22013355m.p,OCTBI_Ocbimv22013356m.p,OCTBI_Ocbimv22013357m.p,OCTBI_Ocbimv22013358m.p,OCTBI_Ocbimv22013360m.p
3111	OCTBI	13851(EUPSC),3112(CALMI)	EUPSC,CALMI,OCTBI	KQ420545:34775..136178	101403	OCTBI_Ocbimv22028649m.p,OCTBI_Ocbimv22028650m.p,OCTBI_Ocbimv22028651m.p,OCTBI_Ocbimv22028644m.p,OCTBI_Ocbimv22028646m.p
4366	EUPSC	3322(CALMI),3321(OCTBI)	EUPSC,CALMI,OCTBI	Lachesis_group2__55_contigs__length_182973478:74812568..74935697	123129	EUPSC_cluster_1804,EUPSC_cluster_13329,EUPSC_cluster_7085	PF09776 Mitochondrial ribosomal protein L55; PF04258 Signal peptide peptidase; PF15301 SLAIN motif-containing family
3569	CALMI	3570(OCTBI),4427(EUPSC)	EUPSC,OCTBI,CALMI	oct001880F:2904..190152	187248	CALMI_Omin003160p,CALMI_Omin003167p,CALMI_Omin003161p,CALMI_Omin003171p,CALMI_Omin003162p,CALMI_Omin003170p
14076	EUPSC	14075(OCTBI)	EUPSC,OCTBI	Lachesis_group23__35_contigs__length_97660015:30126418..30905187	778769	EUPSC_cluster_6358,EUPSC_cluster_3561,EUPSC_cluster_27982,EUPSC_cluster_14742,EUPSC_cluster_27984,EUPSC_cluster_27985	PF00621 RhoGEF domain-PF14926 Domain of unknown function (DUF4498); ; ; PF03009 Glycerophosphoryl diester phosphodiesterase family; ; PF03009 Glycerophosphoryl diester phosphodiesterase family
2646	CALMI	2647(OCTBI)	EUPSC,OCTBI,CALMI	oct005089F:30630..226337	195707	CALMI_Omin015041p,CALMI_Omin015043p,CALMI_Omin015044p
3762	OCTBI	3761(CALMI)	OCTBI,CALMI	KQ429139:139692..398753	259061	OCTBI_Ocbimv22014939m.p,OCTBI_Ocbimv22014940m.p,OCTBI_Ocbimv22014941m.p,OCTBI_Ocbimv22014936m.p
14419	OCTBI	4447(EUPSC)	EUPSC,OCTBI,CALMI	KQ419223:267503..347551	80048	OCTBI_Ocbimv22022463m.p,OCTBI_Ocbimv22022464m.p,OCTBI_Ocbimv22022465m.p
3513	CALMI	3512(OCTBI),4483(EUPSC)	CALMI,OCTBI,EUPSC	oct006395F:53810..122111	68301	CALMI_Omin013747p,CALMI_Omin013746p,CALMI_Omin013748p
3681	CALMI	2847(OCTBI)	OCTBI,CALMI	oct010229F:15337..117320	101983	CALMI_Omin024884p,CALMI_Omin024883p,CALMI_Omin024881p
14245	OCTBI	14244(EUPSC)	EUPSC,OCTBI	KQ417417:150..196990	196840	OCTBI_Ocbimv22007498m.p,OCTBI_Ocbimv22007500m.p,OCTBI_Ocbimv22007502m.p,OCTBI_Ocbimv22007504m.p,OCTBI_Ocbimv22007506m.p,OCTBI_Ocbimv22007507m.p
14467	EUPSC	14468(OCTBI)	OCTBI,EUPSC	Lachesis_group1__63_contigs__length_187967259:127137774..127445270	307496	EUPSC_cluster_3675,EUPSC_cluster_5991,EUPSC_cluster_1645	PF02213 GYF domain; PF13621 Cupin-like domain; PF00536 SAM domain (Sterile alpha motif)
3345	CALMI	3346(OCTBI)	OCTBI,CALMI	oct003948F:27255..91598	64343	CALMI_Omin009548p,CALMI_Omin009550p,CALMI_Omin009549p
2994	OCTBI	2995(CALMI)	OCTBI,CALMI	KQ426423:23472..167234	143762	OCTBI_Ocbimv22007701m.p,OCTBI_Ocbimv22007703m.p,OCTBI_Ocbimv22007704m.p,OCTBI_Ocbimv22007705m.p
13829	EUPSC	13830(OCTBI)	OCTBI,EUPSC	Lachesis_group30__51_contigs__length_87052432:46471631..46797065	325434	EUPSC_cluster_23103,EUPSC_cluster_2215,EUPSC_cluster_5615,EUPSC_cluster_12717	; PF00849 RNA pseudouridylate synthase; PF06391 CDK-activating kinase assembly factor MAT1-PF17121 Zinc finger, C3HC4 type (RING finger); PF00621 RhoGEF domain-PF00168 C2 domain-PF00620 RhoGAP domain
14515	EUPSC	14514(OCTBI)	OCTBI,EUPSC	Lachesis_group37__50_contigs__length_69233352:856727..1187458	330731	EUPSC_cluster_13711,EUPSC_cluster_15921,EUPSC_cluster_6529,EUPSC_cluster_6911	; PF08920 Splicing factor 3B subunit 1; PF04561 RNA polymerase Rpb2, domain 2-PF06883 RNA polymerase I, Rpa2 specific domain-PF00562 RNA polymerase Rpb2, domain 6-PF04560 RNA polymerase Rpb2, domain 7-PF04563 RNA polymerase beta subunit;
3156	OCTBI	3157(CALMI)	OCTBI,CALMI	KQ427949:28915..64652	35737	OCTBI_Ocbimv22011903m.p,OCTBI_Ocbimv22011904m.p,OCTBI_Ocbimv22011905m.p
4463	EUPSC	2470(OCTBI),2469(CALMI)	EUPSC,CALMI,OCTBI	Lachesis_group31__46_contigs__length_81539927:47842823..49351663	1508840	EUPSC_cluster_22505,EUPSC_cluster_22504,EUPSC_cluster_4538,EUPSC_cluster_15103,EUPSC_cluster_2003,EUPSC_cluster_9919,EUPSC_cluster_16068,EUPSC_cluster_13297,EUPSC_cluster_22105,EUPSC_cluster_22104	PF01734 Patatin-like phospholipase; ; ; PF00133 tRNA synthetases class I (I, L, M and V)-PF08264 Anticodon-binding domain of tRNA; PF08264 Anticodon-binding domain of tRNA-PF00133 tRNA synthetases class I (I, L, M and V); PF08264 Anticodon-binding domain of tRNA-PF00133 tRNA synthetases class I (I, L, M and V)-PF01846 FF domain-PF01846 FF domain-PF01846 FF domain-PF01846 FF domain; PF00932 Lamin …
3457	CALMI	3456(OCTBI)	OCTBI,CALMI,EUPSC	oct002666F:113363..288952	175589	CALMI_Omin001824p,CALMI_Omin001825p,CALMI_Omin001823p
14054	EUPSC	14053(OCTBI)	EUPSC,OCTBI	Lachesis_group16__53_contigs__length_120303996:30827117..30928937	101820	EUPSC_cluster_27746,EUPSC_cluster_6900,EUPSC_cluster_14607	PF03567 Sulfotransferase family; PF00610 Domain found in Dishevelled, Egl-10, and Pleckstrin (DEP); PF00169 PH domain-PF01237 Oxysterol-binding protein
14339	OCTBI	14340(EUPSC)	OCTBI,EUPSC	KQ422986:69542..186378	116836	OCTBI_Ocbimv22037260m.p,OCTBI_Ocbimv22037262m.p,OCTBI_Ocbimv22037263m.p
3356	CALMI	3357(OCTBI)	OCTBI,CALMI,EUPSC	oct002424F:55712..190322	134610	CALMI_Omin002864p,CALMI_Omin002865p,CALMI_Omin002863p,CALMI_Omin002862p
3671	OCTBI	3672(CALMI)	OCTBI,CALMI	KQ418738:38930..137878	98948	OCTBI_Ocbimv22019238m.p,OCTBI_Ocbimv22019240m.p,OCTBI_Ocbimv22019241m.p
14036	EUPSC	14035(OCTBI)	OCTBI,EUPSC	Lachesis_group1__63_contigs__length_187967259:141310956..145416572	4105616	EUPSC_cluster_5317,EUPSC_cluster_5603,EUPSC_cluster_16671,EUPSC_cluster_13544,EUPSC_cluster_21276	PF00186 Dihydrofolate reductase; PF08450 SMP-30/Gluconolaconase/LRE-like region; PF16661 Metallo-beta-lactamase superfamily domain-PF13299 Cleavage and polyadenylation factor 2 C-terminal-PF07521 Zn-dependent metallo-hydrolase RNA specificity domain-PF10996 Beta-Casp domain; PF13299 Cleavage and polyadenylation factor 2 C-terminal-PF07521 Zn-dependent metallo-hydrolase RNA specificity domain; PF0…
14557	EUPSC	14558(OCTBI)	EUPSC,OCTBI	Lachesis_group26__46_contigs__length_93059273:37088769..37248784	160015	EUPSC_cluster_9356,EUPSC_cluster_9357,EUPSC_cluster_13344	PF00400 WD domain, G-beta repeat-PF00400 WD domain, G-beta repeat; PF00400 WD domain, G-beta repeat; PF07859 alpha/beta hydrolase fold-PF07859 alpha/beta hydrolase fold-PF06350 Hormone-sensitive lipase (HSL) N-terminus
3517	CALMI	3516(OCTBI)	CALMI,OCTBI	oct001554F:43076..423972	380896	CALMI_Omin001345p,CALMI_Omin001343p,CALMI_Omin001344p,CALMI_Omin001349p,CALMI_Omin001347p,CALMI_Omin001346p,CALMI_Omin001348p,CALMI_Omin001351p,CALMI_Omin001352p,CALMI_Omin001340p
2693	CALMI	2694(OCTBI)	EUPSC,OCTBI,CALMI	oct001394F:177687..259175	81488	CALMI_Omin010300p,CALMI_Omin010299p,CALMI_Omin010301p
4390	EUPSC	3330(OCTBI)	OCTBI,EUPSC	Lachesis_group7__52_contigs__length_145002158:77377304..78322647	945343	EUPSC_cluster_26106,EUPSC_cluster_16459,EUPSC_cluster_29134,EUPSC_cluster_13245,EUPSC_cluster_26105,EUPSC_cluster_13094,EUPSC_cluster_6200,EUPSC_cluster_26107	PF00620 RhoGAP domain-PF00620 RhoGAP domain; PF12896 Anaphase-promoting complex, cyclosome, subunit 4-PF12894 Anaphase-promoting complex subunit 4 WD40 domain; PF14113 Type VI secretion system (T6SS), amidase effector protein 4; PF00566 Rab-GTPase-TBC domain; ; PF05346 Eukaryotic membrane protein family; PF00505 HMG (high mobility group) box-PF00505 HMG (high mobility group) box;
14340	EUPSC	14339(OCTBI)	EUPSC,OCTBI	Lachesis_group4__56_contigs__length_174030884:82880783..83026518	145735	EUPSC_cluster_14477,EUPSC_cluster_7130,EUPSC_cluster_1966	PF02055 Glycosyl hydrolase family 30 TIM-barrel domain-PF17189 Glycosyl hydrolase family 30 beta sandwich domain; PF16200 C-terminal region of band_7-PF01145 SPFH domain / Band 7 family; PF15492 Neuroblastoma-amplified sequence, N terminal-PF00078 Reverse transcriptase (RNA-dependent DNA polymerase)
2763	OCTBI	2762(CALMI)	OCTBI,CALMI	KQ421731:405171..423904	18733	OCTBI_Ocbimv22033126m.p,OCTBI_Ocbimv22033128m.p,OCTBI_Ocbimv22033129m.p
13866	EUPSC	2862(OCTBI)	CALMI,OCTBI,EUPSC	Lachesis_group35__42_contigs__length_70637049:15681320..16169703	488383	EUPSC_cluster_8104,EUPSC_cluster_13989,EUPSC_cluster_1531,EUPSC_cluster_15184,EUPSC_cluster_2610	PF00611 Fes/CIP4, and EFC/F-BAR homology domain; ; PF07645 Calcium-binding EGF domain; PF00651 BTB/POZ domain;
3890	CALMI	3889(OCTBI)	OCTBI,CALMI	oct008265F:6266..113549	107283	CALMI_Omin015739p,CALMI_Omin015741p,CALMI_Omin015737p,CALMI_Omin015738p
2719	OCTBI	2720(CALMI),3375(CALMI)	CALMI,OCTBI	KQ421143:1419..262779	261360	OCTBI_Ocbimv22030996m.p,OCTBI_Ocbimv22030997m.p,OCTBI_Ocbimv22030998m.p,OCTBI_Ocbimv22030999m.p,OCTBI_Ocbimv22031000m.p,OCTBI_Ocbimv22031001m.p,OCTBI_Ocbimv22031002m.p,OCTBI_Ocbimv22031004m.p
2512	OCTBI	2513(CALMI)	CALMI,OCTBI	KQ423917:64425..110520	46095	OCTBI_Ocbimv22000304m.p,OCTBI_Ocbimv22000305m.p,OCTBI_Ocbimv22000306m.p
3252	CALMI	3251(OCTBI)	OCTBI,CALMI	oct002740F:100828..255172	154344	CALMI_Omin005819p,CALMI_Omin005818p,CALMI_Omin005821p
14387	OCTBI	14388(EUPSC)	EUPSC,OCTBI	KQ418945:521393..770688	249295	OCTBI_Ocbimv22020633m.p,OCTBI_Ocbimv22020636m.p,OCTBI_Ocbimv22020637m.p,OCTBI_Ocbimv22020639m.p
14159	OCTBI	14160(EUPSC)	EUPSC,OCTBI	KQ421894:17073..194746	177673	OCTBI_Ocbimv22033840m.p,OCTBI_Ocbimv22033841m.p,OCTBI_Ocbimv22033843m.p,OCTBI_Ocbimv22033844m.p,OCTBI_Ocbimv22033850m.p
2740	CALMI	2734(OCTBI)	CALMI,OCTBI,EUPSC	oct013076F:20917..54599	33682	CALMI_Omin028494p,CALMI_Omin028491p,CALMI_Omin028492p
2989	CALMI	2698(OCTBI),4306(EUPSC)	CALMI,OCTBI,EUPSC	oct005203F:54411..222781	168370	CALMI_Omin011638p,CALMI_Omin011642p,CALMI_Omin011639p,CALMI_Omin011641p
13975	OCTBI	13976(EUPSC)	OCTBI,EUPSC	KQ416192:217394..341213	123819	OCTBI_Ocbimv22026553m.p,OCTBI_Ocbimv22026554m.p,OCTBI_Ocbimv22026555m.p
13901	EUPSC	2710(OCTBI)	EUPSC,CALMI,OCTBI	Lachesis_group13__58_contigs__length_132030582:56931721..59144865	2213144	EUPSC_cluster_816,EUPSC_cluster_21377,EUPSC_cluster_6913	PF03567 Sulfotransferase family; ; PF01247 Ribosomal protein L35Ae
13863	EUPSC	13864(OCTBI)	OCTBI,EUPSC	Lachesis_group20__56_contigs__length_105542877:46206413..46504089	297676	EUPSC_cluster_19604,EUPSC_cluster_19602,EUPSC_cluster_19601	; PF00595 PDZ domain (Also known as DHR or GLGF);
2926	CALMI	2925(OCTBI)	CALMI,OCTBI	oct003588F:87969..247995	160026	CALMI_Omin002981p,CALMI_Omin002983p,CALMI_Omin002980p
3348	CALMI	3349(OCTBI),4135(EUPSC)	EUPSC,OCTBI,CALMI	oct000180F:106930..782393	675463	CALMI_Omin008777p,CALMI_Omin008775p,CALMI_Omin008781p,CALMI_Omin008782p,CALMI_Omin008780p,CALMI_Omin008774p
14191	OCTBI	14192(EUPSC)	OCTBI,EUPSC	KQ421236:26472..125501	99029	OCTBI_Ocbimv22031417m.p,OCTBI_Ocbimv22031418m.p,OCTBI_Ocbimv22031419m.p
14315	EUPSC	14316(OCTBI)	OCTBI,EUPSC	Lachesis_group10__55_contigs__length_138218214:104618348..104794284	175936	EUPSC_cluster_5169,EUPSC_cluster_3409,EUPSC_cluster_25767	PF00612 IQ calmodulin-binding motif-PF00632 HECT-domain (ubiquitin-transferase); ;
3498	OCTBI	3497(CALMI)	CALMI,OCTBI	KQ418368:239758..321020	81262	OCTBI_Ocbimv22016575m.p,OCTBI_Ocbimv22016577m.p,OCTBI_Ocbimv22016578m.p,OCTBI_Ocbimv22016579m.p,OCTBI_Ocbimv22016581m.p
2571	CALMI	2572(OCTBI)	CALMI,OCTBI	oct006118F:5320..111035	105715	CALMI_Omin011647p,CALMI_Omin011643p,CALMI_Omin011644p,CALMI_Omin011645p
2834	CALMI	2835(OCTBI)	OCTBI,CALMI	oct006399F:4097..141974	137877	CALMI_Omin015513p,CALMI_Omin015514p,CALMI_Omin015516p
3302	OCTBI	3303(CALMI)	CALMI,OCTBI	KQ421758:1670799..1806306	135507	OCTBI_Ocbimv22033261m.p,OCTBI_Ocbimv22033264m.p,OCTBI_Ocbimv22033266m.p
14172	OCTBI	14173(EUPSC)	EUPSC,OCTBI	KQ419607:136266..374514	238248	OCTBI_Ocbimv22024652m.p,OCTBI_Ocbimv22024653m.p,OCTBI_Ocbimv22024656m.p
14178	EUPSC	3784(OCTBI)	EUPSC,OCTBI	Lachesis_group7__52_contigs__length_145002158:116528328..117075340	547012	EUPSC_cluster_10773,EUPSC_cluster_348,EUPSC_cluster_12045,EUPSC_cluster_14228,EUPSC_cluster_10838,EUPSC_cluster_13076	PF01853 MOZ/SAS family-PF01530 Zinc finger, C2HC type; PF00855 PWWP domain; PF13519 von Willebrand factor type A domain-PF02809 Ubiquitin interaction motif-PF02809 Ubiquitin interaction motif-PF02809 Ubiquitin interaction motif; PF13639 Ring finger domain; PF08648 Protein of unknown function (DUF1777); PF00104 Ligand-binding domain of nuclear hormone receptor-PF00105 Zinc finger, C4 type (two dom…
14033	EUPSC	2573(OCTBI)	EUPSC,OCTBI,CALMI	Lachesis_group15__55_contigs__length_125787758:73700706..73851893	151187	EUPSC_cluster_990,EUPSC_cluster_11994,EUPSC_cluster_4374	; PF10269 Transmembrane Fragile-X-F protein; PF14598 PAS domain
2581	OCTBI	2580(CALMI),14290(EUPSC)	CALMI,OCTBI,EUPSC	KQ420696:382216..672208	289992	OCTBI_Ocbimv22029277m.p,OCTBI_Ocbimv22029278m.p,OCTBI_Ocbimv22029279m.p,OCTBI_Ocbimv22029280m.p,OCTBI_Ocbimv22029281m.p,OCTBI_Ocbimv22029282m.p,OCTBI_Ocbimv22029283m.p,OCTBI_Ocbimv22029284m.p,OCTBI_Ocbimv22029285m.p
14540	OCTBI	14539(EUPSC)	EUPSC,OCTBI	KQ421602:16254..166663	150409	OCTBI_Ocbimv22032582m.p,OCTBI_Ocbimv22032584m.p,OCTBI_Ocbimv22032586m.p,OCTBI_Ocbimv22032587m.p
3232	CALMI	3233(OCTBI)	OCTBI,CALMI	oct013826F:37490..85206	47716	CALMI_Omin025621p,CALMI_Omin025619p,CALMI_Omin025620p
14587	OCTBI	14586(EUPSC)	OCTBI,EUPSC	KQ421523:457207..795416	338209	OCTBI_Ocbimv22032326m.p,OCTBI_Ocbimv22032327m.p,OCTBI_Ocbimv22032329m.p,OCTBI_Ocbimv22032330m.p,OCTBI_Ocbimv22032334m.p,OCTBI_Ocbimv22032335m.p
4404	EUPSC	3087(CALMI)	EUPSC,CALMI,OCTBI	Lachesis_group29__46_contigs__length_89259793:35405553..35808767	403214	EUPSC_cluster_14959,EUPSC_cluster_146,EUPSC_cluster_8580,EUPSC_cluster_22037	PF15975 Flotillin-PF01145 SPFH domain / Band 7 family; PF01145 SPFH domain / Band 7 family; PF01509 TruB family pseudouridylate synthase (N terminal domain);
3930	OCTBI	2481(CALMI)	CALMI,OCTBI	KQ425732:171810..258549	86739	OCTBI_Ocbimv22005737m.p,OCTBI_Ocbimv22005738m.p,OCTBI_Ocbimv22005740m.p,OCTBI_Ocbimv22005741m.p,OCTBI_Ocbimv22005745m.p
9094	EUPSC	14324(OCTBI)	EUPSC,OCTBI	Lachesis_group30__51_contigs__length_87052432:40380370..41635783	1255413	EUPSC_cluster_2187,EUPSC_cluster_1612,EUPSC_cluster_1478,EUPSC_cluster_11727,EUPSC_cluster_5358,EUPSC_cluster_4685,EUPSC_cluster_4441,EUPSC_cluster_4766,EUPSC_cluster_24368	; ; PF00787 PX domain-PF09325 Vps5 C terminal like; PF08241 Methyltransferase domain; PF00153 Mitochondrial carrier protein-PF00153 Mitochondrial carrier protein-PF00153 Mitochondrial carrier protein; PF03148 Tektin family; PF01084 Ribosomal protein S18; ; PF12796 Ankyrin repeats (3 copies)
3336	CALMI	3337(OCTBI),4371(EUPSC)	EUPSC,CALMI,OCTBI	oct001791F:5356..419012	413656	CALMI_Omin009769p,CALMI_Omin009768p,CALMI_Omin009766p,CALMI_Omin009770p
14539	EUPSC	14540(OCTBI)	OCTBI,EUPSC	Lachesis_group2__55_contigs__length_182973478:106927924..107222104	294180	EUPSC_cluster_7602,EUPSC_cluster_3945,EUPSC_cluster_6441	PF03155 ALG6, ALG8 glycosyltransferase family; PF03416 Peptidase family C54; PF03215 Rad17 cell cycle checkpoint protein
3441	CALMI	3440(OCTBI)	CALMI,OCTBI	oct000597F:1023..76182	75159	CALMI_Omin001200p,CALMI_Omin001202p,CALMI_Omin001203p
3725	OCTBI	3724(CALMI)	OCTBI,CALMI	KQ418297:382075..509122	127047	OCTBI_Ocbimv22015861m.p,OCTBI_Ocbimv22015862m.p,OCTBI_Ocbimv22015865m.p,OCTBI_Ocbimv22015866m.p,OCTBI_Ocbimv22015867m.p
14424	OCTBI	14425(EUPSC)	OCTBI,EUPSC	KQ418188:82787..385992	303205	OCTBI_Ocbimv22014962m.p,OCTBI_Ocbimv22014967m.p,OCTBI_Ocbimv22014971m.p
14210	OCTBI	14211(EUPSC)	EUPSC,OCTBI	KQ420004:29693..241633	211940	OCTBI_Ocbimv22026143m.p,OCTBI_Ocbimv22026145m.p,OCTBI_Ocbimv22026146m.p,OCTBI_Ocbimv22026147m.p,OCTBI_Ocbimv22026152m.p
2704	CALMI	4332(EUPSC),2705(OCTBI)	CALMI,OCTBI,EUPSC	oct006000F:6309..170085	163776	CALMI_Omin013931p,CALMI_Omin013929p,CALMI_Omin013933p,CALMI_Omin013932p,CALMI_Omin013930p
13924	OCTBI	13925(EUPSC)	EUPSC,OCTBI	KQ417300:113059..162854	49795	OCTBI_Ocbimv22006121m.p,OCTBI_Ocbimv22006122m.p,OCTBI_Ocbimv22006125m.p,OCTBI_Ocbimv22006126m.p
3912	OCTBI	3911(CALMI),4433(EUPSC)	EUPSC,OCTBI,CALMI	KQ418196:3765..220717	216952	OCTBI_Ocbimv22015120m.p,OCTBI_Ocbimv22015122m.p,OCTBI_Ocbimv22015123m.p,OCTBI_Ocbimv22015124m.p,OCTBI_Ocbimv22015116m.p
4386	EUPSC	3717(OCTBI),3020(CALMI),3718(CALMI)	EUPSC,CALMI,OCTBI	Lachesis_group38__38_contigs__length_61810156:45996478..48761436	2764958	EUPSC_cluster_15236,EUPSC_cluster_12424,EUPSC_cluster_21419,EUPSC_cluster_17418,EUPSC_cluster_7947,EUPSC_cluster_19932,EUPSC_cluster_13669	PF00855 PWWP domain-PF00439 Bromodomain; PF03577 Peptidase family C69; PF00010 Helix-loop-helix DNA-binding domain; PF00010 Helix-loop-helix DNA-binding domain; PF03142 Chitin synthase; PF03142 Chitin synthase; PF00270 DEAD/DEAH box helicase
14394	OCTBI	14393(EUPSC)	EUPSC,OCTBI	KQ416526:140430..354021	213591	OCTBI_Ocbimv22034229m.p,OCTBI_Ocbimv22034230m.p,OCTBI_Ocbimv22034231m.p,OCTBI_Ocbimv22034232m.p,OCTBI_Ocbimv22034234m.p
14262	OCTBI	14263(EUPSC)	EUPSC,OCTBI	KQ415992:41683..201591	159908	OCTBI_Ocbimv22018430m.p,OCTBI_Ocbimv22018431m.p,OCTBI_Ocbimv22018432m.p,OCTBI_Ocbimv22018435m.p
2703	CALMI	2702(OCTBI)	CALMI,OCTBI	oct001321F:11898..309199	297301	CALMI_Omin002990p,CALMI_Omin002991p,CALMI_Omin002993p
14268	OCTBI	14267(EUPSC)	OCTBI,EUPSC	KQ419318:331610..488972	157362	OCTBI_Ocbimv22022878m.p,OCTBI_Ocbimv22022879m.p,OCTBI_Ocbimv22022880m.p,OCTBI_Ocbimv22022881m.p,OCTBI_Ocbimv22022883m.p,OCTBI_Ocbimv22022885m.p
2550	OCTBI	2549(CALMI)	OCTBI,CALMI	KQ417731:250441..324368	73927	OCTBI_Ocbimv22010989m.p,OCTBI_Ocbimv22010990m.p,OCTBI_Ocbimv22010992m.p,OCTBI_Ocbimv22010994m.p
3249	OCTBI	4329(EUPSC),3250(CALMI)	OCTBI,CALMI,EUPSC	KQ426075:356186..413780	57594	OCTBI_Ocbimv22006698m.p,OCTBI_Ocbimv22006701m.p,OCTBI_Ocbimv22006702m.p,OCTBI_Ocbimv22006703m.p
2787	OCTBI	4345(EUPSC),2786(CALMI)	CALMI,OCTBI,EUPSC	KQ426806:28796..135971	107175	OCTBI_Ocbimv22008916m.p,OCTBI_Ocbimv22008918m.p,OCTBI_Ocbimv22008919m.p,OCTBI_Ocbimv22008920m.p,OCTBI_Ocbimv22008922m.p
14147	EUPSC	14148(OCTBI)	OCTBI,EUPSC	Lachesis_group35__42_contigs__length_70637049:49770687..49976843	206156	EUPSC_cluster_16920,EUPSC_cluster_766,EUPSC_cluster_16917,EUPSC_cluster_7512,EUPSC_cluster_750,EUPSC_cluster_16908	PF09752 Abhydrolase domain containing 18; PF01080 Presenilin; PF00400 WD domain, G-beta repeat; PF04934 MED6 mediator sub complex component; PF01133 Enhancer of rudimentary; PF10181 GPI-GlcNAc transferase complex, PIG-H component
14530	EUPSC	3773(OCTBI)	EUPSC,CALMI,OCTBI	Lachesis_group17__52_contigs__length_118315660:60735777..60831829	96052	EUPSC_cluster_20655,EUPSC_cluster_20654,EUPSC_cluster_20653	PF00180 Isocitrate/isopropylmalate dehydrogenase-PF00180 Isocitrate/isopropylmalate dehydrogenase; PF12114 Period protein 2/3C-terminal region-PF12114 Period protein 2/3C-terminal region; PF08447 PAS fold
10164	EUPSC	14261(OCTBI)	OCTBI,EUPSC	Lachesis_group11__73_contigs__length_131769366:54824075..55877822	1053747	EUPSC_cluster_29068,EUPSC_cluster_4054,EUPSC_cluster_20385,EUPSC_cluster_2648,EUPSC_cluster_20390,EUPSC_cluster_20388,EUPSC_cluster_848,EUPSC_cluster_20387	PF00166 Chaperonin 10 Kd subunit; PF00118 TCP-1/cpn60 chaperonin family; PF02205 WH2 motif; PF02793 Hormone receptor domain; PF00002 7 transmembrane receptor (Secretin family); PF13898 Domain of unknown function (DUF4205)-PF13898 Domain of unknown function (DUF4205)-PF13898 Domain of unknown function (DUF4205); PF13898 Domain of unknown function (DUF4205);
3886	CALMI	3885(OCTBI)	EUPSC,CALMI,OCTBI	oct004609F:19490..204173	184683	CALMI_Omin005677p,CALMI_Omin005678p,CALMI_Omin005675p,CALMI_Omin005676p
13906	OCTBI	13907(EUPSC)	EUPSC,OCTBI	KQ418293:22015..242012	219997	OCTBI_Ocbimv22015785m.p,OCTBI_Ocbimv22015788m.p,OCTBI_Ocbimv22015789m.p,OCTBI_Ocbimv22015790m.p
2917	OCTBI	14284(EUPSC),2918(CALMI)	EUPSC,CALMI,OCTBI	KQ422062:194224..404594	210370	OCTBI_Ocbimv22034500m.p,OCTBI_Ocbimv22034501m.p,OCTBI_Ocbimv22034502m.p,OCTBI_Ocbimv22034493m.p,OCTBI_Ocbimv22034497m.p,OCTBI_Ocbimv22034498m.p
14406	EUPSC	14405(OCTBI)	OCTBI,EUPSC	Lachesis_group41__39_contigs__length_54644242:9139621..9219168	79547	EUPSC_cluster_18448,EUPSC_cluster_18449,EUPSC_cluster_18451,EUPSC_cluster_8444	PF13180 PDZ domain-PF13365 Trypsin-like peptidase domain; PF13365 Trypsin-like peptidase domain; ; PF17387 Glycosyl hydrolase family 59 central domain-PF02057 Glycosyl hydrolase family 59
3210	CALMI	3211(OCTBI)	OCTBI,CALMI	oct002819F:46262..294349	248087	CALMI_Omin000337p,CALMI_Omin000338p,CALMI_Omin000336p,CALMI_Omin000335p
14219	EUPSC	14220(OCTBI)	OCTBI,EUPSC	Lachesis_group12__46_contigs__length_133395132:129482286..132014683	2532397	EUPSC_cluster_2448,EUPSC_cluster_24445,EUPSC_cluster_24444,EUPSC_cluster_24443,EUPSC_cluster_13646	PF01091 PTN/MK heparin-binding protein family, C-terminal domain-PF01091 PTN/MK heparin-binding protein family, C-terminal domain-PF01091 PTN/MK heparin-binding protein family, C-terminal domain-PF01091 PTN/MK heparin-binding protein family, C-terminal domain-PF01091 PTN/MK heparin-binding protein family, C-terminal domain-PF05196 PTN/MK heparin-binding protein family, N-terminal domain; PF04130 …
3772	CALMI	3773(OCTBI)	EUPSC,OCTBI,CALMI	oct006447F:4627..167096	162469	CALMI_Omin014607p,CALMI_Omin014608p,CALMI_Omin014610p,CALMI_Omin014609p
3630	CALMI	3631(OCTBI)	CALMI,OCTBI	oct009928F:38663..96917	58254	CALMI_Omin010808p,CALMI_Omin010809p,CALMI_Omin010810p,CALMI_Omin010807p
13807	EUPSC	13806(OCTBI)	OCTBI,EUPSC	Lachesis_group9__67_contigs__length_144638433:2409..252989	250580	EUPSC_cluster_13246,EUPSC_cluster_13394,EUPSC_cluster_2685,EUPSC_cluster_2044,EUPSC_cluster_22363,EUPSC_cluster_7465	PF04145 Ctr copper transporter family; PF04145 Ctr copper transporter family; PF00400 WD domain, G-beta repeat-PF00400 WD domain, G-beta repeat; PF00400 WD domain, G-beta repeat-PF00400 WD domain, G-beta repeat-PF00400 WD domain, G-beta repeat-PF00400 WD domain, G-beta repeat; PF00076 RNA recognition motif. (a.k.a. RRM, RBD, or RNP domain); PF10294 Lysine methyltransferase-PF10294 Lysine methyltr…
4376	EUPSC	2554(CALMI),2553(OCTBI),3540(CALMI)	EUPSC,CALMI,OCTBI	Lachesis_group17__52_contigs__length_118315660:70572590..70695567	122977	EUPSC_cluster_2734,EUPSC_cluster_26970,EUPSC_cluster_3398	PF10392 Golgi transport complex subunit 5; PF01040 UbiA prenyltransferase family; PF17207 MCM OB domain-PF12619 Mini-chromosome maintenance protein 2-PF14551 MCM N-terminal domain-PF00493 MCM2/3/5 family
14043	OCTBI	14044(EUPSC)	EUPSC,OCTBI	KQ429784:84982..217949	132967	OCTBI_Ocbimv22016266m.p,OCTBI_Ocbimv22016268m.p,OCTBI_Ocbimv22016271m.p,OCTBI_Ocbimv22016274m.p
3029	OCTBI	14344(EUPSC),3030(CALMI)	CALMI,OCTBI,EUPSC	KQ420471:59778..132365	72587	OCTBI_Ocbimv22028311m.p,OCTBI_Ocbimv22028314m.p,OCTBI_Ocbimv22028315m.p,OCTBI_Ocbimv22028312m.p
3594	CALMI	3595(OCTBI)	OCTBI,CALMI	oct013723F:6346..73442	67096	CALMI_Omin026475p,CALMI_Omin026472p,CALMI_Omin026473p
4186	EUPSC	3228(OCTBI),3229(CALMI)	EUPSC,OCTBI,CALMI	Lachesis_group18__53_contigs__length_106174747:47794605..47955593	160988	EUPSC_cluster_2658,EUPSC_cluster_21802,EUPSC_cluster_14381,EUPSC_cluster_14203	PF01399 PCI domain; PF00226 DnaJ domain-PF00085 Thioredoxin; PF14975 Domain of unknown function (DUF4512);
2764	CALMI	2765(OCTBI),4450(EUPSC)	OCTBI,CALMI,EUPSC	oct003142F:6325..280772	274447	CALMI_Omin008896p,CALMI_Omin008895p,CALMI_Omin008893p,CALMI_Omin008894p,CALMI_Omin008897p
14330	OCTBI	14331(EUPSC)	EUPSC,OCTBI	KQ420662:677441..917361	239920	OCTBI_Ocbimv22029138m.p,OCTBI_Ocbimv22029140m.p,OCTBI_Ocbimv22029141m.p
2530	CALMI	2531(OCTBI)	OCTBI,CALMI	oct004773F:7852..84595	76743	CALMI_Omin001869p,CALMI_Omin001868p,CALMI_Omin001870p
4211	EUPSC	3504(OCTBI),3505(CALMI)	EUPSC,CALMI,OCTBI	Lachesis_group25__42_contigs__length_94613958:46389134..46590852	201718	EUPSC_cluster_20862,EUPSC_cluster_20861,EUPSC_cluster_20860,EUPSC_cluster_13734	PF08271 TFIIB zinc-binding-PF00382 Transcription factor TFIIB repeat-PF00382 Transcription factor TFIIB repeat; PF01753 MYND finger; ; PF01529 DHHC palmitoyltransferase
3086	OCTBI	3087(CALMI)	OCTBI,CALMI,EUPSC	KQ422338:175153..298279	123126	OCTBI_Ocbimv22035234m.p,OCTBI_Ocbimv22035237m.p,OCTBI_Ocbimv22035238m.p,OCTBI_Ocbimv22035240m.p
3162	OCTBI	14174(EUPSC),3161(CALMI)	OCTBI,CALMI,EUPSC	KQ418025:23983..128531	104548	OCTBI_Ocbimv22013459m.p,OCTBI_Ocbimv22013461m.p,OCTBI_Ocbimv22013463m.p,OCTBI_Ocbimv22013464m.p,OCTBI_Ocbimv22013466m.p
14046	OCTBI	14045(EUPSC)	EUPSC,OCTBI	KQ430541:44457..181140	136683	OCTBI_Ocbimv22018052m.p,OCTBI_Ocbimv22018054m.p,OCTBI_Ocbimv22018057m.p,OCTBI_Ocbimv22018058m.p
2694	OCTBI	2693(CALMI),14318(EUPSC)	CALMI,OCTBI,EUPSC	KQ415811:174510..273339	98829	OCTBI_Ocbimv22004997m.p,OCTBI_Ocbimv22004998m.p,OCTBI_Ocbimv22005000m.p,OCTBI_Ocbimv22004996m.p
2818	CALMI	2819(OCTBI)	CALMI,OCTBI	oct002652F:13805..322588	308783	CALMI_Omin005966p,CALMI_Omin005962p,CALMI_Omin005964p,CALMI_Omin005968p,CALMI_Omin005965p
14193	EUPSC	14194(OCTBI)	EUPSC,OCTBI	Lachesis_group4__56_contigs__length_174030884:145315657..147616948	2301291	EUPSC_cluster_1442,EUPSC_cluster_18376,EUPSC_cluster_4702,EUPSC_cluster_9732,EUPSC_cluster_12674,EUPSC_cluster_1448	PF13927 Immunoglobulin domain-PF13927 Immunoglobulin domain-PF00041 Fibronectin type III domain; PF00069 Protein kinase domain; PF00069 Protein kinase domain; PF05071 NADH ubiquinone oxidoreductase subunit NDUFA12; ; PF00069 Protein kinase domain-PF13855 Leucine rich repeat-PF13855 Leucine rich repeat-PF08477 Ras of Complex, Roc, domain of DAPkinase-PF16095 C-terminal of Roc, COR, domain-PF12796 …
3362	CALMI	3359(OCTBI)	OCTBI,CALMI	oct021223F:985..52175	51190	CALMI_Omin019615p,CALMI_Omin019611p,CALMI_Omin019612p
13903	OCTBI	13902(EUPSC)	OCTBI,EUPSC	KQ416846:82309..308269	225960	OCTBI_Ocbimv22000160m.p,OCTBI_Ocbimv22000161m.p,OCTBI_Ocbimv22000162m.p,OCTBI_Ocbimv22000164m.p
13861	OCTBI	13862(EUPSC)	EUPSC,OCTBI	KQ417259:18211..83340	65129	OCTBI_Ocbimv22005514m.p,OCTBI_Ocbimv22005516m.p,OCTBI_Ocbimv22005517m.p
14403	EUPSC	2770(OCTBI)	OCTBI,CALMI,EUPSC	Lachesis_group13__58_contigs__length_132030582:81521618..81825895	304277	EUPSC_cluster_13592,EUPSC_cluster_10130,EUPSC_cluster_14599	PF13374 Tetratricopeptide repeat; PF12796 Ankyrin repeats (3 copies); PF01182 Glucosamine-6-phosphate isomerases/6-phosphogluconolactonase
14235	OCTBI	14236(EUPSC)	OCTBI,EUPSC	KQ420085:7924..168658	160734	OCTBI_Ocbimv22026638m.p,OCTBI_Ocbimv22026642m.p,OCTBI_Ocbimv22026643m.p
4329	EUPSC	3249(OCTBI),3250(CALMI)	OCTBI,CALMI,EUPSC	Lachesis_group31__46_contigs__length_81539927:16669979..16928621	258642	EUPSC_cluster_19510,EUPSC_cluster_6082,EUPSC_cluster_12561,EUPSC_cluster_1781	; PF00583 Acetyltransferase (GNAT) family; PF00756 Putative esterase; PF10075 CSN8/PSMD8/EIF3K family
13820	EUPSC	13819(OCTBI)	OCTBI,EUPSC	Lachesis_group8__53_contigs__length_148332072:93053105..93472815	419710	EUPSC_cluster_28504,EUPSC_cluster_15975,EUPSC_cluster_14542	PF06886 Targeting protein for Xklp2 (TPX2)-PF12214 Cell cycle regulated microtubule associated protein-PF12214 Cell cycle regulated microtubule associated protein; PF05093 Cytokine-induced anti-apoptosis inhibitor 1, Fe-S biogenesis; PF00554 Rel homology DNA-binding domain-PF16179 Rel homology dimerisation domain
2993	OCTBI	4301(EUPSC),2992(CALMI)	EUPSC,CALMI,OCTBI	KQ417371:44115..213691	169576	OCTBI_Ocbimv22007041m.p,OCTBI_Ocbimv22007042m.p,OCTBI_Ocbimv22007045m.p,OCTBI_Ocbimv22007049m.p,OCTBI_Ocbimv22007051m.p
3526	CALMI	3525(OCTBI)	OCTBI,CALMI	oct004196F:164764..223056	58292	CALMI_Omin009332p,CALMI_Omin009333p,CALMI_Omin009334p
3454	OCTBI	3455(CALMI)	OCTBI,CALMI	KQ417100:220850..237013	16163	OCTBI_Ocbimv22003665m.p,OCTBI_Ocbimv22003666m.p,OCTBI_Ocbimv22003668m.p
2955	CALMI	2954(OCTBI)	CALMI,OCTBI,EUPSC	oct001317F:112253..479612	367359	CALMI_Omin007250p,CALMI_Omin007247p,CALMI_Omin007246p,CALMI_Omin007252p,CALMI_Omin007249p,CALMI_Omin007255p,CALMI_Omin007248p,CALMI_Omin007254p,CALMI_Omin007253p
3514	OCTBI	3515(CALMI)	CALMI,OCTBI	KQ425160:469761..507573	37812	OCTBI_Ocbimv22003960m.p,OCTBI_Ocbimv22003961m.p,OCTBI_Ocbimv22003963m.p
4245	EUPSC	2665(OCTBI),2664(CALMI)	OCTBI,CALMI,EUPSC	Lachesis_group4__56_contigs__length_174030884:133676540..134115694	439154	EUPSC_cluster_16938,EUPSC_cluster_16939,EUPSC_cluster_16940,EUPSC_cluster_7934,EUPSC_cluster_16941,EUPSC_cluster_16942,EUPSC_cluster_16943	PF14580 Leucine-rich repeat-PF14580 Leucine-rich repeat-PF13855 Leucine rich repeat; PF14580 Leucine-rich repeat; PF02970 Tubulin binding cofactor A; ; ; ;
3128	CALMI	3127(OCTBI)	CALMI,OCTBI	oct009558F:4855..79286	74431	CALMI_Omin012594p,CALMI_Omin012593p,CALMI_Omin012596p,CALMI_Omin012595p
2561	OCTBI	2560(CALMI)	OCTBI,CALMI	KQ417386:1402102..1463068	60966	OCTBI_Ocbimv22007167m.p,OCTBI_Ocbimv22007168m.p,OCTBI_Ocbimv22007169m.p,OCTBI_Ocbimv22007170m.p
2938	CALMI	2937(OCTBI)	CALMI,OCTBI	oct011768F:2357..98235	95878	CALMI_Omin028548p,CALMI_Omin028550p,CALMI_Omin028549p
3745	OCTBI	3746(CALMI)	OCTBI,CALMI	KQ416933:698865..785356	86491	OCTBI_Ocbimv22001453m.p,OCTBI_Ocbimv22001454m.p,OCTBI_Ocbimv22001457m.p
14224	OCTBI	14225(EUPSC)	EUPSC,OCTBI	KQ425490:28724..195771	167047	OCTBI_Ocbimv22004967m.p,OCTBI_Ocbimv22004969m.p,OCTBI_Ocbimv22004971m.p
13910	EUPSC	13909(OCTBI)	OCTBI,EUPSC	Lachesis_group25__42_contigs__length_94613958:60483660..61914737	1431077	EUPSC_cluster_13267,EUPSC_cluster_6658,EUPSC_cluster_11008,EUPSC_cluster_26548,EUPSC_cluster_1228,EUPSC_cluster_556,EUPSC_cluster_16859	; PF01593 Flavin containing amine oxidoreductase; ; PF10176 Protein of unknown function (DUF2370); ; PF01593 Flavin containing amine oxidoreductase; PF01041 DegT/DnrJ/EryC1/StrS aminotransferase family
3901	OCTBI	13831(EUPSC)	EUPSC,OCTBI	KQ420892:52246..126212	73966	OCTBI_Ocbimv22030105m.p,OCTBI_Ocbimv22030108m.p,OCTBI_Ocbimv22030111m.p,OCTBI_Ocbimv22030102m.p,OCTBI_Ocbimv22030104m.p,OCTBI_Ocbimv22030109m.p,OCTBI_Ocbimv22030110m.p
14275	EUPSC	2478(OCTBI)	OCTBI,CALMI,EUPSC	Lachesis_group29__46_contigs__length_89259793:25513122..25668814	155692	EUPSC_cluster_2105,EUPSC_cluster_1433,EUPSC_cluster_15213,EUPSC_cluster_7378	PF07001 BAT2 N-terminus; ; ;
3032	OCTBI	3033(CALMI),14283(EUPSC)	EUPSC,OCTBI,CALMI	KQ417945:163111..508285	345174	OCTBI_Ocbimv22012836m.p,OCTBI_Ocbimv22012838m.p,OCTBI_Ocbimv22012841m.p,OCTBI_Ocbimv22012834m.p,OCTBI_Ocbimv22012843m.p
3852	CALMI	2677(OCTBI),4195(EUPSC)	EUPSC,CALMI,OCTBI	oct001450F:1484..464896	463412	CALMI_Omin009445p,CALMI_Omin009444p,CALMI_Omin009439p,CALMI_Omin009443p,CALMI_Omin009438p
14071	OCTBI	14072(EUPSC)	EUPSC,OCTBI	KQ417112:185006..236165	51159	OCTBI_Ocbimv22003776m.p,OCTBI_Ocbimv22003777m.p,OCTBI_Ocbimv22003778m.p
14201	EUPSC	2658(OCTBI)	EUPSC,OCTBI,CALMI	Lachesis_group25__42_contigs__length_94613958:87939753..88155516	215763	EUPSC_cluster_4383,EUPSC_cluster_12837,EUPSC_cluster_29047,EUPSC_cluster_4158,EUPSC_cluster_4159	PF00153 Mitochondrial carrier protein-PF00153 Mitochondrial carrier protein; PF00153 Mitochondrial carrier protein-PF00153 Mitochondrial carrier protein-PF00153 Mitochondrial carrier protein; PF00264 Common central domain of tyrosinase; PF04502 Family of unknown function (DUF572);
2946	OCTBI	2945(CALMI)	CALMI,OCTBI	KQ417518:580630..624875	44245	OCTBI_Ocbimv22008653m.p,OCTBI_Ocbimv22008654m.p,OCTBI_Ocbimv22008657m.p,OCTBI_Ocbimv22008658m.p
3290	OCTBI	3291(CALMI)	OCTBI,CALMI	KQ420813:617918..662284	44366	OCTBI_Ocbimv22029721m.p,OCTBI_Ocbimv22029724m.p,OCTBI_Ocbimv22029725m.p
2997	CALMI	2996(OCTBI)	CALMI,OCTBI	oct001933F:19567..65009	45442	CALMI_Omin006267p,CALMI_Omin006271p,CALMI_Omin006272p
14092	EUPSC	14091(OCTBI)	OCTBI,EUPSC	Lachesis_group2__55_contigs__length_182973478:134459170..134842923	383753	EUPSC_cluster_2000,EUPSC_cluster_1641,EUPSC_cluster_28164,EUPSC_cluster_16297	PF03909 BSD domain-PF08567 TFIIH p62 subunit, N-terminal domain; PF00628 PHD-finger-PF13639 Ring finger domain; PF07525 SOCS box; PF00153 Mitochondrial carrier protein-PF00153 Mitochondrial carrier protein-PF00153 Mitochondrial carrier protein
3756	CALMI	4172(EUPSC),2982(OCTBI)	EUPSC,OCTBI,CALMI	oct003990F:4997..211255	206258	CALMI_Omin007813p,CALMI_Omin007816p,CALMI_Omin007817p,CALMI_Omin007814p,CALMI_Omin007815p
4352	EUPSC	3180(OCTBI)	EUPSC,OCTBI	Lachesis_group40__41_contigs__length_53238745:43632054..44347655	715601	EUPSC_cluster_6016,EUPSC_cluster_22403,EUPSC_cluster_16493,EUPSC_cluster_8632,EUPSC_cluster_695,EUPSC_cluster_22400,EUPSC_cluster_22401,EUPSC_cluster_22402,EUPSC_cluster_1210	PF04803 Cor1/Xlr/Xmr conserved region; PF00106 short chain dehydrogenase; ; PF07773 Protein of unknown function (DUF1619); ; PF02010 REJ domain; ; ; PF01545 Cation efflux family
2783	CALMI	2782(OCTBI),4271(EUPSC)	EUPSC,CALMI,OCTBI	oct000587F:180295..592473	412178	CALMI_Omin009210p,CALMI_Omin009206p,CALMI_Omin009211p,CALMI_Omin009207p,CALMI_Omin009209p,CALMI_Omin009205p
2958	CALMI	2959(OCTBI)	OCTBI,CALMI	oct000246F:342803..748079	405276	CALMI_Omin003682p,CALMI_Omin003680p,CALMI_Omin003679p,CALMI_Omin003677p
4306	EUPSC	2698(OCTBI),2989(CALMI)	EUPSC,OCTBI,CALMI	Lachesis_group10__55_contigs__length_138218214:21845309..21970722	125413	EUPSC_cluster_1413,EUPSC_cluster_5137,EUPSC_cluster_9119,EUPSC_cluster_28787,EUPSC_cluster_29196	PF00227 Proteasome subunit-PF10584 Proteasome subunit A N-terminal signature; PF08646 Replication factor-A C terminal domain; ; ; PF09782 NADH:ubiquinone oxidoreductase, NDUFB6/B17 subunit
2913	OCTBI	14465(EUPSC)	OCTBI,EUPSC	KQ417023:1313686..1762538	448852	OCTBI_Ocbimv22002644m.p,OCTBI_Ocbimv22002645m.p,OCTBI_Ocbimv22002646m.p,OCTBI_Ocbimv22002648m.p,OCTBI_Ocbimv22002649m.p,OCTBI_Ocbimv22002652m.p,OCTBI_Ocbimv22002660m.p
2969	CALMI	977(OCTBI),4319(EUPSC)	CALMI,OCTBI,EUPSC	oct001918F:37198..343734	306536	CALMI_Omin003663p,CALMI_Omin003661p,CALMI_Omin003665p,CALMI_Omin003660p,CALMI_Omin003664p,CALMI_Omin003662p
4407	EUPSC	4408(CALMI),14136(OCTBI)	OCTBI,CALMI,EUPSC	Lachesis_group14__44_contigs__length_129294686:36722467..37019721	297254	EUPSC_cluster_13806,EUPSC_cluster_9512,EUPSC_cluster_749,EUPSC_cluster_5003,EUPSC_cluster_5760	PF15239 Domain of unknown function (DUF4586); PF00149 Calcineurin-like phosphoesterase-PF04152 Mre11 DNA-binding presumed domain; ; ;
4248	CALMI	4247(EUPSC)	CALMI,EUPSC	oct002695F:227106..293763	66657	CALMI_Omin008146p,CALMI_Omin008147p,CALMI_Omin008144p
4483	EUPSC	3512(OCTBI),3513(CALMI)	CALMI,OCTBI,EUPSC	Lachesis_group14__44_contigs__length_129294686:41748638..42334934	586296	EUPSC_cluster_29178,EUPSC_cluster_16828,EUPSC_cluster_2077,EUPSC_cluster_2130,EUPSC_cluster_8982,EUPSC_cluster_10714,EUPSC_cluster_12166,EUPSC_cluster_7016	PF05047 Mitochondrial ribosomal protein L51 / S25 / CI-B8 domain; PF05047 Mitochondrial ribosomal protein L51 / S25 / CI-B8 domain; PF10491 NLS-binding and DNA-binding and dimerisation domains of Nrf1-PF10491 NLS-binding and DNA-binding and dimerisation domains of Nrf1; PF17207 MCM OB domain-PF14551 MCM N-terminal domain-PF00493 MCM2/3/5 family; PF02096 60Kd inner membrane protein; PF08574 Transc…
13895	OCTBI	13896(EUPSC)	EUPSC,OCTBI	KQ417377:384184..652271	268087	OCTBI_Ocbimv22007080m.p,OCTBI_Ocbimv22007082m.p,OCTBI_Ocbimv22007083m.p,OCTBI_Ocbimv22007084m.p,OCTBI_Ocbimv22007086m.p,OCTBI_Ocbimv22007088m.p
3806	OCTBI	3805(CALMI)	EUPSC,CALMI,OCTBI	KQ421117:1317198..1921329	604131	OCTBI_Ocbimv22030911m.p,OCTBI_Ocbimv22030914m.p,OCTBI_Ocbimv22030915m.p,OCTBI_Ocbimv22030916m.p,OCTBI_Ocbimv22030918m.p,OCTBI_Ocbimv22030920m.p,OCTBI_Ocbimv22030922m.p,OCTBI_Ocbimv22030901m.p,OCTBI_Ocbimv22030906m.p,OCTBI_Ocbimv22030907m.p,OCTBI_Ocbimv22030924m.p
3125	CALMI	3126(OCTBI)	OCTBI,CALMI	oct005348F:12990..178297	165307	CALMI_Omin012450p,CALMI_Omin012448p,CALMI_Omin012446p,CALMI_Omin012449p,CALMI_Omin012447p
2898	CALMI	2897(OCTBI)	OCTBI,CALMI	oct007573F:3511..129885	126374	CALMI_Omin014903p,CALMI_Omin014905p,CALMI_Omin014906p,CALMI_Omin014904p
3434	CALMI	3435(OCTBI)	CALMI,OCTBI	oct000171F:854..678767	677913	CALMI_Omin009602p,CALMI_Omin009603p,CALMI_Omin009599p
2935	OCTBI	4185(EUPSC),2936(CALMI)	OCTBI,CALMI,EUPSC	KQ416353:28667..235550	206883	OCTBI_Ocbimv22030495m.p,OCTBI_Ocbimv22030496m.p,OCTBI_Ocbimv22030497m.p,OCTBI_Ocbimv22030499m.p,OCTBI_Ocbimv22030500m.p
3748	OCTBI	3747(CALMI)	CALMI,OCTBI	KQ418303:122103..158640	36537	OCTBI_Ocbimv22015910m.p,OCTBI_Ocbimv22015911m.p,OCTBI_Ocbimv22015912m.p
11945	OCTBI	4178(EUPSC)	EUPSC,OCTBI	KQ416765:101858..889089	787231	OCTBI_Ocbimv22038765m.p,OCTBI_Ocbimv22038768m.p,OCTBI_Ocbimv22038770m.p,OCTBI_Ocbimv22038771m.p,OCTBI_Ocbimv22038760m.p,OCTBI_Ocbimv22038763m.p,OCTBI_Ocbimv22038769m.p,OCTBI_Ocbimv22038775m.p,OCTBI_Ocbimv22038778m.p
2707	CALMI	2706(OCTBI),4353(EUPSC)	OCTBI,CALMI,EUPSC	oct001840F:84310..262634	178324	CALMI_Omin003223p,CALMI_Omin003224p,CALMI_Omin003225p
2720	CALMI	3393(OCTBI),2719(OCTBI)	OCTBI,CALMI	oct002831F:5719..284190	278471	CALMI_Omin006791p,CALMI_Omin006786p,CALMI_Omin006785p,CALMI_Omin006789p,CALMI_Omin006792p,CALMI_Omin006787p,CALMI_Omin006784p,CALMI_Omin006788p,CALMI_Omin006790p
13945	OCTBI	13944(EUPSC)	EUPSC,OCTBI	KQ416518:457194..588506	131312	OCTBI_Ocbimv22034179m.p,OCTBI_Ocbimv22034182m.p,OCTBI_Ocbimv22034185m.p
14267	EUPSC	14268(OCTBI)	OCTBI,EUPSC	Lachesis_group9__67_contigs__length_144638433:120627916..121260200	632284	EUPSC_cluster_24021,EUPSC_cluster_15901,EUPSC_cluster_305,EUPSC_cluster_24020,EUPSC_cluster_5844	PF16197 Ketoacyl-synthetase C-terminal extension-PF00975 Thioesterase domain-PF02801 Beta-ketoacyl synthase, C-terminal domain-PF00109 Beta-ketoacyl synthase, N-terminal domain; PF00011 Hsp20/alpha crystallin family; PF13768 von Willebrand factor type A domain; ;
3736	OCTBI	3737(CALMI),4461(EUPSC)	OCTBI,CALMI,EUPSC	KQ429470:29585..174782	145197	OCTBI_Ocbimv22015675m.p,OCTBI_Ocbimv22015679m.p,OCTBI_Ocbimv22015680m.p,OCTBI_Ocbimv22015682m.p,OCTBI_Ocbimv22015673m.p
4332	EUPSC	2704(CALMI),2932(CALMI)	EUPSC,OCTBI,CALMI	Lachesis_group21__43_contigs__length_103963499:33957780..34040841	83061	EUPSC_cluster_18931,EUPSC_cluster_6010,EUPSC_cluster_881,EUPSC_cluster_278	PF14640 Transmembrane protein 223; PF00271 Helicase conserved C-terminal domain-PF00270 DEAD/DEAH box helicase; PF06113 Brain and reproductive organ-expressed protein (BRE);
2773	CALMI	2772(OCTBI)	CALMI,OCTBI,EUPSC	oct006295F:39851..101257	61406	CALMI_Omin013911p,CALMI_Omin013909p,CALMI_Omin013910p
3325	CALMI	3326(OCTBI)	OCTBI,CALMI	oct001385F:116672..477346	360674	CALMI_Omin009824p,CALMI_Omin009820p,CALMI_Omin009823p
3791	OCTBI	3790(CALMI),4188(EUPSC)	EUPSC,OCTBI,CALMI	KQ433417:278605..337881	59276	OCTBI_Ocbimv22023478m.p,OCTBI_Ocbimv22023479m.p,OCTBI_Ocbimv22023480m.p,OCTBI_Ocbimv22023477m.p
3661	OCTBI	3662(CALMI)	CALMI,OCTBI	KQ423031:38365..193579	155214	OCTBI_Ocbimv22037449m.p,OCTBI_Ocbimv22037450m.p,OCTBI_Ocbimv22037454m.p
3832	OCTBI	3831(CALMI)	CALMI,OCTBI	KQ420517:219397..441446	222049	OCTBI_Ocbimv22028526m.p,OCTBI_Ocbimv22028530m.p,OCTBI_Ocbimv22028531m.p,OCTBI_Ocbimv22028533m.p
6831	EUPSC	14171(OCTBI)	EUPSC,OCTBI	Lachesis_group30__51_contigs__length_87052432:39137652..39534048	396396	EUPSC_cluster_15626,EUPSC_cluster_23182,EUPSC_cluster_23184,EUPSC_cluster_3396,EUPSC_cluster_23186,EUPSC_cluster_12476,EUPSC_cluster_23187	PF10613 Ligated ion channel L-glutamate- and glycine-binding site-PF00060 Ligand-gated ion channel; ; PF10613 Ligated ion channel L-glutamate- and glycine-binding site-PF00060 Ligand-gated ion channel; PF10245 Mitochondrial 28S ribosomal protein S22; ; ; PF16006 Nucleolar and spindle-associated protein
14142	EUPSC	14141(OCTBI)	EUPSC,OCTBI	Lachesis_group1__63_contigs__length_187967259:16973182..17809425	836243	EUPSC_cluster_4151,EUPSC_cluster_2580,EUPSC_cluster_14837	PF02882 Tetrahydrofolate dehydrogenase/cyclohydrolase, NAD(P)-binding domain-PF01268 Formate--tetrahydrofolate ligase-PF00763 Tetrahydrofolate dehydrogenase/cyclohydrolase, catalytic domain; PF16561 Glycogen recognition site of AMP-activated protein kinase;
13795	EUPSC	13796(OCTBI)	OCTBI,EUPSC	Lachesis_group24__36_contigs__length_98752639:86877654..87088673	211019	EUPSC_cluster_17201,EUPSC_cluster_13475,EUPSC_cluster_2730	; PF00561 alpha/beta hydrolase fold; PF00076 RNA recognition motif. (a.k.a. RRM, RBD, or RNP domain)-PF00665 Integrase core domain-PF13865 C-terminal duplication domain of Friend of PRMT1
4291	CALMI	4292(EUPSC)	CALMI,EUPSC	oct007114F:25169..190076	164907	CALMI_Omin014256p,CALMI_Omin014255p,CALMI_Omin014257p
14148	OCTBI	14147(EUPSC)	EUPSC,OCTBI	KQ424738:33799..141212	107413	OCTBI_Ocbimv22002678m.p,OCTBI_Ocbimv22002682m.p,OCTBI_Ocbimv22002683m.p,OCTBI_Ocbimv22002684m.p,OCTBI_Ocbimv22002685m.p,OCTBI_Ocbimv22002686m.p
2590	OCTBI	1889(CALMI)	OCTBI,CALMI	KQ416666:788499..1830668	1042169	OCTBI_Ocbimv22036933m.p,OCTBI_Ocbimv22036934m.p,OCTBI_Ocbimv22036935m.p,OCTBI_Ocbimv22036936m.p,OCTBI_Ocbimv22036937m.p,OCTBI_Ocbimv22036938m.p,OCTBI_Ocbimv22036945m.p,OCTBI_Ocbimv22036946m.p,OCTBI_Ocbimv22036948m.p,OCTBI_Ocbimv22036949m.p,OCTBI_Ocbimv22036951m.p,OCTBI_Ocbimv22036952m.p,OCTBI_Ocbimv22036954m.p,OCTBI_Ocbimv22036956m.p,OCTBI_Ocbimv22036959m.p,OCTBI_Ocbimv22036962m.p
3323	CALMI	3324(OCTBI)	EUPSC,CALMI,OCTBI	oct000801F:112554..324533	211979	CALMI_Omin001435p,CALMI_Omin001432p,CALMI_Omin001433p
4216	EUPSC	2557(OCTBI),2556(CALMI),3780(CALMI)	CALMI,OCTBI,EUPSC	Lachesis_group6__62_contigs__length_156955521:81625072..81968368	343296	EUPSC_cluster_17403,EUPSC_cluster_17404,EUPSC_cluster_2484,EUPSC_cluster_17406,EUPSC_cluster_12161	PF00225 Kinesin motor domain; ; PF00225 Kinesin motor domain; PF02792 Mago nashi protein; PF00443 Ubiquitin carboxyl-terminal hydrolase
3812	CALMI	3813(OCTBI)	OCTBI,CALMI	oct011427F:11795..119783	107988	CALMI_Omin024469p,CALMI_Omin024468p,CALMI_Omin024467p
2775	CALMI	3442(OCTBI)	EUPSC,CALMI,OCTBI	oct005878F:61706..184168	122462	CALMI_Omin012081p,CALMI_Omin012080p,CALMI_Omin012082p,CALMI_Omin012079p
14348	OCTBI	14347(EUPSC)	OCTBI,EUPSC	KQ422481:192491..221577	29086	OCTBI_Ocbimv22035628m.p,OCTBI_Ocbimv22035630m.p,OCTBI_Ocbimv22035633m.p
3170	OCTBI	3169(CALMI)	OCTBI,CALMI	KQ429629:4579..38650	34071	OCTBI_Ocbimv22015956m.p,OCTBI_Ocbimv22015957m.p,OCTBI_Ocbimv22015958m.p
4475	EUPSC	3888(CALMI),3887(OCTBI)	EUPSC,CALMI,OCTBI	Lachesis_group1__63_contigs__length_187967259:32651273..33428980	777707	EUPSC_cluster_863,EUPSC_cluster_7625,EUPSC_cluster_588,EUPSC_cluster_8582,EUPSC_cluster_8411,EUPSC_cluster_5735,EUPSC_cluster_4125,EUPSC_cluster_2546	PF03635 Vacuolar protein sorting-associated protein 35; PF05460 Origin recognition complex subunit 6 (ORC6); ; PF13833 EF-hand domain pair-PF13202 EF hand-PF13499 EF-hand domain pair-PF13499 EF-hand domain pair; PF00098 Zinc knuckle-PF09337 His(2)-Cys(2) zinc finger-PF02769 AIR synthase related protein, C-terminal domain-PF02023 SCAN domain-PF00665 Integrase core domain; PF15011 Casein Kinase 2 s…
4312	EUPSC	3917(OCTBI),3918(CALMI)	OCTBI,CALMI,EUPSC	Lachesis_group4__56_contigs__length_174030884:124215457..124722302	506845	EUPSC_cluster_12605,EUPSC_cluster_12755,EUPSC_cluster_1669,EUPSC_cluster_1518,EUPSC_cluster_2640	PF04733 Coatomer epsilon subunit-PF04733 Coatomer epsilon subunit; PF10234 Clusterin-associated protein-1; PF00240 Ubiquitin family-PF00627 UBA/TS-N domain; PF00855 PWWP domain-PF00855 PWWP domain;
3380	OCTBI	3381(CALMI),4130(EUPSC)	CALMI,OCTBI,EUPSC	KQ418120:522260..636320	114060	OCTBI_Ocbimv22014350m.p,OCTBI_Ocbimv22014352m.p,OCTBI_Ocbimv22014353m.p,OCTBI_Ocbimv22014354m.p,OCTBI_Ocbimv22014355m.p
2817	OCTBI	13789(EUPSC),2816(CALMI)	OCTBI,CALMI,EUPSC	KQ417921:174764..351405	176641	OCTBI_Ocbimv22012609m.p,OCTBI_Ocbimv22012610m.p,OCTBI_Ocbimv22012611m.p,OCTBI_Ocbimv22012614m.p
13811	OCTBI	13812(EUPSC)	OCTBI,EUPSC	KQ418587:20690..296408	275718	OCTBI_Ocbimv22018244m.p,OCTBI_Ocbimv22018246m.p,OCTBI_Ocbimv22018249m.p,OCTBI_Ocbimv22018252m.p
2915	OCTBI	2916(CALMI)	OCTBI,CALMI	KQ417756:67527..138423	70896	OCTBI_Ocbimv22011167m.p,OCTBI_Ocbimv22011172m.p,OCTBI_Ocbimv22011173m.p
3180	OCTBI	4352(EUPSC)	OCTBI,EUPSC	KQ419215:82197..413247	331050	OCTBI_Ocbimv22022397m.p,OCTBI_Ocbimv22022398m.p,OCTBI_Ocbimv22022399m.p,OCTBI_Ocbimv22022391m.p,OCTBI_Ocbimv22022392m.p,OCTBI_Ocbimv22022394m.p,OCTBI_Ocbimv22022396m.p,OCTBI_Ocbimv22022400m.p,OCTBI_Ocbimv22022403m.p,OCTBI_Ocbimv22022402m.p,OCTBI_Ocbimv22022404m.p
3554	OCTBI	3555(CALMI),4457(EUPSC)	OCTBI,CALMI,EUPSC	KQ431974:32..142539	142507	OCTBI_Ocbimv22021055m.p,OCTBI_Ocbimv22021056m.p,OCTBI_Ocbimv22021057m.p,OCTBI_Ocbimv22021058m.p,OCTBI_Ocbimv22021059m.p,OCTBI_Ocbimv22021061m.p,OCTBI_Ocbimv22021066m.p
2785	OCTBI	2784(CALMI)	OCTBI,CALMI	KQ421208:6160..324494	318334	OCTBI_Ocbimv22031262m.p,OCTBI_Ocbimv22031263m.p,OCTBI_Ocbimv22031264m.p
3521	CALMI	3520(OCTBI)	CALMI,OCTBI	oct005787F:5985..54563	48578	CALMI_Omin013805p,CALMI_Omin013807p,CALMI_Omin013806p
3370	OCTBI	3371(CALMI)	CALMI,OCTBI	KQ426557:93982..130896	36914	OCTBI_Ocbimv22008069m.p,OCTBI_Ocbimv22008070m.p,OCTBI_Ocbimv22008071m.p
3123	OCTBI	3122(CALMI),4279(EUPSC)	EUPSC,CALMI,OCTBI	KQ417240:349697..523328	173631	OCTBI_Ocbimv22005320m.p,OCTBI_Ocbimv22005324m.p,OCTBI_Ocbimv22005325m.p,OCTBI_Ocbimv22005327m.p
2933	CALMI	2934(OCTBI)	CALMI,OCTBI	oct007209F:15263..155516	140253	CALMI_Omin012641p,CALMI_Omin012642p,CALMI_Omin012643p
4485	CALMI	4484(EUPSC)	CALMI,EUPSC	oct000361F:637923..709349	71426	CALMI_Omin007362p,CALMI_Omin007364p,CALMI_Omin007367p,CALMI_Omin007365p
14218	OCTBI	14217(EUPSC)	EUPSC,OCTBI	KQ419577:15014..294832	279818	OCTBI_Ocbimv22024405m.p,OCTBI_Ocbimv22024407m.p,OCTBI_Ocbimv22024408m.p,OCTBI_Ocbimv22024413m.p
2778	OCTBI	2779(CALMI)	OCTBI,CALMI	KQ425188:62098..162063	99965	OCTBI_Ocbimv22004013m.p,OCTBI_Ocbimv22004014m.p,OCTBI_Ocbimv22004017m.p
4381	EUPSC	2543(OCTBI)	CALMI,OCTBI,EUPSC	Lachesis_group33__48_contigs__length_77384337:24376857..27778854	3401997	EUPSC_cluster_1534,EUPSC_cluster_28861,EUPSC_cluster_28862,EUPSC_cluster_4867,EUPSC_cluster_4386,EUPSC_cluster_22158,EUPSC_cluster_10652,EUPSC_cluster_8108,EUPSC_cluster_5171	PF00341 PDGF/VEGF domain; PF03953 Tubulin C-terminal domain; PF00091 Tubulin/FtsZ family, GTPase domain; PF00650 CRAL/TRIO domain-PF00635 MSP (Major sperm protein) domain; PF16178 Dimerisation domain of Ca+-activated chloride-channel, anoctamin-PF04547 Calcium-activated chloride channel; PF03189 Otopetrin; PF07650 KH domain-PF00189 Ribosomal protein S3, C-terminal domain-PF00078 Reverse transcrip…
2654	OCTBI	2653(CALMI)	OCTBI,CALMI	KQ420036:21418..68215	46797	OCTBI_Ocbimv22026392m.p,OCTBI_Ocbimv22026395m.p,OCTBI_Ocbimv22026396m.p
14269	EUPSC	14270(OCTBI)	EUPSC,OCTBI	Lachesis_group21__43_contigs__length_103963499:89833723..90163173	329450	EUPSC_cluster_425,EUPSC_cluster_454,EUPSC_cluster_21364	; ; PF01094 Receptor family ligand binding region-PF07562 Nine Cysteines Domain of family 3 GPCR
3012	CALMI	3011(OCTBI)	OCTBI,CALMI	oct006260F:79531..127897	48366	CALMI_Omin015949p,CALMI_Omin015948p,CALMI_Omin015947p
14548	EUPSC	14547(OCTBI)	OCTBI,EUPSC	Lachesis_group5__70_contigs__length_158228327:44947951..45198707	250756	EUPSC_cluster_28320,EUPSC_cluster_28319,EUPSC_cluster_28318,EUPSC_cluster_611	; ; ; PF07679 Immunoglobulin I-set domain-PF07679 Immunoglobulin I-set domain-PF13895 Immunoglobulin domain-PF13927 Immunoglobulin domain-PF13927 Immunoglobulin domain-PF13927 Immunoglobulin domain-PF13927 Immunoglobulin domain-PF00041 Fibronectin type III domain
14542	OCTBI	14541(EUPSC)	EUPSC,OCTBI	KQ423432:123568..561949	438381	OCTBI_Ocbimv22038660m.p,OCTBI_Ocbimv22038661m.p,OCTBI_Ocbimv22038666m.p,OCTBI_Ocbimv22038668m.p,OCTBI_Ocbimv22038669m.p,OCTBI_Ocbimv22038670m.p
4371	EUPSC	3336(CALMI)	EUPSC,OCTBI,CALMI	Lachesis_group23__35_contigs__length_97660015:4284983..4543584	258601	EUPSC_cluster_5533,EUPSC_cluster_2536,EUPSC_cluster_4762,EUPSC_cluster_4763	PF01594 AI-2E family transporter; PF04421 Mss4 protein; PF10187 N-terminal domain of NEFA-interacting nuclear protein NIP30; PF10187 N-terminal domain of NEFA-interacting nuclear protein NIP30
2918	CALMI	2917(OCTBI)	CALMI,OCTBI,EUPSC	oct013745F:2172..85366	83194	CALMI_Omin027363p,CALMI_Omin027365p,CALMI_Omin027364p
3929	OCTBI	3928(CALMI)	CALMI,OCTBI	KQ416508:857132..967945	110813	OCTBI_Ocbimv22034065m.p,OCTBI_Ocbimv22034064m.p,OCTBI_Ocbimv22034069m.p,OCTBI_Ocbimv22034070m.p
2953	OCTBI	2952(CALMI)	CALMI,OCTBI	KQ416453:143877..255816	111939	OCTBI_Ocbimv22032855m.p,OCTBI_Ocbimv22032859m.p,OCTBI_Ocbimv22032860m.p,OCTBI_Ocbimv22032861m.p
2788	CALMI	4400(EUPSC)	OCTBI,CALMI,EUPSC	oct013132F:16528..43029	26501	CALMI_Omin026324p,CALMI_Omin026326p,CALMI_Omin026325p
4181	EUPSC	3471(CALMI),3470(OCTBI)	CALMI,OCTBI,EUPSC	Lachesis_group17__52_contigs__length_118315660:58333045..58753276	420231	EUPSC_cluster_4203,EUPSC_cluster_20660,EUPSC_cluster_4963,EUPSC_cluster_11221	PF07992 Pyridine nucleotide-disulphide oxidoreductase-PF00462 Glutaredoxin; ; PF12796 Ankyrin repeats (3 copies)-PF12796 Ankyrin repeats (3 copies)-PF12796 Ankyrin repeats (3 copies)-PF12796 Ankyrin repeats (3 copies)-PF00023 Ankyrin repeat-PF02204 Vacuolar sorting protein 9 (VPS9) domain;
3743	CALMI	3744(OCTBI)	OCTBI,CALMI	oct004104F:999..262290	261291	CALMI_Omin009095p,CALMI_Omin009100p,CALMI_Omin009099p,CALMI_Omin009096p,CALMI_Omin009102p,CALMI_Omin009097p,CALMI_Omin009098p
2893	CALMI	2894(OCTBI),4394(EUPSC)	OCTBI,CALMI,EUPSC	oct001666F:1952..157054	155102	CALMI_Omin003398p,CALMI_Omin003399p,CALMI_Omin003401p
6872	EUPSC	14292(OCTBI)	EUPSC,OCTBI	Lachesis_group10__55_contigs__length_138218214:63586489..65567767	1981278	EUPSC_cluster_9894,EUPSC_cluster_2059,EUPSC_cluster_727,EUPSC_cluster_845,EUPSC_cluster_846,EUPSC_cluster_3654,EUPSC_cluster_22767,EUPSC_cluster_11342	PF00082 Subtilase family-PF01483 Proprotein convertase P-domain-PF16470 Peptidase S8 pro-domain; PF01391 Collagen triple helix repeat (20 copies)-PF01391 Collagen triple helix repeat (20 copies)-PF01391 Collagen triple helix repeat (20 copies)-PF01391 Collagen triple helix repeat (20 copies)-PF01391 Collagen triple helix repeat (20 copies)-PF01391 Collagen triple helix repeat (20 copies)-PF01391 …
3534	CALMI	3533(OCTBI),4324(EUPSC)	CALMI,OCTBI,EUPSC	oct004660F:25947..238541	212594	CALMI_Omin007845p,CALMI_Omin007846p,CALMI_Omin007843p,CALMI_Omin007844p
3871	CALMI	3872(OCTBI),4504(EUPSC)	OCTBI,CALMI,EUPSC	oct002408F:64867..364693	299826	CALMI_Omin003653p,CALMI_Omin003655p,CALMI_Omin003658p,CALMI_Omin003657p,CALMI_Omin003652p
1290	EUPSC	3781(OCTBI)	EUPSC,OCTBI	Lachesis_group28__49_contigs__length_91470296:50590538..51902222	1311684	EUPSC_cluster_10006,EUPSC_cluster_26171,EUPSC_cluster_11936,EUPSC_cluster_16485,EUPSC_cluster_11650,EUPSC_cluster_2079,EUPSC_cluster_2799,EUPSC_cluster_19099,EUPSC_cluster_10794,EUPSC_cluster_21548	PF07716 Basic region leucine zipper; PF07716 Basic region leucine zipper; PF01161 Phosphatidylethanolamine-binding protein; PF00271 Helicase conserved C-terminal domain-PF00270 DEAD/DEAH box helicase; PF00752 XPG N-terminal domain-PF00867 XPG I-region; PF00069 Protein kinase domain; PF00069 Protein kinase domain-PF00078 Reverse transcriptase (RNA-dependent DNA polymerase); PF12906 RING-variant do…
4301	EUPSC	2992(CALMI),2993(OCTBI)	OCTBI,CALMI,EUPSC	Lachesis_group9__67_contigs__length_144638433:117203741..117434439	230698	EUPSC_cluster_20175,EUPSC_cluster_5934,EUPSC_cluster_15743	PF00651 BTB/POZ domain; ; PF08613 Cyclin
2855	OCTBI	4331(EUPSC)	OCTBI,CALMI,EUPSC	KQ415902:529..650613	650084	OCTBI_Ocbimv22012120m.p,OCTBI_Ocbimv22012124m.p,OCTBI_Ocbimv22012125m.p,OCTBI_Ocbimv22012126m.p,OCTBI_Ocbimv22012127m.p,OCTBI_Ocbimv22012138m.p,OCTBI_Ocbimv22012139m.p,OCTBI_Ocbimv22012140m.p,OCTBI_Ocbimv22012136m.p,OCTBI_Ocbimv22012137m.p,OCTBI_Ocbimv22012133m.p,OCTBI_Ocbimv22012134m.p,OCTBI_Ocbimv22012128m.p,OCTBI_Ocbimv22012130m.p
2058	CALMI	2507(OCTBI)	CALMI,OCTBI	oct006084F:26740..118363	91623	CALMI_Omin015567p,CALMI_Omin015571p,CALMI_Omin015568p,CALMI_Omin015570p
2995	CALMI	2994(OCTBI)	CALMI,OCTBI	oct004532F:48152..224394	176242	CALMI_Omin004329p,CALMI_Omin004331p,CALMI_Omin004327p,CALMI_Omin004328p,CALMI_Omin004330p
3344	CALMI	3343(OCTBI)	CALMI,OCTBI	oct010604F:35476..117770	82294	CALMI_Omin025690p,CALMI_Omin025691p,CALMI_Omin025692p
14393	EUPSC	14394(OCTBI)	EUPSC,OCTBI	Lachesis_group31__46_contigs__length_81539927:16977978..17677115	699137	EUPSC_cluster_2126,EUPSC_cluster_29229,EUPSC_cluster_9779,EUPSC_cluster_6750	PF02138 Beige/BEACH domain; PF02221 ML domain; PF02734 DAK2 domain-PF00078 Reverse transcriptase (RNA-dependent DNA polymerase)-PF02733 Dak1 domain-PF02733 Dak1 domain;
9037	EUPSC	3304(OCTBI)	OCTBI,EUPSC	Lachesis_group16__53_contigs__length_120303996:83636242..84836147	1199905	EUPSC_cluster_7562,EUPSC_cluster_13047,EUPSC_cluster_2718,EUPSC_cluster_4327,EUPSC_cluster_12231,EUPSC_cluster_2649,EUPSC_cluster_11636,EUPSC_cluster_7634,EUPSC_cluster_175,EUPSC_cluster_1317	PF06159 Protein of unknown function (DUF974); PF01758 Sodium Bile acid symporter family; PF00025 ADP-ribosylation factor family-PF00643 B-box zinc finger; PF00071 Ras family; PF00071 Ras family; ; PF03997 VPS28 protein; PF13499 EF-hand domain pair; PF00076 RNA recognition motif. (a.k.a. RRM, RBD, or RNP domain)-PF00076 RNA recognition motif. (a.k.a. RRM, RBD, or RNP domain); PF00515 Tetratricopep…
4192	EUPSC	4191(CALMI)	EUPSC,CALMI	Lachesis_group18__53_contigs__length_106174747:84274855..85121226	846371	EUPSC_cluster_20479,EUPSC_cluster_3689,EUPSC_cluster_13317	; PF16885 Voltage-gated calcium channel subunit alpha, C-term-PF08763 Voltage gated calcium channel IQ domain-PF00520 Ion transport protein-PF00520 Ion transport protein-PF00520 Ion transport protein-PF00520 Ion transport protein-PF16905 Voltage-dependent L-type calcium channel, IQ-associated; PF01532 Glycosyl hydrolase family 47
13809	OCTBI	13810(EUPSC)	OCTBI,EUPSC	KQ426075:507408..566443	59035	OCTBI_Ocbimv22006710m.p,OCTBI_Ocbimv22006714m.p,OCTBI_Ocbimv22006715m.p
3801	CALMI	3800(OCTBI)	EUPSC,OCTBI,CALMI	oct009400F:77..39944	39867	CALMI_Omin011548p,CALMI_Omin011550p,CALMI_Omin011547p
3489	OCTBI	3488(CALMI)	CALMI,OCTBI	KQ427096:176951..216694	39743	OCTBI_Ocbimv22009715m.p,OCTBI_Ocbimv22009716m.p,OCTBI_Ocbimv22009717m.p,OCTBI_Ocbimv22009719m.p
3796	OCTBI	3797(CALMI)	OCTBI,CALMI	KQ422556:248445..436057	187612	OCTBI_Ocbimv22035800m.p,OCTBI_Ocbimv22035801m.p,OCTBI_Ocbimv22035803m.p,OCTBI_Ocbimv22035806m.p,OCTBI_Ocbimv22035807m.p
3747	CALMI	3748(OCTBI)	OCTBI,CALMI	oct000323F:1744..68504	66760	CALMI_Omin006399p,CALMI_Omin006398p,CALMI_Omin006401p
3952	OCTBI	3951(CALMI)	CALMI,OCTBI	KQ418840:1560381..1740865	180484	OCTBI_Ocbimv22019992m.p,OCTBI_Ocbimv22019995m.p,OCTBI_Ocbimv22019996m.p
2897	OCTBI	2898(CALMI)	OCTBI,CALMI	KQ416279:771261..884670	113409	OCTBI_Ocbimv22029014m.p,OCTBI_Ocbimv22029015m.p,OCTBI_Ocbimv22029016m.p,OCTBI_Ocbimv22029017m.p
3731	CALMI	4268(EUPSC),3730(OCTBI)	EUPSC,CALMI,OCTBI	oct000191F:90069..792872	702803	CALMI_Omin000274p,CALMI_Omin000272p,CALMI_Omin000276p,CALMI_Omin000275p,CALMI_Omin000273p
3144	CALMI	3143(OCTBI),4351(EUPSC)	CALMI,OCTBI,EUPSC	oct002141F:57678..365859	308181	CALMI_Omin004073p,CALMI_Omin004074p,CALMI_Omin004071p,CALMI_Omin004072p
2846	CALMI	2847(OCTBI)	CALMI,OCTBI	oct017634F:34790..83834	49044	CALMI_Omin019475p,CALMI_Omin019477p,CALMI_Omin019476p
14350	OCTBI	14351(EUPSC)	OCTBI,EUPSC	KQ418552:558091..634062	75971	OCTBI_Ocbimv22017870m.p,OCTBI_Ocbimv22017871m.p,OCTBI_Ocbimv22017874m.p
14217	EUPSC	14218(OCTBI)	OCTBI,EUPSC	Lachesis_group20__56_contigs__length_105542877:21344810..21474616	129806	EUPSC_cluster_7960,EUPSC_cluster_11964,EUPSC_cluster_2699	PF03747 ADP-ribosylglycohydrolase; PF03747 ADP-ribosylglycohydrolase; PF00620 RhoGAP domain
4247	EUPSC	4248(CALMI)	CALMI,EUPSC	Lachesis_group23__35_contigs__length_97660015:65322075..65334633	12558	EUPSC_cluster_11468,EUPSC_cluster_3534,EUPSC_cluster_5341	PF10238 E2F-associated phosphoprotein; PF10238 E2F-associated phosphoprotein; PF07915 Glucosidase II beta subunit-like protein
3892	OCTBI	3891(CALMI)	CALMI,OCTBI	KQ428349:246126..382489	136363	OCTBI_Ocbimv22013035m.p,OCTBI_Ocbimv22013036m.p,OCTBI_Ocbimv22013039m.p,OCTBI_Ocbimv22013041m.p
4408	CALMI	4407(EUPSC)	EUPSC,CALMI,OCTBI	oct002996F:11733..147915	136182	CALMI_Omin009076p,CALMI_Omin009074p,CALMI_Omin009077p
14547	OCTBI	14548(EUPSC)	OCTBI,EUPSC	KQ420415:12800..147839	135039	OCTBI_Ocbimv22027979m.p,OCTBI_Ocbimv22027984m.p,OCTBI_Ocbimv22027986m.p
4296	EUPSC	2623(OCTBI)	EUPSC,OCTBI	Lachesis_group2__55_contigs__length_182973478:8936095..10849438	1913343	EUPSC_cluster_13674,EUPSC_cluster_24365,EUPSC_cluster_1343,EUPSC_cluster_1183,EUPSC_cluster_12766,EUPSC_cluster_7801,EUPSC_cluster_24363,EUPSC_cluster_2848,EUPSC_cluster_9185,EUPSC_cluster_9900,EUPSC_cluster_13900,EUPSC_cluster_29115,EUPSC_cluster_11670,EUPSC_cluster_20014,EUPSC_cluster_3970,EUPSC_cluster_6601,EUPSC_cluster_3228	PF12796 Ankyrin repeats (3 copies)-PF12796 Ankyrin repeats (3 copies)-PF12796 Ankyrin repeats (3 copies)-PF13923 Zinc finger, C3HC4 type (RING finger)-PF06701 Mib_herc2-PF06701 Mib_herc2-PF13920 Zinc finger, C3HC4 type (RING finger)-PF13920 Zinc finger, C3HC4 type (RING finger)-PF00569 Zinc finger, ZZ type; PF00641 Zn-finger in Ran binding protein and others-PF00641 Zn-finger in Ran binding prote…
14580	EUPSC	14579(OCTBI)	OCTBI,EUPSC	Lachesis_group11__73_contigs__length_131769366:86942555..87778744	836189	EUPSC_cluster_1760,EUPSC_cluster_1927,EUPSC_cluster_14885,EUPSC_cluster_1159,EUPSC_cluster_17332	PF00620 RhoGAP domain-PF13716 Divergent CRAL/TRIO domain; PF14604 Variant SH3 domain-PF02218 Repeat in HS1/Cortactin-PF02218 Repeat in HS1/Cortactin-PF02218 Repeat in HS1/Cortactin-PF02218 Repeat in HS1/Cortactin-PF02218 Repeat in HS1/Cortactin-PF02218 Repeat in HS1/Cortactin-PF02218 Repeat in HS1/Cortactin-PF02218 Repeat in HS1/Cortactin; PF09762 Coiled-coil domain-containing protein (DUF2037); …
2549	CALMI	2550(OCTBI)	OCTBI,CALMI	oct003558F:2021..96572	94551	CALMI_Omin001663p,CALMI_Omin001662p,CALMI_Omin001664p
3250	CALMI	3249(OCTBI),4329(EUPSC)	EUPSC,OCTBI,CALMI	oct005131F:41073..240911	199838	CALMI_Omin014380p,CALMI_Omin014383p,CALMI_Omin014379p,CALMI_Omin014378p
14044	EUPSC	14043(OCTBI)	EUPSC,OCTBI	Lachesis_group14__44_contigs__length_129294686:60280255..60552810	272555	EUPSC_cluster_9274,EUPSC_cluster_21529,EUPSC_cluster_13194,EUPSC_cluster_4779	; PF00538 linker histone H1 and H5 family; PF06840 Protein of unknown function (DUF1241); PF01412 Putative GTPase activating protein for Arf
4231	CALMI	4232(EUPSC)	EUPSC,CALMI,OCTBI	oct001778F:130416..375511	245095	CALMI_Omin007297p,CALMI_Omin007299p,CALMI_Omin007298p
2858	OCTBI	2859(CALMI)	OCTBI,CALMI	KQ420925:35313..60557	25244	OCTBI_Ocbimv22030232m.p,OCTBI_Ocbimv22030233m.p,OCTBI_Ocbimv22030234m.p
2869	OCTBI	2870(CALMI)	CALMI,OCTBI	KQ416810:967989..1062832	94843	OCTBI_Ocbimv22039628m.p,OCTBI_Ocbimv22039629m.p,OCTBI_Ocbimv22039630m.p,OCTBI_Ocbimv22039634m.p
2813	CALMI	2814(OCTBI)	CALMI,OCTBI	oct003055F:4200..182774	178574	CALMI_Omin000625p,CALMI_Omin000623p,CALMI_Omin000624p
3001	CALMI	3000(OCTBI)	EUPSC,CALMI,OCTBI	oct004562F:39119..237478	198359	CALMI_Omin002858p,CALMI_Omin002857p,CALMI_Omin002856p,CALMI_Omin002855p
3610	OCTBI	4467(EUPSC),3609(CALMI)	OCTBI,CALMI,EUPSC	KQ416779:764260..921116	156856	OCTBI_Ocbimv22039116m.p,OCTBI_Ocbimv22039119m.p,OCTBI_Ocbimv22039121m.p,OCTBI_Ocbimv22039124m.p,OCTBI_Ocbimv22039125m.p,OCTBI_Ocbimv22039128m.p,OCTBI_Ocbimv22039122m.p
2835	OCTBI	2834(CALMI)	OCTBI,CALMI	KQ415684:241172..360128	118956	OCTBI_Ocbimv22018673m.p,OCTBI_Ocbimv22018675m.p,OCTBI_Ocbimv22018677m.p
2998	CALMI	2999(OCTBI)	CALMI,OCTBI	oct002950F:1538..104403	102865	CALMI_Omin005874p,CALMI_Omin005876p,CALMI_Omin005873p
13960	EUPSC	13961(OCTBI)	EUPSC,OCTBI	Lachesis_group9__67_contigs__length_144638433:129516665..129924588	407923	EUPSC_cluster_3317,EUPSC_cluster_51,EUPSC_cluster_18104	PF15433 Mitochondrial 28S ribosomal protein S31; PF02207 Putative zinc finger in N-recognin (UBR box)-PF13764 E3 ubiquitin-protein ligase UBR4; PF13764 E3 ubiquitin-protein ligase UBR4
3300	CALMI	3301(OCTBI)	OCTBI,CALMI	oct012154F:5872..110083	104211	CALMI_Omin028524p,CALMI_Omin028523p,CALMI_Omin028525p
3906	OCTBI	3907(CALMI)	OCTBI,CALMI	KQ426686:10801..47795	36994	OCTBI_Ocbimv22008548m.p,OCTBI_Ocbimv22008549m.p,OCTBI_Ocbimv22008550m.p
3426	CALMI	3425(OCTBI)	CALMI,OCTBI	oct017147F:18629..62851	44222	CALMI_Omin017602p,CALMI_Omin017601p,CALMI_Omin017603p
2566	OCTBI	2567(CALMI),13874(EUPSC)	OCTBI,CALMI,EUPSC	KQ419916:153519..227178	73659	OCTBI_Ocbimv22025863m.p,OCTBI_Ocbimv22025864m.p,OCTBI_Ocbimv22025865m.p,OCTBI_Ocbimv22025868m.p,OCTBI_Ocbimv22025862m.p
14396	OCTBI	14395(EUPSC)	EUPSC,OCTBI	KQ415726:154664..242451	87787	OCTBI_Ocbimv22031810m.p,OCTBI_Ocbimv22031811m.p,OCTBI_Ocbimv22031812m.p
2705	OCTBI	2932(CALMI),2704(CALMI)	EUPSC,OCTBI,CALMI	KQ421083:178242..558751	380509	OCTBI_Ocbimv22030747m.p,OCTBI_Ocbimv22030748m.p,OCTBI_Ocbimv22030749m.p,OCTBI_Ocbimv22030750m.p,OCTBI_Ocbimv22030751m.p,OCTBI_Ocbimv22030752m.p,OCTBI_Ocbimv22030754m.p,OCTBI_Ocbimv22030755m.p,OCTBI_Ocbimv22030745m.p,OCTBI_Ocbimv22030746m.p
14347	EUPSC	14348(OCTBI)	EUPSC,OCTBI	Lachesis_group9__67_contigs__length_144638433:42298941..42840639	541698	EUPSC_cluster_10757,EUPSC_cluster_14377,EUPSC_cluster_24142	PF00400 WD domain, G-beta repeat-PF00400 WD domain, G-beta repeat-PF00400 WD domain, G-beta repeat-PF00400 WD domain, G-beta repeat; PF02256 Iron hydrogenase small subunit-PF02906 Iron only hydrogenase large subunit, C-terminal domain; PF06775 Putative adipose-regulatory protein (Seipin)-PF13639 Ring finger domain
3724	CALMI	3725(OCTBI)	OCTBI,CALMI	oct002706F:58639..190728	132089	CALMI_Omin001677p,CALMI_Omin001675p,CALMI_Omin001679p,CALMI_Omin001676p,CALMI_Omin001678p
2941	CALMI	2942(OCTBI)	EUPSC,OCTBI,CALMI	oct011644F:5729..104608	98879	CALMI_Omin027007p,CALMI_Omin027005p,CALMI_Omin027006p,CALMI_Omin027008p
2937	OCTBI	2938(CALMI)	CALMI,OCTBI	KQ416719:201740..248661	46921	OCTBI_Ocbimv22037996m.p,OCTBI_Ocbimv22038001m.p,OCTBI_Ocbimv22038005m.p
3127	OCTBI	3128(CALMI)	CALMI,OCTBI	KQ423598:182076..247117	65041	OCTBI_Ocbimv22039261m.p,OCTBI_Ocbimv22039265m.p,OCTBI_Ocbimv22039266m.p,OCTBI_Ocbimv22039267m.p
3100	OCTBI	3099(CALMI)	CALMI,OCTBI	KQ430345:53093..113065	59972	OCTBI_Ocbimv22017537m.p,OCTBI_Ocbimv22017539m.p,OCTBI_Ocbimv22017540m.p,OCTBI_Ocbimv22017541m.p
3230	OCTBI	3231(CALMI),4368(EUPSC)	EUPSC,CALMI,OCTBI	KQ420375:299273..1253940	954667	OCTBI_Ocbimv22027820m.p,OCTBI_Ocbimv22027824m.p,OCTBI_Ocbimv22027825m.p,OCTBI_Ocbimv22027828m.p,OCTBI_Ocbimv22027830m.p,OCTBI_Ocbimv22027816m.p
14380	EUPSC	2686(OCTBI)	EUPSC,OCTBI	Lachesis_group13__58_contigs__length_132030582:46809942..48911939	2101997	EUPSC_cluster_12880,EUPSC_cluster_21178,EUPSC_cluster_21176,EUPSC_cluster_854,EUPSC_cluster_4664,EUPSC_cluster_21175,EUPSC_cluster_6080	; ; PF01066 CDP-alcohol phosphatidyltransferase; PF10195 DNA-binding nuclear phosphoprotein p8; ; ; PF00665 Integrase core domain
3932	OCTBI	14289(EUPSC),3931(CALMI)	OCTBI,CALMI,EUPSC	KQ428707:27414..136373	108959	OCTBI_Ocbimv22013894m.p,OCTBI_Ocbimv22013895m.p,OCTBI_Ocbimv22013896m.p,OCTBI_Ocbimv22013892m.p,OCTBI_Ocbimv22013893m.p
4405	EUPSC	2722(CALMI)	EUPSC,CALMI,OCTBI	Lachesis_group23__35_contigs__length_97660015:5123157..5171128	47971	EUPSC_cluster_8294,EUPSC_cluster_4950,EUPSC_cluster_3330	PF03874 RNA polymerase Rpb4; PF10363 Required for nuclear transport of RNA pol II C-terminus 1; PF09732 Cactus-binding C-terminus of cactin protein-PF10312 Conserved mid region of cactin
14194	OCTBI	14193(EUPSC)	OCTBI,EUPSC	KQ422919:794695..1615849	821154	OCTBI_Ocbimv22037078m.p,OCTBI_Ocbimv22037079m.p,OCTBI_Ocbimv22037080m.p,OCTBI_Ocbimv22037082m.p,OCTBI_Ocbimv22037084m.p,OCTBI_Ocbimv22037088m.p,OCTBI_Ocbimv22037089m.p,OCTBI_Ocbimv22037091m.p
14550	EUPSC	14551(OCTBI)	OCTBI,EUPSC	Lachesis_group18__53_contigs__length_106174747:36985350..37154060	168710	EUPSC_cluster_2723,EUPSC_cluster_14803,EUPSC_cluster_11634	PF00134 Cyclin, N-terminal domain; PF01926 50S ribosome-binding GTPase-PF06071 Protein of unknown function (DUF933); PF06456 Arfaptin-like domain-PF04629 Islet cell autoantigen ICA69, C-terminal domain-PF04629 Islet cell autoantigen ICA69, C-terminal domain
13904	EUPSC	13905(OCTBI)	EUPSC,OCTBI	Lachesis_group9__67_contigs__length_144638433:85740859..86202679	461820	EUPSC_cluster_2074,EUPSC_cluster_17101,EUPSC_cluster_5327,EUPSC_cluster_5259,EUPSC_cluster_17102,EUPSC_cluster_17104	PF07539 Down-regulated in metastasis; PF10629 Protein of unknown function (DUF2475); PF00520 Ion transport protein-PF12796 Ankyrin repeats (3 copies); PF13802 Galactose mutarotase-like-PF01055 Glycosyl hydrolases family 31-PF00088 Trefoil (P-type) domain-PF16863 N-terminal barrel of NtMGAM and CtMGAM, maltase-glucoamylase; PF01055 Glycosyl hydrolases family 31-PF00088 Trefoil (P-type) domain; PF0…
4459	EUPSC	3235(CALMI),3234(OCTBI)	CALMI,OCTBI,EUPSC	Lachesis_group11__73_contigs__length_131769366:18037600..18196188	158588	EUPSC_cluster_3578,EUPSC_cluster_14483,EUPSC_cluster_7118	PF05773 RWD domain; PF04051 Transport protein particle (TRAPP) component; PF00351 Biopterin-dependent aromatic amino acid hydroxylase-PF01842 ACT domain
3606	CALMI	3222(OCTBI)	CALMI,OCTBI	oct012658F:51677..93289	41612	CALMI_Omin027478p,CALMI_Omin027477p,CALMI_Omin027480p
4161	CALMI	4162(EUPSC)	EUPSC,CALMI	oct001332F:42317..411865	369548	CALMI_Omin006910p,CALMI_Omin006911p,CALMI_Omin006912p
3910	OCTBI	4465(EUPSC),3909(CALMI)	EUPSC,OCTBI,CALMI	KQ419533:321750..427768	106018	OCTBI_Ocbimv22024082m.p,OCTBI_Ocbimv22024084m.p,OCTBI_Ocbimv22024087m.p,OCTBI_Ocbimv22024088m.p,OCTBI_Ocbimv22024090m.p
4223	EUPSC	3757(OCTBI)	OCTBI,EUPSC	Lachesis_group6__62_contigs__length_156955521:112790437..114471121	1680684	EUPSC_cluster_3516,EUPSC_cluster_2951,EUPSC_cluster_6287,EUPSC_cluster_1810,EUPSC_cluster_12236,EUPSC_cluster_6746,EUPSC_cluster_10557,EUPSC_cluster_28502,EUPSC_cluster_10801	PF15478 Family of unknown function with LKAAEAR motif; ; PF00439 Bromodomain-PF01753 MYND finger-PF00855 PWWP domain; ; PF00673 ribosomal L5P family C-terminus-PF00281 Ribosomal protein L5; PF00620 RhoGAP domain; PF12171 Zinc-finger double-stranded RNA-binding-PF12874 Zinc-finger of C2H2 type-PF12874 Zinc-finger of C2H2 type; PF03798 TLC domain-PF08390 TRAM1-like protein;
2698	OCTBI	2989(CALMI),4306(EUPSC)	OCTBI,CALMI,EUPSC	KQ419640:26671..134214	107543	OCTBI_Ocbimv22024841m.p,OCTBI_Ocbimv22024842m.p,OCTBI_Ocbimv22024843m.p,OCTBI_Ocbimv22024847m.p,OCTBI_Ocbimv22024848m.p,OCTBI_Ocbimv22024850m.p,OCTBI_Ocbimv22024849m.p
14086	EUPSC	14286(OCTBI),14085(OCTBI)	EUPSC,OCTBI	Lachesis_group31__46_contigs__length_81539927:3439682..4984248	1544566	EUPSC_cluster_79,EUPSC_cluster_16098,EUPSC_cluster_22648,EUPSC_cluster_14392,EUPSC_cluster_14645,EUPSC_cluster_16060,EUPSC_cluster_22650,EUPSC_cluster_11242,EUPSC_cluster_11204,EUPSC_cluster_22654,EUPSC_cluster_12900,EUPSC_cluster_11049,EUPSC_cluster_22656	; ; ; ; ; ; ; ; ; ; ; ;
3780	CALMI	2557(OCTBI),4216(EUPSC)	EUPSC,CALMI,OCTBI	oct011294F:880..87243	86363	CALMI_Omin025463p,CALMI_Omin025466p,CALMI_Omin025464p
3557	OCTBI	3556(CALMI)	OCTBI,CALMI	KQ418333:26698..81161	54463	OCTBI_Ocbimv22016251m.p,OCTBI_Ocbimv22016252m.p,OCTBI_Ocbimv22016254m.p
14090	OCTBI	14089(EUPSC)	OCTBI,EUPSC	KQ416197:31016..104279	73263	OCTBI_Ocbimv22026689m.p,OCTBI_Ocbimv22026693m.p,OCTBI_Ocbimv22026694m.p
4468	EUPSC	3861(CALMI),3860(OCTBI)	CALMI,OCTBI,EUPSC	Lachesis_group30__51_contigs__length_87052432:12076657..12491498	414841	EUPSC_cluster_27112,EUPSC_cluster_2462,EUPSC_cluster_105,EUPSC_cluster_5876,EUPSC_cluster_15457,EUPSC_cluster_11940	PF03446 NAD binding domain of 6-phosphogluconate dehydrogenase-PF00393 6-phosphogluconate dehydrogenase, C-terminal domain; PF03839 Translocation protein Sec62; PF00085 Thioredoxin; PF03009 Glycerophosphoryl diester phosphodiesterase family; PF08606 Prp19/Pso4-like-PF00400 WD domain, G-beta repeat-PF00400 WD domain, G-beta repeat-PF00400 WD domain, G-beta repeat-PF00400 WD domain, G-beta repeat-P…
2552	CALMI	2551(OCTBI)	OCTBI,CALMI	oct012229F:7647..28531	20884	CALMI_Omin027708p,CALMI_Omin027706p,CALMI_Omin027709p,CALMI_Omin027707p
14337	EUPSC	2667(OCTBI)	EUPSC,OCTBI,CALMI	Lachesis_group33__48_contigs__length_77384337:29126742..29692855	566113	EUPSC_cluster_18646,EUPSC_cluster_6867,EUPSC_cluster_26963	PF06733 DEAD_2-PF13307 Helicase C-terminal domain; PF08158 NUC130/3NT domain-PF05285 SDA1;
2759	OCTBI	2758(CALMI)	CALMI,OCTBI	KQ418971:434935..613737	178802	OCTBI_Ocbimv22020874m.p,OCTBI_Ocbimv22020879m.p,OCTBI_Ocbimv22020881m.p
14559	EUPSC	3528(OCTBI)	OCTBI,CALMI,EUPSC	Lachesis_group27__44_contigs__length_93323795:23095906..23339220	243314	EUPSC_cluster_20822,EUPSC_cluster_210,EUPSC_cluster_11093,EUPSC_cluster_6381,EUPSC_cluster_10745	PF14911 S-phase genomic integrity recombination mediator, C-terminal-PF14910 S-phase genomic integrity recombination mediator, N-terminal; PF08597 Translation initiation factor eIF3 subunit; PF00903 Glyoxalase/Bleomycin resistance protein/Dioxygenase superfamily; PF12697 Alpha/beta hydrolase family; PF00561 alpha/beta hydrolase fold
14426	EUPSC	14427(OCTBI)	EUPSC,OCTBI	Lachesis_group16__53_contigs__length_120303996:3229..159764	156535	EUPSC_cluster_5133,EUPSC_cluster_8220,EUPSC_cluster_1144	PF13855 Leucine rich repeat; PF03148 Tektin family;
3212	OCTBI	3213(CALMI)	OCTBI,CALMI	KQ423958:312102..369035	56933	OCTBI_Ocbimv22000416m.p,OCTBI_Ocbimv22000419m.p,OCTBI_Ocbimv22000421m.p,OCTBI_Ocbimv22000422m.p
4280	CALMI	4281(EUPSC)	CALMI,EUPSC	oct001495F:16774..373868	357094	CALMI_Omin000958p,CALMI_Omin000959p,CALMI_Omin000960p
2768	CALMI	2769(OCTBI)	CALMI,OCTBI	oct003311F:74074..147190	73116	CALMI_Omin001628p,CALMI_Omin001630p,CALMI_Omin001627p
14418	OCTBI	14417(EUPSC)	OCTBI,EUPSC	KQ415804:153464..308905	155441	OCTBI_Ocbimv22004409m.p,OCTBI_Ocbimv22004411m.p,OCTBI_Ocbimv22004412m.p,OCTBI_Ocbimv22004413m.p,OCTBI_Ocbimv22004414m.p,OCTBI_Ocbimv22004417m.p
3770	CALMI	3771(OCTBI)	CALMI,OCTBI	oct008163F:3124..83669	80545	CALMI_Omin016025p,CALMI_Omin016023p,CALMI_Omin016024p
14412	EUPSC	14411(OCTBI)	OCTBI,EUPSC	Lachesis_group1__63_contigs__length_187967259:103524610..103918120	393510	EUPSC_cluster_28993,EUPSC_cluster_8867,EUPSC_cluster_12098	PF07716 Basic region leucine zipper; PF00481 Protein phosphatase 2C; PF08423 Rad51
3595	OCTBI	3594(CALMI)	OCTBI,CALMI	KQ418068:20701..95164	74463	OCTBI_Ocbimv22013838m.p,OCTBI_Ocbimv22013839m.p,OCTBI_Ocbimv22013840m.p,OCTBI_Ocbimv22013841m.p,OCTBI_Ocbimv22013842m.p,OCTBI_Ocbimv22013847m.p,OCTBI_Ocbimv22013849m.p
13912	EUPSC	13911(OCTBI)	OCTBI,EUPSC	Lachesis_group40__41_contigs__length_53238745:30949175..31088933	139758	EUPSC_cluster_18265,EUPSC_cluster_11830,EUPSC_cluster_13466	PF00097 Zinc finger, C3HC4 type (RING finger); PF02207 Putative zinc finger in N-recognin (UBR box); PF08238 Sel1 repeat-PF08238 Sel1 repeat-PF08238 Sel1 repeat-PF08238 Sel1 repeat-PF08238 Sel1 repeat-PF08238 Sel1 repeat-PF08238 Sel1 repeat-PF08238 Sel1 repeat-PF08238 Sel1 repeat-PF08238 Sel1 repeat
3861	CALMI	4468(EUPSC),3860(OCTBI)	EUPSC,OCTBI,CALMI	oct001122F:259344..490780	231436	CALMI_Omin008060p,CALMI_Omin008059p,CALMI_Omin008064p,CALMI_Omin008057p,CALMI_Omin008066p,CALMI_Omin008062p,CALMI_Omin008054p,CALMI_Omin008063p
13827	EUPSC	13828(OCTBI)	OCTBI,EUPSC	Lachesis_group25__42_contigs__length_94613958:88610559..88669948	59389	EUPSC_cluster_2792,EUPSC_cluster_27195,EUPSC_cluster_1415	PF14778 Olfactory receptor 4-like; ; PF00004 ATPase family associated with various cellular activities (AAA)-PF09336 Vps4 C terminal oligomerisation domain
14378	EUPSC	14379(OCTBI)	EUPSC,OCTBI	Lachesis_group4__56_contigs__length_174030884:61025105..61746149	721044	EUPSC_cluster_773,EUPSC_cluster_5861,EUPSC_cluster_14493,EUPSC_cluster_22847,EUPSC_cluster_1064,EUPSC_cluster_9293	PF00013 KH domain-PF00013 KH domain-PF00013 KH domain; PF09737 De-etiolated protein 1 Det1; PF00069 Protein kinase domain; PF00237 Ribosomal protein L22p/L17e; PF01920 Prefoldin subunit; PF02146 Sir2 family-PF02146 Sir2 family
14053	OCTBI	14054(EUPSC)	EUPSC,OCTBI	KQ418755:63310..136283	72973	OCTBI_Ocbimv22019356m.p,OCTBI_Ocbimv22019359m.p,OCTBI_Ocbimv22019360m.p
4270	EUPSC	3419(CALMI),3420(OCTBI)	CALMI,OCTBI,EUPSC	Lachesis_group25__42_contigs__length_94613958:59335745..59528850	193105	EUPSC_cluster_7157,EUPSC_cluster_10737,EUPSC_cluster_5255	PF00579 tRNA synthetases class I (W and Y)-PF01588 Putative tRNA binding domain; PF03464 eRF1 domain 2-PF03465 eRF1 domain 3-PF03463 eRF1 domain 1;
3116	OCTBI	3115(CALMI)	CALMI,OCTBI	KQ417807:171804..198056	26252	OCTBI_Ocbimv22011592m.p,OCTBI_Ocbimv22011593m.p,OCTBI_Ocbimv22011594m.p
4361	EUPSC	3339(CALMI)	EUPSC,CALMI	Lachesis_group0__68_contigs__length_203855924:59866698..60149383	282685	EUPSC_cluster_21620,EUPSC_cluster_21633,EUPSC_cluster_21651,EUPSC_cluster_720,EUPSC_cluster_11548	PF00370 FGGY family of carbohydrate kinases, N-terminal domain-PF00370 FGGY family of carbohydrate kinases, N-terminal domain; PF13087 AAA domain-PF13087 AAA domain-PF13086 AAA domain-PF13086 AAA domain; PF08696 DNA replication factor Dna2; PF13445 RING-type zinc-finger; PF01436 NHL repeat-PF13445 RING-type zinc-finger
14115	OCTBI	14114(EUPSC)	EUPSC,OCTBI	KQ416865:7915..126053	118138	OCTBI_Ocbimv22000518m.p,OCTBI_Ocbimv22000521m.p,OCTBI_Ocbimv22000523m.p,OCTBI_Ocbimv22000525m.p
14391	EUPSC	14390(OCTBI)	OCTBI,EUPSC	Lachesis_group5__70_contigs__length_158228327:119386841..119639474	252633	EUPSC_cluster_6709,EUPSC_cluster_29172,EUPSC_cluster_12261	PF00443 Ubiquitin carboxyl-terminal hydrolase; PF12430 Abscisic acid G-protein coupled receptor; PF01061 ABC-2 type transporter-PF00005 ABC transporter
2814	OCTBI	2813(CALMI)	CALMI,OCTBI	KQ421873:89991..250851	160860	OCTBI_Ocbimv22033796m.p,OCTBI_Ocbimv22033798m.p,OCTBI_Ocbimv22033803m.p
2695	CALMI	2696(OCTBI)	OCTBI,CALMI	oct007099F:206..128907	128701	CALMI_Omin011385p,CALMI_Omin011387p,CALMI_Omin011384p,CALMI_Omin011386p
14056	EUPSC	14055(OCTBI)	EUPSC,OCTBI	Lachesis_group13__58_contigs__length_132030582:6807418..7092775	285357	EUPSC_cluster_3061,EUPSC_cluster_24954,EUPSC_cluster_4317,EUPSC_cluster_4318	PF00271 Helicase conserved C-terminal domain-PF13234 rRNA-processing arch domain-PF00270 DEAD/DEAH box helicase-PF08148 DSHCT (NUC185) domain; PF03148 Tektin family; PF05090 Vitamin K-dependent gamma-carboxylase; PF05090 Vitamin K-dependent gamma-carboxylase-PF05090 Vitamin K-dependent gamma-carboxylase
4504	EUPSC	3871(CALMI)	EUPSC,OCTBI,CALMI	Lachesis_group9__67_contigs__length_144638433:48958096..49113357	155261	EUPSC_cluster_11528,EUPSC_cluster_9422,EUPSC_cluster_9749	PF00018 SH3 domain-PF00018 SH3 domain-PF00017 SH2 domain; PF01027 Inhibitor of apoptosis-promoting Bax1; PF03372 Endonuclease/Exonuclease/phosphatase family
14537	OCTBI	14536(EUPSC)	OCTBI,EUPSC	KQ417395:197680..364116	166436	OCTBI_Ocbimv22007261m.p,OCTBI_Ocbimv22007262m.p,OCTBI_Ocbimv22007264m.p
3281	OCTBI	3280(CALMI)	OCTBI,CALMI	KQ425915:924..54320	53396	OCTBI_Ocbimv22006421m.p,OCTBI_Ocbimv22006422m.p,OCTBI_Ocbimv22006423m.p
14187	EUPSC	14188(OCTBI)	OCTBI,EUPSC	Lachesis_group0__68_contigs__length_203855924:1176..95208	94032	EUPSC_cluster_5331,EUPSC_cluster_13912,EUPSC_cluster_2589	PF01105 emp24/gp25L/p24 family/GOLD; PF00149 Calcineurin-like phosphoesterase-PF08321 PPP5 TPR repeat region-PF00515 Tetratricopeptide repeat-PF13181 Tetratricopeptide repeat; PF13656 RNA polymerase Rpb3/Rpb11 dimerisation domain
2481	CALMI	3930(OCTBI),2482(OCTBI)	OCTBI,CALMI	oct006041F:93250..160233	66983	CALMI_Omin012950p,CALMI_Omin012947p,CALMI_Omin012948p
4465	EUPSC	3910(OCTBI),3909(CALMI)	EUPSC,OCTBI,CALMI	Lachesis_group0__68_contigs__length_203855924:123911535..124325871	414336	EUPSC_cluster_649,EUPSC_cluster_704,EUPSC_cluster_4937,EUPSC_cluster_27574	PF00153 Mitochondrial carrier protein-PF00153 Mitochondrial carrier protein-PF00153 Mitochondrial carrier protein; ; PF02167 Cytochrome C1 family; PF01834 XRCC1 N terminal domain
14359	EUPSC	14360(OCTBI)	EUPSC,OCTBI	Lachesis_group35__42_contigs__length_70637049:29310983..29919895	608912	EUPSC_cluster_2258,EUPSC_cluster_26999,EUPSC_cluster_1689,EUPSC_cluster_11974,EUPSC_cluster_1030,EUPSC_cluster_216	PF13516 Leucine Rich repeat-PF13516 Leucine Rich repeat-PF13516 Leucine Rich repeat-PF13516 Leucine Rich repeat-PF13516 Leucine Rich repeat; PF10044 Retinal tissue protein; PF00644 Poly(ADP-ribose) polymerase catalytic domain-PF00645 Poly(ADP-ribose) polymerase and DNA-Ligase Zn-finger region-PF00645 Poly(ADP-ribose) polymerase and DNA-Ligase Zn-finger region-PF00533 BRCA1 C Terminus (BRCT) domai…
14034	EUPSC	11951(OCTBI)	EUPSC,OCTBI	Lachesis_group35__42_contigs__length_70637049:56454450..56989916	535466	EUPSC_cluster_4102,EUPSC_cluster_4953,EUPSC_cluster_1734,EUPSC_cluster_8533	PF02487 CLN3 protein-PF02487 CLN3 protein; PF02146 Sir2 family; PF14670 Coagulation Factor Xa inhibitory site-PF14670 Coagulation Factor Xa inhibitory site-PF14670 Coagulation Factor Xa inhibitory site-PF00058 Low-density lipoprotein receptor repeat class B-PF00058 Low-density lipoprotein receptor repeat class B-PF00058 Low-density lipoprotein receptor repeat class B-PF00058 Low-density lipoprote…
14139	OCTBI	4399(EUPSC)	EUPSC,OCTBI,CALMI	KQ418740:13943..778658	764715	OCTBI_Ocbimv22019275m.p,OCTBI_Ocbimv22019280m.p,OCTBI_Ocbimv22019282m.p
13864	OCTBI	13863(EUPSC)	OCTBI,EUPSC	KQ419577:509748..570227	60479	OCTBI_Ocbimv22024429m.p,OCTBI_Ocbimv22024431m.p,OCTBI_Ocbimv22024432m.p
4439	EUPSC	3449(OCTBI),3448(CALMI)	EUPSC,OCTBI,CALMI	Lachesis_group21__43_contigs__length_103963499:58660823..58930139	269316	EUPSC_cluster_14923,EUPSC_cluster_938,EUPSC_cluster_25172,EUPSC_cluster_8156,EUPSC_cluster_25173	PF00498 FHA domain-PF16508 Second BRCT domain on Nijmegen syndrome breakage protein-PF00533 BRCA1 C Terminus (BRCT) domain-PF08599 DNA damage repair protein Nbs1; PF10357 Domain of Kin17 curved DNA-binding protein; ; PF14929 TAF RNA Polymerase I subunit A; PF14929 TAF RNA Polymerase I subunit A
3143	OCTBI	4351(EUPSC),3144(CALMI)	OCTBI,CALMI,EUPSC	KQ417497:1824376..2046846	222470	OCTBI_Ocbimv22008344m.p,OCTBI_Ocbimv22008346m.p,OCTBI_Ocbimv22008348m.p,OCTBI_Ocbimv22008350m.p
14589	OCTBI	14590(EUPSC)	OCTBI,EUPSC	KQ417621:172349..252578	80229	OCTBI_Ocbimv22009873m.p,OCTBI_Ocbimv22009874m.p,OCTBI_Ocbimv22009875m.p
3537	CALMI	4339(EUPSC)	CALMI,OCTBI,EUPSC	oct009625F:1521..104950	103429	CALMI_Omin012027p,CALMI_Omin012025p,CALMI_Omin012026p,CALMI_Omin012024p
2765	OCTBI	4450(EUPSC),2764(CALMI)	EUPSC,OCTBI,CALMI	KQ418552:226378..314309	87931	OCTBI_Ocbimv22017852m.p,OCTBI_Ocbimv22017853m.p,OCTBI_Ocbimv22017854m.p,OCTBI_Ocbimv22017856m.p,OCTBI_Ocbimv22017860m.p
3343	OCTBI	3344(CALMI)	OCTBI,CALMI	KQ433121:1584..62728	61144	OCTBI_Ocbimv22022898m.p,OCTBI_Ocbimv22022899m.p,OCTBI_Ocbimv22022901m.p
3598	OCTBI	3597(CALMI)	OCTBI,CALMI	KQ416662:3064..59616	56552	OCTBI_Ocbimv22036851m.p,OCTBI_Ocbimv22036853m.p,OCTBI_Ocbimv22036855m.p
2471	OCTBI	2472(CALMI)	CALMI,OCTBI	KQ425437:32066..149808	117742	OCTBI_Ocbimv22004782m.p,OCTBI_Ocbimv22004783m.p,OCTBI_Ocbimv22004787m.p
2506	CALMI	4369(EUPSC)	OCTBI,CALMI,EUPSC	oct001708F:25979..338310	312331	CALMI_Omin003773p,CALMI_Omin003771p,CALMI_Omin003774p,CALMI_Omin003776p,CALMI_Omin003775p
14591	EUPSC	14592(OCTBI)	EUPSC,OCTBI	Lachesis_group6__62_contigs__length_156955521:146766033..146930094	164061	EUPSC_cluster_15914,EUPSC_cluster_26655,EUPSC_cluster_7234	PF00397 WW domain-PF02179 BAG domain; PF05291 Bystin; PF00806 Pumilio-family RNA binding repeat-PF00806 Pumilio-family RNA binding repeat-PF00806 Pumilio-family RNA binding repeat-PF00806 Pumilio-family RNA binding repeat-PF00806 Pumilio-family RNA binding repeat-PF00806 Pumilio-family RNA binding repeat-PF00806 Pumilio-family RNA binding repeat
13923	EUPSC	13922(OCTBI)	OCTBI,EUPSC	Lachesis_group26__46_contigs__length_93059273:37823929..37935579	111650	EUPSC_cluster_4219,EUPSC_cluster_3153,EUPSC_cluster_9085,EUPSC_cluster_25635	PF00270 DEAD/DEAH box helicase-PF00271 Helicase conserved C-terminal domain; PF01042 Endoribonuclease L-PSP-PF01042 Endoribonuclease L-PSP-PF01902 Diphthamide synthase; PF15309 ALMS motif;
3360	OCTBI	3361(CALMI)	OCTBI,CALMI	KQ425163:14171..119330	105159	OCTBI_Ocbimv22003975m.p,OCTBI_Ocbimv22003976m.p,OCTBI_Ocbimv22003977m.p,OCTBI_Ocbimv22003978m.p
2657	CALMI	2656(OCTBI)	OCTBI,CALMI	oct014464F:4084..74394	70310	CALMI_Omin027413p,CALMI_Omin027415p,CALMI_Omin027414p
14423	OCTBI	14422(EUPSC)	OCTBI,EUPSC	KQ416531:1126..142127	141001	OCTBI_Ocbimv22034424m.p,OCTBI_Ocbimv22034425m.p,OCTBI_Ocbimv22034426m.p
13800	EUPSC	13799(OCTBI)	EUPSC,OCTBI	Lachesis_group18__53_contigs__length_106174747:89112082..89708690	596608	EUPSC_cluster_6547,EUPSC_cluster_3182,EUPSC_cluster_10504,EUPSC_cluster_6237,EUPSC_cluster_21383	PF15985 KH domain-PF14382 Exosome complex exonuclease RRP4 N-terminal region; PF00675 Insulinase (Peptidase family M16)-PF05193 Peptidase M16 inactive domain; PF07989 Centrosomin N-terminal motif 1; PF00432 Prenyltransferase and squalene oxidase repeat-PF00432 Prenyltransferase and squalene oxidase repeat-PF00432 Prenyltransferase and squalene oxidase repeat-PF00432 Prenyltransferase and squalene…
14572	EUPSC	2984(OCTBI)	OCTBI,CALMI,EUPSC	Lachesis_group21__43_contigs__length_103963499:89006614..89181191	174577	EUPSC_cluster_21368,EUPSC_cluster_5571,EUPSC_cluster_2560	PF01170 Putative RNA methylase family UPF0020; PF01008 Initiation factor 2 subunit family; PF10300 Protein of unknown function (DUF3808)
2576	OCTBI	4264(EUPSC),3814(CALMI),2575(CALMI)	EUPSC,OCTBI,CALMI	KQ431332:14784..307273	292489	OCTBI_Ocbimv22019815m.p,OCTBI_Ocbimv22019816m.p,OCTBI_Ocbimv22019818m.p,OCTBI_Ocbimv22019820m.p,OCTBI_Ocbimv22019821m.p,OCTBI_Ocbimv22019825m.p,OCTBI_Ocbimv22019828m.p
3744	OCTBI	3743(CALMI)	OCTBI,CALMI	KQ417581:1607..171725	170118	OCTBI_Ocbimv22009295m.p,OCTBI_Ocbimv22009296m.p,OCTBI_Ocbimv22009297m.p,OCTBI_Ocbimv22009298m.p,OCTBI_Ocbimv22009299m.p,OCTBI_Ocbimv22009302m.p,OCTBI_Ocbimv22009303m.p,OCTBI_Ocbimv22009304m.p
3201	OCTBI	3202(CALMI)	CALMI,OCTBI	KQ425603:41711..84580	42869	OCTBI_Ocbimv22005428m.p,OCTBI_Ocbimv22005429m.p,OCTBI_Ocbimv22005430m.p
3438	CALMI	3439(OCTBI)	CALMI,OCTBI,EUPSC	oct004305F:11943..97357	85414	CALMI_Omin009418p,CALMI_Omin009423p,CALMI_Omin009420p,CALMI_Omin009422p,CALMI_Omin009419p
2894	OCTBI	4394(EUPSC),2893(CALMI)	OCTBI,CALMI,EUPSC	KQ417182:475148..798615	323467	OCTBI_Ocbimv22004595m.p,OCTBI_Ocbimv22004597m.p,OCTBI_Ocbimv22004598m.p,OCTBI_Ocbimv22004602m.p
13813	OCTBI	13814(EUPSC)	OCTBI,EUPSC	KQ419232:197323..421348	224025	OCTBI_Ocbimv22022491m.p,OCTBI_Ocbimv22022493m.p,OCTBI_Ocbimv22022496m.p
3196	OCTBI	4445(EUPSC),3195(CALMI)	EUPSC,OCTBI,CALMI	KQ416719:349654..739621	389967	OCTBI_Ocbimv22038008m.p,OCTBI_Ocbimv22038009m.p,OCTBI_Ocbimv22038014m.p,OCTBI_Ocbimv22038017m.p,OCTBI_Ocbimv22038019m.p
3533	OCTBI	14343(EUPSC),3534(CALMI)	EUPSC,CALMI,OCTBI	KQ421116:46259..287849	241590	OCTBI_Ocbimv22030883m.p,OCTBI_Ocbimv22030884m.p,OCTBI_Ocbimv22030885m.p,OCTBI_Ocbimv22030878m.p,OCTBI_Ocbimv22030880m.p
2879	OCTBI	2878(CALMI)	OCTBI,CALMI	KQ418971:3744..53150	49406	OCTBI_Ocbimv22020857m.p,OCTBI_Ocbimv22020859m.p,OCTBI_Ocbimv22020861m.p
3515	CALMI	3514(OCTBI)	CALMI,OCTBI	oct019895F:13527..56388	42861	CALMI_Omin017519p,CALMI_Omin017521p,CALMI_Omin017520p
14074	EUPSC	14073(OCTBI)	EUPSC,OCTBI	Lachesis_group17__52_contigs__length_118315660:115796836..116038406	241570	EUPSC_cluster_15527,EUPSC_cluster_3237,EUPSC_cluster_22901,EUPSC_cluster_3505	PF00144 Beta-lactamase; PF00144 Beta-lactamase; PF00144 Beta-lactamase; PF00169 PH domain-PF00169 PH domain
3455	CALMI	3454(OCTBI)	OCTBI,CALMI	oct004365F:128451..166356	37905	CALMI_Omin005060p,CALMI_Omin005062p,CALMI_Omin005061p
2954	OCTBI	2955(CALMI),4501(EUPSC)	EUPSC,OCTBI,CALMI	KQ420415:197718..583182	385464	OCTBI_Ocbimv22027989m.p,OCTBI_Ocbimv22027990m.p,OCTBI_Ocbimv22027995m.p,OCTBI_Ocbimv22027996m.p,OCTBI_Ocbimv22027998m.p,OCTBI_Ocbimv22027999m.p,OCTBI_Ocbimv22028000m.p,OCTBI_Ocbimv22028001m.p
14025	EUPSC	14024(OCTBI)	EUPSC,OCTBI	Lachesis_group19__43_contigs__length_108131866:51823212..52430130	606918	EUPSC_cluster_14912,EUPSC_cluster_7291,EUPSC_cluster_1501	PF01167 Tub family; PF01167 Tub family; PF00266 Aminotransferase class-V
14188	OCTBI	14187(EUPSC)	OCTBI,EUPSC	KQ419940:17816..54718	36902	OCTBI_Ocbimv22025975m.p,OCTBI_Ocbimv22025977m.p,OCTBI_Ocbimv22025978m.p
3030	CALMI	3029(OCTBI)	EUPSC,OCTBI,CALMI	oct013033F:86..102173	102087	CALMI_Omin025099p,CALMI_Omin025100p,CALMI_Omin025098p
3850	OCTBI	3851(CALMI)	CALMI,OCTBI	KQ424265:8709..57575	48866	OCTBI_Ocbimv22001316m.p,OCTBI_Ocbimv22001317m.p,OCTBI_Ocbimv22001318m.p
2586	OCTBI	14377(EUPSC),2585(CALMI)	OCTBI,CALMI,EUPSC	KQ418702:358345..728210	369865	OCTBI_Ocbimv22018955m.p,OCTBI_Ocbimv22018957m.p,OCTBI_Ocbimv22018960m.p,OCTBI_Ocbimv22018964m.p
3292	OCTBI	3293(CALMI),4218(EUPSC)	EUPSC,OCTBI,CALMI	KQ420132:757934..1092439	334505	OCTBI_Ocbimv22026870m.p,OCTBI_Ocbimv22026871m.p,OCTBI_Ocbimv22026872m.p,OCTBI_Ocbimv22026873m.p,OCTBI_Ocbimv22026876m.p,OCTBI_Ocbimv22026878m.p,OCTBI_Ocbimv22026881m.p
14532	EUPSC	14531(OCTBI)	EUPSC,OCTBI	Lachesis_group4__56_contigs__length_174030884:82175839..82417816	241977	EUPSC_cluster_6650,EUPSC_cluster_16785,EUPSC_cluster_6738	PF00017 SH2 domain; PF14223 gag-polypeptide of LTR copia-type-PF10914 Protein of unknown function (DUF2781);
3497	CALMI	3498(OCTBI)	OCTBI,CALMI	oct006558F:10393..150914	140521	CALMI_Omin013521p,CALMI_Omin013523p,CALMI_Omin013522p
3396	CALMI	3397(OCTBI)	OCTBI,CALMI	oct000024F:337064..406645	69581	CALMI_Omin007612p,CALMI_Omin007617p,CALMI_Omin007611p
3446	CALMI	3368(OCTBI)	CALMI,OCTBI	oct016297F:15307..88336	73029	CALMI_Omin017097p,CALMI_Omin017096p,CALMI_Omin017095p
2889	OCTBI	2890(CALMI)	OCTBI,CALMI	KQ422629:360895..611523	250628	OCTBI_Ocbimv22035994m.p,OCTBI_Ocbimv22035997m.p,OCTBI_Ocbimv22035998m.p,OCTBI_Ocbimv22036000m.p
13985	OCTBI	13986(EUPSC)	OCTBI,EUPSC	KQ421265:126767..221424	94657	OCTBI_Ocbimv22031521m.p,OCTBI_Ocbimv22031522m.p,OCTBI_Ocbimv22031527m.p
2653	CALMI	2654(OCTBI)	CALMI,OCTBI	oct010447F:3805..77009	73204	CALMI_Omin027172p,CALMI_Omin027171p,CALMI_Omin027170p
3331	OCTBI	3332(CALMI)	CALMI,OCTBI	KQ418908:378553..536848	158295	OCTBI_Ocbimv22020406m.p,OCTBI_Ocbimv22020409m.p,OCTBI_Ocbimv22020410m.p,OCTBI_Ocbimv22020411m.p,OCTBI_Ocbimv22020412m.p
14485	EUPSC	14486(OCTBI)	OCTBI,EUPSC	Lachesis_group41__39_contigs__length_54644242:37383353..37813387	430034	EUPSC_cluster_19060,EUPSC_cluster_29155,EUPSC_cluster_2060,EUPSC_cluster_13080,EUPSC_cluster_7376,EUPSC_cluster_19059,EUPSC_cluster_19062	; PF01922 SRP19 protein; PF07528 DZF domain; PF09739 Mini-chromosome maintenance replisome factor; PF02862 DDHD domain; PF00078 Reverse transcriptase (RNA-dependent DNA polymerase)-PF01363 FYVE zinc finger;
13822	OCTBI	13821(EUPSC)	EUPSC,OCTBI	KQ419621:632513..1335510	702997	OCTBI_Ocbimv22024718m.p,OCTBI_Ocbimv22024722m.p,OCTBI_Ocbimv22024724m.p,OCTBI_Ocbimv22024728m.p
14377	EUPSC	2586(OCTBI)	EUPSC,OCTBI,CALMI	Lachesis_group12__46_contigs__length_133395132:39633575..40226357	592782	EUPSC_cluster_2177,EUPSC_cluster_1034,EUPSC_cluster_180	PF00153 Mitochondrial carrier protein-PF00153 Mitochondrial carrier protein-PF00153 Mitochondrial carrier protein; PF11470 TUG ubiquitin-like domain-PF00789 UBX domain; PF00261 Tropomyosin
13828	OCTBI	13827(EUPSC)	OCTBI,EUPSC	KQ423808:146723..225426	78703	OCTBI_Ocbimv22039947m.p,OCTBI_Ocbimv22039949m.p,OCTBI_Ocbimv22039951m.p
3435	OCTBI	3434(CALMI)	CALMI,OCTBI	KQ417802:2014..357849	355835	OCTBI_Ocbimv22011550m.p,OCTBI_Ocbimv22011555m.p,OCTBI_Ocbimv22011557m.p
2934	OCTBI	2933(CALMI)	CALMI,OCTBI	KQ421549:512352..626196	113844	OCTBI_Ocbimv22032472m.p,OCTBI_Ocbimv22032473m.p,OCTBI_Ocbimv22032476m.p
3124	CALMI	4481(EUPSC),2790(OCTBI)	CALMI,OCTBI,EUPSC	oct003028F:3776..300035	296259	CALMI_Omin004464p,CALMI_Omin004466p,CALMI_Omin004467p,CALMI_Omin004465p
13917	OCTBI	13916(EUPSC)	EUPSC,OCTBI	KQ427828:883..37389	36506	OCTBI_Ocbimv22011635m.p,OCTBI_Ocbimv22011636m.p,OCTBI_Ocbimv22011639m.p
3686	OCTBI	3687(CALMI)	OCTBI,CALMI	KQ417377:922526..948256	25730	OCTBI_Ocbimv22007093m.p,OCTBI_Ocbimv22007094m.p,OCTBI_Ocbimv22007095m.p
4422	CALMI	4421(EUPSC)	EUPSC,CALMI	oct003597F:14831..290929	276098	CALMI_Omin000908p,CALMI_Omin000909p,CALMI_Omin000907p
14417	EUPSC	14418(OCTBI)	OCTBI,EUPSC	Lachesis_group9__67_contigs__length_144638433:87958181..88425418	467237	EUPSC_cluster_9125,EUPSC_cluster_23151,EUPSC_cluster_744,EUPSC_cluster_7335,EUPSC_cluster_23153,EUPSC_cluster_4739	PF03770 Inositol polyphosphate kinase; PF01896 DNA primase small subunit; PF13513 HEAT-like repeat-PF03810 Importin-beta N-terminal domain; PF02373 JmjC domain, hydroxylase; PF05881 2',3'-cyclic nucleotide 3'-phosphodiesterase (CNP or CNPase)-PF13671 AAA domain; PF00487 Fatty acid desaturase-PF00173 Cytochrome b5-like Heme/Steroid binding domain
2826	OCTBI	4456(EUPSC),2825(CALMI)	OCTBI,CALMI,EUPSC	KQ424337:50971..116660	65689	OCTBI_Ocbimv22001502m.p,OCTBI_Ocbimv22001504m.p,OCTBI_Ocbimv22001506m.p,OCTBI_Ocbimv22001508m.p,OCTBI_Ocbimv22001501m.p
4227	EUPSC	2032(CALMI)	EUPSC,CALMI,OCTBI	Lachesis_group0__68_contigs__length_203855924:119669115..119972500	303385	EUPSC_cluster_6708,EUPSC_cluster_9788,EUPSC_cluster_22834,EUPSC_cluster_8018,EUPSC_cluster_8019	PF11461 Rab interacting lysosomal protein-PF09744 JNK_SAPK-associated protein-1; PF00514 Armadillo/beta-catenin-like repeat-PF00514 Armadillo/beta-catenin-like repeat-PF16186 Atypical Arm repeat; PF03962 Mnd1 family; PF03879 Cgr1 family; PF03879 Cgr1 family
4130	EUPSC	3381(CALMI),3380(OCTBI)	OCTBI,CALMI,EUPSC	Lachesis_group7__52_contigs__length_145002158:84001677..84090107	88430	EUPSC_cluster_4124,EUPSC_cluster_14765,EUPSC_cluster_8080	PF04588 Hypoxia induced protein conserved region; PF00270 DEAD/DEAH box helicase-PF00271 Helicase conserved C-terminal domain; PF10607 CTLH/CRA C-terminal to LisH motif domain
3151	OCTBI	3150(CALMI),3510(CALMI)	OCTBI,CALMI	KQ426474:1132..66202	65070	OCTBI_Ocbimv22007875m.p,OCTBI_Ocbimv22007876m.p,OCTBI_Ocbimv22007877m.p,OCTBI_Ocbimv22007878m.p
3469	CALMI	3468(OCTBI)	CALMI,OCTBI	oct001885F:137160..368228	231068	CALMI_Omin007024p,CALMI_Omin007027p,CALMI_Omin007025p,CALMI_Omin007026p
3518	CALMI	3519(OCTBI)	OCTBI,CALMI	oct003450F:229984..264488	34504	CALMI_Omin008116p,CALMI_Omin008114p,CALMI_Omin008113p,CALMI_Omin008115p
14565	OCTBI	14564(EUPSC)	EUPSC,OCTBI	KQ418949:79119..505787	426668	OCTBI_Ocbimv22020670m.p,OCTBI_Ocbimv22020675m.p,OCTBI_Ocbimv22020676m.p,OCTBI_Ocbimv22020678m.p,OCTBI_Ocbimv22020679m.p
3553	OCTBI	4265(EUPSC),3552(CALMI)	EUPSC,OCTBI,CALMI	KQ418444:75..421845	421770	OCTBI_Ocbimv22017047m.p,OCTBI_Ocbimv22017048m.p,OCTBI_Ocbimv22017049m.p,OCTBI_Ocbimv22017041m.p,OCTBI_Ocbimv22017043m.p
2529	OCTBI	2528(CALMI)	CALMI,OCTBI	KQ422187:502983..612452	109469	OCTBI_Ocbimv22034826m.p,OCTBI_Ocbimv22034827m.p,OCTBI_Ocbimv22034828m.p
3458	OCTBI	3459(CALMI),14254(EUPSC)	EUPSC,OCTBI,CALMI	KQ425015:393449..680589	287140	OCTBI_Ocbimv22003466m.p,OCTBI_Ocbimv22003467m.p,OCTBI_Ocbimv22003468m.p,OCTBI_Ocbimv22003470m.p,OCTBI_Ocbimv22003472m.p,OCTBI_Ocbimv22003476m.p
2722	CALMI	4405(EUPSC),2721(OCTBI)	EUPSC,CALMI,OCTBI	oct004782F:15332..119434	104102	CALMI_Omin009247p,CALMI_Omin009252p,CALMI_Omin009248p,CALMI_Omin009249p,CALMI_Omin009250p
3676	OCTBI	3677(CALMI)	CALMI,OCTBI	KQ416930:336799..358616	21817	OCTBI_Ocbimv22001395m.p,OCTBI_Ocbimv22001396m.p,OCTBI_Ocbimv22001397m.p
14152	EUPSC	14153(OCTBI)	EUPSC,OCTBI	Lachesis_group27__44_contigs__length_93323795:7950718..8174227	223509	EUPSC_cluster_2605,EUPSC_cluster_1565,EUPSC_cluster_5232	PF12349 Sterol-sensing domain of SREBP cleavage-activation-PF00368 Hydroxymethylglutaryl-coenzyme A reductase; PF00069 Protein kinase domain-PF00659 POLO box duplicated region; PF00294 pfkB family carbohydrate kinase
3351	CALMI	4155(EUPSC),3350(OCTBI)	EUPSC,CALMI,OCTBI	oct004309F:39158..233718	194560	CALMI_Omin001505p,CALMI_Omin001508p,CALMI_Omin001506p,CALMI_Omin001510p,CALMI_Omin001507p,CALMI_Omin001509p
4330	EUPSC	3600(CALMI)	CALMI,OCTBI,EUPSC	Lachesis_group0__68_contigs__length_203855924:97568443..98560450	992007	EUPSC_cluster_9466,EUPSC_cluster_25129,EUPSC_cluster_25130	PF05826 Phospholipase A2; PF05362 Lon protease (S16) C-terminal proteolytic domain; PF00004 ATPase family associated with various cellular activities (AAA)-PF02190 ATP-dependent protease La (LON) substrate-binding domain
3324	OCTBI	3323(CALMI),13898(EUPSC)	OCTBI,CALMI,EUPSC	KQ421523:1357115..1654489	297374	OCTBI_Ocbimv22032351m.p,OCTBI_Ocbimv22032352m.p,OCTBI_Ocbimv22032355m.p,OCTBI_Ocbimv22032357m.p,OCTBI_Ocbimv22032358m.p,OCTBI_Ocbimv22032360m.p,OCTBI_Ocbimv22032361m.p
3050	CALMI	3011(OCTBI)	CALMI,OCTBI	oct021747F:11876..56434	44558	CALMI_Omin016677p,CALMI_Omin016674p,CALMI_Omin016675p,CALMI_Omin016676p
3830	CALMI	3273(OCTBI)	OCTBI,CALMI	oct014388F:30094..83187	53093	CALMI_Omin028202p,CALMI_Omin028203p,CALMI_Omin028204p
13955	EUPSC	13956(OCTBI)	OCTBI,EUPSC	Lachesis_group8__53_contigs__length_148332072:38280916..38427184	146268	EUPSC_cluster_22116,EUPSC_cluster_22117,EUPSC_cluster_22118	; PF14719 Phosphotyrosine interaction domain (PTB/PID); PF12796 Ankyrin repeats (3 copies)-PF12796 Ankyrin repeats (3 copies)-PF07525 SOCS box
14455	EUPSC	14198(OCTBI)	OCTBI,EUPSC	Lachesis_group18__53_contigs__length_106174747:101051745..101835408	783663	EUPSC_cluster_2422,EUPSC_cluster_1293,EUPSC_cluster_9382,EUPSC_cluster_26225,EUPSC_cluster_26221	PF13716 Divergent CRAL/TRIO domain-PF01661 Macro domain; PF02807 ATP:guanido phosphotransferase, N-terminal domain-PF00217 ATP:guanido phosphotransferase, C-terminal catalytic domain; PF05485 THAP domain-PF00651 BTB/POZ domain; PF05485 THAP domain; PF00651 BTB/POZ domain
14006	EUPSC	14007(OCTBI)	OCTBI,EUPSC	Lachesis_group29__46_contigs__length_89259793:52950068..53392828	442760	EUPSC_cluster_857,EUPSC_cluster_8253,EUPSC_cluster_2609	PF00109 Beta-ketoacyl synthase, N-terminal domain-PF00698 Acyl transferase domain-PF00107 Zinc-binding dehydrogenase-PF08659 KR domain-PF14765 Polyketide synthase dehydratase-PF00975 Thioesterase domain-PF16197 Ketoacyl-synthetase C-terminal extension-PF02801 Beta-ketoacyl synthase, C-terminal domain-PF00550 Phosphopantetheine attachment site; PF01490 Transmembrane amino acid transporter protein-…
14276	OCTBI	14277(EUPSC)	OCTBI,EUPSC	KQ416627:220338..275692	55354	OCTBI_Ocbimv22036244m.p,OCTBI_Ocbimv22036245m.p,OCTBI_Ocbimv22036246m.p
3918	CALMI	3917(OCTBI),4312(EUPSC)	CALMI,OCTBI,EUPSC	oct000728F:82224..345137	262913	CALMI_Omin010160p,CALMI_Omin010166p,CALMI_Omin010158p,CALMI_Omin010159p,CALMI_Omin010165p
3139	OCTBI	3140(CALMI)	CALMI,OCTBI	KQ421217:308362..402017	93655	OCTBI_Ocbimv22031290m.p,OCTBI_Ocbimv22031291m.p,OCTBI_Ocbimv22031299m.p
14309	EUPSC	14308(OCTBI)	OCTBI,EUPSC	Lachesis_group20__56_contigs__length_105542877:100564327..100667968	103641	EUPSC_cluster_27522,EUPSC_cluster_14126,EUPSC_cluster_7574	PF00096 Zinc finger, C2H2 type-PF00096 Zinc finger, C2H2 type; PF00096 Zinc finger, C2H2 type-PF00096 Zinc finger, C2H2 type-PF00096 Zinc finger, C2H2 type-PF00096 Zinc finger, C2H2 type-PF00096 Zinc finger, C2H2 type; PF00096 Zinc finger, C2H2 type-PF00096 Zinc finger, C2H2 type-PF00096 Zinc finger, C2H2 type-PF00096 Zinc finger, C2H2 type-PF00096 Zinc finger, C2H2 type-PF00096 Zinc finger, C2H2…
3209	CALMI	3208(OCTBI)	OCTBI,CALMI	oct000021F:551550..1203669	652119	CALMI_Omin006930p,CALMI_Omin006932p,CALMI_Omin006931p
2929	CALMI	2930(OCTBI)	CALMI,OCTBI	oct002675F:61423..309612	248189	CALMI_Omin003135p,CALMI_Omin003136p,CALMI_Omin003137p
3788	OCTBI	3787(CALMI)	EUPSC,CALMI,OCTBI	KQ420902:30324..148407	118083	OCTBI_Ocbimv22030122m.p,OCTBI_Ocbimv22030125m.p,OCTBI_Ocbimv22030127m.p
3165	OCTBI	14352(EUPSC),3164(CALMI)	OCTBI,CALMI,EUPSC	KQ420240:20711..257994	237283	OCTBI_Ocbimv22027263m.p,OCTBI_Ocbimv22027264m.p,OCTBI_Ocbimv22027265m.p,OCTBI_Ocbimv22027266m.p,OCTBI_Ocbimv22027260m.p,OCTBI_Ocbimv22027261m.p
2743	OCTBI	2744(CALMI)	OCTBI,CALMI	KQ422938:8377..108314	99937	OCTBI_Ocbimv22037132m.p,OCTBI_Ocbimv22037135m.p,OCTBI_Ocbimv22037137m.p,OCTBI_Ocbimv22037138m.p
14120	OCTBI	14119(EUPSC)	OCTBI,EUPSC	KQ427746:108322..350883	242561	OCTBI_Ocbimv22011429m.p,OCTBI_Ocbimv22011431m.p,OCTBI_Ocbimv22011436m.p,OCTBI_Ocbimv22011437m.p
2760	OCTBI	2761(CALMI)	OCTBI,CALMI	KQ424229:296882..351800	54918	OCTBI_Ocbimv22001216m.p,OCTBI_Ocbimv22001218m.p,OCTBI_Ocbimv22001219m.p
3893	OCTBI	3894(CALMI)	CALMI,OCTBI	KQ417910:10712..82018	71306	OCTBI_Ocbimv22012388m.p,OCTBI_Ocbimv22012389m.p,OCTBI_Ocbimv22012391m.p,OCTBI_Ocbimv22012392m.p,OCTBI_Ocbimv22012393m.p
2534	CALMI	2533(OCTBI),4326(EUPSC)	EUPSC,CALMI,OCTBI	oct001994F:9178..264378	255200	CALMI_Omin004298p,CALMI_Omin004303p,CALMI_Omin004297p,CALMI_Omin004302p,CALMI_Omin004299p
2871	CALMI	2872(OCTBI)	OCTBI,CALMI	oct005962F:118794..159238	40444	CALMI_Omin015370p,CALMI_Omin015371p,CALMI_Omin015369p
3365	OCTBI	3366(CALMI),4153(EUPSC)	OCTBI,CALMI,EUPSC	KQ421263:251614..671421	419807	OCTBI_Ocbimv22031504m.p,OCTBI_Ocbimv22031505m.p,OCTBI_Ocbimv22031506m.p,OCTBI_Ocbimv22031508m.p,OCTBI_Ocbimv22031509m.p,OCTBI_Ocbimv22031511m.p
3339	CALMI	4361(EUPSC)	CALMI,EUPSC	oct019497F:9575..55719	46144	CALMI_Omin017143p,CALMI_Omin017142p,CALMI_Omin017144p
3621	CALMI	3620(OCTBI)	CALMI,OCTBI	oct002341F:75852..333953	258101	CALMI_Omin008743p,CALMI_Omin008745p,CALMI_Omin008741p
13943	EUPSC	13942(OCTBI)	EUPSC,OCTBI	Lachesis_group29__46_contigs__length_89259793:55909257..56260651	351394	EUPSC_cluster_20181,EUPSC_cluster_20180,EUPSC_cluster_20179,EUPSC_cluster_1412	PF03098 Animal haem peroxidase-PF03098 Animal haem peroxidase; PF03098 Animal haem peroxidase; ; PF01728 FtsJ-like methyltransferase
2881	OCTBI	2880(CALMI)	CALMI,OCTBI	KQ420877:14064..126577	112513	OCTBI_Ocbimv22029995m.p,OCTBI_Ocbimv22029996m.p,OCTBI_Ocbimv22029998m.p
14443	EUPSC	14444(OCTBI)	EUPSC,OCTBI	Lachesis_group25__42_contigs__length_94613958:64559525..64656757	97232	EUPSC_cluster_6730,EUPSC_cluster_9449,EUPSC_cluster_13149	PF15057 Domain of unknown function (DUF4537)-PF13768 von Willebrand factor type A domain; PF14813 NADH dehydrogenase 1 beta subcomplex subunit 2; PF02932 Neurotransmitter-gated ion-channel transmembrane region-PF02931 Neurotransmitter-gated ion-channel ligand binding domain
14497	OCTBI	14496(EUPSC)	OCTBI,EUPSC	KQ424367:1542..204443	202901	OCTBI_Ocbimv22001593m.p,OCTBI_Ocbimv22001594m.p,OCTBI_Ocbimv22001596m.p,OCTBI_Ocbimv22001597m.p,OCTBI_Ocbimv22001599m.p,OCTBI_Ocbimv22001601m.p
13946	EUPSC	13947(OCTBI)	EUPSC,OCTBI	Lachesis_group12__46_contigs__length_133395132:65070473..65180698	110225	EUPSC_cluster_904,EUPSC_cluster_11511,EUPSC_cluster_4358	PF07544 RNA polymerase II transcription mediator complex subunit 9-PF06372 Gemin6 protein; PF05153 Myo-inositol oxygenase; PF05153 Myo-inositol oxygenase
13997	OCTBI	13996(EUPSC)	EUPSC,OCTBI	KQ416380:43685..430412	386727	OCTBI_Ocbimv22030983m.p,OCTBI_Ocbimv22030984m.p,OCTBI_Ocbimv22030987m.p,OCTBI_Ocbimv22030989m.p,OCTBI_Ocbimv22030991m.p
3214	CALMI	3215(OCTBI)	OCTBI,CALMI	oct001653F:87186..382525	295339	CALMI_Omin002673p,CALMI_Omin002670p,CALMI_Omin002672p,CALMI_Omin002674p,CALMI_Omin002671p
14446	EUPSC	14447(OCTBI)	OCTBI,EUPSC	Lachesis_group17__52_contigs__length_118315660:83597945..84108095	510150	EUPSC_cluster_23819,EUPSC_cluster_4909,EUPSC_cluster_3027	PF04991 LicD family; PF10211 Axonemal dynein light chain; PF04762 IKI3 family
3915	OCTBI	14466(EUPSC),3914(CALMI)	OCTBI,CALMI,EUPSC	KQ417087:910489..1159802	249313	OCTBI_Ocbimv22003435m.p,OCTBI_Ocbimv22003437m.p,OCTBI_Ocbimv22003438m.p,OCTBI_Ocbimv22003440m.p,OCTBI_Ocbimv22003442m.p,OCTBI_Ocbimv22003430m.p,OCTBI_Ocbimv22003433m.p
2554	CALMI	2553(OCTBI),4376(EUPSC)	EUPSC,CALMI,OCTBI	oct013184F:31177..92370	61193	CALMI_Omin028519p,CALMI_Omin028521p,CALMI_Omin028520p
14107	EUPSC	14108(OCTBI)	EUPSC,OCTBI	Lachesis_group4__56_contigs__length_174030884:143388227..143519807	131580	EUPSC_cluster_4632,EUPSC_cluster_18312,EUPSC_cluster_10749	PF17216 Rrp44-like cold shock domain-PF17215 S1 domain-PF00773 RNB domain; PF12861 Anaphase-promoting complex subunit 11 RING-H2 finger; PF12799 Leucine Rich repeats (2 copies)
3093	CALMI	3094(OCTBI)	CALMI,OCTBI	oct006787F:7369..123718	116349	CALMI_Omin015850p,CALMI_Omin015851p,CALMI_Omin015849p
2521	CALMI	2520(OCTBI)	OCTBI,CALMI	oct016850F:2884..66754	63870	CALMI_Omin018855p,CALMI_Omin018857p,CALMI_Omin018856p
2976	CALMI	4160(EUPSC),2977(OCTBI)	EUPSC,CALMI,OCTBI	oct006530F:495..53674	53179	CALMI_Omin012658p,CALMI_Omin012660p,CALMI_Omin012659p
13796	OCTBI	13795(EUPSC)	EUPSC,OCTBI	KQ416787:68276..128330	60054	OCTBI_Ocbimv22039276m.p,OCTBI_Ocbimv22039279m.p,OCTBI_Ocbimv22039280m.p
3461	CALMI	4498(EUPSC),3460(OCTBI)	EUPSC,CALMI,OCTBI	oct001077F:31501..469717	438216	CALMI_Omin007798p,CALMI_Omin007799p,CALMI_Omin007800p
4317	EUPSC	3753(OCTBI),3752(CALMI)	EUPSC,OCTBI,CALMI	Lachesis_group5__70_contigs__length_158228327:133069546..133636636	567090	EUPSC_cluster_78,EUPSC_cluster_10043,EUPSC_cluster_16129,EUPSC_cluster_19688,EUPSC_cluster_2987	PF00153 Mitochondrial carrier protein-PF00153 Mitochondrial carrier protein-PF00153 Mitochondrial carrier protein; PF13499 EF-hand domain pair-PF13499 EF-hand domain pair; ; PF00850 Histone deacetylase domain; PF00179 Ubiquitin-conjugating enzyme-PF12937 F-box-like
3590	OCTBI	3591(CALMI)	OCTBI,CALMI	KQ431108:94777..127039	32262	OCTBI_Ocbimv22019385m.p,OCTBI_Ocbimv22019386m.p,OCTBI_Ocbimv22019387m.p,OCTBI_Ocbimv22019388m.p
3775	CALMI	3774(OCTBI)	OCTBI,CALMI,EUPSC	oct005765F:50663..90000	39337	CALMI_Omin011567p,CALMI_Omin011569p,CALMI_Omin011568p
3359	OCTBI	3362(CALMI),3358(CALMI)	OCTBI,CALMI	KQ427344:5734..80775	75041	OCTBI_Ocbimv22010271m.p,OCTBI_Ocbimv22010273m.p,OCTBI_Ocbimv22010274m.p,OCTBI_Ocbimv22010275m.p
3368	OCTBI	3367(CALMI),3446(CALMI)	CALMI,OCTBI	KQ417621:538386..583242	44856	OCTBI_Ocbimv22009889m.p,OCTBI_Ocbimv22009890m.p,OCTBI_Ocbimv22009891m.p,OCTBI_Ocbimv22009892m.p,OCTBI_Ocbimv22009888m.p
13931	OCTBI	13930(EUPSC)	EUPSC,OCTBI	KQ420009:8374..325383	317009	OCTBI_Ocbimv22026165m.p,OCTBI_Ocbimv22026168m.p,OCTBI_Ocbimv22026173m.p,OCTBI_Ocbimv22026176m.p
13896	EUPSC	13895(OCTBI)	OCTBI,EUPSC	Lachesis_group40__41_contigs__length_53238745:18211023..18649449	438426	EUPSC_cluster_20629,EUPSC_cluster_4843,EUPSC_cluster_5507,EUPSC_cluster_20630,EUPSC_cluster_12914,EUPSC_cluster_20631,EUPSC_cluster_10503	PF00854 POT family; PF14469 28 kDa A-kinase anchor; PF12895 Anaphase-promoting complex, cyclosome, subunit 3; PF00575 S1 RNA binding domain; ; ; PF12836 Helix-hairpin-helix motif-PF09371 Tex-like protein N-terminal domain-PF00472 RF-1 domain-PF16921 Tex protein YqgF-like domain
13847	OCTBI	9077(EUPSC)	EUPSC,OCTBI	KQ416444:241764..680690	438926	OCTBI_Ocbimv22032687m.p,OCTBI_Ocbimv22032688m.p,OCTBI_Ocbimv22032689m.p,OCTBI_Ocbimv22032690m.p,OCTBI_Ocbimv22032691m.p
14003	OCTBI	14004(EUPSC)	OCTBI,EUPSC	KQ418498:286491..580626	294135	OCTBI_Ocbimv22017457m.p,OCTBI_Ocbimv22017462m.p,OCTBI_Ocbimv22017464m.p
14273	EUPSC	14274(OCTBI)	OCTBI,EUPSC	Lachesis_group1__63_contigs__length_187967259:75795408..76153578	358170	EUPSC_cluster_11844,EUPSC_cluster_24564,EUPSC_cluster_5848	PF00036 EF hand-PF13499 EF-hand domain pair; PF00069 Protein kinase domain-PF12796 Ankyrin repeats (3 copies); PF02450 Lecithin:cholesterol acyltransferase
2986	OCTBI	2987(CALMI)	CALMI,OCTBI	KQ421305:535183..560213	25030	OCTBI_Ocbimv22031651m.p,OCTBI_Ocbimv22031652m.p,OCTBI_Ocbimv22031653m.p
3817	CALMI	3818(OCTBI)	CALMI,OCTBI	oct002209F:110474..290957	180483	CALMI_Omin000384p,CALMI_Omin000386p,CALMI_Omin000383p,CALMI_Omin000385p
13880	EUPSC	13881(OCTBI)	OCTBI,EUPSC	Lachesis_group17__52_contigs__length_118315660:79548946..79687806	138860	EUPSC_cluster_2842,EUPSC_cluster_25050,EUPSC_cluster_563	PF00400 WD domain, G-beta repeat-PF00400 WD domain, G-beta repeat-PF00400 WD domain, G-beta repeat-PF00400 WD domain, G-beta repeat-PF00400 WD domain, G-beta repeat-PF00400 WD domain, G-beta repeat-PF08513 LisH; PF10192 Rhodopsin-like GPCR transmembrane domain; PF08142 AARP2CN (NUC121) domain-PF04950 40S ribosome biogenesis protein Tsr1 and BMS1 C-terminal
3705	OCTBI	3706(CALMI)	CALMI,OCTBI	KQ415721:25516..399725	374209	OCTBI_Ocbimv22031126m.p,OCTBI_Ocbimv22031129m.p,OCTBI_Ocbimv22031130m.p,OCTBI_Ocbimv22031131m.p
2724	CALMI	2723(OCTBI)	EUPSC,OCTBI,CALMI	oct005235F:16820..107833	91013	CALMI_Omin011908p,CALMI_Omin011905p,CALMI_Omin011907p,CALMI_Omin011909p,CALMI_Omin011906p
11080	OCTBI	6842(EUPSC)	OCTBI,EUPSC	KQ415885:1389696..1631934	242238	OCTBI_Ocbimv22011420m.p,OCTBI_Ocbimv22011421m.p,OCTBI_Ocbimv22011423m.p,OCTBI_Ocbimv22011422m.p,OCTBI_Ocbimv22011424m.p
3430	CALMI	3429(OCTBI),4222(EUPSC)	OCTBI,CALMI,EUPSC	oct005754F:6606..220117	213511	CALMI_Omin011185p,CALMI_Omin011188p,CALMI_Omin011190p,CALMI_Omin011187p,CALMI_Omin011186p,CALMI_Omin011189p
2932	CALMI	4332(EUPSC),2705(OCTBI)	EUPSC,CALMI,OCTBI	oct002929F:35778..104694	68916	CALMI_Omin008891p,CALMI_Omin008888p,CALMI_Omin008887p,CALMI_Omin008889p
3122	CALMI	3123(OCTBI),4279(EUPSC)	EUPSC,CALMI,OCTBI	oct001580F:2345..258476	256131	CALMI_Omin003650p,CALMI_Omin003649p,CALMI_Omin003647p
4135	EUPSC	3348(CALMI),14482(OCTBI)	CALMI,OCTBI,EUPSC	Lachesis_group13__58_contigs__length_132030582:66088392..68459130	2370738	EUPSC_cluster_4109,EUPSC_cluster_14995,EUPSC_cluster_25860,EUPSC_cluster_25856,EUPSC_cluster_11981,EUPSC_cluster_25853,EUPSC_cluster_10039,EUPSC_cluster_6050,EUPSC_cluster_25855	PF00069 Protein kinase domain-PF07679 Immunoglobulin I-set domain-PF07679 Immunoglobulin I-set domain-PF07679 Immunoglobulin I-set domain-PF07679 Immunoglobulin I-set domain-PF07679 Immunoglobulin I-set domain-PF07679 Immunoglobulin I-set domain-PF07679 Immunoglobulin I-set domain-PF07679 Immunoglobulin I-set domain-PF07679 Immunoglobulin I-set domain-PF07679 Immunoglobulin I-set domain-PF07679 I…
13842	OCTBI	13843(EUPSC)	EUPSC,OCTBI	KQ419460:160575..223915	63340	OCTBI_Ocbimv22023692m.p,OCTBI_Ocbimv22023693m.p,OCTBI_Ocbimv22023695m.p
3046	CALMI	3045(OCTBI)	OCTBI,CALMI	oct002739F:6839..144169	137330	CALMI_Omin002407p,CALMI_Omin002403p,CALMI_Omin002406p
14284	EUPSC	2917(OCTBI)	OCTBI,CALMI,EUPSC	Lachesis_group18__53_contigs__length_106174747:87017619..87384146	366527	EUPSC_cluster_23251,EUPSC_cluster_2818,EUPSC_cluster_13137,EUPSC_cluster_2925,EUPSC_cluster_23250,EUPSC_cluster_2646,EUPSC_cluster_9038	; ; ; PF01248 Ribosomal protein L7Ae/L30e/S12e/Gadd45 family; PF06179 Surfeit locus protein 5 subunit 22 of Mediator complex; PF10258 PHAX RNA-binding domain; PF12047 Cytosine specific DNA methyltransferase replication foci domain-PF00145 C-5 cytosine-specific DNA methylase-PF01426 BAH domain-PF01426 BAH domain-PF02008 CXXC zinc finger domain
1234	EUPSC	13824(OCTBI)	EUPSC,OCTBI	Lachesis_group14__44_contigs__length_129294686:60931030..62488981	1557951	EUPSC_cluster_29045,EUPSC_cluster_6492,EUPSC_cluster_21528,EUPSC_cluster_6278,EUPSC_cluster_4513,EUPSC_cluster_12473,EUPSC_cluster_3880	PF00240 Ubiquitin family-PF01599 Ribosomal protein S27a; PF13181 Tetratricopeptide repeat-PF13181 Tetratricopeptide repeat; PF13499 EF-hand domain pair-PF13499 EF-hand domain pair; PF00004 ATPase family associated with various cellular activities (AAA)-PF09336 Vps4 C terminal oligomerisation domain; ; PF12706 Beta-lactamase superfamily domain-PF00753 Metallo-beta-lactamase superfamily; PF03099 Bi…
13848	EUPSC	13849(OCTBI)	EUPSC,OCTBI	Lachesis_group9__67_contigs__length_144638433:117490559..117701715	211156	EUPSC_cluster_2757,EUPSC_cluster_20162,EUPSC_cluster_8415,EUPSC_cluster_3770	PF05645 RNA polymerase III subunit RPC82; PF00270 DEAD/DEAH box helicase-PF13959 Domain of unknown function (DUF4217); PF05832 Eukaryotic protein of unknown function (DUF846); PF13812 Pentatricopeptide repeat domain
3097	OCTBI	3098(CALMI)	OCTBI,CALMI	KQ415873:97668..267342	169674	OCTBI_Ocbimv22010250m.p,OCTBI_Ocbimv22010252m.p,OCTBI_Ocbimv22010253m.p,OCTBI_Ocbimv22010254m.p,OCTBI_Ocbimv22010255m.p,OCTBI_Ocbimv22010256m.p
2751	CALMI	2752(OCTBI)	OCTBI,CALMI	oct011646F:47123..73743	26620	CALMI_Omin027124p,CALMI_Omin027123p,CALMI_Omin027125p
14102	EUPSC	3244(OCTBI)	CALMI,OCTBI,EUPSC	Lachesis_group41__39_contigs__length_54644242:22255130..22384599	129469	EUPSC_cluster_5851,EUPSC_cluster_2793,EUPSC_cluster_10193	PF15130 Domain of unknown function (DUF4566); PF01015 Ribosomal S3Ae family;
14233	OCTBI	14234(EUPSC)	EUPSC,OCTBI	KQ417086:78910..504480	425570	OCTBI_Ocbimv22003399m.p,OCTBI_Ocbimv22003400m.p,OCTBI_Ocbimv22003402m.p,OCTBI_Ocbimv22003408m.p
14108	OCTBI	14107(EUPSC)	EUPSC,OCTBI	KQ418633:205961..242010	36049	OCTBI_Ocbimv22018523m.p,OCTBI_Ocbimv22018524m.p,OCTBI_Ocbimv22018526m.p
13992	EUPSC	13991(OCTBI)	OCTBI,EUPSC	Lachesis_group34__47_contigs__length_76047342:69489684..70177862	688178	EUPSC_cluster_18252,EUPSC_cluster_18254,EUPSC_cluster_18255,EUPSC_cluster_9572	PF01699 Sodium/calcium exchanger protein-PF01699 Sodium/calcium exchanger protein-PF03733 Inner membrane component domain; ; ; PF00335 Tetraspanin family
14492	EUPSC	14491(OCTBI)	EUPSC,OCTBI	Lachesis_group10__55_contigs__length_138218214:73884925..74606880	721955	EUPSC_cluster_15631,EUPSC_cluster_11214,EUPSC_cluster_8450	PF03986 Autophagocytosis associated protein (Atg3), N-terminal domain-PF03987 Autophagocytosis associated protein, active-site domain-PF10381 Autophagocytosis associated protein C-terminal; PF02225 PA domain-PF13639 Ring finger domain; PF01734 Patatin-like phospholipase
3322	CALMI	3321(OCTBI),4366(EUPSC)	OCTBI,CALMI,EUPSC	oct000874F:416106..542892	126786	CALMI_Omin001810p,CALMI_Omin001813p,CALMI_Omin001817p,CALMI_Omin001816p
13998	EUPSC	3701(OCTBI)	EUPSC,OCTBI	Lachesis_group34__47_contigs__length_76047342:12038875..13578678	1539803	EUPSC_cluster_5845,EUPSC_cluster_15685,EUPSC_cluster_14506,EUPSC_cluster_29243,EUPSC_cluster_8013,EUPSC_cluster_15119,EUPSC_cluster_2317	PF10569 Alpha-macro-globulin thiol-ester bond-forming region-PF07703 Alpha-2-macroglobulin family N-terminal region-PF01835 MG2 domain-PF00207 Alpha-2-macroglobulin family-PF07678 A-macroglobulin complement component-PF07677 A-macroglobulin receptor; PF00719 Inorganic pyrophosphatase; PF04112 Mak10 subunit, NatC N(alpha)-terminal acetyltransferase-PF04112 Mak10 subunit, NatC N(alpha)-terminal ace…
14498	OCTBI	14499(EUPSC)	EUPSC,OCTBI	KQ416062:141831..250470	108639	OCTBI_Ocbimv22022220m.p,OCTBI_Ocbimv22022221m.p,OCTBI_Ocbimv22022222m.p
3813	OCTBI	3812(CALMI)	CALMI,OCTBI	KQ428420:24698..54105	29407	OCTBI_Ocbimv22013183m.p,OCTBI_Ocbimv22013184m.p,OCTBI_Ocbimv22013185m.p
4335	CALMI	4336(EUPSC)	EUPSC,CALMI	oct008727F:4399..120856	116457	CALMI_Omin016095p,CALMI_Omin016096p,CALMI_Omin016094p
2610	CALMI	2611(OCTBI)	CALMI,OCTBI	oct003091F:141045..251181	110136	CALMI_Omin007961p,CALMI_Omin007964p,CALMI_Omin007962p
4313	EUPSC	4314(CALMI)	CALMI,EUPSC	Lachesis_group28__49_contigs__length_91470296:56846754..57212121	365367	EUPSC_cluster_529,EUPSC_cluster_27922,EUPSC_cluster_27921	PF00622 SPRY domain-PF13671 AAA domain; PF13855 Leucine rich repeat-PF13855 Leucine rich repeat-PF13855 Leucine rich repeat-PF13855 Leucine rich repeat-PF13855 Leucine rich repeat-PF13855 Leucine rich repeat-PF01582 TIR domain;
14311	EUPSC	14312(OCTBI)	OCTBI,EUPSC	Lachesis_group22__46_contigs__length_104782409:83988795..84111275	122480	EUPSC_cluster_16183,EUPSC_cluster_6698,EUPSC_cluster_221	PF00388 Phosphatidylinositol-specific phospholipase C, X domain; PF02317 NAD/NADP octopine/nopaline dehydrogenase, alpha-helical domain; PF02317 NAD/NADP octopine/nopaline dehydrogenase, alpha-helical domain
3226	CALMI	3227(OCTBI)	OCTBI,CALMI	oct005262F:11422..128689	117267	CALMI_Omin010833p,CALMI_Omin010832p,CALMI_Omin010834p
4369	EUPSC	2506(CALMI),2505(OCTBI)	EUPSC,CALMI,OCTBI	Lachesis_group10__55_contigs__length_138218214:216895..866030	649135	EUPSC_cluster_15924,EUPSC_cluster_12861,EUPSC_cluster_8319,EUPSC_cluster_8683,EUPSC_cluster_15871,EUPSC_cluster_25448	PF03953 Tubulin C-terminal domain-PF00091 Tubulin/FtsZ family, GTPase domain; PF00076 RNA recognition motif. (a.k.a. RRM, RBD, or RNP domain); ; PF07714 Protein tyrosine kinase-PF00017 SH2 domain-PF00017 SH2 domain-PF12796 Ankyrin repeats (3 copies)-PF13637 Ankyrin repeats (many copies); ; PF01472 PUA domain
14405	OCTBI	14406(EUPSC)	EUPSC,OCTBI	KQ421871:320756..372194	51438	OCTBI_Ocbimv22033784m.p,OCTBI_Ocbimv22033785m.p,OCTBI_Ocbimv22033786m.p
13905	OCTBI	13904(EUPSC)	EUPSC,OCTBI	KQ419615:370561..569900	199339	OCTBI_Ocbimv22024686m.p,OCTBI_Ocbimv22024687m.p,OCTBI_Ocbimv22024688m.p,OCTBI_Ocbimv22024689m.p,OCTBI_Ocbimv22024690m.p,OCTBI_Ocbimv22024692m.p,OCTBI_Ocbimv22024693m.p,OCTBI_Ocbimv22024695m.p
13971	EUPSC	13970(OCTBI)	OCTBI,EUPSC	Lachesis_group42__34_contigs__length_44581599:22152930..22542162	389232	EUPSC_cluster_4985,EUPSC_cluster_24499,EUPSC_cluster_24506,EUPSC_cluster_5362	PF03345 Oligosaccharyltransferase 48 kDa subunit beta; PF01066 CDP-alcohol phosphatidyltransferase; PF13714 Phosphoenolpyruvate phosphomutase; PF04855 SNF5 / SMARCB1 / INI1-PF04855 SNF5 / SMARCB1 / INI1
4155	EUPSC	3350(OCTBI),3351(CALMI)	EUPSC,OCTBI,CALMI	Lachesis_group7__52_contigs__length_145002158:76972539..77349728	377189	EUPSC_cluster_8569,EUPSC_cluster_7697,EUPSC_cluster_3584,EUPSC_cluster_129	PF00096 Zinc finger, C2H2 type; PF10447 Exosome component EXOSC1/CSL4-PF14382 Exosome complex exonuclease RRP4 N-terminal region; ; PF00076 RNA recognition motif. (a.k.a. RRM, RBD, or RNP domain)-PF00076 RNA recognition motif. (a.k.a. RRM, RBD, or RNP domain)
2796	OCTBI	2797(CALMI)	CALMI,OCTBI	KQ415907:521405..564488	43083	OCTBI_Ocbimv22012330m.p,OCTBI_Ocbimv22012332m.p,OCTBI_Ocbimv22012333m.p
3708	OCTBI	3707(CALMI)	OCTBI,CALMI	KQ426816:88005..189868	101863	OCTBI_Ocbimv22008941m.p,OCTBI_Ocbimv22008944m.p,OCTBI_Ocbimv22008945m.p
3289	CALMI	3288(OCTBI)	CALMI,OCTBI	oct006929F:13918..103149	89231	CALMI_Omin016082p,CALMI_Omin016085p,CALMI_Omin016083p
2747	OCTBI	2748(CALMI)	CALMI,OCTBI	KQ419366:72826..124095	51269	OCTBI_Ocbimv22023162m.p,OCTBI_Ocbimv22023163m.p,OCTBI_Ocbimv22023164m.p,OCTBI_Ocbimv22023166m.p
2952	CALMI	2953(OCTBI)	CALMI,OCTBI	oct010951F:41568..116127	74559	CALMI_Omin028104p,CALMI_Omin028107p,CALMI_Omin028105p
2731	CALMI	3625(OCTBI)	OCTBI,CALMI,EUPSC	oct000188F:97873..211639	113766	CALMI_Omin008391p,CALMI_Omin008392p,CALMI_Omin008394p
14236	EUPSC	14235(OCTBI)	EUPSC,OCTBI	Lachesis_group17__52_contigs__length_118315660:105560898..105746535	185637	EUPSC_cluster_3581,EUPSC_cluster_13666,EUPSC_cluster_3226	PF05208 ALG3 protein; PF00010 Helix-loop-helix DNA-binding domain; PF07815 Abl-interactor HHR-PF14604 Variant SH3 domain
4496	CALMI	4497(EUPSC)	EUPSC,CALMI	oct006653F:69420..139436	70016	CALMI_Omin015801p,CALMI_Omin015798p,CALMI_Omin015799p
3510	CALMI	3151(OCTBI)	OCTBI,CALMI	oct009726F:3252..84968	81716	CALMI_Omin012683p,CALMI_Omin012684p,CALMI_Omin012682p,CALMI_Omin012685p
4447	EUPSC	4446(CALMI),14419(OCTBI)	EUPSC,OCTBI,CALMI	Lachesis_group13__58_contigs__length_132030582:59277316..59461161	183845	EUPSC_cluster_6386,EUPSC_cluster_13420,EUPSC_cluster_4858,EUPSC_cluster_10185	PF13181 Tetratricopeptide repeat-PF13181 Tetratricopeptide repeat-PF00226 DnaJ domain-PF14559 Tetratricopeptide repeat-PF14559 Tetratricopeptide repeat; PF14559 Tetratricopeptide repeat-PF14559 Tetratricopeptide repeat-PF13181 Tetratricopeptide repeat-PF13181 Tetratricopeptide repeat-PF00226 DnaJ domain; PF13815 Iguana/Dzip1-like DAZ-interacting protein N-terminal; PF00400 WD domain, G-beta repea…
3450	CALMI	3451(OCTBI)	CALMI,OCTBI	oct002481F:5921..177605	171684	CALMI_Omin004549p,CALMI_Omin004548p,CALMI_Omin004545p,CALMI_Omin004546p
14254	EUPSC	3458(OCTBI)	CALMI,OCTBI,EUPSC	Lachesis_group21__43_contigs__length_103963499:3202511..3550669	348158	EUPSC_cluster_15575,EUPSC_cluster_1736,EUPSC_cluster_13508,EUPSC_cluster_7991	PF01392 Fz domain-PF01390 SEA domain; PF01545 Cation efflux family; PF10205 Predicted coiled-coil domain-containing protein-PF10212 Predicted coiled-coil domain-containing protein; PF00326 Prolyl oligopeptidase family-PF00326 Prolyl oligopeptidase family-PF02897 Prolyl oligopeptidase, N-terminal beta-propeller domain-PF02897 Prolyl oligopeptidase, N-terminal beta-propeller domain
2666	CALMI	2667(OCTBI)	EUPSC,OCTBI,CALMI	oct013231F:36962..90533	53571	CALMI_Omin028282p,CALMI_Omin028280p,CALMI_Omin028281p
3957	OCTBI	3956(CALMI)	OCTBI,CALMI	KQ430089:21137..92634	71497	OCTBI_Ocbimv22016928m.p,OCTBI_Ocbimv22016929m.p,OCTBI_Ocbimv22016930m.p
3742	OCTBI	3741(CALMI)	CALMI,OCTBI	KQ417528:118736..310338	191602	OCTBI_Ocbimv22008729m.p,OCTBI_Ocbimv22008730m.p,OCTBI_Ocbimv22008731m.p,OCTBI_Ocbimv22008732m.p,OCTBI_Ocbimv22008734m.p,OCTBI_Ocbimv22008735m.p
3549	CALMI	3550(OCTBI)	OCTBI,CALMI	oct002326F:112856..222728	109872	CALMI_Omin003949p,CALMI_Omin003945p,CALMI_Omin003946p
14511	EUPSC	3154(OCTBI)	OCTBI,CALMI,EUPSC	Lachesis_group38__38_contigs__length_61810156:20078820..20295618	216798	EUPSC_cluster_2980,EUPSC_cluster_1707,EUPSC_cluster_2704	PF04969 CS domain; PF00076 RNA recognition motif. (a.k.a. RRM, RBD, or RNP domain)-PF00076 RNA recognition motif. (a.k.a. RRM, RBD, or RNP domain)-PF00076 RNA recognition motif. (a.k.a. RRM, RBD, or RNP domain); PF09738 LRRFIP family-PF01498 Transposase
2479	CALMI	2480(OCTBI)	EUPSC,OCTBI,CALMI	oct002789F:213839..312040	98201	CALMI_Omin007515p,CALMI_Omin007518p,CALMI_Omin007517p
4338	EUPSC	3074(CALMI),3075(OCTBI)	OCTBI,CALMI,EUPSC	Lachesis_group6__62_contigs__length_156955521:107853898..109908026	2054128	EUPSC_cluster_28427,EUPSC_cluster_1772,EUPSC_cluster_14061,EUPSC_cluster_14401,EUPSC_cluster_28429,EUPSC_cluster_22226,EUPSC_cluster_929,EUPSC_cluster_2543,EUPSC_cluster_8342	PF04004 Leo1-like protein; PF07904 Chromatin modification-related protein EAF7; PF10156 Subunit 17 of Mediator complex; PF00226 DnaJ domain-PF12171 Zinc-finger double-stranded RNA-binding; ; PF01428 AN1-like Zinc finger; PF00791 ZU5 domain-PF00595 PDZ domain (Also known as DHR or GLGF)-PF00595 PDZ domain (Also known as DHR or GLGF)-PF00595 PDZ domain (Also known as DHR or GLGF)-PF00625 Guanylate …
3058	OCTBI	3057(CALMI)	OCTBI,CALMI	KQ416933:475714..642096	166382	OCTBI_Ocbimv22001446m.p,OCTBI_Ocbimv22001448m.p,OCTBI_Ocbimv22001449m.p,OCTBI_Ocbimv22001451m.p
3838	CALMI	3839(OCTBI),4444(EUPSC)	EUPSC,CALMI,OCTBI	oct007638F:43869..137171	93302	CALMI_Omin012846p,CALMI_Omin012848p,CALMI_Omin012847p
3294	OCTBI	3295(CALMI)	CALMI,OCTBI	KQ417272:13157..60726	47569	OCTBI_Ocbimv22005663m.p,OCTBI_Ocbimv22005665m.p,OCTBI_Ocbimv22005667m.p
14045	EUPSC	14046(OCTBI)	EUPSC,OCTBI	Lachesis_group17__52_contigs__length_118315660:28914768..29274398	359630	EUPSC_cluster_682,EUPSC_cluster_6019,EUPSC_cluster_8197	PF00856 SET domain-PF00628 PHD-finger-PF00628 PHD-finger-PF05964 F/Y-rich N-terminus-PF05965 F/Y rich C-terminus-PF13771 PHD-like zinc-binding domain-PF13771 PHD-like zinc-binding domain; PF00118 TCP-1/cpn60 chaperonin family;
2801	CALMI	4303(EUPSC),2800(OCTBI)	CALMI,OCTBI,EUPSC	oct001454F:6988..319725	312737	CALMI_Omin007191p,CALMI_Omin007193p,CALMI_Omin007194p,CALMI_Omin007192p,CALMI_Omin007195p
14241	OCTBI	14240(EUPSC)	EUPSC,OCTBI	KQ420963:14715..61881	47166	OCTBI_Ocbimv22030359m.p,OCTBI_Ocbimv22030360m.p,OCTBI_Ocbimv22030361m.p,OCTBI_Ocbimv22030362m.p,OCTBI_Ocbimv22030363m.p
14528	OCTBI	4232(EUPSC)	OCTBI,CALMI,EUPSC	KQ416902:42004..277925	235921	OCTBI_Ocbimv22000989m.p,OCTBI_Ocbimv22000992m.p,OCTBI_Ocbimv22000993m.p,OCTBI_Ocbimv22000996m.p
14522	EUPSC	14523(OCTBI)	EUPSC,OCTBI	Lachesis_group13__58_contigs__length_132030582:85377409..86129482	752073	EUPSC_cluster_7126,EUPSC_cluster_24191,EUPSC_cluster_2446,EUPSC_cluster_6248,EUPSC_cluster_24190	PF00147 Fibrinogen beta and gamma chains, C-terminal globular domain; PF07701 Heme NO binding associated-PF00211 Adenylate and Guanylate cyclase catalytic domain-PF07700 Haem-NO-binding; PF13499 EF-hand domain pair-PF00071 Ras family; PF14753 Protein FAM221A/B; PF14753 Protein FAM221A/B-PF01477 PLAT/LH2 domain
3293	CALMI	3292(OCTBI),4218(EUPSC)	EUPSC,CALMI,OCTBI	oct000626F:93952..493895	399943	CALMI_Omin002965p,CALMI_Omin002963p,CALMI_Omin002968p,CALMI_Omin002967p,CALMI_Omin002964p,CALMI_Omin002966p,CALMI_Omin002969p
3471	CALMI	4181(EUPSC),3470(OCTBI)	CALMI,OCTBI,EUPSC	oct000246F:146829..336414	189585	CALMI_Omin003683p,CALMI_Omin003678p,CALMI_Omin003676p
3178	OCTBI	14185(EUPSC),3177(CALMI)	EUPSC,OCTBI,CALMI	KQ417681:45..648258	648213	OCTBI_Ocbimv22010468m.p,OCTBI_Ocbimv22010469m.p,OCTBI_Ocbimv22010470m.p,OCTBI_Ocbimv22010472m.p,OCTBI_Ocbimv22010474m.p,OCTBI_Ocbimv22010479m.p,OCTBI_Ocbimv22010480m.p
14035	OCTBI	14036(EUPSC)	OCTBI,EUPSC	KQ417062:122067..174028	51961	OCTBI_Ocbimv22003171m.p,OCTBI_Ocbimv22003172m.p,OCTBI_Ocbimv22003174m.p,OCTBI_Ocbimv22003175m.p
14231	EUPSC	3047(OCTBI)	OCTBI,EUPSC	Lachesis_group22__46_contigs__length_104782409:48551219..49460426	909207	EUPSC_cluster_29107,EUPSC_cluster_3111,EUPSC_cluster_23846,EUPSC_cluster_9310,EUPSC_cluster_4701,EUPSC_cluster_23845,EUPSC_cluster_23844	PF05010 Transforming acidic coiled-coil-containing protein (TACC); ; PF13923 Zinc finger, C3HC4 type (RING finger); ; ; PF05025 RbsD / FucU transport protein family; PF05493 ATP synthase subunit H
3657	OCTBI	3658(CALMI)	CALMI,OCTBI	KQ418964:968926..1075543	106617	OCTBI_Ocbimv22020784m.p,OCTBI_Ocbimv22020785m.p,OCTBI_Ocbimv22020786m.p,OCTBI_Ocbimv22020787m.p
2966	OCTBI	2965(CALMI)	OCTBI,CALMI	KQ426567:101961..252618	150657	OCTBI_Ocbimv22008104m.p,OCTBI_Ocbimv22008107m.p,OCTBI_Ocbimv22008108m.p,OCTBI_Ocbimv22008110m.p,OCTBI_Ocbimv22008113m.p,OCTBI_Ocbimv22008102m.p,OCTBI_Ocbimv22008114m.p,OCTBI_Ocbimv22008099m.p
2061	CALMI	3639(OCTBI)	OCTBI,CALMI	oct001017F:158130..444534	286404	CALMI_Omin009694p,CALMI_Omin009691p,CALMI_Omin009689p,CALMI_Omin009693p,CALMI_Omin009688p,CALMI_Omin009690p,CALMI_Omin009695p
13973	OCTBI	13972(EUPSC)	EUPSC,OCTBI	KQ421737:517784..1534992	1017208	OCTBI_Ocbimv22033161m.p,OCTBI_Ocbimv22033163m.p,OCTBI_Ocbimv22033164m.p,OCTBI_Ocbimv22033165m.p
9049	EUPSC	3626(OCTBI)	CALMI,OCTBI,EUPSC	Lachesis_group15__55_contigs__length_125787758:89749368..90320904	571536	EUPSC_cluster_3233,EUPSC_cluster_3036,EUPSC_cluster_2012	PF00069 Protein kinase domain; PF00622 SPRY domain;
14473	OCTBI	14472(EUPSC)	EUPSC,OCTBI	KQ429822:7407..97578	90171	OCTBI_Ocbimv22016337m.p,OCTBI_Ocbimv22016338m.p,OCTBI_Ocbimv22016344m.p
3809	CALMI	3808(OCTBI)	OCTBI,CALMI	oct003596F:73662..230818	157156	CALMI_Omin008944p,CALMI_Omin008941p,CALMI_Omin008945p
3388	OCTBI	3387(CALMI)	CALMI,OCTBI	KQ417216:153276..180726	27450	OCTBI_Ocbimv22004950m.p,OCTBI_Ocbimv22004951m.p,OCTBI_Ocbimv22004952m.p,OCTBI_Ocbimv22004953m.p
14313	EUPSC	14314(OCTBI)	EUPSC,OCTBI	Lachesis_group16__53_contigs__length_120303996:2169946..2299699	129753	EUPSC_cluster_3174,EUPSC_cluster_3175,EUPSC_cluster_7155	; ; PF06920 Dock homology region 2-PF06920 Dock homology region 2-PF11878 Domain of unknown function (DUF3398)-PF11878 Domain of unknown function (DUF3398)-PF14429 C2 domain in Dock180 and Zizimin proteins
14297	EUPSC	14298(OCTBI)	EUPSC,OCTBI	Lachesis_group1__63_contigs__length_187967259:129191530..129288178	96648	EUPSC_cluster_20613,EUPSC_cluster_6904,EUPSC_cluster_20611,EUPSC_cluster_10740	; PF00595 PDZ domain (Also known as DHR or GLGF); PF02953 Tim10/DDP family zinc finger; PF02953 Tim10/DDP family zinc finger
3695	OCTBI	14016(EUPSC),3694(CALMI)	OCTBI,CALMI,EUPSC	KQ421067:8106..62018	53912	OCTBI_Ocbimv22030685m.p,OCTBI_Ocbimv22030686m.p,OCTBI_Ocbimv22030688m.p,OCTBI_Ocbimv22030691m.p
4265	EUPSC	3553(OCTBI),3353(CALMI),3352(OCTBI)	EUPSC,OCTBI,CALMI	Lachesis_group24__36_contigs__length_98752639:55782767..56612361	829594	EUPSC_cluster_288,EUPSC_cluster_6560,EUPSC_cluster_14304,EUPSC_cluster_2206,EUPSC_cluster_4466,EUPSC_cluster_68	PF00651 BTB/POZ domain; PF08923 Mitogen-activated protein kinase kinase 1 interacting-PF13843 Transposase IS4; PF07528 DZF domain-PF07528 DZF domain; PF02204 Vacuolar sorting protein 9 (VPS9) domain-PF02493 MORN repeat-PF02493 MORN repeat-PF02493 MORN repeat-PF02493 MORN repeat-PF02493 MORN repeat-PF02493 MORN repeat-PF02493 MORN repeat-PF00415 Regulator of chromosome condensation (RCC1) repeat-P…
3481	CALMI	3480(OCTBI)	CALMI,OCTBI	oct001122F:52681..178827	126146	CALMI_Omin008055p,CALMI_Omin008065p,CALMI_Omin008061p,CALMI_Omin008056p
3378	OCTBI	3379(CALMI)	CALMI,OCTBI	KQ416068:94..49369	49275	OCTBI_Ocbimv22022407m.p,OCTBI_Ocbimv22022409m.p,OCTBI_Ocbimv22022412m.p
4239	EUPSC	2672(OCTBI)	EUPSC,OCTBI	Lachesis_group14__44_contigs__length_129294686:33459788..34385123	925335	EUPSC_cluster_7463,EUPSC_cluster_1120,EUPSC_cluster_7046,EUPSC_cluster_215,EUPSC_cluster_8046,EUPSC_cluster_11763,EUPSC_cluster_7953,EUPSC_cluster_3003	PF08600 Rsm1-like-PF07967 C3HC zinc finger-like; PF01344 Kelch motif-PF13964 Kelch motif-PF13964 Kelch motif-PF13418 Galactose oxidase, central domain; PF04095 Nicotinate phosphoribosyltransferase (NAPRTase) family; ; PF00651 BTB/POZ domain-PF07707 BTB And C-terminal Kelch-PF01344 Kelch motif-PF01344 Kelch motif-PF01344 Kelch motif-PF13964 Kelch motif; PF04871 Uso1 / p115 like vesicle tethering p…
2541	OCTBI	2540(CALMI)	CALMI,OCTBI	KQ418483:30279..247057	216778	OCTBI_Ocbimv22017330m.p,OCTBI_Ocbimv22017331m.p,OCTBI_Ocbimv22017332m.p,OCTBI_Ocbimv22017334m.p,OCTBI_Ocbimv22017341m.p,OCTBI_Ocbimv22017321m.p,OCTBI_Ocbimv22017326m.p
3765	OCTBI	14543(EUPSC)	OCTBI,EUPSC	KQ420162:62027..714865	652838	OCTBI_Ocbimv22027011m.p,OCTBI_Ocbimv22027012m.p,OCTBI_Ocbimv22027013m.p,OCTBI_Ocbimv22027003m.p,OCTBI_Ocbimv22027005m.p,OCTBI_Ocbimv22027006m.p,OCTBI_Ocbimv22027009m.p,OCTBI_Ocbimv22027010m.p
1909	CALMI	3467(OCTBI)	OCTBI,CALMI	oct000664F:37313..371883	334570	CALMI_Omin002536p,CALMI_Omin002537p,CALMI_Omin002535p,CALMI_Omin002531p,CALMI_Omin002534p,CALMI_Omin002533p,CALMI_Omin002538p,CALMI_Omin002532p,CALMI_Omin002539p
4314	CALMI	4313(EUPSC)	EUPSC,CALMI	oct005020F:12962..213302	200340	CALMI_Omin009957p,CALMI_Omin009959p,CALMI_Omin009956p
2770	OCTBI	14403(EUPSC),2771(CALMI)	EUPSC,OCTBI,CALMI	KQ420022:517862..636201	118339	OCTBI_Ocbimv22026276m.p,OCTBI_Ocbimv22026279m.p,OCTBI_Ocbimv22026281m.p,OCTBI_Ocbimv22026272m.p,OCTBI_Ocbimv22026274m.p,OCTBI_Ocbimv22026275m.p
2632	CALMI	4370(EUPSC),2631(OCTBI)	EUPSC,OCTBI,CALMI	oct006420F:21008..156290	135282	CALMI_Omin015926p,CALMI_Omin015927p,CALMI_Omin015925p,CALMI_Omin015928p
2861	CALMI	2862(OCTBI)	EUPSC,CALMI,OCTBI	oct003801F:55373..198858	143485	CALMI_Omin007104p,CALMI_Omin007105p,CALMI_Omin007106p
3175	OCTBI	4495(EUPSC),3176(CALMI)	CALMI,OCTBI,EUPSC	KQ418267:459895..618970	159075	OCTBI_Ocbimv22015566m.p,OCTBI_Ocbimv22015567m.p,OCTBI_Ocbimv22015569m.p,OCTBI_Ocbimv22015571m.p,OCTBI_Ocbimv22015574m.p
14513	OCTBI	14512(EUPSC)	EUPSC,OCTBI	KQ416771:240595..424960	184365	OCTBI_Ocbimv22038888m.p,OCTBI_Ocbimv22038889m.p,OCTBI_Ocbimv22038890m.p,OCTBI_Ocbimv22038895m.p,OCTBI_Ocbimv22038896m.p
14322	OCTBI	14321(EUPSC)	EUPSC,OCTBI	KQ418612:59438..425961	366523	OCTBI_Ocbimv22018382m.p,OCTBI_Ocbimv22018385m.p,OCTBI_Ocbimv22018387m.p
14328	EUPSC	14329(OCTBI)	EUPSC,OCTBI	Lachesis_group1__63_contigs__length_187967259:16039512..16383244	343732	EUPSC_cluster_7059,EUPSC_cluster_10156,EUPSC_cluster_3705,EUPSC_cluster_3071	PF00035 Double-stranded RNA binding motif; PF10218 Uncharacterized conserved protein (DUF2054); ; PF14580 Leucine-rich repeat
3641	OCTBI	3640(CALMI)	OCTBI,CALMI	KQ423217:2054..37714	35660	OCTBI_Ocbimv22038107m.p,OCTBI_Ocbimv22038108m.p,OCTBI_Ocbimv22038111m.p
14243	EUPSC	14242(OCTBI)	EUPSC,OCTBI	Lachesis_group43__26_contigs__length_23511657:338112..675101	336989	EUPSC_cluster_24001,EUPSC_cluster_24002,EUPSC_cluster_24003,EUPSC_cluster_24004,EUPSC_cluster_24005	PF10487 Nucleoporin subcomplex protein binding to Pom34-PF10487 Nucleoporin subcomplex protein binding to Pom34; ; PF06814 Lung seven transmembrane receptor; PF00856 SET domain; PF09273 Rubisco LSMT substrate-binding
3385	CALMI	3386(OCTBI)	OCTBI,CALMI,EUPSC	oct016229F:10013..96636	86623	CALMI_Omin018321p,CALMI_Omin018325p,CALMI_Omin018323p
3637	CALMI	3638(OCTBI)	OCTBI,CALMI	oct000182F:5814..277562	271748	CALMI_Omin007574p,CALMI_Omin007573p,CALMI_Omin007576p
3814	CALMI	2576(OCTBI)	EUPSC,CALMI,OCTBI	oct008399F:5693..99729	94036	CALMI_Omin011206p,CALMI_Omin011205p,CALMI_Omin011207p
2910	OCTBI	2909(CALMI)	OCTBI,CALMI	KQ417458:35288..304822	269534	OCTBI_Ocbimv22007881m.p,OCTBI_Ocbimv22007883m.p,OCTBI_Ocbimv22007884m.p,OCTBI_Ocbimv22007889m.p
13976	EUPSC	13975(OCTBI)	EUPSC,OCTBI	Lachesis_group34__47_contigs__length_76047342:73742676..74002307	259631	EUPSC_cluster_6602,EUPSC_cluster_19904,EUPSC_cluster_11716	PF02127 Aminopeptidase I zinc metalloprotease (M18)-PF04218 CENP-B N-terminal DNA-binding domain-PF03221 Tc5 transposase DNA-binding domain; ; PF00012 Hsp70 protein
14476	OCTBI	14477(EUPSC)	EUPSC,OCTBI	KQ426944:111883..374601	262718	OCTBI_Ocbimv22009270m.p,OCTBI_Ocbimv22009272m.p,OCTBI_Ocbimv22009274m.p,OCTBI_Ocbimv22009275m.p,OCTBI_Ocbimv22009276m.p
14019	OCTBI	14020(EUPSC)	EUPSC,OCTBI	KQ422351:42218..193297	151079	OCTBI_Ocbimv22035294m.p,OCTBI_Ocbimv22035296m.p,OCTBI_Ocbimv22035297m.p,OCTBI_Ocbimv22035299m.p
4259	EUPSC	3805(CALMI)	CALMI,OCTBI,EUPSC	Lachesis_group13__58_contigs__length_132030582:74454747..74504297	49550	EUPSC_cluster_11187,EUPSC_cluster_9146,EUPSC_cluster_12710	PF00857 Isochorismatase family; PF05817 Oligosaccharyltransferase subunit Ribophorin II; PF01712 Deoxynucleoside kinase
2557	OCTBI	4216(EUPSC),3780(CALMI),2556(CALMI)	CALMI,OCTBI,EUPSC	KQ424397:33605..90668	57063	OCTBI_Ocbimv22001732m.p,OCTBI_Ocbimv22001733m.p,OCTBI_Ocbimv22001734m.p
4268	EUPSC	3730(OCTBI),3731(CALMI)	EUPSC,OCTBI,CALMI	Lachesis_group28__49_contigs__length_91470296:1679748..2970109	1290361	EUPSC_cluster_3606,EUPSC_cluster_11980,EUPSC_cluster_10017,EUPSC_cluster_29078	PF02208 Sorbin homologous domain-PF00018 SH3 domain-PF14604 Variant SH3 domain-PF14604 Variant SH3 domain; PF00514 Armadillo/beta-catenin-like repeat; ;
13832	OCTBI	13833(EUPSC)	OCTBI,EUPSC	KQ419500:852451..873043	20592	OCTBI_Ocbimv22023930m.p,OCTBI_Ocbimv22023931m.p,OCTBI_Ocbimv22023932m.p
2949	OCTBI	2948(CALMI)	CALMI,OCTBI	KQ424160:105843..130392	24549	OCTBI_Ocbimv22001046m.p,OCTBI_Ocbimv22001047m.p,OCTBI_Ocbimv22001048m.p
2780	CALMI	2781(OCTBI)	OCTBI,CALMI	oct000826F:345667..494540	148873	CALMI_Omin004635p,CALMI_Omin004631p,CALMI_Omin004630p
14316	OCTBI	14315(EUPSC)	OCTBI,EUPSC	KQ419326:367150..464833	97683	OCTBI_Ocbimv22022920m.p,OCTBI_Ocbimv22022921m.p,OCTBI_Ocbimv22022922m.p
14062	EUPSC	14061(OCTBI)	EUPSC,OCTBI	Lachesis_group13__58_contigs__length_132030582:103527391..103793006	265615	EUPSC_cluster_4214,EUPSC_cluster_18877,EUPSC_cluster_1783,EUPSC_cluster_1389	PF00575 S1 RNA binding domain-PF00098 Zinc knuckle; PF15696 RAD51 interacting motif; PF15475 Transmembrane protein C12orf23, UPF0444; PF06342 Alpha/beta hydrolase of unknown function (DUF1057)
3375	CALMI	2719(OCTBI)	OCTBI,CALMI	oct002602F:7486..346411	338925	CALMI_Omin006261p,CALMI_Omin006262p,CALMI_Omin006263p,CALMI_Omin006260p
3552	CALMI	3553(OCTBI)	EUPSC,OCTBI,CALMI	oct002830F:239467..298946	59479	CALMI_Omin001927p,CALMI_Omin001925p,CALMI_Omin001928p
14068	OCTBI	14067(EUPSC)	OCTBI,EUPSC	KQ419392:28567..60049	31482	OCTBI_Ocbimv22023282m.p,OCTBI_Ocbimv22023284m.p,OCTBI_Ocbimv22023287m.p
2723	OCTBI	4139(EUPSC),2724(CALMI)	OCTBI,CALMI,EUPSC	KQ421476:54744..337800	283056	OCTBI_Ocbimv22032188m.p,OCTBI_Ocbimv22032189m.p,OCTBI_Ocbimv22032191m.p,OCTBI_Ocbimv22032192m.p,OCTBI_Ocbimv22032194m.p,OCTBI_Ocbimv22032195m.p,OCTBI_Ocbimv22032198m.p,OCTBI_Ocbimv22032199m.p
14114	EUPSC	14115(OCTBI)	EUPSC,OCTBI	Lachesis_group1__63_contigs__length_187967259:168006199..168996402	990203	EUPSC_cluster_15154,EUPSC_cluster_15125,EUPSC_cluster_559,EUPSC_cluster_7552	PF01039 Carboxyl transferase domain; PF09298 Fumarylacetoacetase N-terminal-PF01557 Fumarylacetoacetate (FAA) hydrolase family; ; PF13637 Ankyrin repeats (many copies)
4480	CALMI	4479(EUPSC)	EUPSC,CALMI	oct001231F:247981..251797	3816	CALMI_Omin001803p,CALMI_Omin001804p,CALMI_Omin001805p,CALMI_Omin001800p
3768	CALMI	3769(OCTBI)	CALMI,OCTBI	oct005726F:619..196481	195862	CALMI_Omin014975p,CALMI_Omin014976p,CALMI_Omin014977p
3412	OCTBI	9067(EUPSC),3411(CALMI)	OCTBI,CALMI,EUPSC	KQ424055:390501..709315	318814	OCTBI_Ocbimv22000688m.p,OCTBI_Ocbimv22000694m.p,OCTBI_Ocbimv22000695m.p,OCTBI_Ocbimv22000685m.p,OCTBI_Ocbimv22000687m.p
13837	EUPSC	13836(OCTBI)	OCTBI,EUPSC	Lachesis_group30__51_contigs__length_87052432:13778325..13929763	151438	EUPSC_cluster_27103,EUPSC_cluster_27102,EUPSC_cluster_27101,EUPSC_cluster_27100,EUPSC_cluster_3538,EUPSC_cluster_163	PF01007 Inward rectifier potassium channel; PF01007 Inward rectifier potassium channel; ; PF01007 Inward rectifier potassium channel; PF07757 Predicted AdoMet-dependent methyltransferase; PF07002 Copine
13791	OCTBI	13792(EUPSC)	OCTBI,EUPSC	KQ421838:125400..152707	27307	OCTBI_Ocbimv22033581m.p,OCTBI_Ocbimv22033582m.p,OCTBI_Ocbimv22033583m.p
2676	CALMI	2675(OCTBI)	OCTBI,CALMI	oct003042F:196517..268067	71550	CALMI_Omin006914p,CALMI_Omin006919p,CALMI_Omin006916p,CALMI_Omin006917p,CALMI_Omin006920p
14564	EUPSC	14565(OCTBI)	OCTBI,EUPSC	Lachesis_group30__51_contigs__length_87052432:24269738..24819772	550034	EUPSC_cluster_6619,EUPSC_cluster_10615,EUPSC_cluster_2960,EUPSC_cluster_11047,EUPSC_cluster_21030	PF01145 SPFH domain / Band 7 family-PF15975 Flotillin; PF01145 SPFH domain / Band 7 family-PF00149 Calcineurin-like phosphoesterase; PF14559 Tetratricopeptide repeat; PF13336 Acetyl-CoA hydrolase/transferase C-terminal domain-PF02550 Acetyl-CoA hydrolase/transferase N-terminal domain; PF09778 Guanylylate cyclase
3615	OCTBI	3616(CALMI)	OCTBI,CALMI	KQ423797:189818..242359	52541	OCTBI_Ocbimv22039924m.p,OCTBI_Ocbimv22039925m.p,OCTBI_Ocbimv22039929m.p
2830	OCTBI	2829(CALMI)	OCTBI,CALMI	KQ421203:35653..124332	88679	OCTBI_Ocbimv22031229m.p,OCTBI_Ocbimv22031231m.p,OCTBI_Ocbimv22031232m.p
14067	EUPSC	14068(OCTBI)	EUPSC,OCTBI	Lachesis_group39__38_contigs__length_50967332:9368778..9537005	168227	EUPSC_cluster_10683,EUPSC_cluster_12960,EUPSC_cluster_6790	PF00412 LIM domain-PF00412 LIM domain; PF12717 non-SMC mitotic condensation complex subunit 1; PF00098 Zinc knuckle-PF00076 RNA recognition motif. (a.k.a. RRM, RBD, or RNP domain)
13941	OCTBI	13940(EUPSC)	OCTBI,EUPSC	KQ430963:76908..230286	153378	OCTBI_Ocbimv22019091m.p,OCTBI_Ocbimv22019093m.p,OCTBI_Ocbimv22019094m.p,OCTBI_Ocbimv22019095m.p
14441	OCTBI	14442(EUPSC)	EUPSC,OCTBI	KQ422794:183199..314898	131699	OCTBI_Ocbimv22036579m.p,OCTBI_Ocbimv22036582m.p,OCTBI_Ocbimv22036584m.p,OCTBI_Ocbimv22036586m.p,OCTBI_Ocbimv22036588m.p
13889	EUPSC	13888(OCTBI)	OCTBI,EUPSC	Lachesis_group10__55_contigs__length_138218214:26587184..26987757	400573	EUPSC_cluster_14149,EUPSC_cluster_9699,EUPSC_cluster_28765,EUPSC_cluster_522	; PF13499 EF-hand domain pair; PF10629 Protein of unknown function (DUF2475); PF03071 GNT-I family-PF15711 Interleukin-like EMT inducer
3079	CALMI	3080(OCTBI),4201(EUPSC)	EUPSC,OCTBI,CALMI	oct006266F:53670..105044	51374	CALMI_Omin013417p,CALMI_Omin013415p,CALMI_Omin013416p
14163	EUPSC	2728(OCTBI)	OCTBI,CALMI,EUPSC	Lachesis_group22__46_contigs__length_104782409:34131692..34430598	298906	EUPSC_cluster_16093,EUPSC_cluster_16511,EUPSC_cluster_16512,EUPSC_cluster_16513	PF02317 NAD/NADP octopine/nopaline dehydrogenase, alpha-helical domain; PF02317 NAD/NADP octopine/nopaline dehydrogenase, alpha-helical domain; ; PF00071 Ras family
2727	CALMI	2728(OCTBI)	EUPSC,CALMI,OCTBI	oct003009F:38796..256470	217674	CALMI_Omin000812p,CALMI_Omin000810p,CALMI_Omin000811p,CALMI_Omin000813p
2700	CALMI	2701(OCTBI)	CALMI,OCTBI	oct003134F:60300..255582	195282	CALMI_Omin000780p,CALMI_Omin000777p,CALMI_Omin000775p
4222	EUPSC	3430(CALMI),3429(OCTBI)	OCTBI,CALMI,EUPSC	Lachesis_group30__51_contigs__length_87052432:14178039..14553932	375893	EUPSC_cluster_26768,EUPSC_cluster_26766,EUPSC_cluster_9098,EUPSC_cluster_10825	PF02230 Phospholipase/Carboxylesterase; PF00326 Prolyl oligopeptidase family; PF13516 Leucine Rich repeat-PF13516 Leucine Rich repeat-PF07834 RanGAP1 C-terminal domain; PF08477 Ras of Complex, Roc, domain of DAPkinase
3235	CALMI	4459(EUPSC),3234(OCTBI)	EUPSC,OCTBI,CALMI	oct001827F:4580..196726	192146	CALMI_Omin001594p,CALMI_Omin001593p,CALMI_Omin001592p
13891	EUPSC	13890(OCTBI)	OCTBI,EUPSC	Lachesis_group35__42_contigs__length_70637049:54925006..55119885	194879	EUPSC_cluster_5501,EUPSC_cluster_7968,EUPSC_cluster_21135	PF02099 Josephin-PF02809 Ubiquitin interaction motif-PF02809 Ubiquitin interaction motif; PF03360 Glycosyltransferase family 43-PF01359 Transposase (partial DDE domain); PF01753 MYND finger
3826	CALMI	4412(EUPSC),3825(OCTBI)	CALMI,OCTBI,EUPSC	oct000338F:11682..206913	195231	CALMI_Omin007568p,CALMI_Omin007567p,CALMI_Omin007569p,CALMI_Omin007570p
3105	CALMI	3106(OCTBI)	CALMI,OCTBI	oct012545F:50639..96066	45427	CALMI_Omin025728p,CALMI_Omin025727p,CALMI_Omin025729p
2686	OCTBI	14380(EUPSC)	OCTBI,EUPSC	KQ417009:778330..1276202	497872	OCTBI_Ocbimv22002420m.p,OCTBI_Ocbimv22002421m.p,OCTBI_Ocbimv22002422m.p,OCTBI_Ocbimv22002417m.p,OCTBI_Ocbimv22002418m.p,OCTBI_Ocbimv22002419m.p,OCTBI_Ocbimv22002424m.p
4326	EUPSC	2534(CALMI),2533(OCTBI)	CALMI,OCTBI,EUPSC	Lachesis_group14__44_contigs__length_129294686:71602041..73201031	1598990	EUPSC_cluster_3138,EUPSC_cluster_6613,EUPSC_cluster_6890,EUPSC_cluster_19820,EUPSC_cluster_3497,EUPSC_cluster_5655	; PF09379 FERM N-terminal domain-PF00373 FERM central domain-PF09380 FERM C-terminal PH-like domain; PF10350 Putative death-receptor fusion protein (DUF2428); PF10350 Putative death-receptor fusion protein (DUF2428); ; PF02174 PTB domain (IRS-1 type)
2469	CALMI	4463(EUPSC),2470(OCTBI)	EUPSC,CALMI,OCTBI	oct003175F:20842..256889	236047	CALMI_Omin001863p,CALMI_Omin001867p,CALMI_Omin001865p,CALMI_Omin001862p,CALMI_Omin001866p
3213	CALMI	3212(OCTBI)	OCTBI,CALMI	oct001678F:4752..202684	197932	CALMI_Omin007151p,CALMI_Omin007152p,CALMI_Omin007155p,CALMI_Omin007154p
14436	OCTBI	14437(EUPSC)	OCTBI,EUPSC	KQ418431:7362..315328	307966	OCTBI_Ocbimv22016967m.p,OCTBI_Ocbimv22016974m.p,OCTBI_Ocbimv22016975m.p
2518	OCTBI	4290(EUPSC),2519(CALMI)	CALMI,OCTBI,EUPSC	KQ418175:388019..773773	385754	OCTBI_Ocbimv22014757m.p,OCTBI_Ocbimv22014758m.p,OCTBI_Ocbimv22014759m.p,OCTBI_Ocbimv22014750m.p,OCTBI_Ocbimv22014751m.p,OCTBI_Ocbimv22014752m.p
13936	OCTBI	13937(EUPSC)	OCTBI,EUPSC	KQ418431:348410..534650	186240	OCTBI_Ocbimv22016976m.p,OCTBI_Ocbimv22016978m.p,OCTBI_Ocbimv22016981m.p
4427	EUPSC	3569(CALMI)	OCTBI,CALMI,EUPSC	Lachesis_group3__52_contigs__length_175295898:82349852..82641570	291718	EUPSC_cluster_5990,EUPSC_cluster_6989,EUPSC_cluster_4166,EUPSC_cluster_9409	PF04667 cAMP-regulated phosphoprotein/endosulfine conserved region; PF00702 haloacid dehalogenase-like hydrolase; PF00665 Integrase core domain-PF09668 Aspartyl protease-PF01663 Type I phosphodiesterase / nucleotide pyrophosphatase-PF00078 Reverse transcriptase (RNA-dependent DNA polymerase); PF02515 CoA-transferase family III
4400	EUPSC	2789(OCTBI),2788(CALMI)	OCTBI,CALMI,EUPSC	Lachesis_group1__63_contigs__length_187967259:76354467..76665602	311135	EUPSC_cluster_9343,EUPSC_cluster_9376,EUPSC_cluster_254,EUPSC_cluster_24566,EUPSC_cluster_24569,EUPSC_cluster_6610	PF03159 XRN 5'-3' exonuclease N-terminus; PF00665 Integrase core domain-PF01257 Thioredoxin-like [2Fe-2S] ferredoxin; PF12796 Ankyrin repeats (3 copies); PF05222 Alanine dehydrogenase/PNT, N-terminal domain; ; PF10250 GDP-fucose protein O-fucosyltransferase
3269	CALMI	3000(OCTBI)	EUPSC,OCTBI,CALMI	oct015990F:6271..56788	50517	CALMI_Omin017406p,CALMI_Omin017407p,CALMI_Omin017405p
13789	EUPSC	2817(OCTBI)	OCTBI,CALMI,EUPSC	Lachesis_group3__52_contigs__length_175295898:71094372..71617038	522666	EUPSC_cluster_1057,EUPSC_cluster_19432,EUPSC_cluster_306	PF00339 Arrestin (or S-antigen), N-terminal domain-PF02752 Arrestin (or S-antigen), C-terminal domain; PF00400 WD domain, G-beta repeat-PF00400 WD domain, G-beta repeat; PF00995 Sec1 family
13954	EUPSC	13953(OCTBI)	OCTBI,EUPSC	Lachesis_group35__42_contigs__length_70637049:10398281..10630894	232613	EUPSC_cluster_3479,EUPSC_cluster_15007,EUPSC_cluster_1062	PF00397 WW domain-PF00078 Reverse transcriptase (RNA-dependent DNA polymerase); PF04712 Radial spokehead-like protein; PF00071 Ras family
13872	OCTBI	13871(EUPSC)	EUPSC,OCTBI	KQ417455:180398..300197	119799	OCTBI_Ocbimv22007851m.p,OCTBI_Ocbimv22007853m.p,OCTBI_Ocbimv22007854m.p,OCTBI_Ocbimv22007855m.p
14454	EUPSC	14453(OCTBI)	EUPSC,OCTBI	Lachesis_group5__70_contigs__length_158228327:25219073..25886870	667797	EUPSC_cluster_3843,EUPSC_cluster_28048,EUPSC_cluster_9425	; ; PF00071 Ras family
2553	OCTBI	4376(EUPSC),2554(CALMI),3540(CALMI)	EUPSC,CALMI,OCTBI	KQ417118:192573..336988	144415	OCTBI_Ocbimv22003869m.p,OCTBI_Ocbimv22003870m.p,OCTBI_Ocbimv22003871m.p,OCTBI_Ocbimv22003864m.p
3722	CALMI	3721(OCTBI)	CALMI,OCTBI	oct018245F:1829..100485	98656	CALMI_Omin019894p,CALMI_Omin019892p,CALMI_Omin019890p,CALMI_Omin019891p,CALMI_Omin019893p
3094	OCTBI	3093(CALMI)	CALMI,OCTBI	KQ417455:385719..420647	34928	OCTBI_Ocbimv22007863m.p,OCTBI_Ocbimv22007864m.p,OCTBI_Ocbimv22007867m.p,OCTBI_Ocbimv22007868m.p
14500	OCTBI	14501(EUPSC)	EUPSC,OCTBI	KQ424851:374114..679235	305121	OCTBI_Ocbimv22002945m.p,OCTBI_Ocbimv22002947m.p,OCTBI_Ocbimv22002948m.p
2850	OCTBI	2851(CALMI),4414(EUPSC)	EUPSC,OCTBI,CALMI	KQ417611:381776..659092	277316	OCTBI_Ocbimv22009760m.p,OCTBI_Ocbimv22009765m.p,OCTBI_Ocbimv22009766m.p,OCTBI_Ocbimv22009768m.p,OCTBI_Ocbimv22009769m.p
14364	EUPSC	14363(OCTBI)	OCTBI,EUPSC	Lachesis_group7__52_contigs__length_145002158:38697780..39272377	574597	EUPSC_cluster_5817,EUPSC_cluster_21953,EUPSC_cluster_4264	PF01733 Nucleoside transporter; PF01733 Nucleoside transporter;
14433	OCTBI	4255(EUPSC)	EUPSC,OCTBI,CALMI	KQ425128:419533..532727	113194	OCTBI_Ocbimv22003836m.p,OCTBI_Ocbimv22003838m.p,OCTBI_Ocbimv22003840m.p
13933	EUPSC	13932(OCTBI)	OCTBI,EUPSC	Lachesis_group2__55_contigs__length_182973478:133975749..134117877	142128	EUPSC_cluster_13027,EUPSC_cluster_6512,EUPSC_cluster_1750	PF00112 Papain family cysteine protease-PF08246 Cathepsin propeptide inhibitor domain (I29); PF00004 ATPase family associated with various cellular activities (AAA)-PF09079 CDC6, C terminal winged helix domain-PF01426 BAH domain; PF14647 FAM91 N-terminus-PF14648 FAM91 C-terminus
3586	OCTBI	3585(CALMI),4482(EUPSC)	EUPSC,CALMI,OCTBI	KQ418413:233495..279522	46027	OCTBI_Ocbimv22016861m.p,OCTBI_Ocbimv22016862m.p,OCTBI_Ocbimv22016863m.p,OCTBI_Ocbimv22016864m.p
3342	OCTBI	3341(CALMI)	CALMI,OCTBI	KQ418945:808184..892272	84088	OCTBI_Ocbimv22020640m.p,OCTBI_Ocbimv22020641m.p,OCTBI_Ocbimv22020643m.p,OCTBI_Ocbimv22020644m.p,OCTBI_Ocbimv22020645m.p,OCTBI_Ocbimv22020649m.p
14292	OCTBI	6872(EUPSC)	OCTBI,EUPSC	KQ420265:4091..516058	511967	OCTBI_Ocbimv22027357m.p,OCTBI_Ocbimv22027360m.p,OCTBI_Ocbimv22027363m.p,OCTBI_Ocbimv22027364m.p,OCTBI_Ocbimv22027365m.p
14298	OCTBI	14297(EUPSC)	EUPSC,OCTBI	KQ423213:164342..243522	79180	OCTBI_Ocbimv22038086m.p,OCTBI_Ocbimv22038087m.p,OCTBI_Ocbimv22038088m.p,OCTBI_Ocbimv22038091m.p
2990	OCTBI	2991(CALMI)	OCTBI,CALMI	KQ419857:202660..267321	64661	OCTBI_Ocbimv22025592m.p,OCTBI_Ocbimv22025593m.p,OCTBI_Ocbimv22025594m.p
4179	CALMI	4180(EUPSC)	EUPSC,CALMI	oct003208F:161594..264469	102875	CALMI_Omin003913p,CALMI_Omin003912p,CALMI_Omin003914p
3618	CALMI	3617(OCTBI)	OCTBI,CALMI	oct001618F:148944..292445	143501	CALMI_Omin009470p,CALMI_Omin009475p,CALMI_Omin009469p,CALMI_Omin009473p
14075	OCTBI	14076(EUPSC)	OCTBI,EUPSC	KQ422903:286799..502836	216037	OCTBI_Ocbimv22037000m.p,OCTBI_Ocbimv22037001m.p,OCTBI_Ocbimv22037002m.p,OCTBI_Ocbimv22037006m.p
2629	CALMI	2630(OCTBI)	EUPSC,CALMI,OCTBI	oct005445F:1762..143317	141555	CALMI_Omin014849p,CALMI_Omin014851p,CALMI_Omin014850p
3889	OCTBI	3890(CALMI)	OCTBI,CALMI	KQ418571:291619..341347	49728	OCTBI_Ocbimv22018084m.p,OCTBI_Ocbimv22018086m.p,OCTBI_Ocbimv22018087m.p,OCTBI_Ocbimv22018090m.p
13859	EUPSC	13858(OCTBI)	EUPSC,OCTBI	Lachesis_group6__62_contigs__length_156955521:47240448..47542395	301947	EUPSC_cluster_27904,EUPSC_cluster_27902,EUPSC_cluster_27901,EUPSC_cluster_2076,EUPSC_cluster_6496	; ; ; PF04893 Yip1 domain; PF10171 Translocase of the Inner Mitochondrial membrane 29
14001	OCTBI	14002(EUPSC)	EUPSC,OCTBI	KQ418073:122339..322215	199876	OCTBI_Ocbimv22013954m.p,OCTBI_Ocbimv22013956m.p,OCTBI_Ocbimv22013960m.p
3576	OCTBI	3575(CALMI),3680(CALMI)	CALMI,OCTBI	KQ416764:67237..119516	52279	OCTBI_Ocbimv22038729m.p,OCTBI_Ocbimv22038731m.p,OCTBI_Ocbimv22038732m.p,OCTBI_Ocbimv22038733m.p
3401	CALMI	3402(OCTBI)	OCTBI,CALMI,EUPSC	oct002056F:285154..332406	47252	CALMI_Omin000722p,CALMI_Omin000726p,CALMI_Omin000724p
14024	OCTBI	14025(EUPSC)	EUPSC,OCTBI	KQ416544:25731..149699	123968	OCTBI_Ocbimv22034649m.p,OCTBI_Ocbimv22034650m.p,OCTBI_Ocbimv22034652m.p
2744	CALMI	2743(OCTBI)	CALMI,OCTBI	oct010578F:2597..122960	120363	CALMI_Omin024629p,CALMI_Omin024632p,CALMI_Omin024630p,CALMI_Omin024631p
3921	CALMI	3922(OCTBI)	OCTBI,CALMI	oct004809F:65585..189682	124097	CALMI_Omin007692p,CALMI_Omin007693p,CALMI_Omin007691p
14300	EUPSC	14299(OCTBI)	EUPSC,OCTBI	Lachesis_group1__63_contigs__length_187967259:91034727..91138940	104213	EUPSC_cluster_7067,EUPSC_cluster_5103,EUPSC_cluster_702,EUPSC_cluster_12899	PF00252 Ribosomal protein L16p/L10e; PF00071 Ras family; PF00226 DnaJ domain-PF11875 Domain of unknown function (DUF3395); PF10545 Alcohol dehydrogenase transcription factor Myb/SANT-like-PF10545 Alcohol dehydrogenase transcription factor Myb/SANT-like
3894	CALMI	3893(OCTBI)	CALMI,OCTBI	oct001382F:298881..400054	101173	CALMI_Omin009950p,CALMI_Omin009953p,CALMI_Omin009951p,CALMI_Omin009949p,CALMI_Omin009952p
14527	EUPSC	14526(OCTBI)	OCTBI,EUPSC	Lachesis_group21__43_contigs__length_103963499:61380269..61623248	242979	EUPSC_cluster_21975,EUPSC_cluster_6876,EUPSC_cluster_21976	PF00085 Thioredoxin; PF11717 RNA binding activity-knot of a chromodomain; PF11717 RNA binding activity-knot of a chromodomain
3238	OCTBI	3239(CALMI)	OCTBI,CALMI	KQ417911:886377..927468	41091	OCTBI_Ocbimv22012436m.p,OCTBI_Ocbimv22012437m.p,OCTBI_Ocbimv22012438m.p
2533	OCTBI	2534(CALMI),4326(EUPSC)	EUPSC,OCTBI,CALMI	KQ420820:5485..533314	527829	OCTBI_Ocbimv22029764m.p,OCTBI_Ocbimv22029765m.p,OCTBI_Ocbimv22029767m.p,OCTBI_Ocbimv22029768m.p,OCTBI_Ocbimv22029770m.p,OCTBI_Ocbimv22029756m.p,OCTBI_Ocbimv22029761m.p
3108	CALMI	3107(OCTBI),4240(EUPSC)	EUPSC,OCTBI,CALMI	oct006837F:1293..49005	47712	CALMI_Omin012285p,CALMI_Omin012284p,CALMI_Omin012286p
2515	OCTBI	2514(CALMI)	CALMI,OCTBI	KQ419175:355775..524172	168397	OCTBI_Ocbimv22022123m.p,OCTBI_Ocbimv22022124m.p,OCTBI_Ocbimv22022125m.p,OCTBI_Ocbimv22022129m.p,OCTBI_Ocbimv22022131m.p,OCTBI_Ocbimv22022133m.p,OCTBI_Ocbimv22022135m.p,OCTBI_Ocbimv22022136m.p
3879	CALMI	3880(OCTBI)	OCTBI,CALMI	oct000129F:349..122584	122235	CALMI_Omin006861p,CALMI_Omin006859p,CALMI_Omin006865p
3142	CALMI	4426(EUPSC)	EUPSC,CALMI	oct003516F:91313..177268	85955	CALMI_Omin002837p,CALMI_Omin002835p,CALMI_Omin002833p,CALMI_Omin002836p
4444	EUPSC	3838(CALMI),3839(OCTBI)	OCTBI,CALMI,EUPSC	Lachesis_group15__55_contigs__length_125787758:94848046..95016762	168716	EUPSC_cluster_19207,EUPSC_cluster_9727,EUPSC_cluster_19206,EUPSC_cluster_10547	PF11581 Antagonist of EGFR signalling, Argos; PF13848 Thioredoxin-like domain; ; PF13903 PMP-22/EMP/MP20/Claudin tight junction
4394	EUPSC	2894(OCTBI),2893(CALMI)	EUPSC,CALMI,OCTBI	Lachesis_group23__35_contigs__length_97660015:39319485..39461467	141982	EUPSC_cluster_20454,EUPSC_cluster_20455,EUPSC_cluster_10021	PF00058 Low-density lipoprotein receptor repeat class B; PF01359 Transposase (partial DDE domain)-PF00058 Low-density lipoprotein receptor repeat class B-PF00058 Low-density lipoprotein receptor repeat class B;
13984	EUPSC	13983(OCTBI)	EUPSC,OCTBI	Lachesis_group22__46_contigs__length_104782409:64636628..66702430	2065802	EUPSC_cluster_26555,EUPSC_cluster_4202,EUPSC_cluster_4503,EUPSC_cluster_4716,EUPSC_cluster_2424,EUPSC_cluster_26554,EUPSC_cluster_26553,EUPSC_cluster_1954,EUPSC_cluster_4717,EUPSC_cluster_26557,EUPSC_cluster_309,EUPSC_cluster_14367,EUPSC_cluster_26559,EUPSC_cluster_26558	; PF00406 Adenylate kinase; ; PF06294 CH-like domain in sperm protein-PF00406 Adenylate kinase; PF16095 C-terminal of Roc, COR, domain-PF00531 Death domain-PF13676 TIR domain; PF07177 Neuralized; PF07177 Neuralized; PF01248 Ribosomal protein L7Ae/L30e/S12e/Gadd45 family; PF06294 CH-like domain in sperm protein-PF00406 Adenylate kinase; PF12661 Human growth factor-like EGF-PF12661 Human growth fac…
14129	EUPSC	14128(OCTBI)	OCTBI,EUPSC	Lachesis_group2__55_contigs__length_182973478:66319165..66607729	288564	EUPSC_cluster_2019,EUPSC_cluster_25324,EUPSC_cluster_884	PF01545 Cation efflux family; PF14465 NFRKB Winged Helix-like; PF13012 Maintenance of mitochondrial structure and function-PF01398 JAB1/Mov34/MPN/PAD-1 ubiquitin protease
14484	EUPSC	14483(OCTBI)	EUPSC,OCTBI	Lachesis_group2__55_contigs__length_182973478:39935625..40123807	188182	EUPSC_cluster_20588,EUPSC_cluster_20589,EUPSC_cluster_5957,EUPSC_cluster_5958	PF03227 Gamma interferon inducible lysosomal thiol reductase (GILT); PF03227 Gamma interferon inducible lysosomal thiol reductase (GILT); PF12075 KN motif-PF12796 Ankyrin repeats (3 copies); PF12796 Ankyrin repeats (3 copies)-PF12796 Ankyrin repeats (3 copies)
3026	OCTBI	3027(CALMI)	CALMI,OCTBI	KQ417988:23797..56239	32442	OCTBI_Ocbimv22013144m.p,OCTBI_Ocbimv22013146m.p,OCTBI_Ocbimv22013147m.p
3954	CALMI	3955(OCTBI)	OCTBI,CALMI	oct009712F:8126..138144	130018	CALMI_Omin011039p,CALMI_Omin011041p,CALMI_Omin011042p
14563	EUPSC	14562(OCTBI)	OCTBI,EUPSC	Lachesis_group1__63_contigs__length_187967259:8469739..9681249	1211510	EUPSC_cluster_461,EUPSC_cluster_16284,EUPSC_cluster_13814,EUPSC_cluster_9802,EUPSC_cluster_22234	PF00595 PDZ domain (Also known as DHR or GLGF)-PF00595 PDZ domain (Also known as DHR or GLGF)-PF00595 PDZ domain (Also known as DHR or GLGF)-PF00595 PDZ domain (Also known as DHR or GLGF)-PF00595 PDZ domain (Also known as DHR or GLGF)-PF00595 PDZ domain (Also known as DHR or GLGF)-PF00595 PDZ domain (Also known as DHR or GLGF); PF00595 PDZ domain (Also known as DHR or GLGF)-PF00595 PDZ domain (Al…
2535	CALMI	2536(OCTBI)	CALMI,OCTBI	oct000512F:118..239205	239087	CALMI_Omin004481p,CALMI_Omin004485p,CALMI_Omin004486p,CALMI_Omin004480p
2692	OCTBI	2691(CALMI)	OCTBI,CALMI	KQ416810:1227133..1340133	113000	OCTBI_Ocbimv22039637m.p,OCTBI_Ocbimv22039638m.p,OCTBI_Ocbimv22039640m.p,OCTBI_Ocbimv22039642m.p
13787	EUPSC	13786(OCTBI)	EUPSC,OCTBI	Lachesis_group30__51_contigs__length_87052432:52634109..52852101	217992	EUPSC_cluster_13919,EUPSC_cluster_21452,EUPSC_cluster_7377	PF00400 WD domain, G-beta repeat; PF04045 Arp2/3 complex, 34 kD subunit p34-Arc;
14329	OCTBI	14328(EUPSC)	EUPSC,OCTBI	KQ421376:961924..1202913	240989	OCTBI_Ocbimv22031913m.p,OCTBI_Ocbimv22031916m.p,OCTBI_Ocbimv22031919m.p
4462	CALMI	4299(EUPSC)	CALMI,EUPSC	oct007963F:101679..174879	73200	CALMI_Omin012040p,CALMI_Omin012048p,CALMI_Omin012047p,CALMI_Omin012046p
3164	CALMI	3165(OCTBI)	CALMI,OCTBI,EUPSC	oct004121F:7487..255859	248372	CALMI_Omin008565p,CALMI_Omin008566p,CALMI_Omin008564p
3909	CALMI	4465(EUPSC),3910(OCTBI)	EUPSC,OCTBI,CALMI	oct001826F:13238..148669	135431	CALMI_Omin010382p,CALMI_Omin010380p,CALMI_Omin010385p,CALMI_Omin010381p
13990	OCTBI	13989(EUPSC)	EUPSC,OCTBI	KQ419751:39147..147764	108617	OCTBI_Ocbimv22025262m.p,OCTBI_Ocbimv22025263m.p,OCTBI_Ocbimv22025264m.p
3429	OCTBI	4222(EUPSC),3430(CALMI)	CALMI,OCTBI,EUPSC	KQ418495:311055..480017	168962	OCTBI_Ocbimv22017426m.p,OCTBI_Ocbimv22017427m.p,OCTBI_Ocbimv22017428m.p,OCTBI_Ocbimv22017429m.p,OCTBI_Ocbimv22017431m.p,OCTBI_Ocbimv22017433m.p
2558	OCTBI	2559(CALMI)	OCTBI,CALMI	KQ430573:4165..21959	17794	OCTBI_Ocbimv22018127m.p,OCTBI_Ocbimv22018128m.p,OCTBI_Ocbimv22018129m.p
3253	OCTBI	3254(CALMI)	OCTBI,CALMI	KQ423989:104135..195437	91302	OCTBI_Ocbimv22000534m.p,OCTBI_Ocbimv22000536m.p,OCTBI_Ocbimv22000537m.p
3646	CALMI	3645(OCTBI)	CALMI,OCTBI,EUPSC	oct002045F:78294..277611	199317	CALMI_Omin000752p,CALMI_Omin000753p,CALMI_Omin000751p,CALMI_Omin000756p,CALMI_Omin000754p,CALMI_Omin000758p,CALMI_Omin000755p
2762	CALMI	2763(OCTBI)	OCTBI,CALMI	oct014802F:23890..92927	69037	CALMI_Omin024013p,CALMI_Omin024014p,CALMI_Omin024015p
2513	CALMI	2512(OCTBI)	CALMI,OCTBI	oct000723F:17703..94266	76563	CALMI_Omin004777p,CALMI_Omin004778p,CALMI_Omin004779p
14486	OCTBI	14485(EUPSC)	EUPSC,OCTBI	KQ421549:32416..227551	195135	OCTBI_Ocbimv22032453m.p,OCTBI_Ocbimv22032456m.p,OCTBI_Ocbimv22032458m.p,OCTBI_Ocbimv22032461m.p,OCTBI_Ocbimv22032464m.p,OCTBI_Ocbimv22032467m.p
3218	OCTBI	3219(CALMI)	CALMI,OCTBI	KQ432655:12164..30843	18679	OCTBI_Ocbimv22022242m.p,OCTBI_Ocbimv22022243m.p,OCTBI_Ocbimv22022244m.p
13986	EUPSC	13985(OCTBI)	EUPSC,OCTBI	Lachesis_group23__35_contigs__length_97660015:69356779..70421638	1064859	EUPSC_cluster_1717,EUPSC_cluster_5939,EUPSC_cluster_23409	; PF00411 Ribosomal protein S11;
13840	OCTBI	13839(EUPSC)	OCTBI,EUPSC	KQ422015:1016143..1046108	29965	OCTBI_Ocbimv22034294m.p,OCTBI_Ocbimv22034295m.p,OCTBI_Ocbimv22034296m.p
14366	OCTBI	14367(EUPSC)	OCTBI,EUPSC	KQ418800:48583..149536	100953	OCTBI_Ocbimv22019693m.p,OCTBI_Ocbimv22019696m.p,OCTBI_Ocbimv22019698m.p,OCTBI_Ocbimv22019699m.p
3638	OCTBI	3637(CALMI)	CALMI,OCTBI	KQ420146:888..304392	303504	OCTBI_Ocbimv22026938m.p,OCTBI_Ocbimv22026939m.p,OCTBI_Ocbimv22026941m.p,OCTBI_Ocbimv22026944m.p
14453	OCTBI	14454(EUPSC)	OCTBI,EUPSC	KQ420859:51281..224177	172896	OCTBI_Ocbimv22029951m.p,OCTBI_Ocbimv22029953m.p,OCTBI_Ocbimv22029954m.p
14069	OCTBI	14070(EUPSC)	EUPSC,OCTBI	KQ416315:41016..316821	275805	OCTBI_Ocbimv22029654m.p,OCTBI_Ocbimv22029655m.p,OCTBI_Ocbimv22029657m.p
13953	OCTBI	13954(EUPSC)	OCTBI,EUPSC	KQ418289:4784..55961	51177	OCTBI_Ocbimv22015744m.p,OCTBI_Ocbimv22015746m.p,OCTBI_Ocbimv22015748m.p
13887	EUPSC	3357(OCTBI)	OCTBI,CALMI,EUPSC	Lachesis_group19__43_contigs__length_108131866:58141714..58615609	473895	EUPSC_cluster_1923,EUPSC_cluster_28723,EUPSC_cluster_28724,EUPSC_cluster_28725,EUPSC_cluster_28727	; ; PF11414 Adenomatous polyposis coli tumour suppressor protein; ; PF01529 DHHC palmitoyltransferase
2601	CALMI	2600(OCTBI)	EUPSC,OCTBI,CALMI	oct014597F:1999..89023	87024	CALMI_Omin025207p,CALMI_Omin025208p,CALMI_Omin025209p
13839	EUPSC	13840(OCTBI)	OCTBI,EUPSC	Lachesis_group35__42_contigs__length_70637049:18828588..18959968	131380	EUPSC_cluster_26094,EUPSC_cluster_11916,EUPSC_cluster_4934	; PF13918 PLD-like domain-PF00614 Phospholipase D Active site motif; PF00628 PHD-finger
14164	OCTBI	14165(EUPSC)	EUPSC,OCTBI	KQ421946:451176..537892	86716	OCTBI_Ocbimv22034019m.p,OCTBI_Ocbimv22034020m.p,OCTBI_Ocbimv22034022m.p
3364	CALMI	4276(EUPSC),3363(OCTBI)	EUPSC,CALMI,OCTBI	oct001223F:93706..189890	96184	CALMI_Omin005983p,CALMI_Omin005982p,CALMI_Omin005981p
14018	EUPSC	14017(OCTBI)	EUPSC,OCTBI	Lachesis_group3__52_contigs__length_175295898:19094047..19206493	112446	EUPSC_cluster_3628,EUPSC_cluster_2026,EUPSC_cluster_1265	PF17284 Spermidine synthase tetramerisation domain-PF01564 Spermine/spermidine synthase domain; ;
977	OCTBI	2969(CALMI),4319(EUPSC)	OCTBI,CALMI,EUPSC	KQ415687:1005989..1146543	140554	OCTBI_Ocbimv22021842m.p,OCTBI_Ocbimv22021844m.p,OCTBI_Ocbimv22021845m.p,OCTBI_Ocbimv22021834m.p,OCTBI_Ocbimv22021835m.p,OCTBI_Ocbimv22021838m.p,OCTBI_Ocbimv22021839m.p,OCTBI_Ocbimv22021841m.p,OCTBI_Ocbimv22021843m.p
14012	OCTBI	14013(EUPSC)	EUPSC,OCTBI	KQ416357:492928..896401	403473	OCTBI_Ocbimv22030580m.p,OCTBI_Ocbimv22030582m.p,OCTBI_Ocbimv22030583m.p
3103	OCTBI	13968(EUPSC),3104(CALMI)	EUPSC,CALMI,OCTBI	KQ417924:390762..531338	140576	OCTBI_Ocbimv22012665m.p,OCTBI_Ocbimv22012667m.p,OCTBI_Ocbimv22012670m.p,OCTBI_Ocbimv22012664m.p
3233	OCTBI	3232(CALMI)	CALMI,OCTBI	KQ421200:40811..73120	32309	OCTBI_Ocbimv22031200m.p,OCTBI_Ocbimv22031201m.p,OCTBI_Ocbimv22031202m.p
2961	OCTBI	2960(CALMI)	CALMI,OCTBI	KQ420821:129375..274198	144823	OCTBI_Ocbimv22029779m.p,OCTBI_Ocbimv22029780m.p,OCTBI_Ocbimv22029782m.p,OCTBI_Ocbimv22029783m.p
14127	EUPSC	14126(OCTBI)	OCTBI,EUPSC	Lachesis_group2__55_contigs__length_182973478:50260825..50573463	312638	EUPSC_cluster_8228,EUPSC_cluster_8786,EUPSC_cluster_8785,EUPSC_cluster_2965	; PF10300 Protein of unknown function (DUF3808); PF03669 Uncharacterised protein family (UPF0139);
3476	OCTBI	3475(CALMI)	CALMI,OCTBI	KQ424278:43730..73432	29702	OCTBI_Ocbimv22001335m.p,OCTBI_Ocbimv22001337m.p,OCTBI_Ocbimv22001338m.p
3377	CALMI	3376(OCTBI)	CALMI,OCTBI	oct003123F:72386..247698	175312	CALMI_Omin009635p,CALMI_Omin009633p,CALMI_Omin009634p,CALMI_Omin009632p
3784	OCTBI	14178(EUPSC)	OCTBI,EUPSC	KQ421984:107987..287519	179532	OCTBI_Ocbimv22034131m.p,OCTBI_Ocbimv22034132m.p,OCTBI_Ocbimv22034134m.p,OCTBI_Ocbimv22034128m.p,OCTBI_Ocbimv22034129m.p,OCTBI_Ocbimv22034136m.p,OCTBI_Ocbimv22034138m.p
14363	OCTBI	14364(EUPSC)	OCTBI,EUPSC	KQ415834:119854..246698	126844	OCTBI_Ocbimv22006719m.p,OCTBI_Ocbimv22006720m.p,OCTBI_Ocbimv22006723m.p
14434	OCTBI	14435(EUPSC)	EUPSC,OCTBI	KQ421022:17195..98822	81627	OCTBI_Ocbimv22030553m.p,OCTBI_Ocbimv22030554m.p,OCTBI_Ocbimv22030556m.p
3914	CALMI	3915(OCTBI)	OCTBI,CALMI,EUPSC	oct005485F:19868..198568	178700	CALMI_Omin015548p,CALMI_Omin015547p,CALMI_Omin015546p,CALMI_Omin015549p
14456	EUPSC	14457(OCTBI)	EUPSC,OCTBI	Lachesis_group22__46_contigs__length_104782409:82183095..82747768	564673	EUPSC_cluster_7398,EUPSC_cluster_3253,EUPSC_cluster_11689,EUPSC_cluster_7577,EUPSC_cluster_14015	PF13606 Ankyrin repeat-PF12796 Ankyrin repeats (3 copies); ; PF00856 SET domain-PF01753 MYND finger; PF12836 Helix-hairpin-helix motif-PF00400 WD domain, G-beta repeat-PF00400 WD domain, G-beta repeat-PF00400 WD domain, G-beta repeat-PF00400 WD domain, G-beta repeat-PF00400 WD domain, G-beta repeat-PF00400 WD domain, G-beta repeat-PF00400 WD domain, G-beta repeat-PF12937 F-box-like; PF03357 Snf7
13815	EUPSC	3466(OCTBI)	OCTBI,CALMI,EUPSC	Lachesis_group18__53_contigs__length_106174747:6863349..6987898	124549	EUPSC_cluster_12012,EUPSC_cluster_25295,EUPSC_cluster_6827,EUPSC_cluster_2367	PF03054 tRNA methyl transferase; PF03054 tRNA methyl transferase-PF03054 tRNA methyl transferase; PF14377 Domain of unknown function (DUF4414)-PF02825 WWE domain-PF06012 Domain of Unknown Function (DUF908)-PF06012 Domain of Unknown Function (DUF908)-PF06025 Domain of Unknown Function (DUF913)-PF00632 HECT-domain (ubiquitin-transferase); PF00076 RNA recognition motif. (a.k.a. RRM, RBD, or RNP doma…
3215	OCTBI	3214(CALMI)	CALMI,OCTBI	KQ418295:219532..318861	99329	OCTBI_Ocbimv22015829m.p,OCTBI_Ocbimv22015830m.p,OCTBI_Ocbimv22015831m.p,OCTBI_Ocbimv22015833m.p,OCTBI_Ocbimv22015834m.p,OCTBI_Ocbimv22015837m.p,OCTBI_Ocbimv22015839m.p,OCTBI_Ocbimv22015840m.p
13956	OCTBI	13955(EUPSC)	OCTBI,EUPSC	KQ416124:391539..448885	57346	OCTBI_Ocbimv22024481m.p,OCTBI_Ocbimv22024480m.p,OCTBI_Ocbimv22024483m.p,OCTBI_Ocbimv22024484m.p
3486	CALMI	3487(OCTBI)	OCTBI,CALMI	oct010304F:712..111951	111239	CALMI_Omin028291p,CALMI_Omin028290p,CALMI_Omin028289p
3387	CALMI	3388(OCTBI)	CALMI,OCTBI	oct007383F:25859..137672	111813	CALMI_Omin013845p,CALMI_Omin013844p,CALMI_Omin013843p
14483	OCTBI	14484(EUPSC)	EUPSC,OCTBI	KQ419574:776853..979573	202720	OCTBI_Ocbimv22024365m.p,OCTBI_Ocbimv22024367m.p,OCTBI_Ocbimv22024371m.p
13983	OCTBI	13984(EUPSC)	EUPSC,OCTBI	KQ421206:301078..493724	192646	OCTBI_Ocbimv22031245m.p,OCTBI_Ocbimv22031246m.p,OCTBI_Ocbimv22031247m.p,OCTBI_Ocbimv22031249m.p
3658	CALMI	3657(OCTBI)	OCTBI,CALMI	oct002110F:15337..171884	156547	CALMI_Omin006695p,CALMI_Omin006693p,CALMI_Omin006694p,CALMI_Omin006697p
14566	EUPSC	14567(OCTBI)	OCTBI,EUPSC	Lachesis_group34__47_contigs__length_76047342:52375039..52503933	128894	EUPSC_cluster_9287,EUPSC_cluster_8576,EUPSC_cluster_2967	PF15275 PEHE domain; PF00226 DnaJ domain; PF02146 Sir2 family
4299	EUPSC	4391(CALMI),4300(CALMI),4462(CALMI)	EUPSC,CALMI	Lachesis_group28__49_contigs__length_91470296:17318904..17348680	29776	EUPSC_cluster_14646,EUPSC_cluster_18022,EUPSC_cluster_18021	; ; PF00078 Reverse transcriptase (RNA-dependent DNA polymerase)
14023	EUPSC	14022(OCTBI)	EUPSC,OCTBI	Lachesis_group3__52_contigs__length_175295898:101945142..104039554	2094412	EUPSC_cluster_17080,EUPSC_cluster_94,EUPSC_cluster_13157,EUPSC_cluster_2036	PF00400 WD domain, G-beta repeat; PF00400 WD domain, G-beta repeat-PF00400 WD domain, G-beta repeat; PF00104 Ligand-binding domain of nuclear hormone receptor; PF00001 7 transmembrane receptor (rhodopsin family)
3177	CALMI	3178(OCTBI)	CALMI,OCTBI,EUPSC	oct001850F:99667..336004	236337	CALMI_Omin001107p,CALMI_Omin001104p,CALMI_Omin001105p
3303	CALMI	3302(OCTBI)	CALMI,OCTBI	oct000952F:99189..417433	318244	CALMI_Omin003347p,CALMI_Omin003349p,CALMI_Omin003348p
3774	OCTBI	3865(CALMI),3775(CALMI),14059(EUPSC)	CALMI,OCTBI,EUPSC	KQ417929:148647..297872	149225	OCTBI_Ocbimv22012713m.p,OCTBI_Ocbimv22012714m.p,OCTBI_Ocbimv22012715m.p,OCTBI_Ocbimv22012716m.p,OCTBI_Ocbimv22012718m.p,OCTBI_Ocbimv22012719m.p
3613	OCTBI	3614(CALMI)	CALMI,OCTBI	KQ418094:38767..133735	94968	OCTBI_Ocbimv22014141m.p,OCTBI_Ocbimv22014144m.p,OCTBI_Ocbimv22014146m.p
3669	OCTBI	3670(CALMI),4486(EUPSC)	EUPSC,CALMI,OCTBI	KQ418200:404642..506189	101547	OCTBI_Ocbimv22015148m.p,OCTBI_Ocbimv22015149m.p,OCTBI_Ocbimv22015150m.p,OCTBI_Ocbimv22015153m.p,OCTBI_Ocbimv22015146m.p
13858	OCTBI	13859(EUPSC)	EUPSC,OCTBI	KQ431314:23663..92983	69320	OCTBI_Ocbimv22019789m.p,OCTBI_Ocbimv22019791m.p,OCTBI_Ocbimv22019792m.p
13974	EUPSC	3189(OCTBI)	OCTBI,EUPSC	Lachesis_group25__42_contigs__length_94613958:89698250..90256125	557875	EUPSC_cluster_27196,EUPSC_cluster_1190,EUPSC_cluster_14319,EUPSC_cluster_15192,EUPSC_cluster_5980,EUPSC_cluster_436	; PF14670 Coagulation Factor Xa inhibitory site-PF13927 Immunoglobulin domain-PF13927 Immunoglobulin domain-PF13927 Immunoglobulin domain-PF13927 Immunoglobulin domain-PF13927 Immunoglobulin domain-PF12662 Complement Clr-like EGF-like-PF07679 Immunoglobulin I-set domain-PF07679 Immunoglobulin I-set domain-PF07679 Immunoglobulin I-set domain-PF07679 Immunoglobulin I-set domain-PF07679 Immunoglobul…
13852	OCTBI	13853(EUPSC)	EUPSC,OCTBI	KQ423139:715013..903329	188316	OCTBI_Ocbimv22037854m.p,OCTBI_Ocbimv22037857m.p,OCTBI_Ocbimv22037859m.p
14314	OCTBI	14313(EUPSC)	EUPSC,OCTBI	KQ417183:334666..485130	150464	OCTBI_Ocbimv22004612m.p,OCTBI_Ocbimv22004613m.p,OCTBI_Ocbimv22004614m.p
4134	EUPSC	4133(CALMI)	CALMI,EUPSC	Lachesis_group7__52_contigs__length_145002158:64769479..65020051	250572	EUPSC_cluster_4768,EUPSC_cluster_10665,EUPSC_cluster_10896,EUPSC_cluster_23936	; ; PF07690 Major Facilitator Superfamily;
4425	EUPSC	2904(CALMI),2903(OCTBI)	EUPSC,OCTBI,CALMI	Lachesis_group9__67_contigs__length_144638433:102773741..103354454	580713	EUPSC_cluster_3076,EUPSC_cluster_2359,EUPSC_cluster_26854	PF01359 Transposase (partial DDE domain)-PF06464 DMAP1-binding Domain-PF00501 AMP-binding enzyme-PF00501 AMP-binding enzyme; PF00334 Nucleoside diphosphate kinase-PF00334 Nucleoside diphosphate kinase-PF00334 Nucleoside diphosphate kinase-PF00085 Thioredoxin; PF00098 Zinc knuckle-PF00583 Acetyltransferase (GNAT) family
3183	OCTBI	3184(CALMI)	CALMI,OCTBI	KQ416721:16689..78346	61657	OCTBI_Ocbimv22038042m.p,OCTBI_Ocbimv22038043m.p,OCTBI_Ocbimv22038044m.p
2930	OCTBI	2929(CALMI)	CALMI,OCTBI	KQ421718:179352..313692	134340	OCTBI_Ocbimv22033013m.p,OCTBI_Ocbimv22033014m.p,OCTBI_Ocbimv22033016m.p
14299	OCTBI	14300(EUPSC)	EUPSC,OCTBI	KQ424459:1224708..1295704	70996	OCTBI_Ocbimv22001885m.p,OCTBI_Ocbimv22001886m.p,OCTBI_Ocbimv22001887m.p,OCTBI_Ocbimv22001888m.p
3107	OCTBI	3462(CALMI),3108(CALMI),4240(EUPSC)	EUPSC,OCTBI,CALMI	KQ417249:2430833..2586213	155380	OCTBI_Ocbimv22005409m.p,OCTBI_Ocbimv22005412m.p,OCTBI_Ocbimv22005413m.p,OCTBI_Ocbimv22005408m.p
2725	OCTBI	3242(CALMI)	OCTBI,CALMI	KQ417293:91201..397862	306661	OCTBI_Ocbimv22006060m.p,OCTBI_Ocbimv22006063m.p,OCTBI_Ocbimv22006066m.p,OCTBI_Ocbimv22006053m.p,OCTBI_Ocbimv22006054m.p,OCTBI_Ocbimv22006055m.p,OCTBI_Ocbimv22006058m.p
3704	CALMI	3703(OCTBI)	CALMI,OCTBI	oct003781F:139064..194940	55876	CALMI_Omin007532p,CALMI_Omin007533p,CALMI_Omin007531p
3241	CALMI	3240(OCTBI)	OCTBI,CALMI	oct005362F:1582..214409	212827	CALMI_Omin010946p,CALMI_Omin010944p,CALMI_Omin010945p,CALMI_Omin010947p,CALMI_Omin010948p
14122	OCTBI	14121(EUPSC)	OCTBI,EUPSC	KQ420126:383664..758622	374958	OCTBI_Ocbimv22026834m.p,OCTBI_Ocbimv22026836m.p,OCTBI_Ocbimv22026837m.p,OCTBI_Ocbimv22026838m.p,OCTBI_Ocbimv22026840m.p,OCTBI_Ocbimv22026841m.p,OCTBI_Ocbimv22026843m.p,OCTBI_Ocbimv22026844m.p
14128	OCTBI	14129(EUPSC)	EUPSC,OCTBI	KQ420270:32955..125986	93031	OCTBI_Ocbimv22027415m.p,OCTBI_Ocbimv22027416m.p,OCTBI_Ocbimv22027417m.p
3173	CALMI	3174(OCTBI)	CALMI,OCTBI,EUPSC	oct002901F:26620..182851	156231	CALMI_Omin007540p,CALMI_Omin007539p,CALMI_Omin007538p
14085	OCTBI	14086(EUPSC)	EUPSC,OCTBI	KQ417309:14791..89088	74297	OCTBI_Ocbimv22006271m.p,OCTBI_Ocbimv22006272m.p,OCTBI_Ocbimv22006273m.p
3617	OCTBI	3618(CALMI)	CALMI,OCTBI	KQ420305:23444..89329	65885	OCTBI_Ocbimv22027560m.p,OCTBI_Ocbimv22027561m.p,OCTBI_Ocbimv22027562m.p
3926	CALMI	2847(OCTBI)	CALMI,OCTBI	oct021429F:25641..66876	41235	CALMI_Omin016892p,CALMI_Omin016894p,CALMI_Omin016893p
3298	OCTBI	3299(CALMI)	CALMI,OCTBI	KQ421721:208644..300240	91596	OCTBI_Ocbimv22033043m.p,OCTBI_Ocbimv22033044m.p,OCTBI_Ocbimv22033045m.p,OCTBI_Ocbimv22033046m.p,OCTBI_Ocbimv22033047m.p
3320	OCTBI	4213(EUPSC),3319(CALMI),3192(CALMI)	CALMI,OCTBI,EUPSC	KQ418413:6388..137171	130783	OCTBI_Ocbimv22016853m.p,OCTBI_Ocbimv22016854m.p,OCTBI_Ocbimv22016855m.p,OCTBI_Ocbimv22016857m.p,OCTBI_Ocbimv22016842m.p,OCTBI_Ocbimv22016844m.p,OCTBI_Ocbimv22016849m.p
3307	OCTBI	4415(EUPSC)	CALMI,OCTBI,EUPSC	KQ416491:321676..644534	322858	OCTBI_Ocbimv22033692m.p,OCTBI_Ocbimv22033694m.p,OCTBI_Ocbimv22033695m.p,OCTBI_Ocbimv22033697m.p,OCTBI_Ocbimv22033698m.p,OCTBI_Ocbimv22033699m.p,OCTBI_Ocbimv22033700m.p,OCTBI_Ocbimv22033701m.p,OCTBI_Ocbimv22033702m.p
2593	CALMI	2594(OCTBI)	CALMI,OCTBI	oct016601F:12959..53082	40123	CALMI_Omin020477p,CALMI_Omin020476p,CALMI_Omin020478p
3571	CALMI	3572(OCTBI)	OCTBI,CALMI	oct001731F:163715..238735	75020	CALMI_Omin008767p,CALMI_Omin008768p,CALMI_Omin008766p
3834	CALMI	2883(OCTBI)	CALMI,OCTBI	oct014893F:19566..81844	62278	CALMI_Omin026321p,CALMI_Omin026323p,CALMI_Omin026322p
3406	CALMI	3405(OCTBI)	CALMI,OCTBI	oct002252F:103913..232381	128468	CALMI_Omin007623p,CALMI_Omin007626p,CALMI_Omin007622p,CALMI_Omin007624p
2612	OCTBI	2613(CALMI)	CALMI,OCTBI	KQ417763:21974..150392	128418	OCTBI_Ocbimv22011208m.p,OCTBI_Ocbimv22011209m.p,OCTBI_Ocbimv22011210m.p,OCTBI_Ocbimv22011211m.p,OCTBI_Ocbimv22011215m.p,OCTBI_Ocbimv22011217m.p
3383	OCTBI	3382(CALMI)	OCTBI,CALMI	KQ417591:678271..808340	130069	OCTBI_Ocbimv22009406m.p,OCTBI_Ocbimv22009407m.p,OCTBI_Ocbimv22009408m.p
3021	OCTBI	4340(EUPSC)	EUPSC,OCTBI,CALMI	KQ416479:555445..919224	363779	OCTBI_Ocbimv22033392m.p,OCTBI_Ocbimv22033393m.p,OCTBI_Ocbimv22033395m.p,OCTBI_Ocbimv22033398m.p,OCTBI_Ocbimv22033399m.p,OCTBI_Ocbimv22033400m.p,OCTBI_Ocbimv22033387m.p,OCTBI_Ocbimv22033388m.p,OCTBI_Ocbimv22033390m.p
14425	EUPSC	14424(OCTBI)	OCTBI,EUPSC	Lachesis_group18__53_contigs__length_106174747:74676384..75520317	843933	EUPSC_cluster_1551,EUPSC_cluster_13623,EUPSC_cluster_25456	PF00788 Ras association (RalGDS/AF-6) domain; PF13920 Zinc finger, C3HC4 type (RING finger); PF00293 NUDIX domain
13925	EUPSC	13924(OCTBI)	OCTBI,EUPSC	Lachesis_group41__39_contigs__length_54644242:29796987..30025293	228306	EUPSC_cluster_1080,EUPSC_cluster_19474,EUPSC_cluster_19473,EUPSC_cluster_14535	PF03630 Fumble; PF00617 RasGEF domain; ; PF00400 WD domain, G-beta repeat-PF00400 WD domain, G-beta repeat
1305	EUPSC	4151(CALMI)	EUPSC,CALMI	Lachesis_group31__46_contigs__length_81539927:79220579..81405782	2185203	EUPSC_cluster_2339,EUPSC_cluster_9166,EUPSC_cluster_39,EUPSC_cluster_716,EUPSC_cluster_10257,EUPSC_cluster_9796,EUPSC_cluster_27215,EUPSC_cluster_27214,EUPSC_cluster_23318,EUPSC_cluster_870,EUPSC_cluster_27212,EUPSC_cluster_2011	PF03223 V-ATPase subunit C; ; PF14580 Leucine-rich repeat; ; ; PF01477 PLAT/LH2 domain-PF01477 PLAT/LH2 domain-PF01477 PLAT/LH2 domain-PF01477 PLAT/LH2 domain; PF01477 PLAT/LH2 domain-PF01477 PLAT/LH2 domain; ; PF01477 PLAT/LH2 domain-PF01477 PLAT/LH2 domain-PF01477 PLAT/LH2 domain-PF01477 PLAT/LH2 domain-PF01477 PLAT/LH2 domain-PF01477 PLAT/LH2 domain-PF01477 PLAT/LH2 domain; ; PF00621 RhoGEF do…
13888	OCTBI	13889(EUPSC)	EUPSC,OCTBI	KQ418587:668845..900133	231288	OCTBI_Ocbimv22018256m.p,OCTBI_Ocbimv22018258m.p,OCTBI_Ocbimv22018259m.p,OCTBI_Ocbimv22018260m.p
14244	EUPSC	14245(OCTBI)	EUPSC,OCTBI	Lachesis_group20__56_contigs__length_105542877:20828474..21192546	364072	EUPSC_cluster_6407,EUPSC_cluster_3192,EUPSC_cluster_19713,EUPSC_cluster_6522,EUPSC_cluster_554	; PF17177 Pentacotripeptide-repeat region of PRORP; ; PF00531 Death domain-PF16739 Caspase recruitment domain; PF03820 Tricarboxylate carrier
2950	OCTBI	2951(CALMI),3864(CALMI)	CALMI,OCTBI,EUPSC	KQ423141:27715..97807	70092	OCTBI_Ocbimv22037860m.p,OCTBI_Ocbimv22037861m.p,OCTBI_Ocbimv22037862m.p,OCTBI_Ocbimv22037867m.p
13882	OCTBI	13883(EUPSC)	OCTBI,EUPSC	KQ421451:15692..224330	208638	OCTBI_Ocbimv22032105m.p,OCTBI_Ocbimv22032106m.p,OCTBI_Ocbimv22032112m.p
4240	EUPSC	3108(CALMI),3462(CALMI),3107(OCTBI)	EUPSC,OCTBI,CALMI	Lachesis_group0__68_contigs__length_203855924:89776700..90576311	799611	EUPSC_cluster_3913,EUPSC_cluster_3976,EUPSC_cluster_16549,EUPSC_cluster_16548,EUPSC_cluster_7173	PF00095 WAP-type (Whey Acidic Protein) 'four-disulfide core'-PF05375 Pacifastin inhibitor (LCMII); PF00096 Zinc finger, C2H2 type-PF00096 Zinc finger, C2H2 type-PF00096 Zinc finger, C2H2 type; ; ; PF00650 CRAL/TRIO domain-PF01105 emp24/gp25L/p24 family/GOLD
4428	EUPSC	3626(OCTBI),3627(CALMI)	OCTBI,CALMI,EUPSC	Lachesis_group14__44_contigs__length_129294686:60769443..60825403	55960	EUPSC_cluster_2729,EUPSC_cluster_15998,EUPSC_cluster_12248	; PF14050 N-terminal conserved domain of Nudc.; PF05856 ARP2/3 complex 20 kDa subunit (ARPC4)
2517	CALMI	2516(OCTBI)	OCTBI,CALMI	oct007752F:20187..156058	135871	CALMI_Omin012937p,CALMI_Omin012935p,CALMI_Omin012938p,CALMI_Omin012939p,CALMI_Omin012936p
2890	CALMI	2889(OCTBI)	CALMI,OCTBI	oct002813F:1037..136093	135056	CALMI_Omin000514p,CALMI_Omin000515p,CALMI_Omin000518p,CALMI_Omin000519p,CALMI_Omin000513p
3512	OCTBI	3513(CALMI),4483(EUPSC)	EUPSC,OCTBI,CALMI	KQ416136:773143..1038325	265182	OCTBI_Ocbimv22025045m.p,OCTBI_Ocbimv22025049m.p,OCTBI_Ocbimv22025050m.p,OCTBI_Ocbimv22025052m.p,OCTBI_Ocbimv22025055m.p,OCTBI_Ocbimv22025057m.p
14017	OCTBI	14018(EUPSC)	EUPSC,OCTBI	KQ417921:11163..75960	64797	OCTBI_Ocbimv22012602m.p,OCTBI_Ocbimv22012604m.p,OCTBI_Ocbimv22012605m.p
2728	OCTBI	14163(EUPSC),2727(CALMI)	OCTBI,CALMI,EUPSC	KQ417715:61981..312486	250505	OCTBI_Ocbimv22010796m.p,OCTBI_Ocbimv22010797m.p,OCTBI_Ocbimv22010799m.p,OCTBI_Ocbimv22010801m.p,OCTBI_Ocbimv22010802m.p
14514	OCTBI	14515(EUPSC)	OCTBI,EUPSC	KQ420642:172536..254599	82063	OCTBI_Ocbimv22029080m.p,OCTBI_Ocbimv22029081m.p,OCTBI_Ocbimv22029082m.p
4154	EUPSC	2951(CALMI)	OCTBI,CALMI,EUPSC	Lachesis_group34__47_contigs__length_76047342:36894006..37062756	168750	EUPSC_cluster_8387,EUPSC_cluster_27914,EUPSC_cluster_8615,EUPSC_cluster_27916	PF05739 SNARE domain-PF00804 Syntaxin; ; PF00069 Protein kinase domain-PF14970 Domain of unknown function (DUF4509); PF14970 Domain of unknown function (DUF4509)
14251	OCTBI	14250(EUPSC)	EUPSC,OCTBI	KQ419463:9791..58228	48437	OCTBI_Ocbimv22023712m.p,OCTBI_Ocbimv22023713m.p,OCTBI_Ocbimv22023714m.p
13879	EUPSC	3674(OCTBI)	EUPSC,CALMI,OCTBI	Lachesis_group38__38_contigs__length_61810156:43176994..43640151	463157	EUPSC_cluster_11594,EUPSC_cluster_12822,EUPSC_cluster_9860,EUPSC_cluster_13786	PF00025 ADP-ribosylation factor family-PF00025 ADP-ribosylation factor family; PF02252 Proteasome activator pa28 beta subunit-PF02251 Proteasome activator pa28 alpha subunit; PF12038 Domain of unknown function (DUF3524)-PF00534 Glycosyl transferases group 1; PF07942 N2227-like protein
4354	EUPSC	3390(CALMI),3389(OCTBI)	EUPSC,OCTBI,CALMI	Lachesis_group31__46_contigs__length_81539927:47212839..47812342	599503	EUPSC_cluster_5710,EUPSC_cluster_22509,EUPSC_cluster_22508,EUPSC_cluster_22507,EUPSC_cluster_10722,EUPSC_cluster_9344,EUPSC_cluster_22506,EUPSC_cluster_7928	PF12796 Ankyrin repeats (3 copies)-PF13637 Ankyrin repeats (many copies)-PF07525 SOCS box; PF17207 MCM OB domain; PF00493 MCM2/3/5 family; PF14924 Protein of unknown function (DUF4497); PF00493 MCM2/3/5 family-PF00493 MCM2/3/5 family; PF02617 ATP-dependent Clp protease adaptor protein ClpS-PF02207 Putative zinc finger in N-recognin (UBR box); ;
14055	OCTBI	14056(EUPSC)	EUPSC,OCTBI	KQ427941:21290..163936	142646	OCTBI_Ocbimv22011863m.p,OCTBI_Ocbimv22011867m.p,OCTBI_Ocbimv22011871m.p
3295	CALMI	3294(OCTBI)	OCTBI,CALMI	oct001638F:18073..364544	346471	CALMI_Omin006104p,CALMI_Omin006105p,CALMI_Omin006110p,CALMI_Omin006112p,CALMI_Omin006109p,CALMI_Omin006113p
14113	EUPSC	14112(OCTBI)	EUPSC,OCTBI	Lachesis_group3__52_contigs__length_175295898:37924767..38541530	616763	EUPSC_cluster_11748,EUPSC_cluster_550,EUPSC_cluster_549,EUPSC_cluster_7201	PF00090 Thrombospondin type 1 domain-PF00090 Thrombospondin type 1 domain-PF00090 Thrombospondin type 1 domain-PF00090 Thrombospondin type 1 domain-PF08686 PLAC (protease and lacunin) domain; ; PF00654 Voltage gated chloride channel; PF03810 Importin-beta N-terminal domain
13788	OCTBI	4491(EUPSC)	EUPSC,CALMI,OCTBI	KQ433876:4868..128910	124042	OCTBI_Ocbimv22024237m.p,OCTBI_Ocbimv22024239m.p,OCTBI_Ocbimv22024242m.p
2495	CALMI	2496(OCTBI)	OCTBI,CALMI	oct000530F:483893..658233	174340	CALMI_Omin005350p,CALMI_Omin005347p,CALMI_Omin005351p,CALMI_Omin005348p
1889	CALMI	2590(OCTBI)	CALMI,OCTBI	oct000075F:16465..1188871	1172406	CALMI_Omin001491p,CALMI_Omin001498p,CALMI_Omin001490p,CALMI_Omin001501p,CALMI_Omin001500p,CALMI_Omin001497p,CALMI_Omin001494p,CALMI_Omin001493p,CALMI_Omin001499p,CALMI_Omin001496p,CALMI_Omin001495p,CALMI_Omin001502p,CALMI_Omin001492p,CALMI_Omin001489p
3818	OCTBI	3817(CALMI)	CALMI,OCTBI	KQ415995:98417..154812	56395	OCTBI_Ocbimv22018535m.p,OCTBI_Ocbimv22018537m.p,OCTBI_Ocbimv22018538m.p,OCTBI_Ocbimv22018539m.p,OCTBI_Ocbimv22018540m.p
14508	OCTBI	14507(EUPSC)	EUPSC,OCTBI	KQ430417:254989..294334	39345	OCTBI_Ocbimv22017696m.p,OCTBI_Ocbimv22017698m.p,OCTBI_Ocbimv22017700m.p,OCTBI_Ocbimv22017701m.p
14502	EUPSC	14503(OCTBI)	OCTBI,EUPSC	Lachesis_group21__43_contigs__length_103963499:78801051..79558407	757356	EUPSC_cluster_3392,EUPSC_cluster_23270,EUPSC_cluster_6284,EUPSC_cluster_13947	PF00566 Rab-GTPase-TBC domain-PF15733 Domain of unknown function (DUF4682); PF00179 Ubiquitin-conjugating enzyme; ; PF02877 Poly(ADP-ribose) polymerase, regulatory domain-PF05406 WGR domain-PF00644 Poly(ADP-ribose) polymerase catalytic domain-PF02825 WWE domain-PF02825 WWE domain
14283	EUPSC	3032(OCTBI)	EUPSC,CALMI,OCTBI	Lachesis_group24__36_contigs__length_98752639:97552884..98137060	584176	EUPSC_cluster_19877,EUPSC_cluster_6868,EUPSC_cluster_8130,EUPSC_cluster_11701,EUPSC_cluster_8129	PF16087 Domain of unknown function (DUF4817); PF07690 Major Facilitator Superfamily-PF07690 Major Facilitator Superfamily; ; PF09728 Myosin-like coiled-coil protein; PF01710 Transposase
3033	CALMI	3032(OCTBI)	CALMI,OCTBI,EUPSC	oct002064F:690..379973	379283	CALMI_Omin000342p,CALMI_Omin000343p,CALMI_Omin000344p
2829	CALMI	2830(OCTBI)	OCTBI,CALMI	oct001689F:286815..406792	119977	CALMI_Omin000357p,CALMI_Omin000358p,CALMI_Omin000355p
3689	OCTBI	3688(CALMI)	CALMI,OCTBI	KQ422016:240049..364393	124344	OCTBI_Ocbimv22034338m.p,OCTBI_Ocbimv22034340m.p,OCTBI_Ocbimv22034342m.p,OCTBI_Ocbimv22034343m.p,OCTBI_Ocbimv22034345m.p,OCTBI_Ocbimv22034349m.p
3466	OCTBI	13815(EUPSC),3465(CALMI)	EUPSC,CALMI,OCTBI	KQ418370:104718..293224	188506	OCTBI_Ocbimv22016606m.p,OCTBI_Ocbimv22016608m.p,OCTBI_Ocbimv22016610m.p,OCTBI_Ocbimv22016611m.p,OCTBI_Ocbimv22016613m.p,OCTBI_Ocbimv22016617m.p
4353	EUPSC	2706(OCTBI),2707(CALMI)	EUPSC,CALMI,OCTBI	Lachesis_group14__44_contigs__length_129294686:46376670..47082076	705406	EUPSC_cluster_2308,EUPSC_cluster_19235,EUPSC_cluster_19239,EUPSC_cluster_19241,EUPSC_cluster_4805	PF00076 RNA recognition motif. (a.k.a. RRM, RBD, or RNP domain)-PF01585 G-patch domain; PF07690 Major Facilitator Superfamily; PF07690 Major Facilitator Superfamily; PF00089 Trypsin; PF00782 Dual specificity phosphatase, catalytic domain
3367	CALMI	3368(OCTBI)	CALMI,OCTBI	oct008956F:65944..118144	52200	CALMI_Omin012997p,CALMI_Omin012996p,CALMI_Omin012998p
2650	OCTBI	2651(CALMI)	OCTBI,CALMI	KQ418310:66244..119022	52778	OCTBI_Ocbimv22016010m.p,OCTBI_Ocbimv22016011m.p,OCTBI_Ocbimv22016012m.p
2526	CALMI	2527(OCTBI)	OCTBI,CALMI,EUPSC	oct004686F:395..157675	157280	CALMI_Omin001473p,CALMI_Omin001476p,CALMI_Omin001474p,CALMI_Omin001475p
3530	OCTBI	3531(CALMI)	OCTBI,CALMI	KQ425516:135237..206912	71675	OCTBI_Ocbimv22005075m.p,OCTBI_Ocbimv22005076m.p,OCTBI_Ocbimv22005078m.p,OCTBI_Ocbimv22005079m.p
4153	EUPSC	3366(CALMI),3365(OCTBI)	EUPSC,CALMI,OCTBI	Lachesis_group7__52_contigs__length_145002158:85513447..85894188	380741	EUPSC_cluster_1678,EUPSC_cluster_5352,EUPSC_cluster_4154,EUPSC_cluster_10011,EUPSC_cluster_10528	PF00400 WD domain, G-beta repeat-PF00400 WD domain, G-beta repeat; PF00398 Ribosomal RNA adenine dimethylase; PF00078 Reverse transcriptase (RNA-dependent DNA polymerase)-PF02535 ZIP Zinc transporter; ; PF12937 F-box-like
2981	OCTBI	2980(CALMI)	OCTBI,CALMI	KQ425980:3811..87864	84053	OCTBI_Ocbimv22006517m.p,OCTBI_Ocbimv22006518m.p,OCTBI_Ocbimv22006519m.p,OCTBI_Ocbimv22006520m.p,OCTBI_Ocbimv22006521m.p,OCTBI_Ocbimv22006522m.p
4264	EUPSC	2576(OCTBI),2575(CALMI)	EUPSC,OCTBI,CALMI	Lachesis_group10__55_contigs__length_138218214:80453755..81104088	650333	EUPSC_cluster_9419,EUPSC_cluster_2526,EUPSC_cluster_6971,EUPSC_cluster_6970,EUPSC_cluster_473,EUPSC_cluster_472,EUPSC_cluster_157	PF00850 Histone deacetylase domain; ; PF01432 Peptidase family M3; PF01432 Peptidase family M3; PF00439 Bromodomain-PF00004 ATPase family associated with various cellular activities (AAA)-PF00004 ATPase family associated with various cellular activities (AAA); PF00004 ATPase family associated with various cellular activities (AAA)-PF00004 ATPase family associated with various cellular activities …
14234	EUPSC	14233(OCTBI)	OCTBI,EUPSC	Lachesis_group23__35_contigs__length_97660015:24139091..25028619	889528	EUPSC_cluster_2009,EUPSC_cluster_369,EUPSC_cluster_1706,EUPSC_cluster_15930,EUPSC_cluster_21696	PF00069 Protein kinase domain; PF02826 D-isomer specific 2-hydroxyacid dehydrogenase, NAD binding domain; PF00179 Ubiquitin-conjugating enzyme; PF10186 Vacuolar sorting 38 and autophagy-related subunit 14;
3694	CALMI	3695(OCTBI)	CALMI,OCTBI,EUPSC	oct005965F:12854..133188	120334	CALMI_Omin014669p,CALMI_Omin014671p,CALMI_Omin014670p
14111	OCTBI	14110(EUPSC)	OCTBI,EUPSC	KQ427973:30909..190645	159736	OCTBI_Ocbimv22012019m.p,OCTBI_Ocbimv22012021m.p,OCTBI_Ocbimv22012022m.p,OCTBI_Ocbimv22012023m.p
3815	CALMI	4302(EUPSC),3816(OCTBI)	CALMI,OCTBI,EUPSC	oct007487F:3369..174966	171597	CALMI_Omin011789p,CALMI_Omin011790p,CALMI_Omin011791p,CALMI_Omin011788p
2772	OCTBI	14063(EUPSC),2773(CALMI)	CALMI,OCTBI,EUPSC	KQ419801:282..195459	195177	OCTBI_Ocbimv22025440m.p,OCTBI_Ocbimv22025441m.p,OCTBI_Ocbimv22025442m.p,OCTBI_Ocbimv22025435m.p,OCTBI_Ocbimv22025437m.p,OCTBI_Ocbimv22025439m.p
2630	OCTBI	2629(CALMI),14146(EUPSC)	CALMI,OCTBI,EUPSC	KQ425021:276075..418536	142461	OCTBI_Ocbimv22003522m.p,OCTBI_Ocbimv22003523m.p,OCTBI_Ocbimv22003525m.p,OCTBI_Ocbimv22003526m.p
14395	EUPSC	14396(OCTBI)	EUPSC,OCTBI	Lachesis_group43__26_contigs__length_23511657:16685873..16827682	141809	EUPSC_cluster_14035,EUPSC_cluster_5500,EUPSC_cluster_24675	PF00149 Calcineurin-like phosphoesterase; PF16050 Paf1 complex subunit CDC73 N-terminal-PF05179 RNA pol II accessory factor, Cdc73 family, C-terminal; PF01753 MYND finger-PF13392 HNH endonuclease
4277	EUPSC	3804(CALMI),3803(OCTBI)	CALMI,OCTBI,EUPSC	Lachesis_group8__53_contigs__length_148332072:92115825..92344515	228690	EUPSC_cluster_7114,EUPSC_cluster_6344,EUPSC_cluster_2094	PF00017 SH2 domain-PF00017 SH2 domain-PF00168 C2 domain-PF00169 PH domain-PF00616 GTPase-activator protein for Ras-like GTPase; PF01359 Transposase (partial DDE domain)-PF00400 WD domain, G-beta repeat-PF00400 WD domain, G-beta repeat; PF14295 PAN domain-PF00090 Thrombospondin type 1 domain-PF01562 Reprolysin family propeptide-PF00024 PAN domain-PF01421 Reprolysin (M12B) family zinc metalloprotea…
3199	OCTBI	3200(CALMI)	OCTBI,CALMI	KQ416383:11177..224165	212988	OCTBI_Ocbimv22031062m.p,OCTBI_Ocbimv22031063m.p,OCTBI_Ocbimv22031064m.p,OCTBI_Ocbimv22031065m.p,OCTBI_Ocbimv22031066m.p
14302	EUPSC	14301(OCTBI)	EUPSC,OCTBI	Lachesis_group5__70_contigs__length_158228327:35255212..35783479	528267	EUPSC_cluster_23342,EUPSC_cluster_5126,EUPSC_cluster_23341,EUPSC_cluster_9964,EUPSC_cluster_23339,EUPSC_cluster_23334	; ; PF00505 HMG (high mobility group) box; PF05997 Nucleolar protein,Nop52; PF00118 TCP-1/cpn60 chaperonin family-PF00118 TCP-1/cpn60 chaperonin family; PF00096 Zinc finger, C2H2 type
6888	EUPSC	14151(OCTBI)	EUPSC,OCTBI	Lachesis_group34__47_contigs__length_76047342:22065192..22508069	442877	EUPSC_cluster_2088,EUPSC_cluster_16913,EUPSC_cluster_16912,EUPSC_cluster_897,EUPSC_cluster_10628,EUPSC_cluster_16915,EUPSC_cluster_16911,EUPSC_cluster_6999	PF16350 FAD dependent oxidoreductase central domain-PF01571 Aminomethyltransferase folate-binding domain-PF01266 FAD dependent oxidoreductase-PF08669 Glycine cleavage T-protein C-terminal barrel domain; PF08669 Glycine cleavage T-protein C-terminal barrel domain; PF01266 FAD dependent oxidoreductase; PF06094 Gamma-glutamyl cyclotransferase, AIG2-like; PF06094 Gamma-glutamyl cyclotransferase, AIG2…
14308	OCTBI	14309(EUPSC)	EUPSC,OCTBI	KQ416508:517758..591157	73399	OCTBI_Ocbimv22034049m.p,OCTBI_Ocbimv22034050m.p,OCTBI_Ocbimv22034052m.p
3174	OCTBI	3173(CALMI),4339(EUPSC)	CALMI,OCTBI,EUPSC	KQ415849:26994..316331	289337	OCTBI_Ocbimv22008001m.p,OCTBI_Ocbimv22008003m.p,OCTBI_Ocbimv22008004m.p,OCTBI_Ocbimv22008005m.p,OCTBI_Ocbimv22008007m.p,OCTBI_Ocbimv22008011m.p,OCTBI_Ocbimv22008014m.p,OCTBI_Ocbimv22008015m.p
3777	CALMI	3776(OCTBI),4432(EUPSC)	OCTBI,CALMI,EUPSC	oct000184F:680822..918571	237749	CALMI_Omin000974p,CALMI_Omin000971p,CALMI_Omin000975p,CALMI_Omin000970p,CALMI_Omin000976p
2594	OCTBI	2593(CALMI)	OCTBI,CALMI	KQ423834:56345..124837	68492	OCTBI_Ocbimv22000041m.p,OCTBI_Ocbimv22000042m.p,OCTBI_Ocbimv22000043m.p,OCTBI_Ocbimv22000044m.p,OCTBI_Ocbimv22000045m.p,OCTBI_Ocbimv22000047m.p
3833	OCTBI	3392(CALMI)	OCTBI,CALMI	KQ417459:42867..649022	606155	OCTBI_Ocbimv22007903m.p,OCTBI_Ocbimv22007905m.p,OCTBI_Ocbimv22007906m.p,OCTBI_Ocbimv22007901m.p,OCTBI_Ocbimv22007908m.p,OCTBI_Ocbimv22007910m.p,OCTBI_Ocbimv22007911m.p,OCTBI_Ocbimv22007912m.p,OCTBI_Ocbimv22007913m.p,OCTBI_Ocbimv22007914m.p,OCTBI_Ocbimv22007915m.p,OCTBI_Ocbimv22007917m.p,OCTBI_Ocbimv22007919m.p,OCTBI_Ocbimv22007921m.p,OCTBI_Ocbimv22007924m.p
2589	OCTBI	2588(CALMI),4343(EUPSC)	EUPSC,CALMI,OCTBI	KQ416370:92471..416682	324211	OCTBI_Ocbimv22030794m.p,OCTBI_Ocbimv22030797m.p,OCTBI_Ocbimv22030799m.p,OCTBI_Ocbimv22030800m.p,OCTBI_Ocbimv22030801m.p,OCTBI_Ocbimv22030792m.p
2782	OCTBI	3605(CALMI),2783(CALMI)	EUPSC,CALMI,OCTBI	KQ418496:32032..329569	297537	OCTBI_Ocbimv22017435m.p,OCTBI_Ocbimv22017436m.p,OCTBI_Ocbimv22017437m.p,OCTBI_Ocbimv22017439m.p,OCTBI_Ocbimv22017440m.p,OCTBI_Ocbimv22017441m.p
3703	OCTBI	3704(CALMI)	OCTBI,CALMI	KQ423548:46280..79380	33100	OCTBI_Ocbimv22039136m.p,OCTBI_Ocbimv22039137m.p,OCTBI_Ocbimv22039138m.p
3787	CALMI	3664(OCTBI),3788(OCTBI),4492(EUPSC)	OCTBI,CALMI,EUPSC	oct001016F:184917..349025	164108	CALMI_Omin003336p,CALMI_Omin003340p,CALMI_Omin003339p,CALMI_Omin003344p,CALMI_Omin003345p,CALMI_Omin003337p
3550	OCTBI	3549(CALMI)	OCTBI,CALMI	KQ416777:212796..266452	53656	OCTBI_Ocbimv22039009m.p,OCTBI_Ocbimv22039010m.p,OCTBI_Ocbimv22039011m.p
14290	EUPSC	2581(OCTBI)	EUPSC,OCTBI,CALMI	Lachesis_group21__43_contigs__length_103963499:71572218..74282286	2710068	EUPSC_cluster_24666,EUPSC_cluster_24667,EUPSC_cluster_24668,EUPSC_cluster_9099,EUPSC_cluster_13379,EUPSC_cluster_3047,EUPSC_cluster_6408,EUPSC_cluster_1197,EUPSC_cluster_14095,EUPSC_cluster_7932	PF00042 Globin; PF00042 Globin; ; PF03137 Organic Anion Transporter Polypeptide (OATP) family-PF03137 Organic Anion Transporter Polypeptide (OATP) family-PF03137 Organic Anion Transporter Polypeptide (OATP) family; PF07648 Kazal-type serine protease inhibitor domain-PF03137 Organic Anion Transporter Polypeptide (OATP) family; PF04587 ADP-specific Phosphofructokinase/Glucokinase conserved region; …
3449	OCTBI	4439(EUPSC),3448(CALMI)	CALMI,OCTBI,EUPSC	KQ420696:7570..281799	274229	OCTBI_Ocbimv22029266m.p,OCTBI_Ocbimv22029267m.p,OCTBI_Ocbimv22029268m.p,OCTBI_Ocbimv22029269m.p,OCTBI_Ocbimv22029264m.p
3626	OCTBI	4428(EUPSC),9049(EUPSC),3627(CALMI)	EUPSC,CALMI,OCTBI	KQ431294:7999..319738	311739	OCTBI_Ocbimv22019748m.p,OCTBI_Ocbimv22019749m.p,OCTBI_Ocbimv22019751m.p,OCTBI_Ocbimv22019752m.p,OCTBI_Ocbimv22019753m.p,OCTBI_Ocbimv22019746m.p
4482	EUPSC	3586(OCTBI),3585(CALMI)	EUPSC,OCTBI,CALMI	Lachesis_group5__70_contigs__length_158228327:32823902..33400680	576778	EUPSC_cluster_5832,EUPSC_cluster_16067,EUPSC_cluster_5695,EUPSC_cluster_23353	PF09736 Pre-mRNA-splicing factor of RES complex; PF02845 CUE domain; PF00474 Sodium:solute symporter family;
2886	CALMI	4230(EUPSC),2887(OCTBI)	EUPSC,CALMI,OCTBI	oct003011F:204756..253591	48835	CALMI_Omin006700p,CALMI_Omin006698p,CALMI_Omin006699p,CALMI_Omin006701p
4133	CALMI	4134(EUPSC)	EUPSC,CALMI	oct000329F:452280..633737	181457	CALMI_Omin004280p,CALMI_Omin004281p,CALMI_Omin004284p
3917	OCTBI	4312(EUPSC),3918(CALMI)	CALMI,OCTBI,EUPSC	KQ424302:126553..328119	201566	OCTBI_Ocbimv22001412m.p,OCTBI_Ocbimv22001413m.p,OCTBI_Ocbimv22001414m.p,OCTBI_Ocbimv22001416m.p
14286	OCTBI	14086(EUPSC)	EUPSC,OCTBI	KQ418169:40495..139708	99213	OCTBI_Ocbimv22014711m.p,OCTBI_Ocbimv22014712m.p,OCTBI_Ocbimv22014713m.p
3184	CALMI	3183(OCTBI)	CALMI,OCTBI	oct004401F:24801..111487	86686	CALMI_Omin004745p,CALMI_Omin004746p,CALMI_Omin004744p
3410	CALMI	2525(OCTBI)	CALMI,OCTBI	oct023165F:3599..57097	53498	CALMI_Omin023432p,CALMI_Omin023431p,CALMI_Omin023433p
3841	OCTBI	3840(CALMI)	CALMI,OCTBI	KQ421721:578045..913735	335690	OCTBI_Ocbimv22033054m.p,OCTBI_Ocbimv22033057m.p,OCTBI_Ocbimv22033059m.p,OCTBI_Ocbimv22033060m.p,OCTBI_Ocbimv22033062m.p,OCTBI_Ocbimv22033063m.p,OCTBI_Ocbimv22033064m.p,OCTBI_Ocbimv22033065m.p,OCTBI_Ocbimv22033066m.p,OCTBI_Ocbimv22033069m.p,OCTBI_Ocbimv22033070m.p,OCTBI_Ocbimv22033068m.p
14451	OCTBI	14452(EUPSC)	EUPSC,OCTBI	KQ419098:231995..977835	745840	OCTBI_Ocbimv22021770m.p,OCTBI_Ocbimv22021772m.p,OCTBI_Ocbimv22021775m.p,OCTBI_Ocbimv22021776m.p
6842	EUPSC	11080(OCTBI)	EUPSC,OCTBI	Lachesis_group3__52_contigs__length_175295898:35664760..36270509	605749	EUPSC_cluster_22744,EUPSC_cluster_3558,EUPSC_cluster_22745,EUPSC_cluster_8392,EUPSC_cluster_10388,EUPSC_cluster_22743,EUPSC_cluster_10955	PF06017 Unconventional myosin tail, actin- and lipid-binding-PF00063 Myosin head (motor domain); PF00063 Myosin head (motor domain)-PF06017 Unconventional myosin tail, actin- and lipid-binding-PF14604 Variant SH3 domain; PF00063 Myosin head (motor domain)-PF00063 Myosin head (motor domain); PF05649 Peptidase family M13-PF05649 Peptidase family M13; PF05649 Peptidase family M13-PF01431 Peptidase f…
13951	OCTBI	13950(EUPSC)	OCTBI,EUPSC	KQ417796:411023..713683	302660	OCTBI_Ocbimv22011500m.p,OCTBI_Ocbimv22011505m.p,OCTBI_Ocbimv22011507m.p,OCTBI_Ocbimv22011512m.p
2736	OCTBI	2737(CALMI)	CALMI,OCTBI	KQ420714:2287..176895	174608	OCTBI_Ocbimv22029342m.p,OCTBI_Ocbimv22029343m.p,OCTBI_Ocbimv22029346m.p,OCTBI_Ocbimv22029347m.p,OCTBI_Ocbimv22029348m.p
3614	CALMI	3613(OCTBI)	OCTBI,CALMI	oct006956F:14753..127449	112696	CALMI_Omin013645p,CALMI_Omin013643p,CALMI_Omin013644p
3304	OCTBI	9037(EUPSC)	OCTBI,EUPSC	KQ423910:36129..528921	492792	OCTBI_Ocbimv22000276m.p,OCTBI_Ocbimv22000277m.p,OCTBI_Ocbimv22000278m.p,OCTBI_Ocbimv22000273m.p,OCTBI_Ocbimv22000274m.p,OCTBI_Ocbimv22000262m.p,OCTBI_Ocbimv22000266m.p,OCTBI_Ocbimv22000267m.p,OCTBI_Ocbimv22000268m.p,OCTBI_Ocbimv22000269m.p,OCTBI_Ocbimv22000270m.p
3773	OCTBI	3772(CALMI),14530(EUPSC)	EUPSC,CALMI,OCTBI	KQ421018:43754..160465	116711	OCTBI_Ocbimv22030538m.p,OCTBI_Ocbimv22030539m.p,OCTBI_Ocbimv22030541m.p,OCTBI_Ocbimv22030542m.p,OCTBI_Ocbimv22030543m.p
3057	CALMI	3058(OCTBI)	OCTBI,CALMI	oct003684F:22655..174772	152117	CALMI_Omin008319p,CALMI_Omin008322p,CALMI_Omin008320p,CALMI_Omin008321p
2791	CALMI	2790(OCTBI)	EUPSC,OCTBI,CALMI	oct009806F:302..69520	69218	CALMI_Omin014041p,CALMI_Omin014043p,CALMI_Omin014042p
4436	EUPSC	4437(CALMI)	EUPSC,CALMI	Lachesis_group8__53_contigs__length_148332072:131480680..131870654	389974	EUPSC_cluster_5204,EUPSC_cluster_2838,EUPSC_cluster_3000	PF02782 FGGY family of carbohydrate kinases, C-terminal domain-PF00370 FGGY family of carbohydrate kinases, N-terminal domain-PF00370 FGGY family of carbohydrate kinases, N-terminal domain; PF03828 Cid1 family poly A polymerase-PF04851 Type III restriction enzyme, res subunit-PF09416 RNA helicase (UPF2 interacting domain)-PF13086 AAA domain-PF13087 AAA domain; PF00995 Sec1 family-PF00995 Sec1 fam…
4491	EUPSC	4490(CALMI),13788(OCTBI)	CALMI,OCTBI,EUPSC	Lachesis_group0__68_contigs__length_203855924:160949771..162642279	1692508	EUPSC_cluster_3496,EUPSC_cluster_25680,EUPSC_cluster_6135,EUPSC_cluster_644	PF06979 Assembly, mitochondrial proton-transport ATP synth complex; PF11357 Cell cycle regulatory protein; ; PF05978 Ion channel regulatory protein UNC-93
2509	OCTBI	2508(CALMI)	CALMI,OCTBI	KQ428057:29929..56623	26694	OCTBI_Ocbimv22012169m.p,OCTBI_Ocbimv22012170m.p,OCTBI_Ocbimv22012171m.p
4141	EUPSC	4142(CALMI),14239(OCTBI)	OCTBI,CALMI,EUPSC	Lachesis_group32__40_contigs__length_78634074:51300362..52280139	979777	EUPSC_cluster_22049,EUPSC_cluster_22048,EUPSC_cluster_1811,EUPSC_cluster_22050,EUPSC_cluster_4096,EUPSC_cluster_7491	PF00704 Glycosyl hydrolases family 18; PF01607 Chitin binding Peritrophin-A domain-PF00704 Glycosyl hydrolases family 18; PF01663 Type I phosphodiesterase / nucleotide pyrophosphatase; PF00078 Reverse transcriptase (RNA-dependent DNA polymerase)-PF00338 Ribosomal protein S10p/S20e; PF00338 Ribosomal protein S10p/S20e;
14444	OCTBI	14443(EUPSC)	EUPSC,OCTBI	KQ416544:217284..314372	97088	OCTBI_Ocbimv22034656m.p,OCTBI_Ocbimv22034658m.p,OCTBI_Ocbimv22034659m.p,OCTBI_Ocbimv22034660m.p
2702	OCTBI	2703(CALMI)	CALMI,OCTBI	KQ422920:311752..563657	251905	OCTBI_Ocbimv22037095m.p,OCTBI_Ocbimv22037096m.p,OCTBI_Ocbimv22037098m.p
13944	EUPSC	13945(OCTBI)	OCTBI,EUPSC	Lachesis_group10__55_contigs__length_138218214:117876789..119454313	1577524	EUPSC_cluster_7941,EUPSC_cluster_13160,EUPSC_cluster_6684	PF00041 Fibronectin type III domain-PF00041 Fibronectin type III domain-PF00041 Fibronectin type III domain-PF00041 Fibronectin type III domain-PF00041 Fibronectin type III domain-PF00041 Fibronectin type III domain; PF01094 Receptor family ligand binding region-PF10613 Ligated ion channel L-glutamate- and glycine-binding site-PF00060 Ligand-gated ion channel-PF10562 Calmodulin-binding domain C0 …
4207	EUPSC	4509(CALMI),4206(CALMI),4266(CALMI)	CALMI,EUPSC	Lachesis_group26__46_contigs__length_93059273:30850976..31345394	494418	EUPSC_cluster_25978,EUPSC_cluster_25980,EUPSC_cluster_21622,EUPSC_cluster_8756	; ; PF01359 Transposase (partial DDE domain); PF07679 Immunoglobulin I-set domain
4398	CALMI	4399(EUPSC)	EUPSC,CALMI,OCTBI	oct002050F:43440..357523	314083	CALMI_Omin000807p,CALMI_Omin000804p,CALMI_Omin000803p
3104	CALMI	3103(OCTBI)	EUPSC,OCTBI,CALMI	oct011302F:25157..96252	71095	CALMI_Omin028413p,CALMI_Omin028412p,CALMI_Omin028414p
3234	OCTBI	4459(EUPSC),3235(CALMI)	CALMI,OCTBI,EUPSC	KQ425162:2969..40818	37849	OCTBI_Ocbimv22003970m.p,OCTBI_Ocbimv22003972m.p,OCTBI_Ocbimv22003973m.p
2748	CALMI	2747(OCTBI)	OCTBI,CALMI	oct007194F:58456..155699	97243	CALMI_Omin014882p,CALMI_Omin014886p,CALMI_Omin014883p,CALMI_Omin014884p
11951	OCTBI	14034(EUPSC)	EUPSC,OCTBI	KQ426075:107637..316839	209202	OCTBI_Ocbimv22006687m.p,OCTBI_Ocbimv22006688m.p,OCTBI_Ocbimv22006691m.p,OCTBI_Ocbimv22006692m.p,OCTBI_Ocbimv22006693m.p
3707	CALMI	3708(OCTBI)	CALMI,OCTBI	oct002059F:92090..375473	283383	CALMI_Omin006205p,CALMI_Omin006207p,CALMI_Omin006204p
3720	CALMI	4331(EUPSC)	EUPSC,OCTBI,CALMI	oct004647F:14854..236908	222054	CALMI_Omin009306p,CALMI_Omin009309p,CALMI_Omin009308p,CALMI_Omin009307p,CALMI_Omin009310p
14520	EUPSC	14519(OCTBI)	OCTBI,EUPSC	Lachesis_group42__34_contigs__length_44581599:21006532..21328622	322090	EUPSC_cluster_5989,EUPSC_cluster_24227,EUPSC_cluster_5070	PF07534 TLD; PF01529 DHHC palmitoyltransferase; PF02493 MORN repeat-PF02493 MORN repeat-PF02493 MORN repeat-PF02493 MORN repeat-PF02493 MORN repeat
2032	CALMI	4227(EUPSC),3472(OCTBI)	EUPSC,CALMI,OCTBI	oct008329F:4..154366	154362	CALMI_Omin014928p,CALMI_Omin014929p,CALMI_Omin014925p,CALMI_Omin014923p,CALMI_Omin014930p,CALMI_Omin014924p,CALMI_Omin014926p
13849	OCTBI	13848(EUPSC)	EUPSC,OCTBI	KQ416641:264030..402657	138627	OCTBI_Ocbimv22036412m.p,OCTBI_Ocbimv22036413m.p,OCTBI_Ocbimv22036416m.p,OCTBI_Ocbimv22036417m.p
3319	CALMI	3320(OCTBI)	EUPSC,CALMI,OCTBI	oct014229F:2100..92454	90354	CALMI_Omin027897p,CALMI_Omin027896p,CALMI_Omin027895p,CALMI_Omin027898p
13981	EUPSC	3036(OCTBI)	EUPSC,OCTBI,CALMI	Lachesis_group13__58_contigs__length_132030582:55453630..56019011	565381	EUPSC_cluster_7475,EUPSC_cluster_3761,EUPSC_cluster_13892	PF01529 DHHC palmitoyltransferase; PF00412 LIM domain-PF00788 Ras association (RalGDS/AF-6) domain-PF04503 Single-stranded DNA binding protein, SSDP; PF03770 Inositol polyphosphate kinase
3609	CALMI	4467(EUPSC),3610(OCTBI)	EUPSC,OCTBI,CALMI	oct000672F:174894..467407	292513	CALMI_Omin005952p,CALMI_Omin005956p,CALMI_Omin005953p,CALMI_Omin005954p,CALMI_Omin005951p
4456	EUPSC	2825(CALMI),2826(OCTBI)	EUPSC,OCTBI,CALMI	Lachesis_group35__42_contigs__length_70637049:63749419..63847872	98453	EUPSC_cluster_16069,EUPSC_cluster_22497,EUPSC_cluster_9117,EUPSC_cluster_29213	; PF02966 Mitosis protein DIM1; PF01746 tRNA (Guanine-1)-methyltransferase; PF10183 ESSS subunit of NADH:ubiquinone oxidoreductase (complex I)
3363	OCTBI	4276(EUPSC),3364(CALMI)	EUPSC,CALMI,OCTBI	KQ416359:898668..1263128	364460	OCTBI_Ocbimv22030613m.p,OCTBI_Ocbimv22030617m.p,OCTBI_Ocbimv22030621m.p,OCTBI_Ocbimv22030607m.p,OCTBI_Ocbimv22030623m.p
3490	CALMI	3491(OCTBI),4212(EUPSC)	EUPSC,OCTBI,CALMI	oct005242F:6999..127935	120936	CALMI_Omin014653p,CALMI_Omin014655p,CALMI_Omin014654p
3946	OCTBI	3947(CALMI),4156(EUPSC)	EUPSC,CALMI,OCTBI	KQ422923:191805..289281	97476	OCTBI_Ocbimv22037107m.p,OCTBI_Ocbimv22037109m.p,OCTBI_Ocbimv22037112m.p
4195	EUPSC	2677(OCTBI),3852(CALMI)	CALMI,OCTBI,EUPSC	Lachesis_group30__51_contigs__length_87052432:80814763..81355392	540629	EUPSC_cluster_1510,EUPSC_cluster_20525,EUPSC_cluster_10123,EUPSC_cluster_5072,EUPSC_cluster_3434	PF00613 Phosphoinositide 3-kinase family, accessory domain (PIK domain)-PF00454 Phosphatidylinositol 3- and 4-kinase; ; PF02866 lactate/malate dehydrogenase, alpha/beta C-terminal domain-PF02866 lactate/malate dehydrogenase, alpha/beta C-terminal domain; PF12773 Double zinc ribbon; PF08190 pre-RNA processing PIH1/Nop17
2756	CALMI	2757(OCTBI)	OCTBI,CALMI	oct004134F:4975..139231	134256	CALMI_Omin008645p,CALMI_Omin008643p,CALMI_Omin008642p,CALMI_Omin008640p
13830	OCTBI	13829(EUPSC)	OCTBI,EUPSC	KQ419810:9500..121500	112000	OCTBI_Ocbimv22025467m.p,OCTBI_Ocbimv22025468m.p,OCTBI_Ocbimv22025469m.p,OCTBI_Ocbimv22025470m.p,OCTBI_Ocbimv22025471m.p,OCTBI_Ocbimv22025472m.p
3041	OCTBI	14222(EUPSC),3042(CALMI)	CALMI,OCTBI,EUPSC	KQ416196:179434..403028	223594	OCTBI_Ocbimv22026664m.p,OCTBI_Ocbimv22026665m.p,OCTBI_Ocbimv22026667m.p,OCTBI_Ocbimv22026663m.p
2992	CALMI	2993(OCTBI),4301(EUPSC)	OCTBI,CALMI,EUPSC	oct006885F:9566..163078	153512	CALMI_Omin013916p,CALMI_Omin013914p,CALMI_Omin013915p,CALMI_Omin013917p,CALMI_Omin013919p
14225	EUPSC	14224(OCTBI)	OCTBI,EUPSC	Lachesis_group28__49_contigs__length_91470296:64207785..64786983	579198	EUPSC_cluster_7950,EUPSC_cluster_3002,EUPSC_cluster_500	PF08313 SCA7, zinc-binding domain; ; PF01000 RNA polymerase Rpb3/RpoA insert domain-PF01193 RNA polymerase Rpb3/Rpb11 dimerisation domain
3857	CALMI	3856(OCTBI),4356(EUPSC)	OCTBI,CALMI,EUPSC	oct000110F:92100..930874	838774	CALMI_Omin005261p,CALMI_Omin005256p,CALMI_Omin005258p,CALMI_Omin005263p,CALMI_Omin005257p,CALMI_Omin005262p,CALMI_Omin005266p,CALMI_Omin005260p
3037	CALMI	3036(OCTBI)	CALMI,OCTBI,EUPSC	oct002497F:29084..128588	99504	CALMI_Omin007886p,CALMI_Omin007887p,CALMI_Omin007885p,CALMI_Omin007888p
1058	OCTBI	33(CALMI)	OCTBI,CALMI	KQ416049:122675..453818	331143	OCTBI_Ocbimv22021664m.p,OCTBI_Ocbimv22021666m.p,OCTBI_Ocbimv22021667m.p,OCTBI_Ocbimv22021657m.p,OCTBI_Ocbimv22021659m.p,OCTBI_Ocbimv22021661m.p,OCTBI_Ocbimv22021663m.p,OCTBI_Ocbimv22021668m.p,OCTBI_Ocbimv22021669m.p,OCTBI_Ocbimv22021670m.p,OCTBI_Ocbimv22021672m.p
14021	EUPSC	2647(OCTBI)	CALMI,OCTBI,EUPSC	Lachesis_group15__55_contigs__length_125787758:101866535..102574590	708055	EUPSC_cluster_13470,EUPSC_cluster_4841,EUPSC_cluster_4869	PF01412 Putative GTPase activating protein for Arf; PF00659 POLO box duplicated region-PF00659 POLO box duplicated region-PF00069 Protein kinase domain; PF05517 p25-alpha
3098	CALMI	3097(OCTBI)	CALMI,OCTBI	oct004769F:2072..191772	189700	CALMI_Omin007695p,CALMI_Omin007696p,CALMI_Omin007699p,CALMI_Omin007697p,CALMI_Omin007700p,CALMI_Omin007701p
3955	OCTBI	3954(CALMI)	CALMI,OCTBI	KQ419500:538190..815125	276935	OCTBI_Ocbimv22023921m.p,OCTBI_Ocbimv22023925m.p,OCTBI_Ocbimv22023927m.p,OCTBI_Ocbimv22023929m.p
14004	EUPSC	14003(OCTBI)	EUPSC,OCTBI	Lachesis_group43__26_contigs__length_23511657:5266930..5895376	628446	EUPSC_cluster_5149,EUPSC_cluster_21040,EUPSC_cluster_12456	PF07565 Band 3 cytoplasmic domain-PF00955 HCO3- transporter family; PF07738 Sad1 / UNC-like C-terminal; PF05383 La domain
3254	CALMI	3253(OCTBI)	OCTBI,CALMI	oct009442F:1068..135986	134918	CALMI_Omin014391p,CALMI_Omin014390p,CALMI_Omin014392p
14274	OCTBI	14273(EUPSC)	OCTBI,EUPSC	KQ419354:54379..300672	246293	OCTBI_Ocbimv22023131m.p,OCTBI_Ocbimv22023132m.p,OCTBI_Ocbimv22023134m.p,OCTBI_Ocbimv22023135m.p
4445	EUPSC	3196(OCTBI),3195(CALMI)	OCTBI,CALMI,EUPSC	Lachesis_group14__44_contigs__length_129294686:81149169..82071001	921832	EUPSC_cluster_10048,EUPSC_cluster_15082,EUPSC_cluster_16420,EUPSC_cluster_13045	PF00736 EF-1 guanine nucleotide exchange domain-PF10587 Eukaryotic elongation factor 1 beta central acidic region; PF00808 Histone-like transcription factor (CBF/NF-Y) and archaeal histone; PF11789 Zinc-finger of the MIZ type in Nse subunit; PF00230 Major intrinsic protein
14507	EUPSC	14508(OCTBI)	OCTBI,EUPSC	Lachesis_group5__70_contigs__length_158228327:145154948..145351409	196461	EUPSC_cluster_8260,EUPSC_cluster_7687,EUPSC_cluster_20220,EUPSC_cluster_1842	PF00232 Glycosyl hydrolase family 1-PF00232 Glycosyl hydrolase family 1; PF02146 Sir2 family; PF01205 Uncharacterized protein family UPF0029-PF00168 C2 domain; PF00168 C2 domain-PF00168 C2 domain-PF07002 Copine
2514	CALMI	2515(OCTBI)	CALMI,OCTBI	oct004915F:1184..200660	199476	CALMI_Omin006045p,CALMI_Omin006047p,CALMI_Omin006046p,CALMI_Omin006049p,CALMI_Omin006048p
13999	EUPSC	14000(OCTBI)	OCTBI,EUPSC	Lachesis_group1__63_contigs__length_187967259:65971950..66221344	249394	EUPSC_cluster_13403,EUPSC_cluster_9916,EUPSC_cluster_12996	PF00083 Sugar (and other) transporter; PF00400 WD domain, G-beta repeat-PF00400 WD domain, G-beta repeat-PF00400 WD domain, G-beta repeat-PF00400 WD domain, G-beta repeat-PF00400 WD domain, G-beta repeat;
3140	CALMI	3139(OCTBI)	OCTBI,CALMI	oct006820F:80642..187783	107141	CALMI_Omin015754p,CALMI_Omin015755p,CALMI_Omin015753p,CALMI_Omin015756p
14499	EUPSC	14498(OCTBI)	OCTBI,EUPSC	Lachesis_group16__53_contigs__length_120303996:92781671..93198248	416577	EUPSC_cluster_26198,EUPSC_cluster_5570,EUPSC_cluster_26199,EUPSC_cluster_26200	; PF00595 PDZ domain (Also known as DHR or GLGF); ; PF00595 PDZ domain (Also known as DHR or GLGF)
3895	OCTBI	3896(CALMI)	CALMI,OCTBI	KQ423609:832756..894772	62016	OCTBI_Ocbimv22039299m.p,OCTBI_Ocbimv22039300m.p,OCTBI_Ocbimv22039301m.p
3561	CALMI	4348(EUPSC),3562(OCTBI)	EUPSC,OCTBI,CALMI	oct001871F:71926..307312	235386	CALMI_Omin008170p,CALMI_Omin008169p,CALMI_Omin008168p,CALMI_Omin008171p
2901	OCTBI	2902(CALMI)	OCTBI,CALMI	KQ424569:108758..172992	64234	OCTBI_Ocbimv22002182m.p,OCTBI_Ocbimv22002183m.p,OCTBI_Ocbimv22002186m.p
3163	OCTBI	2843(CALMI),3166(CALMI)	OCTBI,CALMI	KQ416081:185683..260974	75291	OCTBI_Ocbimv22023138m.p,OCTBI_Ocbimv22023139m.p,OCTBI_Ocbimv22023140m.p,OCTBI_Ocbimv22023141m.p,OCTBI_Ocbimv22023142m.p
14361	EUPSC	14362(OCTBI)	OCTBI,EUPSC	Lachesis_group34__47_contigs__length_76047342:10777938..11677012	899074	EUPSC_cluster_25322,EUPSC_cluster_25320,EUPSC_cluster_8087,EUPSC_cluster_9940	PF14726 Rotatin, an armadillo repeat protein, centriole functioning; PF00122 E1-E2 ATPase-PF13246 Cation transport ATPase (P-type)-PF00702 haloacid dehalogenase-like hydrolase-PF00690 Cation transporter/ATPase, N-terminus; PF12234 RAVE protein 1 C terminal-PF12234 RAVE protein 1 C terminal-PF00400 WD domain, G-beta repeat; PF00122 E1-E2 ATPase-PF12409 P5-type ATPase cation transporter-PF00702 hal…
3221	CALMI	3220(OCTBI)	OCTBI,CALMI	oct011448F:11860..79076	67216	CALMI_Omin026560p,CALMI_Omin026558p,CALMI_Omin026559p
4279	EUPSC	3123(OCTBI),3122(CALMI)	CALMI,OCTBI,EUPSC	Lachesis_group21__43_contigs__length_103963499:62649714..63223921	574207	EUPSC_cluster_2217,EUPSC_cluster_647,EUPSC_cluster_6729,EUPSC_cluster_20698	PF08357 SEFIR domain; PF12632 Mysoin-binding motif of peroxisomes; ; PF03133 Tubulin-tyrosine ligase family
13915	EUPSC	13914(OCTBI)	OCTBI,EUPSC	Lachesis_group7__52_contigs__length_145002158:39731875..40078950	347075	EUPSC_cluster_21938,EUPSC_cluster_14643,EUPSC_cluster_6087,EUPSC_cluster_21931	PF06468 Spondin_N; PF10510 Phosphatidylinositol-glycan biosynthesis class S protein; PF10257 Retinoic acid induced 16-like protein; PF10510 Phosphatidylinositol-glycan biosynthesis class S protein
3197	OCTBI	3198(CALMI)	CALMI,OCTBI	KQ418018:772419..1208313	435894	OCTBI_Ocbimv22013386m.p,OCTBI_Ocbimv22013389m.p,OCTBI_Ocbimv22013391m.p,OCTBI_Ocbimv22013392m.p,OCTBI_Ocbimv22013394m.p,OCTBI_Ocbimv22013395m.p,OCTBI_Ocbimv22013380m.p,OCTBI_Ocbimv22013382m.p,OCTBI_Ocbimv22013383m.p,OCTBI_Ocbimv22013385m.p,OCTBI_Ocbimv22013379m.p
14415	OCTBI	14416(EUPSC)	OCTBI,EUPSC	KQ417374:78989..226370	147381	OCTBI_Ocbimv22007064m.p,OCTBI_Ocbimv22007065m.p,OCTBI_Ocbimv22007068m.p
2611	OCTBI	2610(CALMI)	CALMI,OCTBI	KQ428981:7525..67623	60098	OCTBI_Ocbimv22014535m.p,OCTBI_Ocbimv22014537m.p,OCTBI_Ocbimv22014538m.p,OCTBI_Ocbimv22014539m.p
14301	OCTBI	14302(EUPSC)	EUPSC,OCTBI	KQ424157:465526..672191	206665	OCTBI_Ocbimv22001029m.p,OCTBI_Ocbimv22001031m.p,OCTBI_Ocbimv22001033m.p,OCTBI_Ocbimv22001036m.p
3022	CALMI	4340(EUPSC)	CALMI,OCTBI,EUPSC	oct005758F:292..193261	192969	CALMI_Omin013009p,CALMI_Omin013008p,CALMI_Omin013005p,CALMI_Omin013007p,CALMI_Omin013006p
3794	OCTBI	4221(EUPSC),3795(CALMI)	EUPSC,OCTBI,CALMI	KQ417578:166179..449969	283790	OCTBI_Ocbimv22009240m.p,OCTBI_Ocbimv22009243m.p,OCTBI_Ocbimv22009244m.p,OCTBI_Ocbimv22009246m.p,OCTBI_Ocbimv22009248m.p
14375	OCTBI	14376(EUPSC)	EUPSC,OCTBI	KQ422286:845..99074	98229	OCTBI_Ocbimv22035125m.p,OCTBI_Ocbimv22035128m.p,OCTBI_Ocbimv22035129m.p,OCTBI_Ocbimv22035132m.p
3664	OCTBI	3787(CALMI)	EUPSC,CALMI,OCTBI	KQ418784:48068..106445	58377	OCTBI_Ocbimv22019565m.p,OCTBI_Ocbimv22019567m.p,OCTBI_Ocbimv22019568m.p,OCTBI_Ocbimv22019569m.p
14064	EUPSC	14065(OCTBI)	EUPSC,OCTBI	Lachesis_group36__35_contigs__length_73496112:22148744..22651704	502960	EUPSC_cluster_9043,EUPSC_cluster_9991,EUPSC_cluster_1790	; PF13915 Domain of unknown function (DUF4210)-PF13889 Chromosome segregation during meiosis; PF00638 RanBP1 domain
3355	OCTBI	3354(CALMI)	CALMI,OCTBI	KQ416615:11045..47508	36463	OCTBI_Ocbimv22036052m.p,OCTBI_Ocbimv22036053m.p,OCTBI_Ocbimv22036054m.p
3572	OCTBI	3571(CALMI)	CALMI,OCTBI	KQ425509:14179..47916	33737	OCTBI_Ocbimv22005055m.p,OCTBI_Ocbimv22005057m.p,OCTBI_Ocbimv22005058m.p
14112	OCTBI	14113(EUPSC)	OCTBI,EUPSC	KQ416694:2908142..3155140	246998	OCTBI_Ocbimv22037430m.p,OCTBI_Ocbimv22037431m.p,OCTBI_Ocbimv22037433m.p
14567	OCTBI	14566(EUPSC)	EUPSC,OCTBI	KQ427339:55173..153707	98534	OCTBI_Ocbimv22010267m.p,OCTBI_Ocbimv22010268m.p,OCTBI_Ocbimv22010270m.p
14118	OCTBI	14117(EUPSC)	EUPSC,OCTBI	KQ422913:11582..91760	80178	OCTBI_Ocbimv22037056m.p,OCTBI_Ocbimv22037061m.p,OCTBI_Ocbimv22037063m.p,OCTBI_Ocbimv22037057m.p
12220	EUPSC	9964(OCTBI)	OCTBI,EUPSC	Lachesis_group12__46_contigs__length_133395132:90136001..97576843	7440842	EUPSC_cluster_13616,EUPSC_cluster_4453,EUPSC_cluster_20158,EUPSC_cluster_908,EUPSC_cluster_4590,EUPSC_cluster_12360,EUPSC_cluster_5674,EUPSC_cluster_4687,EUPSC_cluster_20155,EUPSC_cluster_7729,EUPSC_cluster_2739	PF00095 WAP-type (Whey Acidic Protein) 'four-disulfide core'-PF00084 Sushi repeat (SCR repeat)-PF00084 Sushi repeat (SCR repeat)-PF00084 Sushi repeat (SCR repeat)-PF00084 Sushi repeat (SCR repeat)-PF00084 Sushi repeat (SCR repeat)-PF00084 Sushi repeat (SCR repeat)-PF00084 Sushi repeat (SCR repeat)-PF00084 Sushi repeat (SCR repeat); PF00095 WAP-type (Whey Acidic Protein) 'four-disulfide core'-PF00…
3242	CALMI	2725(OCTBI)	CALMI,OCTBI	oct003384F:37281..240203	202922	CALMI_Omin006715p,CALMI_Omin006712p,CALMI_Omin006716p,CALMI_Omin006714p,CALMI_Omin006713p
14126	OCTBI	14127(EUPSC)	OCTBI,EUPSC	KQ418900:394449..489879	95430	OCTBI_Ocbimv22020365m.p,OCTBI_Ocbimv22020366m.p,OCTBI_Ocbimv22020367m.p,OCTBI_Ocbimv22020369m.p
2750	OCTBI	2749(CALMI)	OCTBI,CALMI	KQ418320:384034..599246	215212	OCTBI_Ocbimv22016118m.p,OCTBI_Ocbimv22016119m.p,OCTBI_Ocbimv22016123m.p,OCTBI_Ocbimv22016124m.p,OCTBI_Ocbimv22016125m.p
3155	CALMI	3154(OCTBI)	EUPSC,OCTBI,CALMI	oct007043F:44637..138733	94096	CALMI_Omin010971p,CALMI_Omin010970p,CALMI_Omin010973p,CALMI_Omin010974p,CALMI_Omin010972p
13957	EUPSC	13958(OCTBI)	EUPSC,OCTBI	Lachesis_group1__63_contigs__length_187967259:47001413..47315574	314161	EUPSC_cluster_27498,EUPSC_cluster_13765,EUPSC_cluster_7643	; ; PF11976 Ubiquitin-2 like Rad60 SUMO-like
14457	OCTBI	14456(EUPSC)	OCTBI,EUPSC	KQ425655:60380..322313	261933	OCTBI_Ocbimv22005570m.p,OCTBI_Ocbimv22005571m.p,OCTBI_Ocbimv22005572m.p,OCTBI_Ocbimv22005575m.p,OCTBI_Ocbimv22005577m.p,OCTBI_Ocbimv22005580m.p
14324	OCTBI	9094(EUPSC)	EUPSC,OCTBI	KQ426371:1409..276194	274785	OCTBI_Ocbimv22007539m.p,OCTBI_Ocbimv22007542m.p,OCTBI_Ocbimv22007543m.p,OCTBI_Ocbimv22007544m.p,OCTBI_Ocbimv22007545m.p,OCTBI_Ocbimv22007546m.p,OCTBI_Ocbimv22007547m.p
4450	EUPSC	2765(OCTBI),2764(CALMI)	EUPSC,OCTBI,CALMI	Lachesis_group2__55_contigs__length_182973478:121093130..121679117	585987	EUPSC_cluster_8542,EUPSC_cluster_18892,EUPSC_cluster_15297,EUPSC_cluster_28195	PF13193 AMP-binding enzyme C-terminal domain-PF16177 Acetyl-coenzyme A synthetase N-terminus-PF00501 AMP-binding enzyme; PF07714 Protein tyrosine kinase; PF04427 Brix domain; PF00651 BTB/POZ domain-PF01344 Kelch motif-PF01344 Kelch motif-PF01344 Kelch motif-PF01344 Kelch motif-PF01344 Kelch motif-PF07707 BTB And C-terminal Kelch
13883	EUPSC	13882(OCTBI)	OCTBI,EUPSC	Lachesis_group0__68_contigs__length_203855924:147671755..148196989	525234	EUPSC_cluster_322,EUPSC_cluster_6885,EUPSC_cluster_10885,EUPSC_cluster_13557	PF02518 Histidine kinase-, DNA gyrase B-, and HSP90-like ATPase-PF00183 Hsp90 protein; PF00078 Reverse transcriptase (RNA-dependent DNA polymerase)-PF04577 Protein of unknown function (DUF563); PF00104 Ligand-binding domain of nuclear hormone receptor-PF00104 Ligand-binding domain of nuclear hormone receptor-PF00105 Zinc finger, C4 type (two domains); PF00105 Zinc finger, C4 type (two domains)
3919	OCTBI	3920(CALMI)	OCTBI,CALMI	KQ416751:209439..345249	135810	OCTBI_Ocbimv22038558m.p,OCTBI_Ocbimv22038559m.p,OCTBI_Ocbimv22038560m.p
2928	OCTBI	2927(CALMI)	CALMI,OCTBI	KQ417824:375439..421774	46335	OCTBI_Ocbimv22011701m.p,OCTBI_Ocbimv22011702m.p,OCTBI_Ocbimv22011704m.p
3208	OCTBI	3209(CALMI)	CALMI,OCTBI	KQ418721:2570..432084	429514	OCTBI_Ocbimv22019140m.p,OCTBI_Ocbimv22019141m.p,OCTBI_Ocbimv22019143m.p
2503	CALMI	4327(EUPSC),2504(OCTBI)	CALMI,OCTBI,EUPSC	oct003402F:52006..167541	115535	CALMI_Omin006542p,CALMI_Omin006545p,CALMI_Omin006543p
3397	OCTBI	3396(CALMI)	OCTBI,CALMI	KQ421682:3..44386	44383	OCTBI_Ocbimv22032903m.p,OCTBI_Ocbimv22032904m.p,OCTBI_Ocbimv22032906m.p
3346	OCTBI	3345(CALMI)	OCTBI,CALMI	KQ425573:37155..92219	55064	OCTBI_Ocbimv22005304m.p,OCTBI_Ocbimv22005305m.p,OCTBI_Ocbimv22005307m.p
14270	OCTBI	14269(EUPSC)	OCTBI,EUPSC	KQ415791:80425..482282	401857	OCTBI_Ocbimv22002338m.p,OCTBI_Ocbimv22002341m.p,OCTBI_Ocbimv22002342m.p,OCTBI_Ocbimv22002343m.p
14000	OCTBI	13999(EUPSC)	EUPSC,OCTBI	KQ430572:462214..517133	54919	OCTBI_Ocbimv22018120m.p,OCTBI_Ocbimv22018122m.p,OCTBI_Ocbimv22018123m.p
3496	CALMI	4406(EUPSC)	EUPSC,CALMI	oct001032F:26328..252734	226406	CALMI_Omin010328p,CALMI_Omin010331p,CALMI_Omin010332p,CALMI_Omin010329p,CALMI_Omin010330p
2827	CALMI	2828(OCTBI)	OCTBI,CALMI	oct000492F:46604..657742	611138	CALMI_Omin009457p,CALMI_Omin009462p,CALMI_Omin009464p,CALMI_Omin009465p,CALMI_Omin009458p,CALMI_Omin009466p,CALMI_Omin009463p,CALMI_Omin009460p
2800	OCTBI	2801(CALMI),4303(EUPSC)	EUPSC,CALMI,OCTBI	KQ416027:1615..295320	293705	OCTBI_Ocbimv22020428m.p,OCTBI_Ocbimv22020429m.p,OCTBI_Ocbimv22020430m.p,OCTBI_Ocbimv22020432m.p,OCTBI_Ocbimv22020433m.p,OCTBI_Ocbimv22020425m.p
3687	CALMI	3686(OCTBI)	OCTBI,CALMI	oct011943F:6849..44106	37257	CALMI_Omin026430p,CALMI_Omin026431p,CALMI_Omin026432p
3335	OCTBI	3334(CALMI)	OCTBI,CALMI	KQ426321:51667..101488	49821	OCTBI_Ocbimv22007391m.p,OCTBI_Ocbimv22007393m.p,OCTBI_Ocbimv22007394m.p
14367	EUPSC	14366(OCTBI)	OCTBI,EUPSC	Lachesis_group19__43_contigs__length_108131866:32078430..32291205	212775	EUPSC_cluster_29251,EUPSC_cluster_10565,EUPSC_cluster_3177,EUPSC_cluster_2894	PF00935 Ribosomal protein L44; ; PF00069 Protein kinase domain; PF10523 BEN domain
13890	OCTBI	13891(EUPSC)	OCTBI,EUPSC	KQ419458:292180..402378	110198	OCTBI_Ocbimv22023678m.p,OCTBI_Ocbimv22023682m.p,OCTBI_Ocbimv22023683m.p
3358	CALMI	3359(OCTBI)	CALMI,OCTBI	oct011779F:4075..116826	112751	CALMI_Omin026978p,CALMI_Omin026972p,CALMI_Omin026973p,CALMI_Omin026974p
14575	OCTBI	14576(EUPSC)	OCTBI,EUPSC	KQ416694:1068210..1419628	351418	OCTBI_Ocbimv22037387m.p,OCTBI_Ocbimv22037394m.p,OCTBI_Ocbimv22037395m.p,OCTBI_Ocbimv22037396m.p,OCTBI_Ocbimv22037397m.p
3603	OCTBI	3604(CALMI)	OCTBI,CALMI	KQ418170:1772..78153	76381	OCTBI_Ocbimv22014718m.p,OCTBI_Ocbimv22014720m.p,OCTBI_Ocbimv22014721m.p
14501	EUPSC	14500(OCTBI)	OCTBI,EUPSC	Lachesis_group6__62_contigs__length_156955521:65515522..65909102	393580	EUPSC_cluster_8155,EUPSC_cluster_5616,EUPSC_cluster_11626	PF03137 Organic Anion Transporter Polypeptide (OATP) family-PF07648 Kazal-type serine protease inhibitor domain; PF00400 WD domain, G-beta repeat-PF00400 WD domain, G-beta repeat-PF00400 WD domain, G-beta repeat-PF00400 WD domain, G-beta repeat-PF00400 WD domain, G-beta repeat; PF00884 Sulfatase-PF00884 Sulfatase-PF14707 C-terminal region of aryl-sulfatase
3169	CALMI	3170(OCTBI)	OCTBI,CALMI	oct007614F:50111..134917	84806	CALMI_Omin010640p,CALMI_Omin010641p,CALMI_Omin010639p
3451	OCTBI	3450(CALMI)	OCTBI,CALMI	KQ420502:186981..249203	62222	OCTBI_Ocbimv22028481m.p,OCTBI_Ocbimv22028482m.p,OCTBI_Ocbimv22028485m.p,OCTBI_Ocbimv22028486m.p
14524	EUPSC	14525(OCTBI)	EUPSC,OCTBI	Lachesis_group14__44_contigs__length_129294686:26270680..27010384	739704	EUPSC_cluster_15034,EUPSC_cluster_7764,EUPSC_cluster_12192,EUPSC_cluster_1436,EUPSC_cluster_1325	; PF01457 Leishmanolysin-PF01457 Leishmanolysin; ; PF00704 Glycosyl hydrolases family 18-PF00704 Glycosyl hydrolases family 18; PF07533 BRK domain-PF07500 Transcription factor S-II (TFIIS), central domain-PF07744 SPOC domain
3113	CALMI	3114(OCTBI)	CALMI,OCTBI	oct004032F:70065..190380	120315	CALMI_Omin007238p,CALMI_Omin007237p,CALMI_Omin007236p
13786	OCTBI	13787(EUPSC)	EUPSC,OCTBI	KQ417446:77801..194030	116229	OCTBI_Ocbimv22007714m.p,OCTBI_Ocbimv22007717m.p,OCTBI_Ocbimv22007718m.p
3677	CALMI	3676(OCTBI)	OCTBI,CALMI	oct003048F:226144..281948	55804	CALMI_Omin007683p,CALMI_Omin007684p,CALMI_Omin007682p
14439	OCTBI	14440(EUPSC)	EUPSC,OCTBI	KQ428994:131061..232734	101673	OCTBI_Ocbimv22014580m.p,OCTBI_Ocbimv22014581m.p,OCTBI_Ocbimv22014582m.p,OCTBI_Ocbimv22014587m.p
3511	CALMI	2828(OCTBI)	CALMI,OCTBI	oct004404F:11227..256419	245192	CALMI_Omin002707p,CALMI_Omin002704p,CALMI_Omin002705p,CALMI_Omin002708p,CALMI_Omin002706p
13939	EUPSC	13938(OCTBI)	OCTBI,EUPSC	Lachesis_group30__51_contigs__length_87052432:51546666..51834042	287376	EUPSC_cluster_7676,EUPSC_cluster_110,EUPSC_cluster_21450	PF13639 Ring finger domain; ;
13987	OCTBI	13988(EUPSC)	EUPSC,OCTBI	KQ428714:26241..169320	143079	OCTBI_Ocbimv22013923m.p,OCTBI_Ocbimv22013927m.p,OCTBI_Ocbimv22013928m.p,OCTBI_Ocbimv22013929m.p
2672	OCTBI	4239(EUPSC)	OCTBI,EUPSC	KQ423384:4078..388567	384489	OCTBI_Ocbimv22038511m.p,OCTBI_Ocbimv22038512m.p,OCTBI_Ocbimv22038513m.p,OCTBI_Ocbimv22038515m.p,OCTBI_Ocbimv22038508m.p,OCTBI_Ocbimv22038518m.p,OCTBI_Ocbimv22038520m.p,OCTBI_Ocbimv22038525m.p,OCTBI_Ocbimv22038528m.p
14487	EUPSC	14488(OCTBI)	OCTBI,EUPSC	Lachesis_group33__48_contigs__length_77384337:47881712..48012586	130874	EUPSC_cluster_3721,EUPSC_cluster_12290,EUPSC_cluster_13726	PF09379 FERM N-terminal domain-PF08736 FERM adjacent (FA)-PF09380 FERM C-terminal PH-like domain-PF05902 4.1 protein C-terminal domain (CTD)-PF00373 FERM central domain; ; PF05902 4.1 protein C-terminal domain (CTD)
13853	EUPSC	13852(OCTBI)	EUPSC,OCTBI	Lachesis_group8__53_contigs__length_148332072:92439041..92794981	355940	EUPSC_cluster_13032,EUPSC_cluster_1556,EUPSC_cluster_4683	PF00011 Hsp20/alpha crystallin family; PF00096 Zinc finger, C2H2 type-PF00096 Zinc finger, C2H2 type-PF00096 Zinc finger, C2H2 type-PF00096 Zinc finger, C2H2 type-PF00096 Zinc finger, C2H2 type; PF00743 Flavin-binding monooxygenase-like-PF00743 Flavin-binding monooxygenase-like
2564	CALMI	2565(OCTBI)	OCTBI,CALMI	oct000452F:556925..651989	95064	CALMI_Omin005832p,CALMI_Omin005836p,CALMI_Omin005833p,CALMI_Omin005837p
2925	OCTBI	2926(CALMI)	OCTBI,CALMI	KQ416040:299672..368577	68905	OCTBI_Ocbimv22021192m.p,OCTBI_Ocbimv22021193m.p,OCTBI_Ocbimv22021194m.p
13940	EUPSC	13941(OCTBI)	EUPSC,OCTBI	Lachesis_group21__43_contigs__length_103963499:37828230..38527793	699563	EUPSC_cluster_14855,EUPSC_cluster_3630,EUPSC_cluster_24813,EUPSC_cluster_8320	PF03765 CRAL/TRIO, N-terminal domain-PF00650 CRAL/TRIO domain; ; PF03099 Biotin/lipoate A/B protein ligase family; PF12796 Ankyrin repeats (3 copies)
3904	OCTBI	3905(CALMI)	OCTBI,CALMI	KQ419781:9454..205875	196421	OCTBI_Ocbimv22025355m.p,OCTBI_Ocbimv22025356m.p,OCTBI_Ocbimv22025359m.p,OCTBI_Ocbimv22025361m.p,OCTBI_Ocbimv22025363m.p
14440	EUPSC	14439(OCTBI)	OCTBI,EUPSC	Lachesis_group13__58_contigs__length_132030582:117274242..117818113	543871	EUPSC_cluster_21261,EUPSC_cluster_1335,EUPSC_cluster_21262,EUPSC_cluster_21263,EUPSC_cluster_15585	PF06309 Torsin-PF02995 Protein of unknown function (DUF229); PF02828 L27 domain-PF00595 PDZ domain (Also known as DHR or GLGF); PF06309 Torsin; PF02892 BED zinc finger;
14185	EUPSC	3178(OCTBI)	EUPSC,CALMI,OCTBI	Lachesis_group12__46_contigs__length_133395132:84330366..85272894	942528	EUPSC_cluster_9606,EUPSC_cluster_25303,EUPSC_cluster_10786,EUPSC_cluster_28081	PF02515 CoA-transferase family III; PF13640 2OG-Fe(II) oxygenase superfamily; PF00007 Cystine-knot domain; PF04706 Dickkopf N-terminal cysteine-rich region
3556	CALMI	3557(OCTBI)	CALMI,OCTBI	oct008541F:54123..91207	37084	CALMI_Omin013164p,CALMI_Omin013165p,CALMI_Omin013167p
4368	EUPSC	3231(CALMI),3230(OCTBI)	OCTBI,CALMI,EUPSC	Lachesis_group24__36_contigs__length_98752639:80172245..82444321	2272076	EUPSC_cluster_9308,EUPSC_cluster_4175,EUPSC_cluster_23501,EUPSC_cluster_8531,EUPSC_cluster_23502	PF02793 Hormone receptor domain-PF00002 7 transmembrane receptor (Secretin family); ; PF00749 tRNA synthetases class I (E and Q), catalytic domain; PF00169 PH domain-PF14604 Variant SH3 domain-PF00621 RhoGEF domain;
14022	OCTBI	14023(EUPSC)	OCTBI,EUPSC	KQ418269:451735..808028	356293	OCTBI_Ocbimv22015624m.p,OCTBI_Ocbimv22015625m.p,OCTBI_Ocbimv22015630m.p
3416	CALMI	3415(OCTBI)	CALMI,OCTBI	oct003279F:153..240587	240434	CALMI_Omin002435p,CALMI_Omin002434p,CALMI_Omin002433p
2648	CALMI	2480(OCTBI),4229(EUPSC)	OCTBI,CALMI,EUPSC	oct008529F:19851..127563	107712	CALMI_Omin013829p,CALMI_Omin013828p,CALMI_Omin013830p,CALMI_Omin013827p
14535	EUPSC	3961(OCTBI)	EUPSC,OCTBI,CALMI	Lachesis_group6__62_contigs__length_156955521:143592347..144068856	476509	EUPSC_cluster_3696,EUPSC_cluster_3402,EUPSC_cluster_20073	PF00041 Fibronectin type III domain-PF13637 Ankyrin repeats (many copies); PF13532 2OG-Fe(II) oxygenase superfamily-PF02668 Taurine catabolism dioxygenase TauD, TfdA family; PF03874 RNA polymerase Rpb4
3065	OCTBI	3066(CALMI)	OCTBI,CALMI	KQ420690:8228..176766	168538	OCTBI_Ocbimv22029234m.p,OCTBI_Ocbimv22029236m.p,OCTBI_Ocbimv22029237m.p,OCTBI_Ocbimv22029238m.p
2880	CALMI	2881(OCTBI)	OCTBI,CALMI	oct003488F:1841..137851	136010	CALMI_Omin000678p,CALMI_Omin000676p,CALMI_Omin000679p
3607	OCTBI	3608(CALMI)	OCTBI,CALMI	KQ423941:10348..211766	201418	OCTBI_Ocbimv22000364m.p,OCTBI_Ocbimv22000366m.p,OCTBI_Ocbimv22000365m.p,OCTBI_Ocbimv22000367m.p,OCTBI_Ocbimv22000371m.p,OCTBI_Ocbimv22000359m.p,OCTBI_Ocbimv22000361m.p,OCTBI_Ocbimv22000358m.p,OCTBI_Ocbimv22000360m.p
3620	OCTBI	3621(CALMI)	CALMI,OCTBI	KQ420078:2235..231173	228938	OCTBI_Ocbimv22026598m.p,OCTBI_Ocbimv22026600m.p,OCTBI_Ocbimv22026601m.p,OCTBI_Ocbimv22026597m.p
3683	OCTBI	3682(CALMI)	OCTBI,CALMI	KQ417828:14840..157805	142965	OCTBI_Ocbimv22011747m.p,OCTBI_Ocbimv22011748m.p,OCTBI_Ocbimv22011749m.p,OCTBI_Ocbimv22011750m.p
2823	OCTBI	2824(CALMI)	CALMI,OCTBI	KQ418418:411..49972	49561	OCTBI_Ocbimv22016884m.p,OCTBI_Ocbimv22016885m.p,OCTBI_Ocbimv22016886m.p
2602	CALMI	2603(OCTBI)	OCTBI,CALMI	oct005985F:13814..154269	140455	CALMI_Omin013735p,CALMI_Omin013734p,CALMI_Omin013733p
3039	CALMI	3040(OCTBI)	OCTBI,CALMI	oct002442F:30636..109925	79289	CALMI_Omin010139p,CALMI_Omin010140p,CALMI_Omin010141p
2475	OCTBI	2476(CALMI)	OCTBI,CALMI	KQ424999:4730..161674	156944	OCTBI_Ocbimv22003375m.p,OCTBI_Ocbimv22003379m.p,OCTBI_Ocbimv22003380m.p,OCTBI_Ocbimv22003381m.p
14482	OCTBI	4135(EUPSC)	OCTBI,CALMI,EUPSC	KQ417771:366088..811671	445583	OCTBI_Ocbimv22011255m.p,OCTBI_Ocbimv22011256m.p,OCTBI_Ocbimv22011261m.p
3868	OCTBI	3867(CALMI)	CALMI,OCTBI	KQ424015:416546..444999	28453	OCTBI_Ocbimv22000601m.p,OCTBI_Ocbimv22000604m.p,OCTBI_Ocbimv22000605m.p
14488	OCTBI	14487(EUPSC)	EUPSC,OCTBI	KQ427563:601..107898	107297	OCTBI_Ocbimv22010894m.p,OCTBI_Ocbimv22010895m.p,OCTBI_Ocbimv22010899m.p
3275	CALMI	3276(OCTBI)	OCTBI,CALMI	oct006311F:4730..100874	96144	CALMI_Omin014332p,CALMI_Omin014331p,CALMI_Omin014333p
13988	EUPSC	13987(OCTBI)	OCTBI,EUPSC	Lachesis_group1__63_contigs__length_187967259:132373576..132706225	332649	EUPSC_cluster_10509,EUPSC_cluster_7637,EUPSC_cluster_11732,EUPSC_cluster_26100,EUPSC_cluster_1639	PF02984 Cyclin, C-terminal domain-PF00134 Cyclin, N-terminal domain; PF13499 EF-hand domain pair-PF13833 EF-hand domain pair-PF13202 EF hand; PF13202 EF hand; PF04908 SH3-binding, glutamic acid-rich protein; PF16699 Cleavage stimulation factor subunit 1, dimerisation domain-PF00400 WD domain, G-beta repeat-PF00400 WD domain, G-beta repeat-PF00400 WD domain, G-beta repeat-PF00400 WD domain, G-beta…
2761	CALMI	2760(OCTBI)	OCTBI,CALMI	oct017424F:14031..68058	54027	CALMI_Omin020118p,CALMI_Omin020120p,CALMI_Omin020119p
14368	EUPSC	3565(OCTBI)	OCTBI,EUPSC	Lachesis_group21__43_contigs__length_103963499:34786985..36080455	1293470	EUPSC_cluster_8734,EUPSC_cluster_15157,EUPSC_cluster_18935,EUPSC_cluster_11368,EUPSC_cluster_11775,EUPSC_cluster_11927,EUPSC_cluster_9999,EUPSC_cluster_7870,EUPSC_cluster_10930	PF00225 Kinesin motor domain-PF00787 PX domain; PF00487 Fatty acid desaturase; PF00096 Zinc finger, C2H2 type-PF00096 Zinc finger, C2H2 type; PF00096 Zinc finger, C2H2 type-PF00096 Zinc finger, C2H2 type-PF00096 Zinc finger, C2H2 type-PF00096 Zinc finger, C2H2 type; PF01885 RNA 2'-phosphotransferase, Tpt1 / KptA family; PF01885 RNA 2'-phosphotransferase, Tpt1 / KptA family-PF01885 RNA 2'-phosphot…
2870	CALMI	2869(OCTBI)	OCTBI,CALMI	oct009318F:1862..107987	106125	CALMI_Omin014342p,CALMI_Omin014343p,CALMI_Omin014339p,CALMI_Omin014341p,CALMI_Omin014340p
14362	OCTBI	14361(EUPSC)	OCTBI,EUPSC	KQ423217:232025..531474	299449	OCTBI_Ocbimv22038128m.p,OCTBI_Ocbimv22038129m.p,OCTBI_Ocbimv22038131m.p,OCTBI_Ocbimv22038136m.p,OCTBI_Ocbimv22038140m.p
14294	OCTBI	14293(EUPSC)	EUPSC,OCTBI	KQ420138:546243..937797	391554	OCTBI_Ocbimv22026898m.p,OCTBI_Ocbimv22026899m.p,OCTBI_Ocbimv22026900m.p
2485	OCTBI	2486(CALMI),4438(EUPSC),3333(CALMI)	CALMI,OCTBI,EUPSC	KQ418049:173258..231398	58140	OCTBI_Ocbimv22013704m.p,OCTBI_Ocbimv22013705m.p,OCTBI_Ocbimv22013707m.p,OCTBI_Ocbimv22013703m.p
4461	EUPSC	3736(OCTBI),3737(CALMI)	CALMI,OCTBI,EUPSC	Lachesis_group17__52_contigs__length_118315660:67505547..67789671	284124	EUPSC_cluster_17369,EUPSC_cluster_17367,EUPSC_cluster_17362,EUPSC_cluster_8352	PF03357 Snf7; PF00849 RNA pseudouridylate synthase; PF10442 FIST C domain; PF00169 PH domain
3285	CALMI	3284(OCTBI)	CALMI,OCTBI	oct002789F:60608..167882	107274	CALMI_Omin007519p,CALMI_Omin007516p,CALMI_Omin007520p
14016	EUPSC	3695(OCTBI)	OCTBI,CALMI,EUPSC	Lachesis_group30__51_contigs__length_87052432:83891325..83986823	95498	EUPSC_cluster_6161,EUPSC_cluster_6162,EUPSC_cluster_20422	PF08032 RNA 2'-O ribose methyltransferase substrate binding-PF00588 SpoU rRNA Methylase family; PF13959 Domain of unknown function (DUF4217)-PF00271 Helicase conserved C-terminal domain-PF00270 DEAD/DEAH box helicase; PF00271 Helicase conserved C-terminal domain-PF13959 Domain of unknown function (DUF4217)-PF00270 DEAD/DEAH box helicase
3714	CALMI	3713(OCTBI)	OCTBI,CALMI	oct004988F:34298..128677	94379	CALMI_Omin006289p,CALMI_Omin006288p,CALMI_Omin006291p,CALMI_Omin006290p
13979	EUPSC	13978(OCTBI)	OCTBI,EUPSC	Lachesis_group0__68_contigs__length_203855924:112491899..113841055	1349156	EUPSC_cluster_6168,EUPSC_cluster_13280,EUPSC_cluster_9582,EUPSC_cluster_5724,EUPSC_cluster_15355,EUPSC_cluster_564,EUPSC_cluster_25583,EUPSC_cluster_7529,EUPSC_cluster_5430	; ; ; PF00999 Sodium/hydrogen exchanger family; PF02383 SacI homology domain; PF00839 Cysteine rich repeat-PF00839 Cysteine rich repeat-PF00839 Cysteine rich repeat-PF00839 Cysteine rich repeat-PF00839 Cysteine rich repeat-PF00839 Cysteine rich repeat-PF00839 Cysteine rich repeat-PF00839 Cysteine rich repeat-PF00839 Cysteine rich repeat-PF00839 Cysteine rich repeat-PF00839 Cysteine rich repeat-PF…
2691	CALMI	2692(OCTBI)	CALMI,OCTBI	oct002993F:134840..224001	89161	CALMI_Omin004602p,CALMI_Omin004604p,CALMI_Omin004603p,CALMI_Omin004605p
14479	EUPSC	14478(OCTBI)	EUPSC,OCTBI	Lachesis_group9__67_contigs__length_144638433:90713983..91158229	444246	EUPSC_cluster_9045,EUPSC_cluster_9044,EUPSC_cluster_24182,EUPSC_cluster_24184	PF00152 tRNA synthetases class II (D, K and N)-PF02938 GAD domain-PF01336 OB-fold nucleic acid binding domain; PF00107 Zinc-binding dehydrogenase-PF08240 Alcohol dehydrogenase GroES-like domain-PF02938 GAD domain-PF01336 OB-fold nucleic acid binding domain-PF00152 tRNA synthetases class II (D, K and N); PF00560 Leucine Rich Repeat-PF00560 Leucine Rich Repeat-PF13855 Leucine rich repeat-PF13855 Le…
3059	OCTBI	4452(EUPSC),3060(CALMI)	EUPSC,CALMI,OCTBI	KQ424880:55242..88154	32912	OCTBI_Ocbimv22003090m.p,OCTBI_Ocbimv22003091m.p,OCTBI_Ocbimv22003095m.p
3839	OCTBI	3838(CALMI),4444(EUPSC)	CALMI,OCTBI,EUPSC	KQ420314:69823..153426	83603	OCTBI_Ocbimv22027620m.p,OCTBI_Ocbimv22027622m.p,OCTBI_Ocbimv22027624m.p,OCTBI_Ocbimv22027625m.p
4365	EUPSC	4364(CALMI)	CALMI,EUPSC	Lachesis_group22__46_contigs__length_104782409:83088919..83258364	169445	EUPSC_cluster_1352,EUPSC_cluster_1353,EUPSC_cluster_26564	PF04091 Exocyst complex subunit Sec15-like; ; PF12799 Leucine Rich repeats (2 copies)
2645	CALMI	2644(OCTBI)	CALMI,OCTBI	oct001066F:6316..350542	344226	CALMI_Omin006375p,CALMI_Omin006376p,CALMI_Omin006372p,CALMI_Omin006374p,CALMI_Omin006373p
14013	EUPSC	14012(OCTBI)	EUPSC,OCTBI	Lachesis_group32__40_contigs__length_78634074:2644486..2991771	347285	EUPSC_cluster_2986,EUPSC_cluster_8628,EUPSC_cluster_9973	PF00884 Sulfatase; PF07973 Threonyl and Alanyl tRNA synthetase second additional domain-PF01411 tRNA synthetases class II (A);
3068	CALMI	3067(OCTBI)	OCTBI,CALMI,EUPSC	oct008565F:859..167525	166666	CALMI_Omin012957p,CALMI_Omin012958p,CALMI_Omin012955p,CALMI_Omin012959p,CALMI_Omin012956p
3193	CALMI	3194(OCTBI)	CALMI,OCTBI	oct004767F:100915..246339	145424	CALMI_Omin009042p,CALMI_Omin009044p,CALMI_Omin009046p
3591	CALMI	3590(OCTBI)	OCTBI,CALMI	oct004146F:2043..226926	224883	CALMI_Omin010009p,CALMI_Omin010012p,CALMI_Omin010016p,CALMI_Omin010013p,CALMI_Omin010014p,CALMI_Omin010008p,CALMI_Omin010015p
2478	OCTBI	14275(EUPSC),2477(CALMI)	EUPSC,CALMI,OCTBI	KQ418012:7886..281697	273811	OCTBI_Ocbimv22013321m.p,OCTBI_Ocbimv22013323m.p,OCTBI_Ocbimv22013324m.p,OCTBI_Ocbimv22013326m.p,OCTBI_Ocbimv22013328m.p,OCTBI_Ocbimv22013329m.p
14452	EUPSC	14451(OCTBI)	EUPSC,OCTBI	Lachesis_group27__44_contigs__length_93323795:73524653..75657460	2132807	EUPSC_cluster_9724,EUPSC_cluster_23820,EUPSC_cluster_13511,EUPSC_cluster_11079,EUPSC_cluster_670	PF13499 EF-hand domain pair-PF13499 EF-hand domain pair; ; ; PF00255 Glutathione peroxidase; PF00004 ATPase family associated with various cellular activities (AAA)-PF05362 Lon protease (S16) C-terminal proteolytic domain-PF02190 ATP-dependent protease La (LON) substrate-binding domain
13874	EUPSC	2566(OCTBI)	CALMI,OCTBI,EUPSC	Lachesis_group6__62_contigs__length_156955521:2216604..2361330	144726	EUPSC_cluster_1093,EUPSC_cluster_10761,EUPSC_cluster_1818	PF00400 WD domain, G-beta repeat-PF00400 WD domain, G-beta repeat; PF11315 Mediator complex subunit 30; PF11779 Small subunit of serine palmitoyltransferase-like
3865	CALMI	3774(OCTBI)	EUPSC,CALMI,OCTBI	oct006893F:102210..172723	70513	CALMI_Omin013598p,CALMI_Omin013597p,CALMI_Omin013599p
14335	OCTBI	14334(EUPSC)	EUPSC,OCTBI	KQ420911:16606..89353	72747	OCTBI_Ocbimv22030154m.p,OCTBI_Ocbimv22030155m.p,OCTBI_Ocbimv22030156m.p,OCTBI_Ocbimv22030157m.p
14458	OCTBI	14459(EUPSC)	EUPSC,OCTBI	KQ419878:35528..245329	209801	OCTBI_Ocbimv22025659m.p,OCTBI_Ocbimv22025660m.p,OCTBI_Ocbimv22025661m.p,OCTBI_Ocbimv22025664m.p
4339	EUPSC	3537(CALMI),3174(OCTBI)	OCTBI,CALMI,EUPSC	Lachesis_group25__42_contigs__length_94613958:56123542..56471614	348072	EUPSC_cluster_29227,EUPSC_cluster_27094,EUPSC_cluster_27093,EUPSC_cluster_27095,EUPSC_cluster_10074,EUPSC_cluster_10897	PF09805 Nucleolar protein 12 (25kDa); ; PF10263 SprT-like family; PF01266 FAD dependent oxidoreductase; PF13637 Ankyrin repeats (many copies)-PF12796 Ankyrin repeats (3 copies)-PF12796 Ankyrin repeats (3 copies)-PF12796 Ankyrin repeats (3 copies)-PF12796 Ankyrin repeats (3 copies)-PF07525 SOCS box; PF12796 Ankyrin repeats (3 copies)-PF13637 Ankyrin repeats (many copies)-PF07525 SOCS box
2573	OCTBI	2574(CALMI),14033(EUPSC)	EUPSC,OCTBI,CALMI	KQ417793:9120..330490	321370	OCTBI_Ocbimv22011465m.p,OCTBI_Ocbimv22011467m.p,OCTBI_Ocbimv22011468m.p,OCTBI_Ocbimv22011470m.p,OCTBI_Ocbimv22011472m.p,OCTBI_Ocbimv22011473m.p
13958	OCTBI	13957(EUPSC)	EUPSC,OCTBI	KQ427207:46821..75512	28691	OCTBI_Ocbimv22010018m.p,OCTBI_Ocbimv22010019m.p,OCTBI_Ocbimv22010020m.p
2656	OCTBI	2657(CALMI)	CALMI,OCTBI	KQ416432:66124..102438	36314	OCTBI_Ocbimv22032481m.p,OCTBI_Ocbimv22032482m.p,OCTBI_Ocbimv22032483m.p
4139	EUPSC	2723(OCTBI)	CALMI,OCTBI,EUPSC	Lachesis_group11__73_contigs__length_131769366:42252446..43157004	904558	EUPSC_cluster_28095,EUPSC_cluster_11445,EUPSC_cluster_13955,EUPSC_cluster_28322,EUPSC_cluster_2294,EUPSC_cluster_28098,EUPSC_cluster_1730,EUPSC_cluster_9812,EUPSC_cluster_8203	PF00664 ABC transporter transmembrane region-PF00664 ABC transporter transmembrane region-PF00665 Integrase core domain-PF00005 ABC transporter-PF00005 ABC transporter; PF03364 Polyketide cyclase / dehydrase and lipid transport; PF05147 Lanthionine synthetase C-like protein; PF00005 ABC transporter-PF00005 ABC transporter-PF00664 ABC transporter transmembrane region-PF00664 ABC transporter transm…
14519	OCTBI	14520(EUPSC)	EUPSC,OCTBI	KQ417980:101876..302451	200575	OCTBI_Ocbimv22013087m.p,OCTBI_Ocbimv22013090m.p,OCTBI_Ocbimv22013091m.p
3460	OCTBI	4498(EUPSC),3461(CALMI)	EUPSC,CALMI,OCTBI	KQ424142:228..246370	246142	OCTBI_Ocbimv22000973m.p,OCTBI_Ocbimv22000979m.p,OCTBI_Ocbimv22000983m.p
13825	OCTBI	13826(EUPSC)	EUPSC,OCTBI	KQ416923:138359..245878	107519	OCTBI_Ocbimv22001344m.p,OCTBI_Ocbimv22001345m.p,OCTBI_Ocbimv22001347m.p
2520	OCTBI	2521(CALMI)	OCTBI,CALMI	KQ418176:668130..708404	40274	OCTBI_Ocbimv22014767m.p,OCTBI_Ocbimv22014768m.p,OCTBI_Ocbimv22014770m.p
2507	OCTBI	2058(CALMI)	OCTBI,CALMI	KQ429904:16394..90781	74387	OCTBI_Ocbimv22016504m.p,OCTBI_Ocbimv22016506m.p,OCTBI_Ocbimv22016507m.p,OCTBI_Ocbimv22016508m.p,OCTBI_Ocbimv22016509m.p
3393	OCTBI	2720(CALMI)	CALMI,OCTBI	KQ428720:26520..110855	84335	OCTBI_Ocbimv22014010m.p,OCTBI_Ocbimv22014011m.p,OCTBI_Ocbimv22014013m.p,OCTBI_Ocbimv22014014m.p
3443	CALMI	3442(OCTBI)	CALMI,OCTBI,EUPSC	oct004783F:3983..256532	252549	CALMI_Omin001993p,CALMI_Omin001997p,CALMI_Omin001998p,CALMI_Omin001999p,CALMI_Omin001996p,CALMI_Omin001994p
3548	OCTBI	3547(CALMI)	OCTBI,CALMI	KQ423995:388333..483803	95470	OCTBI_Ocbimv22000557m.p,OCTBI_Ocbimv22000558m.p,OCTBI_Ocbimv22000559m.p
2488	OCTBI	2487(CALMI)	CALMI,OCTBI	KQ416468:171..146628	146457	OCTBI_Ocbimv22033130m.p,OCTBI_Ocbimv22033131m.p,OCTBI_Ocbimv22033134m.p
3709	CALMI	3710(OCTBI)	OCTBI,CALMI	oct011969F:446..88115	87669	CALMI_Omin025370p,CALMI_Omin025369p,CALMI_Omin025367p
14562	OCTBI	14563(EUPSC)	EUPSC,OCTBI	KQ415776:32180..231630	199450	OCTBI_Ocbimv22000309m.p,OCTBI_Ocbimv22000312m.p,OCTBI_Ocbimv22000313m.p
14117	EUPSC	14118(OCTBI)	OCTBI,EUPSC	Lachesis_group0__68_contigs__length_203855924:128263473..128426786	163313	EUPSC_cluster_7952,EUPSC_cluster_9163,EUPSC_cluster_2750	PF00397 WW domain-PF12237 Phosphorylated CTD interacting factor 1 WW domain; PF12640 UPF0489 domain; PF06480 FtsH Extracellular-PF00004 ATPase family associated with various cellular activities (AAA)-PF01434 Peptidase family M41
3502	CALMI	2996(OCTBI)	CALMI,OCTBI	oct016268F:7624..82067	74443	CALMI_Omin019281p,CALMI_Omin019282p,CALMI_Omin019283p,CALMI_Omin019284p
14568	EUPSC	14569(OCTBI)	OCTBI,EUPSC	Lachesis_group35__42_contigs__length_70637049:8556750..8615030	58280	EUPSC_cluster_20602,EUPSC_cluster_4999,EUPSC_cluster_11799	PF00004 ATPase family associated with various cellular activities (AAA); PF00169 PH domain; PF00169 PH domain
3288	OCTBI	3289(CALMI)	OCTBI,CALMI	KQ419484:38774..99981	61207	OCTBI_Ocbimv22023820m.p,OCTBI_Ocbimv22023822m.p,OCTBI_Ocbimv22023824m.p
2962	CALMI	2631(OCTBI),4370(EUPSC)	EUPSC,CALMI,OCTBI	oct000129F:601284..828112	226828	CALMI_Omin006866p,CALMI_Omin006860p,CALMI_Omin006862p,CALMI_Omin006858p,CALMI_Omin006864p
3755	OCTBI	3754(CALMI)	CALMI,OCTBI	KQ419376:649426..677090	27664	OCTBI_Ocbimv22023226m.p,OCTBI_Ocbimv22023227m.p,OCTBI_Ocbimv22023228m.p
3379	CALMI	3378(OCTBI)	CALMI,OCTBI	oct002494F:22189..231250	209061	CALMI_Omin009872p,CALMI_Omin009875p,CALMI_Omin009874p,CALMI_Omin009873p
14239	OCTBI	4141(EUPSC)	EUPSC,OCTBI,CALMI	KQ419133:2856..118705	115849	OCTBI_Ocbimv22021922m.p,OCTBI_Ocbimv22021924m.p,OCTBI_Ocbimv22021926m.p
14287	OCTBI	14288(EUPSC)	OCTBI,EUPSC	KQ417337:6657..208691	202034	OCTBI_Ocbimv22006615m.p,OCTBI_Ocbimv22006619m.p,OCTBI_Ocbimv22006624m.p
3189	OCTBI	13974(EUPSC)	OCTBI,EUPSC	KQ415893:386386..914074	527688	OCTBI_Ocbimv22011816m.p,OCTBI_Ocbimv22011819m.p,OCTBI_Ocbimv22011823m.p,OCTBI_Ocbimv22011822m.p,OCTBI_Ocbimv22011824m.p,OCTBI_Ocbimv22011810m.p,OCTBI_Ocbimv22011813m.p,OCTBI_Ocbimv22011825m.p
3738	CALMI	3106(OCTBI)	CALMI,OCTBI	oct011317F:46227..91215	44988	CALMI_Omin027336p,CALMI_Omin027338p,CALMI_Omin027337p
4255	EUPSC	3386(OCTBI),14433(OCTBI)	EUPSC,OCTBI,CALMI	Lachesis_group10__55_contigs__length_138218214:24780624..26526671	1746047	EUPSC_cluster_4737,EUPSC_cluster_6420,EUPSC_cluster_4514,EUPSC_cluster_28769,EUPSC_cluster_28768,EUPSC_cluster_28767,EUPSC_cluster_14429,EUPSC_cluster_3834,EUPSC_cluster_5778	; ; ; PF00028 Cadherin domain-PF00028 Cadherin domain-PF00028 Cadherin domain; ; PF13901 Putative zinc-RING and/or ribbon-PF02759 RUN domain; ; PF09445 RNA cap guanine-N2 methyltransferase; PF07647 SAM domain (Sterile alpha motif)
3444	OCTBI	3445(CALMI),4269(EUPSC)	EUPSC,CALMI,OCTBI	KQ419694:86083..147507	61424	OCTBI_Ocbimv22025105m.p,OCTBI_Ocbimv22025106m.p,OCTBI_Ocbimv22025108m.p,OCTBI_Ocbimv22025109m.p,OCTBI_Ocbimv22025110m.p
2945	CALMI	2946(OCTBI)	CALMI,OCTBI	oct001468F:179874..313923	134049	CALMI_Omin003369p,CALMI_Omin003372p,CALMI_Omin003371p,CALMI_Omin003368p
3394	CALMI	3395(OCTBI)	OCTBI,CALMI	oct020183F:7615..69524	61909	CALMI_Omin019434p,CALMI_Omin019435p,CALMI_Omin019433p
2701	OCTBI	2700(CALMI)	CALMI,OCTBI	KQ422887:76333..209996	133663	OCTBI_Ocbimv22036873m.p,OCTBI_Ocbimv22036874m.p,OCTBI_Ocbimv22036878m.p
14240	EUPSC	14241(OCTBI)	OCTBI,EUPSC	Lachesis_group14__44_contigs__length_129294686:71286815..71333936	47121	EUPSC_cluster_19855,EUPSC_cluster_19852,EUPSC_cluster_19848	PF00211 Adenylate and Guanylate cyclase catalytic domain-PF01094 Receptor family ligand binding region-PF07714 Protein tyrosine kinase; PF07714 Protein tyrosine kinase; PF00211 Adenylate and Guanylate cyclase catalytic domain
4142	CALMI	4141(EUPSC)	EUPSC,CALMI,OCTBI	oct000470F:73541..170795	97254	CALMI_Omin000937p,CALMI_Omin000940p,CALMI_Omin000941p
2847	OCTBI	3926(CALMI),2846(CALMI),3681(CALMI),3665(CALMI),3899(CALMI),3587(CALMI),3270(CALMI),2848(CALMI)	CALMI,OCTBI	KQ422438:29082..254209	225127	OCTBI_Ocbimv22035564m.p,OCTBI_Ocbimv22035565m.p,OCTBI_Ocbimv22035566m.p,OCTBI_Ocbimv22035567m.p,OCTBI_Ocbimv22035568m.p,OCTBI_Ocbimv22035561m.p,OCTBI_Ocbimv22035569m.p,OCTBI_Ocbimv22035570m.p,OCTBI_Ocbimv22035571m.p
3194	OCTBI	3193(CALMI)	CALMI,OCTBI	KQ421583:35..26093	26058	OCTBI_Ocbimv22032552m.p,OCTBI_Ocbimv22032553m.p,OCTBI_Ocbimv22032554m.p,OCTBI_Ocbimv22032555m.p
4492	EUPSC	3787(CALMI)	EUPSC,CALMI,OCTBI	Lachesis_group6__62_contigs__length_156955521:91031262..91098870	67608	EUPSC_cluster_11472,EUPSC_cluster_7446,EUPSC_cluster_11040	PF06003 Survival motor neuron protein (SMN); PF00515 Tetratricopeptide repeat; PF13896 Glycosyl-transferase for dystroglycan
3808	OCTBI	3809(CALMI)	CALMI,OCTBI	KQ424157:167271..296965	129694	OCTBI_Ocbimv22001017m.p,OCTBI_Ocbimv22001020m.p,OCTBI_Ocbimv22001023m.p
4342	EUPSC	3005(OCTBI),3004(CALMI)	CALMI,OCTBI,EUPSC	Lachesis_group4__56_contigs__length_174030884:144100495..144318106	217611	EUPSC_cluster_7032,EUPSC_cluster_18331,EUPSC_cluster_18332,EUPSC_cluster_12330,EUPSC_cluster_623	PF03372 Endonuclease/Exonuclease/phosphatase family; ; ; PF00068 Phospholipase A2; PF03441 FAD binding domain of DNA photolyase-PF00875 DNA photolyase
11393	OCTBI	11522(EUPSC)	EUPSC,OCTBI	KQ418216:326157..700859	374702	OCTBI_Ocbimv22015255m.p,OCTBI_Ocbimv22015256m.p,OCTBI_Ocbimv22015258m.p,OCTBI_Ocbimv22015262m.p,OCTBI_Ocbimv22015264m.p,OCTBI_Ocbimv22015266m.p,OCTBI_Ocbimv22015267m.p
3746	CALMI	3745(OCTBI)	OCTBI,CALMI	oct010241F:1106..115000	113894	CALMI_Omin024387p,CALMI_Omin024388p,CALMI_Omin024389p
2662	OCTBI	2663(CALMI)	OCTBI,CALMI	KQ423995:256363..358296	101933	OCTBI_Ocbimv22000552m.p,OCTBI_Ocbimv22000554m.p,OCTBI_Ocbimv22000555m.p
3389	OCTBI	4354(EUPSC),3390(CALMI),3692(CALMI)	EUPSC,OCTBI,CALMI	KQ421731:35808..339929	304121	OCTBI_Ocbimv22033111m.p,OCTBI_Ocbimv22033112m.p,OCTBI_Ocbimv22033113m.p,OCTBI_Ocbimv22033115m.p,OCTBI_Ocbimv22033117m.p,OCTBI_Ocbimv22033120m.p,OCTBI_Ocbimv22033122m.p,OCTBI_Ocbimv22033124m.p
2574	CALMI	2573(OCTBI)	EUPSC,CALMI,OCTBI	oct008244F:249..153167	152918	CALMI_Omin015120p,CALMI_Omin015119p,CALMI_Omin015116p,CALMI_Omin015118p
3797	CALMI	3796(OCTBI)	OCTBI,CALMI	oct001324F:47383..449317	401934	CALMI_Omin000264p,CALMI_Omin000269p,CALMI_Omin000267p,CALMI_Omin000271p,CALMI_Omin000265p,CALMI_Omin000270p
2831	OCTBI	4293(EUPSC),2364(CALMI)	EUPSC,OCTBI,CALMI	KQ422894:10125..350519	340394	OCTBI_Ocbimv22036893m.p,OCTBI_Ocbimv22036895m.p,OCTBI_Ocbimv22036896m.p,OCTBI_Ocbimv22036897m.p,OCTBI_Ocbimv22036898m.p,OCTBI_Ocbimv22036902m.p,OCTBI_Ocbimv22036904m.p,OCTBI_Ocbimv22036908m.p,OCTBI_Ocbimv22036906m.p,OCTBI_Ocbimv22036894m.p
14345	OCTBI	14346(EUPSC)	OCTBI,EUPSC	KQ421389:166992..499058	332066	OCTBI_Ocbimv22031952m.p,OCTBI_Ocbimv22031955m.p,OCTBI_Ocbimv22031958m.p,OCTBI_Ocbimv22031959m.p
3005	OCTBI	3004(CALMI),4342(EUPSC)	EUPSC,CALMI,OCTBI	KQ415803:570419..701214	130795	OCTBI_Ocbimv22004371m.p,OCTBI_Ocbimv22004372m.p,OCTBI_Ocbimv22004373m.p,OCTBI_Ocbimv22004374m.p,OCTBI_Ocbimv22004375m.p,OCTBI_Ocbimv22004376m.p
4308	EUPSC	4307(CALMI)	EUPSC,CALMI	Lachesis_group1__63_contigs__length_187967259:62799389..62875296	75907	EUPSC_cluster_8044,EUPSC_cluster_3190,EUPSC_cluster_13596,EUPSC_cluster_28296,EUPSC_cluster_8836,EUPSC_cluster_28295	PF01145 SPFH domain / Band 7 family-PF11214 Mediator complex subunit 2; PF02146 Sir2 family; PF02146 Sir2 family; ; ; PF06978 Ribonucleases P/MRP protein subunit POP1-PF06978 Ribonucleases P/MRP protein subunit POP1-PF08170 POPLD (NUC188) domain
3842	CALMI	3843(OCTBI)	CALMI,OCTBI,EUPSC	oct010348F:16020..130786	114766	CALMI_Omin025351p,CALMI_Omin025352p,CALMI_Omin025353p
3222	OCTBI	3606(CALMI),3223(CALMI)	CALMI,OCTBI	KQ418660:57139..116376	59237	OCTBI_Ocbimv22018716m.p,OCTBI_Ocbimv22018720m.p,OCTBI_Ocbimv22018723m.p
2902	CALMI	2901(OCTBI)	CALMI,OCTBI	oct002056F:7426..148359	140933	CALMI_Omin000727p,CALMI_Omin000725p,CALMI_Omin000723p
3713	OCTBI	3714(CALMI)	CALMI,OCTBI	KQ415827:33604..94065	60461	OCTBI_Ocbimv22005989m.p,OCTBI_Ocbimv22005990m.p,OCTBI_Ocbimv22005991m.p
3674	OCTBI	13879(EUPSC),3675(CALMI)	OCTBI,CALMI,EUPSC	KQ419056:106902..208113	101211	OCTBI_Ocbimv22021480m.p,OCTBI_Ocbimv22021481m.p,OCTBI_Ocbimv22021482m.p,OCTBI_Ocbimv22021483m.p,OCTBI_Ocbimv22021486m.p
3562	OCTBI	3561(CALMI)	EUPSC,CALMI,OCTBI	KQ424712:76701..117769	41068	OCTBI_Ocbimv22002590m.p,OCTBI_Ocbimv22002591m.p,OCTBI_Ocbimv22002592m.p
3769	OCTBI	3768(CALMI)	CALMI,OCTBI	KQ417438:548293..654371	106078	OCTBI_Ocbimv22007620m.p,OCTBI_Ocbimv22007622m.p,OCTBI_Ocbimv22007624m.p
14257	EUPSC	14258(OCTBI)	EUPSC,OCTBI	Lachesis_group26__46_contigs__length_93059273:34405856..35114969	709113	EUPSC_cluster_24830,EUPSC_cluster_13468,EUPSC_cluster_391	; PF00400 WD domain, G-beta repeat-PF00400 WD domain, G-beta repeat; PF00069 Protein kinase domain
14310	EUPSC	6612(OCTBI)	EUPSC,OCTBI	Lachesis_group5__70_contigs__length_158228327:34624998..35186293	561295	EUPSC_cluster_13208,EUPSC_cluster_5857,EUPSC_cluster_1256,EUPSC_cluster_15867	PF12937 F-box-like; PF12540 Protein of unknown function (DUF3736); PF00293 NUDIX domain-PF11788 39S mitochondrial ribosomal protein L46-PF00078 Reverse transcriptase (RNA-dependent DNA polymerase); PF00097 Zinc finger, C3HC4 type (RING finger)-PF02176 TRAF-type zinc finger
3735	OCTBI	3734(CALMI)	CALMI,OCTBI	KQ422416:141649..325234	183585	OCTBI_Ocbimv22035514m.p,OCTBI_Ocbimv22035516m.p,OCTBI_Ocbimv22035518m.p,OCTBI_Ocbimv22035519m.p
2567	CALMI	2566(OCTBI)	OCTBI,CALMI,EUPSC	oct002476F:1060..111603	110543	CALMI_Omin008734p,CALMI_Omin008730p,CALMI_Omin008733p,CALMI_Omin008732p
2948	CALMI	2949(OCTBI)	CALMI,OCTBI	oct004007F:6645..90180	83535	CALMI_Omin005547p,CALMI_Omin005550p,CALMI_Omin005548p
3427	CALMI	3428(OCTBI),4286(EUPSC),4441(EUPSC)	CALMI,OCTBI,EUPSC	oct000971F:2453..404290	401837	CALMI_Omin008324p,CALMI_Omin008328p,CALMI_Omin008327p,CALMI_Omin008329p,CALMI_Omin008326p,CALMI_Omin008325p
4269	EUPSC	3444(OCTBI),3445(CALMI)	OCTBI,CALMI,EUPSC	Lachesis_group12__46_contigs__length_133395132:74365903..74442824	76921	EUPSC_cluster_12245,EUPSC_cluster_8819,EUPSC_cluster_4218	PF04176 TIP41-like family; PF02269 Transcription initiation factor IID, 18kD subunit; PF12240 Angiomotin C terminal
3907	CALMI	3906(OCTBI)	OCTBI,CALMI	oct002306F:177812..349728	171916	CALMI_Omin006638p,CALMI_Omin006632p,CALMI_Omin006636p
3920	CALMI	3919(OCTBI)	CALMI,OCTBI	oct007435F:7760..167260	159500	CALMI_Omin012306p,CALMI_Omin012305p,CALMI_Omin012304p,CALMI_Omin012307p
3326	OCTBI	3325(CALMI)	CALMI,OCTBI	KQ427571:13651..219669	206018	OCTBI_Ocbimv22010961m.p,OCTBI_Ocbimv22010963m.p,OCTBI_Ocbimv22010964m.p,OCTBI_Ocbimv22010967m.p
13970	OCTBI	13971(EUPSC)	OCTBI,EUPSC	KQ417439:11700..215349	203649	OCTBI_Ocbimv22007640m.p,OCTBI_Ocbimv22007644m.p,OCTBI_Ocbimv22007645m.p,OCTBI_Ocbimv22007647m.p
4213	EUPSC	3192(CALMI),3320(OCTBI)	CALMI,OCTBI,EUPSC	Lachesis_group5__70_contigs__length_158228327:55191932..56188643	996711	EUPSC_cluster_7269,EUPSC_cluster_4710,EUPSC_cluster_1965,EUPSC_cluster_11843,EUPSC_cluster_9390,EUPSC_cluster_2072,EUPSC_cluster_13060,EUPSC_cluster_7916	PF00814 Glycoprotease family; PF08285 Dolichol-phosphate mannosyltransferase subunit 3 (DPM3)-PF00133 tRNA synthetases class I (I, L, M and V)-PF00133 tRNA synthetases class I (I, L, M and V)-PF00133 tRNA synthetases class I (I, L, M and V)-PF08264 Anticodon-binding domain of tRNA; PF00104 Ligand-binding domain of nuclear hormone receptor-PF00105 Zinc finger, C4 type (two domains); ; ; PF07531 NH…
2824	CALMI	2823(OCTBI)	CALMI,OCTBI	oct010589F:59..28804	28745	CALMI_Omin026413p,CALMI_Omin026414p,CALMI_Omin026415p
3684	OCTBI	3685(CALMI)	OCTBI,CALMI	KQ416568:4153..138007	133854	OCTBI_Ocbimv22035018m.p,OCTBI_Ocbimv22035019m.p,OCTBI_Ocbimv22035022m.p,OCTBI_Ocbimv22035023m.p
14215	EUPSC	14214(OCTBI)	EUPSC,OCTBI	Lachesis_group30__51_contigs__length_87052432:23874998..24233813	358815	EUPSC_cluster_21026,EUPSC_cluster_2279,EUPSC_cluster_21028	PF00110 wnt family; PF01424 R3H domain; PF07883 Cupin domain
3126	OCTBI	3125(CALMI)	OCTBI,CALMI	KQ419605:202251..324308	122057	OCTBI_Ocbimv22024627m.p,OCTBI_Ocbimv22024628m.p,OCTBI_Ocbimv22024630m.p,OCTBI_Ocbimv22024631m.p,OCTBI_Ocbimv22024632m.p
3805	CALMI	4259(EUPSC),3806(OCTBI)	EUPSC,CALMI,OCTBI	oct005829F:927..211436	210509	CALMI_Omin012607p,CALMI_Omin012608p,CALMI_Omin012604p,CALMI_Omin012606p,CALMI_Omin012609p,CALMI_Omin012605p
2936	CALMI	2935(OCTBI),4185(EUPSC)	OCTBI,CALMI,EUPSC	oct000552F:178284..641703	463419	CALMI_Omin002069p,CALMI_Omin002072p,CALMI_Omin002071p,CALMI_Omin002074p,CALMI_Omin002075p,CALMI_Omin002073p,CALMI_Omin002068p
2991	CALMI	2990(OCTBI)	CALMI,OCTBI	oct013918F:8301..72593	64292	CALMI_Omin024652p,CALMI_Omin024650p,CALMI_Omin024649p
3042	CALMI	3041(OCTBI)	EUPSC,CALMI,OCTBI	oct002640F:100058..286736	186678	CALMI_Omin000525p,CALMI_Omin000522p,CALMI_Omin000521p,CALMI_Omin000523p
3008	OCTBI	3007(CALMI)	OCTBI,CALMI	KQ417972:14702..190184	175482	OCTBI_Ocbimv22013005m.p,OCTBI_Ocbimv22013010m.p,OCTBI_Ocbimv22013011m.p,OCTBI_Ocbimv22013004m.p
2851	CALMI	4414(EUPSC),2850(OCTBI)	CALMI,OCTBI,EUPSC	oct001711F:22532..357796	335264	CALMI_Omin004364p,CALMI_Omin004363p,CALMI_Omin004362p,CALMI_Omin004366p,CALMI_Omin004361p,CALMI_Omin004367p
14506	EUPSC	2643(OCTBI)	CALMI,OCTBI,EUPSC	Lachesis_group4__56_contigs__length_174030884:134364812..134795428	430616	EUPSC_cluster_16944,EUPSC_cluster_11055,EUPSC_cluster_8251,EUPSC_cluster_16946	PF14712 Snapin/Pallidin; PF04051 Transport protein particle (TRAPP) component; PF08686 PLAC (protease and lacunin) domain-PF01562 Reprolysin family propeptide-PF05986 ADAM-TS Spacer 1-PF00090 Thrombospondin type 1 domain-PF00090 Thrombospondin type 1 domain-PF00090 Thrombospondin type 1 domain; PF13855 Leucine rich repeat-PF13855 Leucine rich repeat
2468	CALMI	4344(EUPSC),2467(OCTBI)	OCTBI,CALMI,EUPSC	oct003212F:28586..306921	278335	CALMI_Omin008183p,CALMI_Omin008184p,CALMI_Omin008180p,CALMI_Omin008181p
2519	CALMI	2518(OCTBI),4290(EUPSC)	EUPSC,OCTBI,CALMI	oct014280F:2968..76708	73740	CALMI_Omin024563p,CALMI_Omin024564p,CALMI_Omin024562p
3268	OCTBI	3157(CALMI)	CALMI,OCTBI	KQ427949:359398..420253	60855	OCTBI_Ocbimv22011922m.p,OCTBI_Ocbimv22011924m.p,OCTBI_Ocbimv22011925m.p
13799	OCTBI	13800(EUPSC)	EUPSC,OCTBI	KQ418832:182410..640646	458236	OCTBI_Ocbimv22019883m.p,OCTBI_Ocbimv22019887m.p,OCTBI_Ocbimv22019888m.p,OCTBI_Ocbimv22019895m.p,OCTBI_Ocbimv22019898m.p
2563	CALMI	2562(OCTBI)	CALMI,OCTBI,EUPSC	oct005354F:53770..138678	84908	CALMI_Omin015293p,CALMI_Omin015290p,CALMI_Omin015294p,CALMI_Omin015291p
2540	CALMI	2541(OCTBI)	OCTBI,CALMI	oct001420F:61455..409578	348123	CALMI_Omin002696p,CALMI_Omin002697p,CALMI_Omin002694p,CALMI_Omin002695p,CALMI_Omin002699p
2982	OCTBI	4172(EUPSC),2983(CALMI),3756(CALMI)	EUPSC,CALMI,OCTBI	KQ415693:289838..421785	131947	OCTBI_Ocbimv22024388m.p,OCTBI_Ocbimv22024390m.p,OCTBI_Ocbimv22024391m.p,OCTBI_Ocbimv22024392m.p,OCTBI_Ocbimv22024394m.p,OCTBI_Ocbimv22024395m.p
4185	EUPSC	2936(CALMI),2935(OCTBI)	EUPSC,CALMI,OCTBI	Lachesis_group32__40_contigs__length_78634074:68141559..68940700	799141	EUPSC_cluster_20082,EUPSC_cluster_20081,EUPSC_cluster_8266,EUPSC_cluster_20079,EUPSC_cluster_14248,EUPSC_cluster_8643,EUPSC_cluster_20078,EUPSC_cluster_20077,EUPSC_cluster_20076	PF00410 Ribosomal protein S8; PF13772 AIG2-like family; PF00226 DnaJ domain-PF09320 Domain of unknown function (DUF1977); ; PF04676 Protein similar to CwfJ C-terminus 2-PF04677 Protein similar to CwfJ C-terminus 1; PF10204 Dual oxidase maturation factor; PF03098 Animal haem peroxidase; ; PF08030 Ferric reductase NAD binding domain-PF08022 FAD-binding domain
14430	EUPSC	14429(OCTBI)	OCTBI,EUPSC	Lachesis_group20__56_contigs__length_105542877:82610480..82802327	191847	EUPSC_cluster_17884,EUPSC_cluster_2582,EUPSC_cluster_17885	PF00096 Zinc finger, C2H2 type-PF00096 Zinc finger, C2H2 type-PF00096 Zinc finger, C2H2 type-PF00096 Zinc finger, C2H2 type; PF00096 Zinc finger, C2H2 type-PF00096 Zinc finger, C2H2 type-PF00096 Zinc finger, C2H2 type-PF00096 Zinc finger, C2H2 type-PF00096 Zinc finger, C2H2 type-PF00096 Zinc finger, C2H2 type-PF00096 Zinc finger, C2H2 type-PF00096 Zinc finger, C2H2 type; PF00096 Zinc finger, C2H2…
3528	OCTBI	3527(CALMI),14559(EUPSC)	EUPSC,OCTBI,CALMI	KQ417101:188098..346594	158496	OCTBI_Ocbimv22003700m.p,OCTBI_Ocbimv22003701m.p,OCTBI_Ocbimv22003702m.p,OCTBI_Ocbimv22003703m.p,OCTBI_Ocbimv22003705m.p,OCTBI_Ocbimv22003706m.p,OCTBI_Ocbimv22003707m.p
13930	EUPSC	13931(OCTBI)	EUPSC,OCTBI	Lachesis_group39__38_contigs__length_50967332:47803664..48578967	775303	EUPSC_cluster_16962,EUPSC_cluster_16959,EUPSC_cluster_6954	; PF16054 Transmembrane protein family 72; PF00069 Protein kinase domain
4217	EUPSC	3622(OCTBI),3623(CALMI)	OCTBI,CALMI,EUPSC	Lachesis_group35__42_contigs__length_70637049:21191962..22355906	1163944	EUPSC_cluster_8287,EUPSC_cluster_6990,EUPSC_cluster_3898,EUPSC_cluster_15339,EUPSC_cluster_3899,EUPSC_cluster_6345,EUPSC_cluster_1540,EUPSC_cluster_1888,EUPSC_cluster_7833,EUPSC_cluster_7302	PF06862 Utp25, U3 small nucleolar RNA-associated SSU processome protein 25-PF06862 Utp25, U3 small nucleolar RNA-associated SSU processome protein 25; PF02221 ML domain; PF03372 Endonuclease/Exonuclease/phosphatase family; ; PF10170 Cysteine-rich domain; PF07653 Variant SH3 domain-PF02828 L27 domain-PF00595 PDZ domain (Also known as DHR or GLGF)-PF00625 Guanylate kinase; PF05008 Vesicle transport…
2816	CALMI	2817(OCTBI)	CALMI,OCTBI,EUPSC	oct015075F:27800..99628	71828	CALMI_Omin025712p,CALMI_Omin025713p,CALMI_Omin025714p
4412	EUPSC	3826(CALMI)	CALMI,OCTBI,EUPSC	Lachesis_group29__46_contigs__length_89259793:57811114..58084406	273292	EUPSC_cluster_7272,EUPSC_cluster_6443,EUPSC_cluster_28879	PF00568 WH1 domain-PF00254 FKBP-type peptidyl-prolyl cis-trans isomerase; PF02752 Arrestin (or S-antigen), C-terminal domain-PF00339 Arrestin (or S-antigen), N-terminal domain;
3480	OCTBI	3481(CALMI)	OCTBI,CALMI	KQ420118:350..40798	40448	OCTBI_Ocbimv22026800m.p,OCTBI_Ocbimv22026801m.p,OCTBI_Ocbimv22026802m.p
3114	OCTBI	3113(CALMI)	OCTBI,CALMI	KQ416739:256..221977	221721	OCTBI_Ocbimv22038403m.p,OCTBI_Ocbimv22038404m.p,OCTBI_Ocbimv22038405m.p,OCTBI_Ocbimv22038406m.p,OCTBI_Ocbimv22038407m.p,OCTBI_Ocbimv22038408m.p,OCTBI_Ocbimv22038409m.p
3078	CALMI	3077(OCTBI)	OCTBI,CALMI	oct005924F:38610..81286	42676	CALMI_Omin014410p,CALMI_Omin014414p,CALMI_Omin014412p
3717	OCTBI	4386(EUPSC),3718(CALMI),14008(EUPSC)	OCTBI,CALMI,EUPSC	KQ418303:794098..1138556	344458	OCTBI_Ocbimv22015922m.p,OCTBI_Ocbimv22015923m.p,OCTBI_Ocbimv22015928m.p,OCTBI_Ocbimv22015929m.p,OCTBI_Ocbimv22015933m.p
13949	OCTBI	13948(EUPSC)	EUPSC,OCTBI	KQ424463:3781..193198	189417	OCTBI_Ocbimv22001896m.p,OCTBI_Ocbimv22001898m.p,OCTBI_Ocbimv22001899m.p,OCTBI_Ocbimv22001900m.p,OCTBI_Ocbimv22001901m.p,OCTBI_Ocbimv22001902m.p
4375	EUPSC	4374(CALMI)	CALMI,EUPSC	Lachesis_group18__53_contigs__length_106174747:44970677..45090969	120292	EUPSC_cluster_21810,EUPSC_cluster_3674,EUPSC_cluster_12983	PF00406 Adenylate kinase; PF00271 Helicase conserved C-terminal domain-PF04408 Helicase associated domain (HA2)-PF00270 DEAD/DEAH box helicase-PF07717 Oligonucleotide/oligosaccharide-binding (OB)-fold;
14449	OCTBI	14450(EUPSC)	EUPSC,OCTBI	KQ421805:19742..98167	78425	OCTBI_Ocbimv22033409m.p,OCTBI_Ocbimv22033410m.p,OCTBI_Ocbimv22033411m.p
13881	OCTBI	13880(EUPSC)	OCTBI,EUPSC	KQ419616:248253..327904	79651	OCTBI_Ocbimv22024699m.p,OCTBI_Ocbimv22024701m.p,OCTBI_Ocbimv22024702m.p,OCTBI_Ocbimv22024703m.p
3885	OCTBI	3886(CALMI),13959(EUPSC)	CALMI,OCTBI,EUPSC	KQ415932:665886..1224404	558518	OCTBI_Ocbimv22014515m.p,OCTBI_Ocbimv22014517m.p,OCTBI_Ocbimv22014519m.p,OCTBI_Ocbimv22014520m.p,OCTBI_Ocbimv22014524m.p,OCTBI_Ocbimv22014525m.p
2625	CALMI	2624(OCTBI)	OCTBI,CALMI	oct008818F:2534..42897	40363	CALMI_Omin010466p,CALMI_Omin010465p,CALMI_Omin010468p
3314	CALMI	3315(OCTBI)	CALMI,OCTBI	oct002072F:179482..275947	96465	CALMI_Omin000258p,CALMI_Omin000259p,CALMI_Omin000261p
1274	EUPSC	3000(OCTBI)	EUPSC,OCTBI,CALMI	Lachesis_group27__44_contigs__length_93323795:11268957..12242673	973716	EUPSC_cluster_6502,EUPSC_cluster_10970,EUPSC_cluster_5964,EUPSC_cluster_5591,EUPSC_cluster_23506,EUPSC_cluster_8074,EUPSC_cluster_29191,EUPSC_cluster_11163,EUPSC_cluster_23507,EUPSC_cluster_6847	PF16320 Ribosomal protein L7/L12 dimerisation domain-PF00542 Ribosomal protein L7/L12 C-terminal domain; PF03637 Mob1/phocein family; PF00076 RNA recognition motif. (a.k.a. RRM, RBD, or RNP domain)-PF00076 RNA recognition motif. (a.k.a. RRM, RBD, or RNP domain)-PF00076 RNA recognition motif. (a.k.a. RRM, RBD, or RNP domain); PF13833 EF-hand domain pair-PF13202 EF hand; PF02437 SKI/SNO/DAC family-…
3604	CALMI	3603(OCTBI)	OCTBI,CALMI	oct014846F:2638..57388	54750	CALMI_Omin024857p,CALMI_Omin024856p,CALMI_Omin024858p
14258	OCTBI	14257(EUPSC)	OCTBI,EUPSC	KQ419013:130681..278727	148046	OCTBI_Ocbimv22021213m.p,OCTBI_Ocbimv22021214m.p,OCTBI_Ocbimv22021217m.p,OCTBI_Ocbimv22021218m.p
3470	OCTBI	3471(CALMI),4181(EUPSC)	CALMI,OCTBI,EUPSC	KQ421368:12010..128601	116591	OCTBI_Ocbimv22031870m.p,OCTBI_Ocbimv22031871m.p,OCTBI_Ocbimv22031873m.p
3088	OCTBI	2980(CALMI)	CALMI,OCTBI	KQ421110:95929..176468	80539	OCTBI_Ocbimv22030840m.p,OCTBI_Ocbimv22030841m.p,OCTBI_Ocbimv22030842m.p,OCTBI_Ocbimv22030843m.p
3878	CALMI	3877(OCTBI)	CALMI,OCTBI	oct007171F:9868..66334	56466	CALMI_Omin014532p,CALMI_Omin014531p,CALMI_Omin014534p,CALMI_Omin014533p
14104	OCTBI	14103(EUPSC)	OCTBI,EUPSC	KQ422717:26241..161997	135756	OCTBI_Ocbimv22036340m.p,OCTBI_Ocbimv22036341m.p,OCTBI_Ocbimv22036343m.p
4481	EUPSC	2790(OCTBI),3124(CALMI)	CALMI,OCTBI,EUPSC	Lachesis_group14__44_contigs__length_129294686:92989956..93317976	328020	EUPSC_cluster_16202,EUPSC_cluster_2024,EUPSC_cluster_20031,EUPSC_cluster_91	PF01342 SAND domain; PF07690 Major Facilitator Superfamily; ; PF02460 Patched family-PF16414 Niemann-Pick C1 N terminus
3265	CALMI	3264(OCTBI)	CALMI,OCTBI	oct003340F:3155..67749	64594	CALMI_Omin000659p,CALMI_Omin000660p,CALMI_Omin000662p,CALMI_Omin000658p
14494	OCTBI	14495(EUPSC)	OCTBI,EUPSC	KQ417892:38698..99914	61216	OCTBI_Ocbimv22012229m.p,OCTBI_Ocbimv22012231m.p,OCTBI_Ocbimv22012232m.p
2504	OCTBI	2503(CALMI),4327(EUPSC)	EUPSC,OCTBI,CALMI	KQ422263:141269..209235	67966	OCTBI_Ocbimv22035060m.p,OCTBI_Ocbimv22035061m.p,OCTBI_Ocbimv22035064m.p
13994	EUPSC	13995(OCTBI)	EUPSC,OCTBI	Lachesis_group4__56_contigs__length_174030884:95566522..96216999	650477	EUPSC_cluster_2920,EUPSC_cluster_2385,EUPSC_cluster_11782	PF00271 Helicase conserved C-terminal domain-PF13907 Domain of unknown function (DUF4208)-PF00176 SNF2 family N-terminal domain-PF00385 Chromo (CHRromatin Organisation MOdifier) domain; PF00595 PDZ domain (Also known as DHR or GLGF)-PF00595 PDZ domain (Also known as DHR or GLGF)-PF00595 PDZ domain (Also known as DHR or GLGF);
4188	EUPSC	3791(OCTBI),4187(CALMI),3790(CALMI)	EUPSC,CALMI,OCTBI	Lachesis_group28__49_contigs__length_91470296:3126932..3246338	119406	EUPSC_cluster_5900,EUPSC_cluster_3465,EUPSC_cluster_18080,EUPSC_cluster_15031,EUPSC_cluster_8362	PF00106 short chain dehydrogenase; ; PF13639 Ring finger domain-PF02176 TRAF-type zinc finger; PF03143 Elongation factor Tu C-terminal domain-PF00009 Elongation factor Tu GTP binding domain-PF03144 Elongation factor Tu domain 2; PF00092 von Willebrand factor type A domain
3525	OCTBI	3526(CALMI)	CALMI,OCTBI	KQ425066:49276..101368	52092	OCTBI_Ocbimv22003683m.p,OCTBI_Ocbimv22003685m.p,OCTBI_Ocbimv22003687m.p
2781	OCTBI	2780(CALMI)	CALMI,OCTBI	KQ417896:66123..159864	93741	OCTBI_Ocbimv22012261m.p,OCTBI_Ocbimv22012262m.p,OCTBI_Ocbimv22012263m.p,OCTBI_Ocbimv22012265m.p,OCTBI_Ocbimv22012266m.p
3075	OCTBI	3074(CALMI),4338(EUPSC)	EUPSC,CALMI,OCTBI	KQ419775:38692..268401	229709	OCTBI_Ocbimv22025332m.p,OCTBI_Ocbimv22025333m.p,OCTBI_Ocbimv22025334m.p,OCTBI_Ocbimv22025335m.p,OCTBI_Ocbimv22025336m.p,OCTBI_Ocbimv22025330m.p,OCTBI_Ocbimv22025331m.p
3239	CALMI	3238(OCTBI)	OCTBI,CALMI	oct004010F:567..113639	113072	CALMI_Omin006093p,CALMI_Omin006090p,CALMI_Omin006091p
14279	EUPSC	14278(OCTBI)	EUPSC,OCTBI	Lachesis_group35__42_contigs__length_70637049:65371312..66100735	729423	EUPSC_cluster_1475,EUPSC_cluster_1476,EUPSC_cluster_20685,EUPSC_cluster_2456	PF15903 Filopodia upregulated, FAM65; PF15903 Filopodia upregulated, FAM65; PF00089 Trypsin-PF01498 Transposase; PF13855 Leucine rich repeat-PF13855 Leucine rich repeat-PF13855 Leucine rich repeat-PF13855 Leucine rich repeat-PF13927 Immunoglobulin domain-PF07679 Immunoglobulin I-set domain-PF07679 Immunoglobulin I-set domain
13851	EUPSC	3111(OCTBI)	CALMI,OCTBI,EUPSC	Lachesis_group41__39_contigs__length_54644242:38423160..38529949	106789	EUPSC_cluster_19057,EUPSC_cluster_19056,EUPSC_cluster_4639,EUPSC_cluster_12528	PF00092 von Willebrand factor type A domain-PF08487 Vault protein inter-alpha-trypsin domain; PF00144 Beta-lactamase; PF00144 Beta-lactamase; PF10185 Chaperone for wingless signalling and trafficking of LDL receptor
3109	CALMI	3110(OCTBI)	CALMI,OCTBI	oct005442F:2631..136212	133581	CALMI_Omin013635p,CALMI_Omin013636p,CALMI_Omin013637p
4178	EUPSC	11945(OCTBI)	EUPSC,OCTBI	Lachesis_group25__42_contigs__length_94613958:40523334..41492948	969614	EUPSC_cluster_18769,EUPSC_cluster_2268,EUPSC_cluster_815,EUPSC_cluster_8383,EUPSC_cluster_3413,EUPSC_cluster_12567,EUPSC_cluster_18771,EUPSC_cluster_6274	PF00084 Sushi repeat (SCR repeat)-PF00084 Sushi repeat (SCR repeat)-PF00084 Sushi repeat (SCR repeat); PF00084 Sushi repeat (SCR repeat)-PF00084 Sushi repeat (SCR repeat)-PF00084 Sushi repeat (SCR repeat)-PF00084 Sushi repeat (SCR repeat)-PF00084 Sushi repeat (SCR repeat)-PF00084 Sushi repeat (SCR repeat)-PF00084 Sushi repeat (SCR repeat)-PF00084 Sushi repeat (SCR repeat)-PF00084 Sushi repeat (SC…
3888	CALMI	4475(EUPSC),3887(OCTBI)	EUPSC,OCTBI,CALMI	oct005124F:1311..112671	111360	CALMI_Omin010645p,CALMI_Omin010642p,CALMI_Omin010643p,CALMI_Omin010646p
4293	EUPSC	2831(OCTBI),2364(CALMI)	OCTBI,CALMI,EUPSC	Lachesis_group10__55_contigs__length_138218214:22065701..22268441	202740	EUPSC_cluster_198,EUPSC_cluster_11331,EUPSC_cluster_15832,EUPSC_cluster_2780,EUPSC_cluster_460,EUPSC_cluster_28786,EUPSC_cluster_15428	PF06682 SOCE-associated regulatory factor of calcium homoeostasis-PF06682 SOCE-associated regulatory factor of calcium homoeostasis; PF06682 SOCE-associated regulatory factor of calcium homoeostasis; ; ; ; PF00106 short chain dehydrogenase; PF07690 Major Facilitator Superfamily
3640	CALMI	3641(OCTBI)	CALMI,OCTBI	oct006042F:14054..108936	94882	CALMI_Omin011430p,CALMI_Omin011429p,CALMI_Omin011431p
14160	EUPSC	14159(OCTBI)	OCTBI,EUPSC	Lachesis_group28__49_contigs__length_91470296:11888589..12108883	220294	EUPSC_cluster_13086,EUPSC_cluster_23134,EUPSC_cluster_11394,EUPSC_cluster_14030,EUPSC_cluster_23120	; ; ; PF00096 Zinc finger, C2H2 type-PF00096 Zinc finger, C2H2 type-PF00096 Zinc finger, C2H2 type; PF00444 Ribosomal protein L36
2843	CALMI	3163(OCTBI),2842(OCTBI)	CALMI,OCTBI	oct000750F:301948..527140	225192	CALMI_Omin006810p,CALMI_Omin006816p,CALMI_Omin006809p,CALMI_Omin006814p,CALMI_Omin006815p
14503	OCTBI	14502(EUPSC)	EUPSC,OCTBI	KQ415992:456456..627328	170872	OCTBI_Ocbimv22018446m.p,OCTBI_Ocbimv22018447m.p,OCTBI_Ocbimv22018450m.p,OCTBI_Ocbimv22018452m.p,OCTBI_Ocbimv22018454m.p
14121	EUPSC	14122(OCTBI)	EUPSC,OCTBI	Lachesis_group5__70_contigs__length_158228327:142403777..143764408	1360631	EUPSC_cluster_5314,EUPSC_cluster_9970,EUPSC_cluster_313,EUPSC_cluster_2571,EUPSC_cluster_10092,EUPSC_cluster_10093,EUPSC_cluster_3179	PF00250 Forkhead domain; PF00400 WD domain, G-beta repeat; ; PF11882 Domain of unknown function (DUF3402)-PF11882 Domain of unknown function (DUF3402)-PF07923 N1221-like protein; PF01429 Methyl-CpG binding domain; ; PF00096 Zinc finger, C2H2 type-PF00096 Zinc finger, C2H2 type-PF00096 Zinc finger, C2H2 type
2771	CALMI	2770(OCTBI)	EUPSC,CALMI,OCTBI	oct019979F:7979..62878	54899	CALMI_Omin020556p,CALMI_Omin020554p,CALMI_Omin020555p
14288	EUPSC	14287(OCTBI)	OCTBI,EUPSC	Lachesis_group8__53_contigs__length_148332072:24330784..24764604	433820	EUPSC_cluster_26341,EUPSC_cluster_9759,EUPSC_cluster_13164	; PF00069 Protein kinase domain-PF12330 Haspin like kinase domain-PF02149 Kinase associated domain 1;
3085	OCTBI	3084(CALMI)	CALMI,OCTBI	KQ419989:208858..255462	46604	OCTBI_Ocbimv22026094m.p,OCTBI_Ocbimv22026095m.p,OCTBI_Ocbimv22026096m.p
3793	OCTBI	4147(EUPSC),3792(CALMI)	EUPSC,OCTBI,CALMI	KQ424877:260935..533958	273023	OCTBI_Ocbimv22003078m.p,OCTBI_Ocbimv22003079m.p,OCTBI_Ocbimv22003080m.p,OCTBI_Ocbimv22003083m.p,OCTBI_Ocbimv22003085m.p,OCTBI_Ocbimv22003088m.p,OCTBI_Ocbimv22003082m.p,OCTBI_Ocbimv22003089m.p
14321	EUPSC	14322(OCTBI)	OCTBI,EUPSC	Lachesis_group29__46_contigs__length_89259793:88263148..89015363	752215	EUPSC_cluster_20487,EUPSC_cluster_9949,EUPSC_cluster_366	PF00001 7 transmembrane receptor (rhodopsin family); PF00209 Sodium:neurotransmitter symporter family; PF00209 Sodium:neurotransmitter symporter family
3354	CALMI	3355(OCTBI)	CALMI,OCTBI	oct011908F:1327..87274	85947	CALMI_Omin026888p,CALMI_Omin026890p,CALMI_Omin026889p
3020	CALMI	4386(EUPSC)	EUPSC,CALMI,OCTBI	oct009193F:22500..132397	109897	CALMI_Omin011545p,CALMI_Omin011544p,CALMI_Omin011546p
3007	CALMI	3008(OCTBI)	CALMI,OCTBI	oct008916F:59520..118498	58978	CALMI_Omin014183p,CALMI_Omin014184p,CALMI_Omin014185p
3665	CALMI	2847(OCTBI)	CALMI,OCTBI	oct010380F:4988..91407	86419	CALMI_Omin024318p,CALMI_Omin024320p,CALMI_Omin024321p,CALMI_Omin024319p
3321	OCTBI	3322(CALMI),4366(EUPSC)	EUPSC,OCTBI,CALMI	KQ426101:61243..145170	83927	OCTBI_Ocbimv22006769m.p,OCTBI_Ocbimv22006770m.p,OCTBI_Ocbimv22006773m.p,OCTBI_Ocbimv22006774m.p
3795	CALMI	3794(OCTBI),4221(EUPSC)	CALMI,OCTBI,EUPSC	oct008898F:606..149106	148500	CALMI_Omin015269p,CALMI_Omin015270p,CALMI_Omin015268p,CALMI_Omin015272p,CALMI_Omin015271p
3083	OCTBI	3082(CALMI)	CALMI,OCTBI	KQ422621:12052..263569	251517	OCTBI_Ocbimv22035977m.p,OCTBI_Ocbimv22035980m.p,OCTBI_Ocbimv22035981m.p,OCTBI_Ocbimv22035982m.p,OCTBI_Ocbimv22035985m.p,OCTBI_Ocbimv22035970m.p,OCTBI_Ocbimv22035972m.p,OCTBI_Ocbimv22035973m.p,OCTBI_Ocbimv22035967m.p,OCTBI_Ocbimv22035968m.p
3639	OCTBI	2061(CALMI)	OCTBI,CALMI	KQ419886:154582..340149	185567	OCTBI_Ocbimv22025677m.p,OCTBI_Ocbimv22025678m.p,OCTBI_Ocbimv22025680m.p,OCTBI_Ocbimv22025681m.p,OCTBI_Ocbimv22025682m.p,OCTBI_Ocbimv22025683m.p,OCTBI_Ocbimv22025684m.p
3570	OCTBI	3569(CALMI)	OCTBI,CALMI,EUPSC	KQ421177:1101..74270	73169	OCTBI_Ocbimv22031150m.p,OCTBI_Ocbimv22031151m.p,OCTBI_Ocbimv22031153m.p,OCTBI_Ocbimv22031154m.p,OCTBI_Ocbimv22031155m.p
13846	OCTBI	13845(EUPSC)	OCTBI,EUPSC	KQ424659:16477..73373	56896	OCTBI_Ocbimv22002440m.p,OCTBI_Ocbimv22002443m.p,OCTBI_Ocbimv22002445m.p
14360	OCTBI	14359(EUPSC)	EUPSC,OCTBI	KQ422015:842356..999299	156943	OCTBI_Ocbimv22034284m.p,OCTBI_Ocbimv22034287m.p,OCTBI_Ocbimv22034288m.p,OCTBI_Ocbimv22034290m.p,OCTBI_Ocbimv22034292m.p,OCTBI_Ocbimv22034293m.p
2996	OCTBI	2997(CALMI),3502(CALMI)	CALMI,OCTBI	KQ427654:24249..100391	76142	OCTBI_Ocbimv22011145m.p,OCTBI_Ocbimv22011146m.p,OCTBI_Ocbimv22011147m.p,OCTBI_Ocbimv22011140m.p
3523	CALMI	3524(OCTBI)	CALMI,OCTBI	oct006385F:28863..182536	153673	CALMI_Omin014637p,CALMI_Omin014638p,CALMI_Omin014639p
3240	OCTBI	3241(CALMI)	CALMI,OCTBI	KQ421092:95485..266185	170700	OCTBI_Ocbimv22030811m.p,OCTBI_Ocbimv22030813m.p,OCTBI_Ocbimv22030814m.p,OCTBI_Ocbimv22030815m.p,OCTBI_Ocbimv22030806m.p,OCTBI_Ocbimv22030808m.p,OCTBI_Ocbimv22030816m.p
14106	OCTBI	14105(EUPSC)	OCTBI,EUPSC	KQ418431:974750..1017706	42956	OCTBI_Ocbimv22016998m.p,OCTBI_Ocbimv22017001m.p,OCTBI_Ocbimv22017002m.p
2559	CALMI	2558(OCTBI)	CALMI,OCTBI	oct005233F:23422..173353	149931	CALMI_Omin010654p,CALMI_Omin010653p,CALMI_Omin010652p
3428	OCTBI	3427(CALMI)	OCTBI,CALMI,EUPSC	KQ417620:299185..684640	385455	OCTBI_Ocbimv22009822m.p,OCTBI_Ocbimv22009823m.p,OCTBI_Ocbimv22009826m.p,OCTBI_Ocbimv22009827m.p,OCTBI_Ocbimv22009828m.p,OCTBI_Ocbimv22009829m.p,OCTBI_Ocbimv22009830m.p,OCTBI_Ocbimv22009831m.p,OCTBI_Ocbimv22009832m.p,OCTBI_Ocbimv22009834m.p,OCTBI_Ocbimv22009838m.p
2752	OCTBI	2751(CALMI)	CALMI,OCTBI	KQ417007:140136..235174	95038	OCTBI_Ocbimv22002381m.p,OCTBI_Ocbimv22002383m.p,OCTBI_Ocbimv22002385m.p
14061	OCTBI	14062(EUPSC)	EUPSC,OCTBI	KQ418338:317606..401403	83797	OCTBI_Ocbimv22016317m.p,OCTBI_Ocbimv22016318m.p,OCTBI_Ocbimv22016320m.p,OCTBI_Ocbimv22016321m.p
13996	EUPSC	13997(OCTBI)	EUPSC,OCTBI	Lachesis_group27__44_contigs__length_93323795:25157397..26032476	875079	EUPSC_cluster_11132,EUPSC_cluster_7099,EUPSC_cluster_951,EUPSC_cluster_20810,EUPSC_cluster_6939	PF03853 YjeF-related protein N-terminus-PF09532 FDF domain; PF04858 TH1 protein-PF04858 TH1 protein-PF04858 TH1 protein; PF16212 Phospholipid-translocating P-type ATPase C-terminal-PF16212 Phospholipid-translocating P-type ATPase C-terminal-PF00122 E1-E2 ATPase-PF16209 Phospholipid-translocating ATPase N-terminal-PF00702 haloacid dehalogenase-like hydrolase; PF01926 50S ribosome-binding GTPase-PF…
14447	OCTBI	14446(EUPSC)	OCTBI,EUPSC	KQ420958:2689..260484	257795	OCTBI_Ocbimv22030341m.p,OCTBI_Ocbimv22030343m.p,OCTBI_Ocbimv22030344m.p
14496	EUPSC	14497(OCTBI)	OCTBI,EUPSC	Lachesis_group32__40_contigs__length_78634074:69580840..70054298	473458	EUPSC_cluster_15635,EUPSC_cluster_1359,EUPSC_cluster_18381,EUPSC_cluster_10534,EUPSC_cluster_3125,EUPSC_cluster_6791	PF00012 Hsp70 protein; PF03131 bZIP Maf transcription factor; PF09813 Coiled-coil domain-containing protein 56; PF04505 Interferon-induced transmembrane protein; PF06839 GRF zinc finger-PF00929 Exonuclease; PF16897 C-terminal region of MMR_HSR1 domain-PF01926 50S ribosome-binding GTPase-PF02824 TGS domain
13947	OCTBI	13946(EUPSC)	EUPSC,OCTBI	KQ417911:101795..120229	18434	OCTBI_Ocbimv22012414m.p,OCTBI_Ocbimv22012415m.p,OCTBI_Ocbimv22012416m.p
3219	CALMI	3218(OCTBI)	CALMI,OCTBI	oct018908F:14401..69130	54729	CALMI_Omin019644p,CALMI_Omin019643p,CALMI_Omin019646p
14265	EUPSC	14266(OCTBI)	OCTBI,EUPSC	Lachesis_group17__52_contigs__length_118315660:73655220..73783925	128705	EUPSC_cluster_23713,EUPSC_cluster_8638,EUPSC_cluster_23712	; PF03248 Rer1 family;
14304	EUPSC	14305(OCTBI)	EUPSC,OCTBI	Lachesis_group6__62_contigs__length_156955521:93388969..95273768	1884799	EUPSC_cluster_22174,EUPSC_cluster_22177,EUPSC_cluster_13534	PF02493 MORN repeat-PF02493 MORN repeat-PF02493 MORN repeat; ; PF00595 PDZ domain (Also known as DHR or GLGF)-PF00169 PH domain-PF00169 PH domain
13831	EUPSC	3901(OCTBI)	EUPSC,OCTBI	Lachesis_group15__55_contigs__length_125787758:66656690..66821519	164829	EUPSC_cluster_15019,EUPSC_cluster_7558,EUPSC_cluster_9205,EUPSC_cluster_14025,EUPSC_cluster_19690	PF00688 TGF-beta propeptide; PF01593 Flavin containing amine oxidoreductase; PF00096 Zinc finger, C2H2 type-PF00096 Zinc finger, C2H2 type-PF00096 Zinc finger, C2H2 type-PF00096 Zinc finger, C2H2 type-PF00096 Zinc finger, C2H2 type-PF00096 Zinc finger, C2H2 type-PF00096 Zinc finger, C2H2 type-PF00096 Zinc finger, C2H2 type-PF00096 Zinc finger, C2H2 type-PF13912 C2H2-type zinc finger-PF13912 C2H2-…
3154	OCTBI	14511(EUPSC),3155(CALMI)	EUPSC,CALMI,OCTBI	KQ415854:24347..114263	89916	OCTBI_Ocbimv22008445m.p,OCTBI_Ocbimv22008446m.p,OCTBI_Ocbimv22008447m.p,OCTBI_Ocbimv22008449m.p,OCTBI_Ocbimv22008444m.p
4452	EUPSC	3060(CALMI),3059(OCTBI)	OCTBI,CALMI,EUPSC	Lachesis_group19__43_contigs__length_108131866:36156473..36328433	171960	EUPSC_cluster_24056,EUPSC_cluster_24057,EUPSC_cluster_16394	PF00092 von Willebrand factor type A domain; PF00092 von Willebrand factor type A domain; PF02574 Homocysteine S-methyltransferase
3073	OCTBI	3072(CALMI)	OCTBI,CALMI	KQ421896:317710..375756	58046	OCTBI_Ocbimv22033866m.p,OCTBI_Ocbimv22033867m.p,OCTBI_Ocbimv22033868m.p,OCTBI_Ocbimv22033869m.p,OCTBI_Ocbimv22033870m.p,OCTBI_Ocbimv22033871m.p,OCTBI_Ocbimv22033872m.p
3757	OCTBI	4223(EUPSC)	EUPSC,OCTBI	KQ416616:882696..1282570	399874	OCTBI_Ocbimv22036067m.p,OCTBI_Ocbimv22036071m.p,OCTBI_Ocbimv22036073m.p,OCTBI_Ocbimv22036077m.p,OCTBI_Ocbimv22036081m.p,OCTBI_Ocbimv22036083m.p,OCTBI_Ocbimv22036084m.p
3942	CALMI	3943(OCTBI)	CALMI,OCTBI	oct016255F:17418..74796	57378	CALMI_Omin016162p,CALMI_Omin016163p,CALMI_Omin016165p
14020	EUPSC	14019(OCTBI)	EUPSC,OCTBI	Lachesis_group5__70_contigs__length_158228327:51274297..51912955	638658	EUPSC_cluster_3671,EUPSC_cluster_16114,EUPSC_cluster_2038,EUPSC_cluster_28234,EUPSC_cluster_9140	PF00078 Reverse transcriptase (RNA-dependent DNA polymerase); PF03151 Triose-phosphate Transporter family; PF00096 Zinc finger, C2H2 type-PF00096 Zinc finger, C2H2 type-PF00096 Zinc finger, C2H2 type-PF00096 Zinc finger, C2H2 type; ; PF00531 Death domain
2802	CALMI	2803(OCTBI)	OCTBI,CALMI	oct012018F:1521..103088	101567	CALMI_Omin027238p,CALMI_Omin027237p,CALMI_Omin027236p
4406	EUPSC	3496(CALMI)	EUPSC,CALMI	Lachesis_group21__43_contigs__length_103963499:4642209..5162474	520265	EUPSC_cluster_12298,EUPSC_cluster_482,EUPSC_cluster_9830,EUPSC_cluster_27778,EUPSC_cluster_4975,EUPSC_cluster_14394	PF15115 Domain of unknown function with conserved HDNR motif; PF12937 F-box-like-PF00400 WD domain, G-beta repeat-PF00400 WD domain, G-beta repeat-PF00400 WD domain, G-beta repeat-PF00400 WD domain, G-beta repeat-PF00400 WD domain, G-beta repeat-PF00400 WD domain, G-beta repeat; PF00041 Fibronectin type III domain; PF00041 Fibronectin type III domain; ; PF04577 Protein of unknown function (DUF563)
3659	OCTBI	3660(CALMI)	OCTBI,CALMI	KQ421871:192920..288940	96020	OCTBI_Ocbimv22033779m.p,OCTBI_Ocbimv22033782m.p,OCTBI_Ocbimv22033783m.p
3883	CALMI	3884(OCTBI)	OCTBI,CALMI	oct004115F:8184..97504	89320	CALMI_Omin001452p,CALMI_Omin001451p,CALMI_Omin001455p
2623	OCTBI	4296(EUPSC)	OCTBI,EUPSC	KQ427059:90399..839842	749443	OCTBI_Ocbimv22009650m.p,OCTBI_Ocbimv22009654m.p,OCTBI_Ocbimv22009655m.p,OCTBI_Ocbimv22009660m.p,OCTBI_Ocbimv22009661m.p,OCTBI_Ocbimv22009663m.p,OCTBI_Ocbimv22009634m.p,OCTBI_Ocbimv22009636m.p,OCTBI_Ocbimv22009637m.p,OCTBI_Ocbimv22009638m.p,OCTBI_Ocbimv22009641m.p,OCTBI_Ocbimv22009643m.p,OCTBI_Ocbimv22009645m.p,OCTBI_Ocbimv22009665m.p,OCTBI_Ocbimv22009667m.p
4307	CALMI	4308(EUPSC)	EUPSC,CALMI	oct002192F:21..115304	115283	CALMI_Omin004381p,CALMI_Omin004383p,CALMI_Omin004385p,CALMI_Omin004382p
3668	CALMI	3096(OCTBI)	EUPSC,CALMI,OCTBI	oct000324F:11603..292337	280734	CALMI_Omin001785p,CALMI_Omin001783p,CALMI_Omin001787p,CALMI_Omin001782p,CALMI_Omin001784p,CALMI_Omin001786p
2706	OCTBI	2707(CALMI),4353(EUPSC)	EUPSC,OCTBI,CALMI	KQ420595:416307..609787	193480	OCTBI_Ocbimv22028870m.p,OCTBI_Ocbimv22028871m.p,OCTBI_Ocbimv22028872m.p,OCTBI_Ocbimv22028868m.p
14103	EUPSC	14104(OCTBI)	OCTBI,EUPSC	Lachesis_group27__44_contigs__length_93323795:46661544..47053367	391823	EUPSC_cluster_5370,EUPSC_cluster_7051,EUPSC_cluster_4531	PF01399 PCI domain-PF10602 26S proteasome subunit RPN7; PF12796 Ankyrin repeats (3 copies);
14238	OCTBI	14237(EUPSC)	OCTBI,EUPSC	KQ427527:48242..132994	84752	OCTBI_Ocbimv22010815m.p,OCTBI_Ocbimv22010816m.p,OCTBI_Ocbimv22010818m.p,OCTBI_Ocbimv22010820m.p,OCTBI_Ocbimv22010821m.p
14232	EUPSC	3096(OCTBI)	EUPSC,CALMI,OCTBI	Lachesis_group19__43_contigs__length_108131866:81376072..81718175	342103	EUPSC_cluster_1906,EUPSC_cluster_2250,EUPSC_cluster_4487	PF05477 Surfeit locus protein 2 (SURF2)-PF10211 Axonemal dynein light chain; PF00566 Rab-GTPase-TBC domain; PF00147 Fibrinogen beta and gamma chains, C-terminal globular domain
9047	EUPSC	14207(OCTBI)	OCTBI,EUPSC	Lachesis_group24__36_contigs__length_98752639:45642257..46569503	927246	EUPSC_cluster_11077,EUPSC_cluster_23389,EUPSC_cluster_23388,EUPSC_cluster_7171,EUPSC_cluster_7170,EUPSC_cluster_23391,EUPSC_cluster_9285	PF00025 ADP-ribosylation factor family; PF00631 GGL domain; PF02475 Met-10+ like-protein; ; ; ; PF12937 F-box-like
3820	CALMI	3819(OCTBI)	CALMI,OCTBI	oct009731F:37552..124838	87286	CALMI_Omin011156p,CALMI_Omin011158p,CALMI_Omin011157p
3334	CALMI	3335(OCTBI)	OCTBI,CALMI	oct000271F:668508..797460	128952	CALMI_Omin010343p,CALMI_Omin010352p,CALMI_Omin010351p
2848	CALMI	2847(OCTBI)	CALMI,OCTBI	oct025884F:36628..39061	2433	CALMI_Omin023597p,CALMI_Omin023596p,CALMI_Omin023599p,CALMI_Omin023595p
14521	EUPSC	3872(OCTBI)	EUPSC,OCTBI,CALMI	Lachesis_group9__67_contigs__length_144638433:1422209..1584199	161990	EUPSC_cluster_16253,EUPSC_cluster_9823,EUPSC_cluster_7329	PF13300 Domain of unknown function (DUF4078); PF03645 Tctex-1 family;
14450	EUPSC	14449(OCTBI)	EUPSC,OCTBI	Lachesis_group7__52_contigs__length_145002158:115915736..116274321	358585	EUPSC_cluster_1266,EUPSC_cluster_4249,EUPSC_cluster_19741	PF00664 ABC transporter transmembrane region-PF00664 ABC transporter transmembrane region-PF00005 ABC transporter-PF00005 ABC transporter; PF00883 Cytosol aminopeptidase family, catalytic domain-PF00883 Cytosol aminopeptidase family, catalytic domain-PF02789 Cytosol aminopeptidase family, N-terminal domain; PF00883 Cytosol aminopeptidase family, catalytic domain
4183	CALMI	4182(EUPSC)	EUPSC,CALMI	oct000367F:11529..473576	462047	CALMI_Omin008793p,CALMI_Omin008796p,CALMI_Omin008791p
4432	EUPSC	3777(CALMI)	OCTBI,CALMI,EUPSC	Lachesis_group9__67_contigs__length_144638433:106266669..106412467	145798	EUPSC_cluster_3106,EUPSC_cluster_9701,EUPSC_cluster_5011	PF05794 T-complex protein 11; PF11831 pre-mRNA splicing factor component-PF13921 Myb-like DNA-binding domain; PF00535 Glycosyl transferase family 2
3905	CALMI	3904(OCTBI)	CALMI,OCTBI	oct002203F:13061..347458	334397	CALMI_Omin002645p,CALMI_Omin002646p,CALMI_Omin002647p,CALMI_Omin002643p,CALMI_Omin002644p
13950	EUPSC	13951(OCTBI)	OCTBI,EUPSC	Lachesis_group5__70_contigs__length_158228327:88659715..88973563	313848	EUPSC_cluster_25220,EUPSC_cluster_13504,EUPSC_cluster_8848,EUPSC_cluster_3068	PF00619 Caspase recruitment domain-PF00656 Caspase domain; PF01733 Nucleoside transporter-PF01733 Nucleoside transporter; ; PF07679 Immunoglobulin I-set domain-PF13927 Immunoglobulin domain-PF13927 Immunoglobulin domain
3134	OCTBI	4476(EUPSC),3133(CALMI)	EUPSC,CALMI,OCTBI	KQ419071:49462..252336	202874	OCTBI_Ocbimv22021531m.p,OCTBI_Ocbimv22021532m.p,OCTBI_Ocbimv22021534m.p,OCTBI_Ocbimv22021536m.p,OCTBI_Ocbimv22021537m.p,OCTBI_Ocbimv22021528m.p
3425	OCTBI	3426(CALMI)	OCTBI,CALMI	KQ417023:1172679..1248917	76238	OCTBI_Ocbimv22002637m.p,OCTBI_Ocbimv22002638m.p,OCTBI_Ocbimv22002640m.p
2924	OCTBI	2923(CALMI)	CALMI,OCTBI	KQ423703:245392..525355	279963	OCTBI_Ocbimv22039568m.p,OCTBI_Ocbimv22039571m.p,OCTBI_Ocbimv22039574m.p,OCTBI_Ocbimv22039575m.p
3741	CALMI	3742(OCTBI)	CALMI,OCTBI	oct000794F:3561..434567	431006	CALMI_Omin007329p,CALMI_Omin007331p,CALMI_Omin007330p,CALMI_Omin007328p,CALMI_Omin007333p
2565	OCTBI	2564(CALMI)	OCTBI,CALMI	KQ421893:3607..109451	105844	OCTBI_Ocbimv22033832m.p,OCTBI_Ocbimv22033834m.p,OCTBI_Ocbimv22033837m.p,OCTBI_Ocbimv22033838m.p
13843	EUPSC	13842(OCTBI)	EUPSC,OCTBI	Lachesis_group22__46_contigs__length_104782409:36103820..36364639	260819	EUPSC_cluster_14233,EUPSC_cluster_3904,EUPSC_cluster_3903,EUPSC_cluster_15156	PF00012 Hsp70 protein; PF01168 Alanine racemase, N-terminal domain; PF01168 Alanine racemase, N-terminal domain; PF01661 Macro domain-PF13923 Zinc finger, C3HC4 type (RING finger)
3737	CALMI	4461(EUPSC),3736(OCTBI)	OCTBI,CALMI,EUPSC	oct009005F:71827..140666	68839	CALMI_Omin010789p,CALMI_Omin010791p,CALMI_Omin010790p,CALMI_Omin010788p
14007	OCTBI	14006(EUPSC)	EUPSC,OCTBI	KQ420055:48813..321379	272566	OCTBI_Ocbimv22026474m.p,OCTBI_Ocbimv22026475m.p,OCTBI_Ocbimv22026479m.p
14277	EUPSC	14276(OCTBI)	EUPSC,OCTBI	Lachesis_group14__44_contigs__length_129294686:36177996..36352560	174564	EUPSC_cluster_3882,EUPSC_cluster_5433,EUPSC_cluster_651	PF06728 GPI transamidase subunit PIG-U; PF03167 Uracil DNA glycosylase superfamily; PF00173 Cytochrome b5-like Heme/Steroid binding domain
3873	CALMI	4418(EUPSC)	CALMI,EUPSC	oct003494F:8665..172370	163705	CALMI_Omin007732p,CALMI_Omin007733p,CALMI_Omin007734p
4241	EUPSC	2734(OCTBI),2733(CALMI)	OCTBI,CALMI,EUPSC	Lachesis_group41__39_contigs__length_54644242:1300102..1427022	126920	EUPSC_cluster_16488,EUPSC_cluster_3846,EUPSC_cluster_11125	PF02770 Acyl-CoA dehydrogenase, middle domain-PF00441 Acyl-CoA dehydrogenase, C-terminal domain-PF02771 Acyl-CoA dehydrogenase, N-terminal domain; PF00888 Cullin family; PF01259 SAICAR synthetase-PF00731 AIR carboxylase
2951	CALMI	4154(EUPSC),2950(OCTBI)	EUPSC,OCTBI,CALMI	oct006863F:6878..157652	150774	CALMI_Omin013721p,CALMI_Omin013720p,CALMI_Omin013718p,CALMI_Omin013717p,CALMI_Omin013722p
3274	CALMI	3273(OCTBI)	OCTBI,CALMI	oct006713F:14971..161763	146792	CALMI_Omin015287p,CALMI_Omin015288p,CALMI_Omin015289p,CALMI_Omin015286p
14008	EUPSC	3717(OCTBI)	EUPSC,OCTBI,CALMI	Lachesis_group4__56_contigs__length_174030884:140528373..141483613	955240	EUPSC_cluster_18243,EUPSC_cluster_18244,EUPSC_cluster_18259	PF03142 Chitin synthase; PF00063 Myosin head (motor domain); PF00010 Helix-loop-helix DNA-binding domain
14278	OCTBI	14279(EUPSC)	OCTBI,EUPSC	KQ421891:85711..256199	170488	OCTBI_Ocbimv22033823m.p,OCTBI_Ocbimv22033828m.p,OCTBI_Ocbimv22033829m.p,OCTBI_Ocbimv22033831m.p
14002	EUPSC	14001(OCTBI)	OCTBI,EUPSC	Lachesis_group11__73_contigs__length_131769366:63208547..64397864	1189317	EUPSC_cluster_1305,EUPSC_cluster_23316,EUPSC_cluster_4208	PF03798 TLC domain; PF00109 Beta-ketoacyl synthase, N-terminal domain-PF02801 Beta-ketoacyl synthase, C-terminal domain; PF00076 RNA recognition motif. (a.k.a. RRM, RBD, or RNP domain)-PF00076 RNA recognition motif. (a.k.a. RRM, RBD, or RNP domain)
3803	OCTBI	4277(EUPSC),3804(CALMI)	EUPSC,OCTBI,CALMI	KQ419009:255748..370596	114848	OCTBI_Ocbimv22021144m.p,OCTBI_Ocbimv22021145m.p,OCTBI_Ocbimv22021147m.p,OCTBI_Ocbimv22021148m.p
2882	CALMI	2883(OCTBI)	OCTBI,CALMI	oct012963F:1267..76179	74912	CALMI_Omin025052p,CALMI_Omin025053p,CALMI_Omin025054p
4486	EUPSC	3670(CALMI),3669(OCTBI)	EUPSC,CALMI,OCTBI	Lachesis_group35__42_contigs__length_70637049:30202545..30457081	254536	EUPSC_cluster_2277,EUPSC_cluster_11692,EUPSC_cluster_1626,EUPSC_cluster_3727,EUPSC_cluster_27003	PF03153 Transcription factor IIA, alpha/beta subunit-PF03153 Transcription factor IIA, alpha/beta subunit; PF00164 Ribosomal protein S12/S23; PF05827 Vacuolar ATP synthase subunit S1 (ATP6S1); PF15501 Nuclear protein MDM1; PF01423 LSM domain
3622	OCTBI	4217(EUPSC)	OCTBI,CALMI,EUPSC	KQ417294:52210..439531	387321	OCTBI_Ocbimv22006081m.p,OCTBI_Ocbimv22006083m.p,OCTBI_Ocbimv22006084m.p,OCTBI_Ocbimv22006086m.p,OCTBI_Ocbimv22006077m.p,OCTBI_Ocbimv22006078m.p,OCTBI_Ocbimv22006079m.p,OCTBI_Ocbimv22006087m.p,OCTBI_Ocbimv22006089m.p
[truncated: 182 more rows]

## Sheet: Metazoan
ID	Species	Connecting IDs	All species in network	Location	Length, bp	Genes	Annotation
[truncated: 4,997 more rows]
