# Supplementary material for: Emergence of novel cephalopod gene regulation and expression through large-scale genome reorganization
Source: Nat Commun. 2022 Apr 21;13:2172. doi: 10.1038/s41467-022-29694-7 (PMC9023564; doi:10.1038/s41467-022-29694-7)
Supplement: Supplementary file 5 — Supplementary Dataset 2 [file 41467_2022_29694_MOESM5_ESM.xlsx]

## Sheet: Sheet1
Stage	Expression module	Motif Name	Consensus	P-value	Log P-value	q-value (Benjamini)	# of Target Sequences with Motif(of 333)	% of Target Sequences with Motif	# of Background Sequences with Motif(of 49121)	% of Background Sequences with Motif
20	1	Pitx1:Ebox(Homeobox,bHLH)/Hindlimb-Pitx1-ChIP-Seq(GSE41591)/Homer	YTAATTRAWWCCAGATGT	1e-06	-15.35	0.0002	26	0.0781	1178.9	0.024
20	1	p63(p53)/Keratinocyte-p63-ChIP-Seq(GSE17611)/Homer	NNDRCATGYCYNRRCATGYH	0.0001	-11.26	0.006	22	0.0661	1128.8	0.023
20	1	Esrrb(NR)/mES-Esrrb-ChIP-Seq(GSE11431)/Homer	KTGACCTTGA	0.0001	-10.41	0.0093	41	0.1231	3063.9	0.0625
20	1	GATA4(C2C2gata)/col-GATA4-DAP-Seq(GSE60143)/Homer	DDWTYAGATCTR	0.0001	-10.18	0.0093	49	0.1471	3968.1	0.0809
20	1	ZBTB18(Zf)/HEK293-ZBTB18.GFP-ChIP-Seq(GSE58341)/Homer	AACATCTGGA	0.001	-9.167	0.0193	26	0.0781	1682	0.0343		Embryonic development
20	1	Atoh1(bHLH)/Cerebellum-Atoh1-ChIP-Seq(GSE22111)/Homer	VNRVCAGCTGGY	0.001	-9.141	0.0193	43	0.1291	3466.6	0.0707		Nervous system
20	1	Rfx5(HTH)/GM12878-Rfx5-ChIP-Seq(GSE31477)/Homer	SCCTAGCAACAG	0.001	-9.031	0.0193	20	0.0601	1131.6	0.0231		Zink finger
20	1	SPL5(SBP)/colamp-SPL5-DAP-Seq(GSE60143)/Homer	NNHGTACGGHNN	0.001	-8.12	0.0343	44	0.1321	3749.8	0.0764
20	1	NFAT(RHD)/Jurkat-NFATC1-ChIP-Seq(Jolma_et_al.)/Homer	ATTTTCCATT	0.001	-8.079	0.0343	56	0.1682	5161.5	0.1052
20	1	TGA1(bZIP)/colamp-TGA1-DAP-Seq(GSE60143)/Homer	TGACGTCAKC	0.001	-8.025	0.0343	32	0.0961	2436.3	0.0497
20	1	WRKY3(WRKY)/col-WRKY3-DAP-Seq(GSE60143)/Homer	NCKTTGACYDDN	0.001	-7.93	0.0343	37	0.1111	2994.4	0.061
20	1	GATA14(C2C2gata)/col-GATA14-DAP-Seq(GSE60143)/Homer	AYCAGATCTG	0.001	-7.695	0.0349	37	0.1111	3032.2	0.0618
20	1	Nr5a2(NR)/Pancreas-LRH1-ChIP-Seq(GSE34295)/Homer	BTCAAGGTCA	0.001	-7.558	0.037	31	0.0931	2396.9	0.0489
20	1	WRKY26(WRKY)/colamp-WRKY26-DAP-Seq(GSE60143)/Homer	CGTTGACTWDKN	0.001	-7.369	0.0415	31	0.0931	2425	0.0494
20	1	Atf1(bZIP)/K562-ATF1-ChIP-Seq(GSE31477)/Homer	GATGACGTCA	0.001	-7.29	0.0419	48	0.1441	4372.9	0.0892
20	1	WRKY40(WRKY)/colamp-WRKY40-DAP-Seq(GSE60143)/Homer	AHWAGTCAAC	0.001	-7.193	0.0433	35	0.1051	2892	0.059
20	1	Nur77(NR)/K562-NR4A1-ChIP-Seq(GSE31363)/Homer	TGACCTTTNCNT	0.001	-7.033	0.0478	18	0.0541	1132.5	0.0231
20	1	TGA4(bZIP)/colamp-TGA4-DAP-Seq(GSE60143)/Homer	RTGACGTCAKCW	0.001	-6.931	0.0501	25	0.0751	1847.8	0.0377
20	2	TCP7(TCP)/col-TCP7-DAP-Seq(GSE60143)/Homer	GTGGGSCCCACHHNN	1e-09	-21.06	0	40	0.0603	943.1	0.0195
20	2	Chop(bZIP)/MEF-Chop-ChIP-Seq(GSE35681)/Homer	ATTGCATCAT	1e-08	-18.84	0	64	0.0965	2128.4	0.044
20	2	TATA-Box(TBP)/Promoter/Homer	CCTTTTAWAGSC	1e-07	-17.2	0	147	0.2217	6914.7	0.143
20	2	ZBTB18(Zf)/HEK293-ZBTB18.GFP-ChIP-Seq(GSE58341)/Homer	AACATCTGGA	1e-06	-15.76	0	52	0.0784	1714	0.0354
20	2	TCP1(TCP)/col-TCP1-DAP-Seq(GSE60143)/Homer	GGGGGCCCMMCN	1e-06	-14.45	0.0001	25	0.0377	565.9	0.0117
20	2	HDG1(Homeobox)/col100-HDG1-DAP-Seq(GSE60143)/Homer	DDYAATTAATGH	1e-06	-14.21	0.0001	96	0.1448	4202.7	0.0869
20	2	THRb(NR)/Liver-NR1A2-ChIP-Seq(GSE52613)/Homer	TRAGGTCA	1e-06	-14.08	0.0001	258	0.3891	14549.4	0.3008
20	2	E2F1(E2F)/Hela-E2F1-ChIP-Seq(GSE22478)/Homer	CWGGCGGGAA	1e-05	-13.25	0.0002	21	0.0317	448.3	0.0093
20	2	NeuroG2(bHLH)/Fibroblast-NeuroG2-ChIP-Seq(GSE75910)/Homer	ACCATCTGTT	1e-05	-12.95	0.0002	119	0.1795	5701.7	0.1179
20	2	COUP-TFII(NR)/Artia-Nr2f2-ChIP-Seq(GSE46497)/Homer	AGRGGTCA	1e-05	-12.53	0.0003	135	0.2036	6737.6	0.1393
20	2	Atf4(bZIP)/MEF-Atf4-ChIP-Seq(GSE35681)/Homer	MTGATGCAAT	1e-05	-12.35	0.0004	68	0.1026	2789.2	0.0577
20	2	ZFX(Zf)/mES-Zfx-ChIP-Seq(GSE11431)/Homer	AGGCCTRG	1e-05	-12.11	0.0004	54	0.0814	2051.9	0.0424
20	2	WIP5(C2H2)/colamp-WIP5-DAP-Seq(GSE60143)/Homer	TDTTCTCMAGGT	1e-05	-11.9	0.0005	93	0.1403	4264.5	0.0882
20	2	AP-2gamma(AP2)/MCF7-TFAP2C-ChIP-Seq(GSE21234)/Homer	SCCTSAGGSCAW	1e-05	-11.74	0.0005	43	0.0649	1508.2	0.0312
20	2	TATA-box/Drosophila-Promoters/Homer	CTATAAAAGCSV	1e-05	-11.6	0.0006	29	0.0437	843.8	0.0174
20	2	Rfx5(HTH)/GM12878-Rfx5-ChIP-Seq(GSE31477)/Homer	SCCTAGCAACAG	0.0001	-10.7	0.0013	34	0.0513	1124.6	0.0233
20	2	WRKY30(WRKY)/colamp-WRKY30-DAP-Seq(GSE60143)/Homer	CGTTGACTTN	0.0001	-10.59	0.0014	40	0.0603	1430.6	0.0296
20	2	Esrrb(NR)/mES-Esrrb-ChIP-Seq(GSE11431)/Homer	KTGACCTTGA	0.0001	-10.54	0.0014	70	0.1056	3068.6	0.0634
20	2	AP-2alpha(AP2)/Hela-AP2alpha-ChIP-Seq(GSE31477)/Homer	ATGCCCTGAGGC	0.0001	-10.46	0.0014	34	0.0513	1138	0.0235
20	2	AT3G42860(zfGRF)/col-AT3G42860-DAP-Seq(GSE60143)/Homer	CGTTGACTTN	0.0001	-10.33	0.0015	37	0.0558	1295.3	0.0268
20	2	ATHB40(HB)/col-ATHB40-DAP-Seq(GSE60143)/Homer	HCAATWATTG	0.0001	-10.18	0.0017	123	0.1855	6309.9	0.1305
20	2	SPL5(SBP)/colamp-SPL5-DAP-Seq(GSE60143)/Homer	NNHGTACGGHNN	0.0001	-10.15	0.0017	79	0.1192	3630.2	0.0751
20	2	NFAT(RHD)/Jurkat-NFATC1-ChIP-Seq(Jolma_et_al.)/Homer	ATTTTCCATT	0.0001	-9.948	0.0019	100	0.1508	4915.2	0.1016
20	2	Tcf21(bHLH)/ArterySmoothMuscle-Tcf21-ChIP-Seq(GSE61369)/Homer	NAACAGCTGG	0.0001	-9.92	0.0019	63	0.095	2729.1	0.0564
20	2	EBF1(EBF)/Near-E2A-ChIP-Seq(GSE21512)/Homer	GTCCCCWGGGGA	0.0001	-9.425	0.003	40	0.0603	1510.9	0.0312
20	2	HNF1b(Homeobox)/PDAC-HNF1B-ChIP-Seq(GSE64557)/Homer	GTTAATNATTAA	0.0001	-9.324	0.0032	30	0.0452	1008.6	0.0209
20	2	HAT5(Homeobox)/colamp-HAT5-DAP-Seq(GSE60143)/Homer	DCAATWATTG	0.001	-8.797	0.0052	36	0.0543	1346.1	0.0278
20	2	ATHB18(Homeobox)/colamp-ATHB18-DAP-Seq(GSE60143)/Homer	YCAATSATTG	0.001	-8.643	0.0058	36	0.0543	1357.3	0.0281
20	2	M1BP(Zf)/S2R+-M1BP-ChIP-Seq(GSE49842)/Homer	CAGTGTGACCGT	0.001	-8.426	0.007	18	0.0271	493	0.0102
20	2	Pitx1:Ebox(Homeobox,bHLH)/Hindlimb-Pitx1-ChIP-Seq(GSE41591)/Homer	YTAATTRAWWCCAGATGT	0.001	-8.316	0.0075	31	0.0468	1121.8	0.0232
20	2	Ets1-distal(ETS)/CD4+-PolII-ChIP-Seq(Barski_et_al.)/Homer	MACAGGAAGT	0.001	-7.968	0.0103	22	0.0332	697.8	0.0144
20	2	SeqBias: CG bias	SSSSSSSSSS	0.001	-7.919	0.0105	439	0.6621	28904.4	0.5976
20	2	Atoh1(bHLH)/Cerebellum-Atoh1-ChIP-Seq(GSE22111)/Homer	VNRVCAGCTGGY	0.001	-7.611	0.0138	74	0.1116	3635.9	0.0752
20	2	Tcf3(HMG)/mES-Tcf3-ChIP-Seq(GSE11724)/Homer	ASWTCAAAGG	0.001	-7.553	0.0142	38	0.0573	1549.3	0.032
20	2	AARE(HLH)/mES-cMyc-ChIP-Seq/Homer	GATTGCATCA	0.001	-7.362	0.0167	27	0.0407	980.8	0.0203
20	2	GATA12(C2C2gata)/col-GATA12-DAP-Seq(GSE60143)/Homer	YAGATCTRAW	0.001	-7.083	0.0215	56	0.0845	2622.2	0.0542
20	2	GATA4(C2C2gata)/col-GATA4-DAP-Seq(GSE60143)/Homer	DDWTYAGATCTR	0.001	-6.956	0.0237	82	0.1237	4218.2	0.0872
20	2	p63(p53)/Keratinocyte-p63-ChIP-Seq(GSE17611)/Homer	NNDRCATGYCYNRRCATGYH	0.001	-6.955	0.0237	31	0.0468	1219.7	0.0252
20	3	TCP7(TCP)/col-TCP7-DAP-Seq(GSE60143)/Homer	GTGGGSCCCACHHNN	1e-05	-12.06	0.0053	18	0.0667	922.9	0.0191
20	3	SPL5(SBP)/colamp-SPL5-DAP-Seq(GSE60143)/Homer	NNHGTACGGHNN	0.0001	-9.427	0.0371	39	0.1444	3661	0.0756
20	3	Esrrb(NR)/mES-Esrrb-ChIP-Seq(GSE11431)/Homer	KTGACCTTGA	0.001	-6.969	0.289	30	0.1111	2907.3	0.06
20	4	HDG1(Homeobox)/col100-HDG1-DAP-Seq(GSE60143)/Homer	DDYAATTAATGH	1e-07	-16.67	0.0001	66	0.1507	3622.5	0.0749
20	4	TCFL2(HMG)/K562-TCF7L2-ChIP-Seq(GSE29196)/Homer	ACWTCAAAGG	0.0001	-11.36	0.0054	16	0.0365	480.3	0.0099
20	4	TCP7(TCP)/col-TCP7-DAP-Seq(GSE60143)/Homer	GTGGGSCCCACHHNN	0.0001	-10.96	0.0054	24	0.0548	988	0.0204
20	4	Tcf3(HMG)/mES-Tcf3-ChIP-Seq(GSE11724)/Homer	ASWTCAAAGG	0.0001	-10.15	0.009	30	0.0685	1464.8	0.0303
20	4	GATA4(C2C2gata)/col-GATA4-DAP-Seq(GSE60143)/Homer	DDWTYAGATCTR	0.001	-9.135	0.0199	61	0.1393	4113.7	0.0851
20	4	Reverb(NR),DR2/RAW-Reverba.biotin-ChIP-Seq(GSE45914)/Homer	GTRGGTCASTGGGTCA	0.001	-9.093	0.0199	10	0.0228	248.1	0.0051
20	4	GATA15(C2C2gata)/col-GATA15-DAP-Seq(GSE60143)/Homer	KATGATCA	0.001	-9.057	0.0199	117	0.2671	9367.4	0.1938
20	4	Zfp281(Zf)/ES-Zfp281-ChIP-Seq(GSE81042)/Homer	CCCCTCCCCCAC	0.001	-8.495	0.0236	13	0.0297	432.4	0.0089
20	4	Tcf4(HMG)/Hct116-Tcf4-ChIP-Seq(SRA012054)/Homer	ASATCAAAGGVA	0.001	-8.378	0.0236	39	0.089	2340.5	0.0484
20	4	Ascl1(bHLH)/NeuralTubes-Ascl1-ChIP-Seq(GSE55840)/Homer	NNVVCAGCTGBN	0.001	-8.15	0.0266	63	0.1438	4448.3	0.092
20	4	ZBTB18(Zf)/HEK293-ZBTB18.GFP-ChIP-Seq(GSE58341)/Homer	AACATCTGGA	0.001	-8.111	0.0266	33	0.0753	1885.5	0.039
20	4	SPL5(SBP)/colamp-SPL5-DAP-Seq(GSE60143)/Homer	NNHGTACGGHNN	0.001	-8.051	0.0266	52	0.1187	3487.1	0.0721
20	4	NeuroD1(bHLH)/Islet-NeuroD1-ChIP-Seq(GSE30298)/Homer	GCCATCTGTT	0.001	-7.801	0.029	41	0.0936	2578	0.0533
20	4	NeuroG2(bHLH)/Fibroblast-NeuroG2-ChIP-Seq(GSE75910)/Homer	ACCATCTGTT	0.001	-7.751	0.029	77	0.1758	5808.1	0.1202
20	4	TCP1(TCP)/col-TCP1-DAP-Seq(GSE60143)/Homer	GGGGGCCCMMCN	0.001	-7.568	0.0318	16	0.0365	670.2	0.0139
20	4	Tcf21(bHLH)/ArterySmoothMuscle-Tcf21-ChIP-Seq(GSE61369)/Homer	NAACAGCTGG	0.001	-7.34	0.0374	44	0.1005	2897.8	0.06
20	4	WRKY43(WRKY)/colamp-WRKY43-DAP-Seq(GSE60143)/Homer	NCGTTGACTTTT	0.001	-7.29	0.0374	30	0.0685	1735.2	0.0359
20	4	HDG7(HB)/col-HDG7-DAP-Seq(GSE60143)/Homer	WGCATTTAATGC	0.001	-7.097	0.0424	21	0.0479	1058.6	0.0219
20	4	Pitx1:Ebox(Homeobox,bHLH)/Hindlimb-Pitx1-ChIP-Seq(GSE41591)/Homer	YTAATTRAWWCCAGATGT	0.001	-7.069	0.0424	22	0.0502	1135.6	0.0235
20	4	HAT5(Homeobox)/colamp-HAT5-DAP-Seq(GSE60143)/Homer	DCAATWATTG	0.001	-7.01	0.0424	23	0.0525	1216.7	0.0252
20	4	GATA(Zf),IR4/iTreg-Gata3-ChIP-Seq(GSE20898)/Homer	NAGATWNBNATCTNN	0.001	-6.976	0.0424	15	0.0342	641.7	0.0133
20	4	HNF4a(NR),DR1/HepG2-HNF4a-ChIP-Seq(GSE25021)/Homer	CARRGKBCAAAGTYCA	0.001	-6.911	0.0424	26	0.0594	1458.4	0.0302
20	5	WRKY26(WRKY)/colamp-WRKY26-DAP-Seq(GSE60143)/Homer	CGTTGACTWDKN	0.0001	-10.39	0.0284	16	0.1569	2286	0.0482
20	5	WRKY14(WRKY)/colamp-WRKY14-DAP-Seq(GSE60143)/Homer	NCGTTGACTTTN	0.0001	-9.939	0.0284	16	0.1569	2374.9	0.0501
20	5	WRKY43(WRKY)/colamp-WRKY43-DAP-Seq(GSE60143)/Homer	NCGTTGACTTTT	0.0001	-9.487	0.0284	13	0.1275	1699.5	0.0358
20	5	ATHB18(Homeobox)/colamp-ATHB18-DAP-Seq(GSE60143)/Homer	YCAATSATTG	0.0001	-9.352	0.0284	11	0.1078	1255.2	0.0265
20	5	WRKY45(WRKY)/col-WRKY45-DAP-Seq(GSE60143)/Homer	HNNNKTTGACTWWNH	0.001	-7.838	0.0727	13	0.1275	2013.1	0.0425
20	5	ZFX(Zf)/mES-Zfx-ChIP-Seq(GSE11431)/Homer	AGGCCTRG	0.001	-7.594	0.0773	14	0.1373	2342	0.0494
20	5	WRKY71(WRKY)/col-WRKY71-DAP-Seq(GSE60143)/Homer	CKTTGACYWW	0.001	-7.402	0.0803	18	0.1765	3582.8	0.0756
20	5	WRKY33(WRKY)/col-WRKY33-DAP-Seq(GSE60143)/Homer	CGTTGACYAW	0.001	-7.281	0.0803	19	0.1863	3936.1	0.083
20	5	ZNF711(Zf)/SHSY5Y-ZNF711-ChIP-Seq(GSE20673)/Homer	AGGCCTAG	0.001	-6.919	0.1013	17	0.1667	3419.5	0.0721
20	6	TCP7(TCP)/col-TCP7-DAP-Seq(GSE60143)/Homer	GTGGGSCCCACHHNN	1e-06	-14.13	0.0007	24	0.0593	884.5	0.0183
20	6	GATA12(C2C2gata)/col-GATA12-DAP-Seq(GSE60143)/Homer	YAGATCTRAW	1e-05	-12.2	0.0023	45	0.1111	2615.5	0.0541
20	6	Esrrb(NR)/mES-Esrrb-ChIP-Seq(GSE11431)/Homer	KTGACCTTGA	1e-05	-11.52	0.003	47	0.116	2859.1	0.0591
20	6	Chop(bZIP)/MEF-Chop-ChIP-Seq(GSE35681)/Homer	ATTGCATCAT	0.0001	-10.73	0.0051	37	0.0914	2099.9	0.0434
20	6	WRKY26(WRKY)/colamp-WRKY26-DAP-Seq(GSE60143)/Homer	CGTTGACTWDKN	0.0001	-10.67	0.0051	40	0.0988	2355.4	0.0487
20	6	WRKY14(WRKY)/colamp-WRKY14-DAP-Seq(GSE60143)/Homer	NCGTTGACTTTN	0.0001	-10.57	0.0051	40	0.0988	2366.3	0.0489
20	6	Pitx1:Ebox(Homeobox,bHLH)/Hindlimb-Pitx1-ChIP-Seq(GSE41591)/Homer	YTAATTRAWWCCAGATGT	0.0001	-9.754	0.0076	23	0.0568	1083	0.0224
20	6	E2F1(E2F)/Hela-E2F1-ChIP-Seq(GSE22478)/Homer	CWGGCGGGAA	0.0001	-9.612	0.0077	13	0.0321	417.7	0.0086
20	6	TCFL2(HMG)/K562-TCF7L2-ChIP-Seq(GSE29196)/Homer	ACWTCAAAGG	0.0001	-9.502	0.0077	14	0.0346	482.1	0.01
20	6	TCP1(TCP)/col-TCP1-DAP-Seq(GSE60143)/Homer	GGGGGCCCMMCN	0.001	-9.081	0.0105	15	0.037	566.5	0.0117
20	6	WRKY43(WRKY)/colamp-WRKY43-DAP-Seq(GSE60143)/Homer	NCGTTGACTTTT	0.001	-8.956	0.0108	31	0.0765	1781.3	0.0368
20	6	M1BP(Zf)/S2R+-M1BP-ChIP-Seq(GSE49842)/Homer	CAGTGTGACCGT	0.001	-8.192	0.0213	13	0.0321	483	0.01
20	6	p63(p53)/Keratinocyte-p63-ChIP-Seq(GSE17611)/Homer	NNDRCATGYCYNRRCATGYH	0.001	-7.811	0.0287	22	0.0543	1161.8	0.024
20	6	WRKY3(WRKY)/col-WRKY3-DAP-Seq(GSE60143)/Homer	NCKTTGACYDDN	0.001	-7.722	0.0292	42	0.1037	2897.4	0.0599
20	6	Barx1(Homeobox)/Stomach-Barx1.3xFlag-ChIP-Seq(GSE69483)/Homer	AAACMATTAN	0.001	-7.578	0.0314	47	0.116	3385	0.07
20	6	TGA1(bZIP)/colamp-TGA1-DAP-Seq(GSE60143)/Homer	TGACGTCAKC	0.001	-7.553	0.0314	36	0.0889	2377	0.0492
20	6	WRKY33(WRKY)/col-WRKY33-DAP-Seq(GSE60143)/Homer	CGTTGACYAW	0.001	-7.551	0.0314	51	0.1259	3768.4	0.0779
20	6	Atf4(bZIP)/MEF-Atf4-ChIP-Seq(GSE35681)/Homer	MTGATGCAAT	0.001	-7.25	0.0364	39	0.0963	2690.8	0.0556
20	6	Pax7(Paired,Homeobox),longest/Myoblast-Pax7-ChIP-Seq(GSE25064)/Homer	NTAATTDGCYAATTANNWWD	0.001	-7.183	0.0368	7	0.0173	174.9	0.0036
20	6	WRKY31(WRKY)/colamp-WRKY31-DAP-Seq(GSE60143)/Homer	NCGTTGACTWWK	0.001	-7.142	0.0368	46	0.1136	3360.4	0.0695
20	6	NFAT(RHD)/Jurkat-NFATC1-ChIP-Seq(Jolma_et_al.)/Homer	ATTTTCCATT	0.001	-7.054	0.0379	63	0.1556	5034.9	0.1041
20	6	YY1(Zf)/Promoter/Homer	CAAGATGGCGGC	0.001	-7.016	0.0379	10	0.0247	351.5	0.0073
20	7	TCP7(TCP)/col-TCP7-DAP-Seq(GSE60143)/Homer	GTGGGSCCCACHHNN	1e-07	-18.21	0	32	0.0612	907.8	0.0189
20	7	E2F1(E2F)/Hela-E2F1-ChIP-Seq(GSE22478)/Homer	CWGGCGGGAA	1e-07	-17.13	0	19	0.0363	363.8	0.0076
20	7	TATA-Box(TBP)/Promoter/Homer	CCTTTTAWAGSC	1e-07	-16.48	0	124	0.2371	7128	0.1488
20	7	Chop(bZIP)/MEF-Chop-ChIP-Seq(GSE35681)/Homer	ATTGCATCAT	1e-05	-12.27	0.0011	41	0.0784	1736.9	0.0363
20	7	HDG1(Homeobox)/col100-HDG1-DAP-Seq(GSE60143)/Homer	DDYAATTAATGH	0.0001	-11.08	0.0029	83	0.1587	4761.7	0.0994
20	7	ELT-3(Gata)/cElegans-L1-ELT3-ChIP-Seq(modEncode)/Homer	AWTGATAAGA	0.0001	-10.48	0.0043	56	0.1071	2888	0.0603
20	7	AP-2gamma(AP2)/MCF7-TFAP2C-ChIP-Seq(GSE21234)/Homer	SCCTSAGGSCAW	0.0001	-9.652	0.0085	35	0.0669	1560	0.0326
20	7	NFAT(RHD)/Jurkat-NFATC1-ChIP-Seq(Jolma_et_al.)/Homer	ATTTTCCATT	0.0001	-9.59	0.0085	79	0.1511	4667.9	0.0974
20	7	ZNF264(Zf)/HEK293-ZNF264.GFP-ChIP-Seq(GSE58341)/Homer	RGGGCACTAACY	0.001	-9.087	0.0116	38	0.0727	1802.6	0.0376
20	7	WRKY14(WRKY)/colamp-WRKY14-DAP-Seq(GSE60143)/Homer	NCGTTGACTTTN	0.001	-8.944	0.012	45	0.086	2288.4	0.0478
20	7	GATA12(C2C2gata)/col-GATA12-DAP-Seq(GSE60143)/Homer	YAGATCTRAW	0.001	-8.86	0.012	44	0.0841	2228.1	0.0465
20	7	GATA4(C2C2gata)/col-GATA4-DAP-Seq(GSE60143)/Homer	DDWTYAGATCTR	0.001	-8.77	0.012	63	0.1205	3591.2	0.075
20	7	M1BP(Zf)/S2R+-M1BP-ChIP-Seq(GSE49842)/Homer	CAGTGTGACCGT	0.001	-8.548	0.0137	16	0.0306	507.1	0.0106
20	7	WRKY65(WRKY)/colamp-WRKY65-DAP-Seq(GSE60143)/Homer	AWWWAGTCAACG	0.001	-8.524	0.0137	46	0.088	2402.9	0.0502
20	7	WRKY43(WRKY)/colamp-WRKY43-DAP-Seq(GSE60143)/Homer	NCGTTGACTTTT	0.001	-8.458	0.0137	36	0.0688	1727.3	0.0361
20	7	Pitx1:Ebox(Homeobox,bHLH)/Hindlimb-Pitx1-ChIP-Seq(GSE41591)/Homer	YTAATTRAWWCCAGATGT	0.001	-8.104	0.0174	25	0.0478	1050.9	0.0219
20	7	Unknown1(NR/Ini-like)/Drosophila-Promoters/Homer	MYGGTCACACTG	0.001	-7.933	0.0195	15	0.0287	483.9	0.0101
20	7	TCFL2(HMG)/K562-TCF7L2-ChIP-Seq(GSE29196)/Homer	ACWTCAAAGG	0.001	-7.794	0.0211	14	0.0268	437.4	0.0091
20	7	TCP1(TCP)/col-TCP1-DAP-Seq(GSE60143)/Homer	GGGGGCCCMMCN	0.001	-7.75	0.0211	17	0.0325	601	0.0125
20	7	WRKY26(WRKY)/colamp-WRKY26-DAP-Seq(GSE60143)/Homer	CGTTGACTWDKN	0.001	-7.637	0.0222	43	0.0822	2291.3	0.0478
20	7	WRKY22(WRKY)/colamp-WRKY22-DAP-Seq(GSE60143)/Homer	WWAAAGTCAACK	0.001	-7.572	0.0226	50	0.0956	2799.2	0.0584
20	7	Atf4(bZIP)/MEF-Atf4-ChIP-Seq(GSE35681)/Homer	MTGATGCAAT	0.001	-7.505	0.0231	44	0.0841	2377.2	0.0496
20	7	NeuroG2(bHLH)/Fibroblast-NeuroG2-ChIP-Seq(GSE75910)/Homer	ACCATCTGTT	0.001	-7.428	0.0238	82	0.1568	5240.8	0.1094
20	7	WRKY3(WRKY)/col-WRKY3-DAP-Seq(GSE60143)/Homer	NCKTTGACYDDN	0.001	-7.407	0.0238	51	0.0975	2893.8	0.0604
20	7	Tcf21(bHLH)/ArterySmoothMuscle-Tcf21-ChIP-Seq(GSE61369)/Homer	NAACAGCTGG	0.001	-7.299	0.0249	45	0.086	2473.5	0.0516
20	7	TATA-box/Drosophila-Promoters/Homer	CTATAAAAGCSV	0.001	-7.268	0.0249	20	0.0382	804.4	0.0168
20	7	AP-2alpha(AP2)/Hela-AP2alpha-ChIP-Seq(GSE31477)/Homer	ATGCCCTGAGGC	0.001	-7.141	0.0271	26	0.0497	1188.8	0.0248
20	7	PPARE(NR),DR1/3T3L1-Pparg-ChIP-Seq(GSE13511)/Homer	TGACCTTTGCCCCA	0.001	-7.055	0.0284	55	0.1052	3236	0.0675
20	8	FAR1(FAR1)/col-FAR1-DAP-Seq(GSE60143)/Homer	TKNNNYYCACGCGCY	0.0001	-9.982	0.0426	9	0.0383	338.5	0.0069
20	8	Reverb(NR),DR2/RAW-Reverba.biotin-ChIP-Seq(GSE45914)/Homer	GTRGGTCASTGGGTCA	0.001	-9.084	0.0523	7	0.0298	221.3	0.0045
20	8	Chop(bZIP)/MEF-Chop-ChIP-Seq(GSE35681)/Homer	ATTGCATCAT	0.001	-8.063	0.0968	20	0.0851	1733.2	0.0355
20	8	MYB3R1(MYB)/col-MYB3R1-DAP-Seq(GSE60143)/Homer	WWDTDACCGTTR	0.001	-7.61	0.1142	34	0.1447	3869.9	0.0792
20	8	FHY3(FAR1)/Arabidopsis-FHY3-ChIP-Seq(GSE30711)/Homer	HHCACGCGCBTN	0.001	-7.227	0.134	13	0.0553	940	0.0192
20	8	HDG1(Homeobox)/col100-HDG1-DAP-Seq(GSE60143)/Homer	DDYAATTAATGH	0.001	-7.225	0.134	39	0.166	4762.4	0.0975
20	8	MYB3R5(MYB)/col-MYB3R5-DAP-Seq(GSE60143)/Homer	THYAACGGTHAWAWT	0.001	-7.16	0.134	13	0.0553	948	0.0194
20	8	Atf4(bZIP)/MEF-Atf4-ChIP-Seq(GSE35681)/Homer	MTGATGCAAT	0.001	-7.049	0.134	23	0.0979	2310.1	0.0473
20	8	HDG7(HB)/col-HDG7-DAP-Seq(GSE60143)/Homer	WGCATTTAATGC	0.001	-6.996	0.134	16	0.0681	1345.9	0.0276
25	1	E2F1(E2F)/Hela-E2F1-ChIP-Seq(GSE22478)/Homer	CWGGCGGGAA	1e-05	-11.64	0.0081	12	0.041	411.1	0.0083
25	1	ZBTB18(Zf)/HEK293-ZBTB18.GFP-ChIP-Seq(GSE58341)/Homer	AACATCTGGA	0.0001	-10.95	0.0081	24	0.0819	1518.8	0.0308
25	1	NFAT(RHD)/Jurkat-NFATC1-ChIP-Seq(Jolma_et_al.)/Homer	ATTTTCCATT	0.0001	-10.56	0.0081	56	0.1911	5388.6	0.1094
25	1	TGA1(bZIP)/colamp-TGA1-DAP-Seq(GSE60143)/Homer	TGACGTCAKC	0.0001	-10.03	0.0102	30	0.1024	2266	0.046
25	1	Pitx1:Ebox(Homeobox,bHLH)/Hindlimb-Pitx1-ChIP-Seq(GSE41591)/Homer	YTAATTRAWWCCAGATGT	0.0001	-9.517	0.0136	20	0.0683	1247.5	0.0253
25	1	TGA4(bZIP)/colamp-TGA4-DAP-Seq(GSE60143)/Homer	RTGACGTCAKCW	0.001	-8.68	0.0261	24	0.0819	1760.8	0.0358
25	1	SPL5(SBP)/colamp-SPL5-DAP-Seq(GSE60143)/Homer	NNHGTACGGHNN	0.001	-8.651	0.0261	39	0.1331	3552.5	0.0721
25	1	Rfx5(HTH)/GM12878-Rfx5-ChIP-Seq(GSE31477)/Homer	SCCTAGCAACAG	0.001	-8.246	0.0302	16	0.0546	963.9	0.0196
25	1	Atoh1(bHLH)/Cerebellum-Atoh1-ChIP-Seq(GSE22111)/Homer	VNRVCAGCTGGY	0.001	-8.243	0.0302	35	0.1195	3122.1	0.0634
25	1	GATA4(C2C2gata)/col-GATA4-DAP-Seq(GSE60143)/Homer	DDWTYAGATCTR	0.001	-7.866	0.0354	41	0.1399	3954.7	0.0803
25	1	NeuroG2(bHLH)/Fibroblast-NeuroG2-ChIP-Seq(GSE75910)/Homer	ACCATCTGTT	0.001	-7.476	0.0475	49	0.1672	5101.7	0.1036
25	1	Tcf21(bHLH)/ArterySmoothMuscle-Tcf21-ChIP-Seq(GSE61369)/Homer	NAACAGCTGG	0.001	-7.287	0.0526	28	0.0956	2419	0.0491
25	2	Chop(bZIP)/MEF-Chop-ChIP-Seq(GSE35681)/Homer	ATTGCATCAT	1e-08	-19.16	0	56	0.0972	2011.5	0.0412
25	2	E2F1(E2F)/Hela-E2F1-ChIP-Seq(GSE22478)/Homer	CWGGCGGGAA	1e-07	-16.52	0	20	0.0347	386.3	0.0079
25	2	ZBTB18(Zf)/HEK293-ZBTB18.GFP-ChIP-Seq(GSE58341)/Homer	AACATCTGGA	1e-06	-15.96	0	46	0.0799	1650.5	0.0338
25	2	TCP7(TCP)/col-TCP7-DAP-Seq(GSE60143)/Homer	GTGGGSCCCACHHNN	1e-06	-14.74	0.0001	29	0.0503	833.7	0.0171
25	2	ZFX(Zf)/mES-Zfx-ChIP-Seq(GSE11431)/Homer	AGGCCTRG	1e-05	-13.14	0.0004	49	0.0851	2006.7	0.0411
25	2	M1BP(Zf)/S2R+-M1BP-ChIP-Seq(GSE49842)/Homer	CAGTGTGACCGT	1e-05	-13.06	0.0004	20	0.0347	484.6	0.0099
25	2	Atf4(bZIP)/MEF-Atf4-ChIP-Seq(GSE35681)/Homer	MTGATGCAAT	1e-05	-12.5	0.0005	59	0.1024	2666.2	0.0546
25	2	HDG1(Homeobox)/col100-HDG1-DAP-Seq(GSE60143)/Homer	DDYAATTAATGH	1e-05	-12.32	0.0005	94	0.1632	4991.1	0.1023
25	2	NeuroG2(bHLH)/Fibroblast-NeuroG2-ChIP-Seq(GSE75910)/Homer	ACCATCTGTT	1e-05	-11.87	0.0007	98	0.1701	5325.7	0.1091
25	2	NFAT(RHD)/Jurkat-NFATC1-ChIP-Seq(Jolma_et_al.)/Homer	ATTTTCCATT	0.0001	-11.35	0.0011	96	0.1667	5254.4	0.1077
25	2	ATHB18(Homeobox)/colamp-ATHB18-DAP-Seq(GSE60143)/Homer	YCAATSATTG	0.0001	-11.32	0.0011	38	0.066	1495.3	0.0306
25	2	ATHB40(HB)/col-ATHB40-DAP-Seq(GSE60143)/Homer	HCAATWATTG	0.0001	-11.1	0.0012	123	0.2135	7217.3	0.1479
25	2	AP-2gamma(AP2)/MCF7-TFAP2C-ChIP-Seq(GSE21234)/Homer	SCCTSAGGSCAW	0.0001	-11.05	0.0012	35	0.0608	1342.2	0.0275
25	2	HNF1b(Homeobox)/PDAC-HNF1B-ChIP-Seq(GSE64557)/Homer	GTTAATNATTAA	0.0001	-10.89	0.0012	33	0.0573	1241	0.0254
25	2	Unknown1(NR/Ini-like)/Drosophila-Promoters/Homer	MYGGTCACACTG	0.0001	-10.18	0.0023	18	0.0312	497.4	0.0102
25	2	Atoh1(bHLH)/Cerebellum-Atoh1-ChIP-Seq(GSE22111)/Homer	VNRVCAGCTGGY	0.0001	-9.803	0.0032	65	0.1128	3326.4	0.0682
25	2	Tcf21(bHLH)/ArterySmoothMuscle-Tcf21-ChIP-Seq(GSE61369)/Homer	NAACAGCTGG	0.0001	-9.701	0.0033	54	0.0938	2614.6	0.0536
25	2	WRKY30(WRKY)/colamp-WRKY30-DAP-Seq(GSE60143)/Homer	CGTTGACTTN	0.0001	-9.652	0.0033	33	0.0573	1323.3	0.0271
25	2	GATA12(C2C2gata)/col-GATA12-DAP-Seq(GSE60143)/Homer	YAGATCTRAW	0.0001	-9.607	0.0033	53	0.092	2559	0.0524
25	2	EBF1(EBF)/Near-E2A-ChIP-Seq(GSE21512)/Homer	GTCCCCWGGGGA	0.0001	-9.518	0.0034	34	0.059	1391.3	0.0285
25	2	Tcf3(HMG)/mES-Tcf3-ChIP-Seq(GSE11724)/Homer	ASWTCAAAGG	0.0001	-9.314	0.004	36	0.0625	1525.5	0.0313
25	2	GATA4(C2C2gata)/col-GATA4-DAP-Seq(GSE60143)/Homer	DDWTYAGATCTR	0.0001	-9.298	0.004	78	0.1354	4275.2	0.0876
25	2	MYB3R1(MYB)/col-MYB3R1-DAP-Seq(GSE60143)/Homer	WWDTDACCGTTR	0.001	-9.173	0.0042	66	0.1146	3468.3	0.0711
25	2	ZNF711(Zf)/SHSY5Y-ZNF711-ChIP-Seq(GSE20673)/Homer	AGGCCTAG	0.001	-9.104	0.0043	60	0.1042	3073	0.063
25	2	COUP-TFII(NR)/Artia-Nr2f2-ChIP-Seq(GSE46497)/Homer	AGRGGTCA	0.001	-8.789	0.0056	111	0.1927	6718.4	0.1376
25	2	AP-2alpha(AP2)/Hela-AP2alpha-ChIP-Seq(GSE31477)/Homer	ATGCCCTGAGGC	0.001	-8.663	0.0061	26	0.0451	990.1	0.0203
25	2	TATA-Box(TBP)/Promoter/Homer	CCTTTTAWAGSC	0.001	-8.615	0.0062	116	0.2014	7118.5	0.1458
25	2	NF1:FOXA1(CTF,Forkhead)/LNCAP-FOXA1-ChIP-Seq(GSE27824)/Homer	WNTGTTTRYTTTGGCA	0.001	-8.596	0.0062	12	0.0208	284.9	0.0058
25	2	WIP5(C2H2)/colamp-WIP5-DAP-Seq(GSE60143)/Homer	TDTTCTCMAGGT	0.001	-8.52	0.0063	76	0.1319	4243.6	0.0869
25	2	SeqBias: CG bias	SSSSSSSSSS	0.001	-8.361	0.0072	366	0.6354	27468.3	0.5628
25	2	TCFL2(HMG)/K562-TCF7L2-ChIP-Seq(GSE29196)/Homer	ACWTCAAAGG	0.001	-8.239	0.0079	16	0.0278	482.7	0.0099
25	2	Ascl1(bHLH)/NeuralTubes-Ascl1-ChIP-Seq(GSE55840)/Homer	NNVVCAGCTGBN	0.001	-8.146	0.0084	69	0.1198	3808	0.078
25	2	Rfx5(HTH)/GM12878-Rfx5-ChIP-Seq(GSE31477)/Homer	SCCTAGCAACAG	0.001	-8.145	0.0084	29	0.0503	1199.6	0.0246
25	2	Esrrb(NR)/mES-Esrrb-ChIP-Seq(GSE11431)/Homer	KTGACCTTGA	0.001	-8.096	0.0084	58	0.1007	3059.4	0.0627
25	2	TATA-box/Drosophila-Promoters/Homer	CTATAAAAGCSV	0.001	-8.062	0.0084	22	0.0382	805	0.0165
25	2	GATA20(C2C2gata)/colamp-GATA20-DAP-Seq(GSE60143)/Homer	TNGATCNDNM	0.001	-7.878	0.0097	200	0.3472	13765	0.282
25	2	AT3G42860(zfGRF)/col-AT3G42860-DAP-Seq(GSE60143)/Homer	CGTTGACTTN	0.001	-7.791	0.0103	29	0.0503	1226.1	0.0251
25	2	ELT-3(Gata)/cElegans-L1-ELT3-ChIP-Seq(modEncode)/Homer	AWTGATAAGA	0.001	-7.726	0.0107	61	0.1059	3311.6	0.0678
25	2	HAT5(Homeobox)/colamp-HAT5-DAP-Seq(GSE60143)/Homer	DCAATWATTG	0.001	-7.724	0.0107	33	0.0573	1474.7	0.0302
25	2	WRKY22(WRKY)/colamp-WRKY22-DAP-Seq(GSE60143)/Homer	WWAAAGTCAACK	0.001	-7.661	0.0109	58	0.1007	3114.8	0.0638
25	2	Tgif2(Homeobox)/mES-Tgif2-ChIP-Seq(GSE55404)/Homer	TGTCANYT	0.001	-7.486	0.0126	227	0.3941	16040	0.3286
25	2	SPL5(SBP)/colamp-SPL5-DAP-Seq(GSE60143)/Homer	NNHGTACGGHNN	0.001	-7.452	0.0127	62	0.1076	3417.8	0.07
25	2	TCP1(TCP)/col-TCP1-DAP-Seq(GSE60143)/Homer	GGGGGCCCMMCN	0.001	-7.139	0.017	15	0.026	483.6	0.0099
25	2	Tal1	CATCTG	0.001	-7.123	0.017	100	0.1736	6206.8	0.1272
25	2	E2F3(E2F)/MEF-E2F3-ChIP-Seq(GSE71376)/Homer	BTKGGCGGGAAA	0.001	-6.949	0.0197	27	0.0469	1173.6	0.024
25	3	Esrrb(NR)/mES-Esrrb-ChIP-Seq(GSE11431)/Homer	KTGACCTTGA	1e-05	-11.61	0.0084	30	0.1299	2639.1	0.054
25	3	ZBTB18(Zf)/HEK293-ZBTB18.GFP-ChIP-Seq(GSE58341)/Homer	AACATCTGGA	0.0001	-11.39	0.0084	22	0.0952	1620.9	0.0332
25	3	E2F1(E2F)/Hela-E2F1-ChIP-Seq(GSE22478)/Homer	CWGGCGGGAA	0.0001	-11.29	0.0084	10	0.0433	367.9	0.0075
25	3	TCP7(TCP)/col-TCP7-DAP-Seq(GSE60143)/Homer	GTGGGSCCCACHHNN	0.0001	-10.13	0.0092	14	0.0606	811.5	0.0166
25	3	Chop(bZIP)/MEF-Chop-ChIP-Seq(GSE35681)/Homer	ATTGCATCAT	0.0001	-9.276	0.0173	22	0.0952	1869.4	0.0383
25	3	Zfp281(Zf)/ES-Zfp281-ChIP-Seq(GSE81042)/Homer	CCCCTCCCCCAC	0.001	-8.415	0.034	8	0.0346	334.1	0.0068
25	3	M1BP(Zf)/S2R+-M1BP-ChIP-Seq(GSE49842)/Homer	CAGTGTGACCGT	0.001	-8.217	0.0356	9	0.039	436.1	0.0089
25	3	ZNF264(Zf)/HEK293-ZNF264.GFP-ChIP-Seq(GSE58341)/Homer	RGGGCACTAACY	0.001	-8.121	0.0356	20	0.0866	1755.9	0.036
25	3	EBF1(EBF)/Near-E2A-ChIP-Seq(GSE21512)/Homer	GTCCCCWGGGGA	0.001	-7.606	0.051	16	0.0693	1291.5	0.0264
25	3	Erra(NR)/HepG2-Erra-ChIP-Seq(GSE31477)/Homer	CAAAGGTCAG	0.001	-7.038	0.0809	43	0.1861	5570.1	0.1141
25	4	HDG1(Homeobox)/col100-HDG1-DAP-Seq(GSE60143)/Homer	DDYAATTAATGH	1e-08	-19.22	0	72	0.187	4460.1	0.0912
25	4	TCFL2(HMG)/K562-TCF7L2-ChIP-Seq(GSE29196)/Homer	ACWTCAAAGG	1e-06	-13.91	0.0004	16	0.0416	451.3	0.0092
25	4	Pitx1:Ebox(Homeobox,bHLH)/Hindlimb-Pitx1-ChIP-Seq(GSE41591)/Homer	YTAATTRAWWCCAGATGT	1e-05	-12.79	0.0009	26	0.0675	1164.3	0.0238
25	4	Chop(bZIP)/MEF-Chop-ChIP-Seq(GSE35681)/Homer	ATTGCATCAT	0.0001	-11.48	0.0024	35	0.0909	1986.1	0.0406
25	4	FAR1(FAR1)/col-FAR1-DAP-Seq(GSE60143)/Homer	TKNNNYYCACGCGCY	0.0001	-10.53	0.0049	13	0.0338	405.1	0.0083
25	4	GATA4(C2C2gata)/col-GATA4-DAP-Seq(GSE60143)/Homer	DDWTYAGATCTR	0.0001	-10.21	0.0056	57	0.1481	4176.2	0.0854
25	4	ZBTB18(Zf)/HEK293-ZBTB18.GFP-ChIP-Seq(GSE58341)/Homer	AACATCTGGA	0.0001	-9.734	0.0078	30	0.0779	1729.6	0.0354
25	4	Tcf21(bHLH)/ArterySmoothMuscle-Tcf21-ChIP-Seq(GSE61369)/Homer	NAACAGCTGG	0.001	-9.155	0.0122	40	0.1039	2691.8	0.0551
25	4	Ascl1(bHLH)/NeuralTubes-Ascl1-ChIP-Seq(GSE55840)/Homer	NNVVCAGCTGBN	0.001	-8.966	0.0131	54	0.1403	4074.8	0.0834
25	4	Zfp281(Zf)/ES-Zfp281-ChIP-Seq(GSE81042)/Homer	CCCCTCCCCCAC	0.001	-8.943	0.0131	12	0.0312	411.1	0.0084
25	4	Rfx5(HTH)/GM12878-Rfx5-ChIP-Seq(GSE31477)/Homer	SCCTAGCAACAG	0.001	-8.585	0.0157	21	0.0545	1086.5	0.0222
25	4	HEB(bHLH)/mES-Heb-ChIP-Seq(GSE53233)/Homer	VCAGCTGBNN	0.001	-8.424	0.0169	65	0.1688	5294.4	0.1083
25	4	Atf4(bZIP)/MEF-Atf4-ChIP-Seq(GSE35681)/Homer	MTGATGCAAT	0.001	-8.338	0.017	38	0.0987	2611.2	0.0534
25	4	NeuroG2(bHLH)/Fibroblast-NeuroG2-ChIP-Seq(GSE75910)/Homer	ACCATCTGTT	0.001	-7.844	0.0258	66	0.1714	5514.7	0.1128
25	4	GATA15(C2C2gata)/col-GATA15-DAP-Seq(GSE60143)/Homer	KATGATCA	0.001	-7.829	0.0258	101	0.2623	9351.4	0.1913
25	4	Tcf3(HMG)/mES-Tcf3-ChIP-Seq(GSE11724)/Homer	ASWTCAAAGG	0.001	-7.819	0.0258	25	0.0649	1491.4	0.0305
25	4	Reverb(NR),DR2/RAW-Reverba.biotin-ChIP-Seq(GSE45914)/Homer	GTRGGTCASTGGGTCA	0.001	-7.747	0.0258	8	0.0208	221.1	0.0045
25	4	FOXA1:AR(Forkhead,NR)/LNCAP-AR-ChIP-Seq(GSE27824)/Homer	AGTAAACAAAAAAGAACAND	0.001	-7.658	0.0258	10	0.026	343.2	0.007
25	4	TCP7(TCP)/col-TCP7-DAP-Seq(GSE60143)/Homer	GTGGGSCCCACHHNN	0.001	-7.525	0.0262	17	0.0442	853.9	0.0175
25	4	TATA-Box(TBP)/Promoter/Homer	CCTTTTAWAGSC	0.001	-7.449	0.0268	81	0.2104	7219.3	0.1477
25	4	WRKY43(WRKY)/colamp-WRKY43-DAP-Seq(GSE60143)/Homer	NCGTTGACTTTT	0.001	-7.261	0.0309	27	0.0701	1730.6	0.0354
25	4	HDG7(HB)/col-HDG7-DAP-Seq(GSE60143)/Homer	WGCATTTAATGC	0.001	-7.219	0.0309	22	0.0571	1293.5	0.0265
25	4	WRKY65(WRKY)/colamp-WRKY65-DAP-Seq(GSE60143)/Homer	AWWWAGTCAACG	0.001	-7.175	0.0309	34	0.0883	2392.3	0.0489
25	4	FHY3(FAR1)/Arabidopsis-FHY3-ChIP-Seq(GSE30711)/Homer	HHCACGCGCBTN	0.001	-7.055	0.0332	18	0.0468	972.1	0.0199
25	5	ZFX(Zf)/mES-Zfx-ChIP-Seq(GSE11431)/Homer	AGGCCTRG	0.001	-7.679	0.4266	12	0.1348	2103	0.0433
25	5	ATHB18(Homeobox)/colamp-ATHB18-DAP-Seq(GSE60143)/Homer	YCAATSATTG	0.001	-7.61	0.4266	10	0.1124	1525.9	0.0314
25	5	WRKY43(WRKY)/colamp-WRKY43-DAP-Seq(GSE60143)/Homer	NCGTTGACTTTT	0.001	-7.429	0.4266	11	0.1236	1855.7	0.0382
25	6	Esrrb(NR)/mES-Esrrb-ChIP-Seq(GSE11431)/Homer	KTGACCTTGA	1e-08	-20.29	0	53	0.148	2933.6	0.0599
25	6	TCP7(TCP)/col-TCP7-DAP-Seq(GSE60143)/Homer	GTGGGSCCCACHHNN	1e-05	-12.57	0.0016	20	0.0559	813.9	0.0166
25	6	Nur77(NR)/K562-NR4A1-ChIP-Seq(GSE31363)/Homer	TGACCTTTNCNT	1e-05	-12.14	0.0016	24	0.067	1142.9	0.0234
25	6	WRKY26(WRKY)/colamp-WRKY26-DAP-Seq(GSE60143)/Homer	CGTTGACTWDKN	0.0001	-10.67	0.0053	38	0.1061	2512.7	0.0513
25	6	M1BP(Zf)/S2R+-M1BP-ChIP-Seq(GSE49842)/Homer	CAGTGTGACCGT	0.0001	-10.58	0.0053	14	0.0391	499.4	0.0102
25	6	COUP-TFII(NR)/Artia-Nr2f2-ChIP-Seq(GSE46497)/Homer	AGRGGTCA	0.0001	-10.2	0.0057	77	0.2151	6709.6	0.1371
25	6	GATA12(C2C2gata)/col-GATA12-DAP-Seq(GSE60143)/Homer	YAGATCTRAW	0.0001	-9.652	0.0085	37	0.1034	2539.4	0.0519
25	6	GATA4(C2C2gata)/col-GATA4-DAP-Seq(GSE60143)/Homer	DDWTYAGATCTR	0.0001	-9.582	0.0085	52	0.1453	4079.5	0.0834
25	6	Unknown1(NR/Ini-like)/Drosophila-Promoters/Homer	MYGGTCACACTG	0.0001	-9.288	0.0095	13	0.0363	494.4	0.0101
25	6	PPARE(NR),DR1/3T3L1-Pparg-ChIP-Seq(GSE13511)/Homer	TGACCTTTGCCCCA	0.0001	-9.232	0.0095	42	0.1173	3094.7	0.0632
25	6	WRKY3(WRKY)/col-WRKY3-DAP-Seq(GSE60143)/Homer	NCKTTGACYDDN	0.0001	-9.225	0.0095	42	0.1173	3095.4	0.0633
25	6	GATA20(C2C2gata)/colamp-GATA20-DAP-Seq(GSE60143)/Homer	TNGATCNDNM	0.001	-9.017	0.0095	131	0.3659	13484.9	0.2756
25	6	WRKY14(WRKY)/colamp-WRKY14-DAP-Seq(GSE60143)/Homer	NCGTTGACTTTN	0.001	-8.871	0.01	36	0.1006	2541.5	0.0519
25	6	WRKY18(WRKY)/col-WRKY18-DAP-Seq(GSE60143)/Homer	NNNTTGACYWNNNNN	0.001	-8.832	0.01	84	0.2346	7810.8	0.1596
25	6	WRKY71(WRKY)/col-WRKY71-DAP-Seq(GSE60143)/Homer	CKTTGACYWW	0.001	-8.824	0.01	48	0.1341	3779.9	0.0772
25	6	LHY(Myb)/Seedling-LHY-ChIP-Seq(GSE52175)/Homer	ADAAATATCT	0.001	-8.716	0.01	86	0.2402	8072.5	0.165
25	6	E2F1(E2F)/Hela-E2F1-ChIP-Seq(GSE22478)/Homer	CWGGCGGGAA	0.001	-8.644	0.01	11	0.0307	390.4	0.008
25	6	Pitx1:Ebox(Homeobox,bHLH)/Hindlimb-Pitx1-ChIP-Seq(GSE41591)/Homer	YTAATTRAWWCCAGATGT	0.001	-8.31	0.0126	21	0.0587	1195.5	0.0244
25	6	WRKY28(WRKY)/col-WRKY28-DAP-Seq(GSE60143)/Homer	BGTTGACTWH	0.001	-7.999	0.0163	74	0.2067	6837.5	0.1397
25	6	WRKY20(WRKY)/col-WRKY20-DAP-Seq(GSE60143)/Homer	CKTTGACYWD	0.001	-7.922	0.0167	47	0.1313	3825.2	0.0782
25	6	GATA15(C2C2gata)/col-GATA15-DAP-Seq(GSE60143)/Homer	KATGATCA	0.001	-7.83	0.0175	92	0.257	9009.6	0.1841
25	6	WRKY15(WRKY)/col-WRKY15-DAP-Seq(GSE60143)/Homer	VGTTGACTWW	0.001	-7.421	0.0251	56	0.1564	4909.8	0.1003
25	6	WRKY43(WRKY)/colamp-WRKY43-DAP-Seq(GSE60143)/Homer	NCGTTGACTTTT	0.001	-7.289	0.0274	28	0.0782	1959.7	0.04
25	6	NeuroD1(bHLH)/Islet-NeuroD1-ChIP-Seq(GSE30298)/Homer	GCCATCTGTT	0.001	-7.247	0.0274	32	0.0894	2364.5	0.0483
25	6	WRKY75(WRKY)/col-WRKY75-DAP-Seq(GSE60143)/Homer	CGTTGACTWW	0.001	-7.18	0.0281	54	0.1508	4735.4	0.0968
25	6	WRKY31(WRKY)/colamp-WRKY31-DAP-Seq(GSE60143)/Homer	NCGTTGACTWWK	0.001	-7.009	0.032	43	0.1201	3557.9	0.0727
25	6	WRKY33(WRKY)/col-WRKY33-DAP-Seq(GSE60143)/Homer	CGTTGACYAW	0.001	-6.988	0.032	47	0.1313	3997.4	0.0817
25	6	WRKY24(WRKY)/colamp-WRKY24-DAP-Seq(GSE60143)/Homer	CGTTGACTWW	0.001	-6.935	0.0321	50	0.1397	4339.9	0.0887
25	6	WRKY40(WRKY)/colamp-WRKY40-DAP-Seq(GSE60143)/Homer	AHWAGTCAAC	0.001	-6.923	0.0321	38	0.1061	3037.9	0.0621
25	7	TCP7(TCP)/col-TCP7-DAP-Seq(GSE60143)/Homer	GTGGGSCCCACHHNN	1e-11	-26.37	0	34	0.0728	828.9	0.0171
25	7	E2F1(E2F)/Hela-E2F1-ChIP-Seq(GSE22478)/Homer	CWGGCGGGAA	1e-08	-18.48	0	19	0.0407	377.4	0.0078
25	7	TATA-Box(TBP)/Promoter/Homer	CCTTTTAWAGSC	1e-07	-16.76	0	117	0.2505	7473.8	0.1545
25	7	TCFL2(HMG)/K562-TCF7L2-ChIP-Seq(GSE29196)/Homer	ACWTCAAAGG	1e-06	-13.91	0.0002	17	0.0364	413.3	0.0085
25	7	Chop(bZIP)/MEF-Chop-ChIP-Seq(GSE35681)/Homer	ATTGCATCAT	0.0001	-10.14	0.0073	35	0.0749	1723.1	0.0356
25	7	TCP1(TCP)/col-TCP1-DAP-Seq(GSE60143)/Homer	GGGGGCCCMMCN	0.0001	-10.09	0.0073	16	0.0343	501.4	0.0104
25	7	OCT:OCT(POU,Homeobox)/NPC-Brn1-ChIP-Seq(GSE35496)/Homer	ATGAATATTCATGAG	0.0001	-9.936	0.0073	6	0.0128	65.2	0.0013
25	7	M1BP(Zf)/S2R+-M1BP-ChIP-Seq(GSE49842)/Homer	CAGTGTGACCGT	0.0001	-9.75	0.0073	15	0.0321	461.6	0.0095
25	7	GATA4(C2C2gata)/col-GATA4-DAP-Seq(GSE60143)/Homer	DDWTYAGATCTR	0.001	-8.534	0.0201	59	0.1263	3775.5	0.078
25	7	Trl(Zf)/S2-GAGAfactor-ChIP-Seq(GSE40646)/Homer	RGAGAGAG	0.001	-8.312	0.0226	132	0.2827	10323.4	0.2134
25	7	Unknown1(NR/Ini-like)/Drosophila-Promoters/Homer	MYGGTCACACTG	0.001	-8.171	0.0237	14	0.03	476.6	0.0099
25	7	NFAT(RHD)/Jurkat-NFATC1-ChIP-Seq(Jolma_et_al.)/Homer	ATTTTCCATT	0.001	-8.1	0.0237	72	0.1542	4944.4	0.1022
25	7	ELT-3(Gata)/cElegans-L1-ELT3-ChIP-Seq(modEncode)/Homer	AWTGATAAGA	0.001	-8.073	0.0237	53	0.1135	3347.2	0.0692
25	7	TATA-box/Drosophila-Promoters/Homer	CTATAAAAGCSV	0.001	-7.915	0.024	19	0.0407	798.6	0.0165
25	7	NeuroG2(bHLH)/Fibroblast-NeuroG2-ChIP-Seq(GSE75910)/Homer	ACCATCTGTT	0.001	-7.872	0.024	70	0.1499	4811.1	0.0995
25	7	WRKY65(WRKY)/colamp-WRKY65-DAP-Seq(GSE60143)/Homer	AWWWAGTCAACG	0.001	-7.67	0.0269	41	0.0878	2433.8	0.0503
25	7	OCT4-SOX2-TCF-NANOG(POU,Homeobox,HMG)/mES-Oct4-ChIP-Seq(GSE11431)/Homer	ATTTGCATAACAATG	0.001	-7.656	0.0269	27	0.0578	1370.4	0.0283
25	7	WRKY11(WRKY)/col-WRKY11-DAP-Seq(GSE60143)/Homer	SCGTTGACTTTN	0.001	-7.3	0.0346	15	0.0321	582.3	0.012
25	7	SPL1(SBP)/colamp-SPL1-DAP-Seq(GSE60143)/Homer	HYGTACDTWH	0.001	-7.042	0.0424	141	0.3019	11498.2	0.2377
25	7	ZNF264(Zf)/HEK293-ZNF264.GFP-ChIP-Seq(GSE58341)/Homer	RGGGCACTAACY	0.001	-6.988	0.0425	31	0.0664	1735.6	0.0359
25	7	E2F3(E2F)/MEF-E2F3-ChIP-Seq(GSE71376)/Homer	BTKGGCGGGAAA	0.001	-6.922	0.0433	22	0.0471	1077.1	0.0223
25	8	FAR1(FAR1)/col-FAR1-DAP-Seq(GSE60143)/Homer	TKNNNYYCACGCGCY	0.0001	-9.662	0.0587	8	0.0365	295.6	0.006
25	8	Rfx5(HTH)/GM12878-Rfx5-ChIP-Seq(GSE31477)/Homer	SCCTAGCAACAG	0.0001	-9.409	0.0587	15	0.0685	1042.5	0.0212
25	8	TCFL2(HMG)/K562-TCF7L2-ChIP-Seq(GSE29196)/Homer	ACWTCAAAGG	0.001	-8.638	0.0587	9	0.0411	437.7	0.0089
25	8	COUP-TFII(NR)/Artia-Nr2f2-ChIP-Seq(GSE46497)/Homer	AGRGGTCA	0.001	-7.552	0.121	48	0.2192	6684.7	0.1361
25	8	FHY3(FAR1)/Arabidopsis-FHY3-ChIP-Seq(GSE30711)/Homer	HHCACGCGCBTN	0.001	-7.369	0.121	12	0.0548	873.1	0.0178
25	8	Chop(bZIP)/MEF-Chop-ChIP-Seq(GSE35681)/Homer	ATTGCATCAT	0.001	-6.987	0.1419	18	0.0822	1744	0.0355
29	1	Pitx1:Ebox(Homeobox,bHLH)/Hindlimb-Pitx1-ChIP-Seq(GSE41591)/Homer	YTAATTRAWWCCAGATGT	1e-07	-16.96	0	24	0.0792	1034.8	0.021
29	1	ZBTB18(Zf)/HEK293-ZBTB18.GFP-ChIP-Seq(GSE58341)/Homer	AACATCTGGA	1e-06	-14.91	0.0002	30	0.099	1703	0.0346
29	1	TGA1(bZIP)/colamp-TGA1-DAP-Seq(GSE60143)/Homer	TGACGTCAKC	1e-05	-12.07	0.0018	33	0.1089	2276.4	0.0462
29	1	Tcf21(bHLH)/ArterySmoothMuscle-Tcf21-ChIP-Seq(GSE61369)/Homer	NAACAGCTGG	0.0001	-9.874	0.0119	34	0.1122	2656.6	0.0539
29	1	TGA4(bZIP)/colamp-TGA4-DAP-Seq(GSE60143)/Homer	RTGACGTCAKCW	0.001	-9.095	0.0207	25	0.0825	1761	0.0358
29	1	Atoh1(bHLH)/Cerebellum-Atoh1-ChIP-Seq(GSE22111)/Homer	VNRVCAGCTGGY	0.001	-8.715	0.0252	39	0.1287	3421.5	0.0695
29	1	GATA4(C2C2gata)/col-GATA4-DAP-Seq(GSE60143)/Homer	DDWTYAGATCTR	0.001	-8.38	0.0302	42	0.1386	3850	0.0782
29	1	p63(p53)/Keratinocyte-p63-ChIP-Seq(GSE17611)/Homer	NNDRCATGYCYNRRCATGYH	0.001	-8.245	0.0303	18	0.0594	1126.3	0.0229
29	1	Ascl1(bHLH)/NeuralTubes-Ascl1-ChIP-Seq(GSE55840)/Homer	NNVVCAGCTGBN	0.001	-8.091	0.0314	44	0.1452	4155.9	0.0844
29	1	NeuroG2(bHLH)/Fibroblast-NeuroG2-ChIP-Seq(GSE75910)/Homer	ACCATCTGTT	0.001	-8.042	0.0314	53	0.1749	5327.4	0.1082
29	1	Atf1(bZIP)/K562-ATF1-ChIP-Seq(GSE31477)/Homer	GATGACGTCA	0.001	-8.032	0.0314	43	0.1419	4040.9	0.082
29	1	HEB(bHLH)/mES-Heb-ChIP-Seq(GSE53233)/Homer	VCAGCTGBNN	0.001	-7.667	0.036	53	0.1749	5413	0.1099
29	1	Esrrb(NR)/mES-Esrrb-ChIP-Seq(GSE11431)/Homer	KTGACCTTGA	0.001	-7.477	0.0401	34	0.1122	3026	0.0614
29	1	E2F1(E2F)/Hela-E2F1-ChIP-Seq(GSE22478)/Homer	CWGGCGGGAA	0.001	-7.079	0.0555	10	0.033	475.8	0.0097
29	2	ZBTB18(Zf)/HEK293-ZBTB18.GFP-ChIP-Seq(GSE58341)/Homer	AACATCTGGA	1e-07	-17.72	0	50	0.0835	1690	0.0348
29	2	TCP7(TCP)/col-TCP7-DAP-Seq(GSE60143)/Homer	GTGGGSCCCACHHNN	1e-07	-16.81	0	34	0.0568	944.8	0.0194
29	2	Chop(bZIP)/MEF-Chop-ChIP-Seq(GSE35681)/Homer	ATTGCATCAT	1e-06	-13.93	0.0003	54	0.0902	2147.7	0.0442
29	2	ZFX(Zf)/mES-Zfx-ChIP-Seq(GSE11431)/Homer	AGGCCTRG	1e-05	-12.88	0.0006	50	0.0835	1995.5	0.041
29	2	GATA4(C2C2gata)/col-GATA4-DAP-Seq(GSE60143)/Homer	DDWTYAGATCTR	1e-05	-12.82	0.0006	88	0.1469	4326.1	0.089
29	2	Rfx5(HTH)/GM12878-Rfx5-ChIP-Seq(GSE31477)/Homer	SCCTAGCAACAG	1e-05	-12.48	0.0006	34	0.0568	1148.6	0.0236
29	2	E2F1(E2F)/Hela-E2F1-ChIP-Seq(GSE22478)/Homer	CWGGCGGGAA	1e-05	-12.32	0.0006	18	0.0301	404.8	0.0083
29	2	Atf4(bZIP)/MEF-Atf4-ChIP-Seq(GSE35681)/Homer	MTGATGCAAT	0.0001	-9.967	0.0054	59	0.0985	2786.8	0.0573
29	2	M1BP(Zf)/S2R+-M1BP-ChIP-Seq(GSE49842)/Homer	CAGTGTGACCGT	0.0001	-9.788	0.0058	19	0.0317	537	0.011
29	2	HDG1(Homeobox)/col100-HDG1-DAP-Seq(GSE60143)/Homer	DDYAATTAATGH	0.0001	-9.582	0.0064	86	0.1436	4587.6	0.0944
29	2	MYB3R1(MYB)/col-MYB3R1-DAP-Seq(GSE60143)/Homer	WWDTDACCGTTR	0.0001	-9.33	0.0074	67	0.1119	3366	0.0692
29	2	TCP1(TCP)/col-TCP1-DAP-Seq(GSE60143)/Homer	GGGGGCCCMMCN	0.001	-9.203	0.0077	19	0.0317	562.3	0.0116
29	2	p63(p53)/Keratinocyte-p63-ChIP-Seq(GSE17611)/Homer	NNDRCATGYCYNRRCATGYH	0.001	-9.188	0.0077	31	0.0518	1187.9	0.0244
29	2	WIP5(C2H2)/colamp-WIP5-DAP-Seq(GSE60143)/Homer	TDTTCTCMAGGT	0.001	-9.091	0.0077	79	0.1319	4184.5	0.0861
29	2	Tcf21(bHLH)/ArterySmoothMuscle-Tcf21-ChIP-Seq(GSE61369)/Homer	NAACAGCTGG	0.001	-8.946	0.008	56	0.0935	2704.9	0.0556
29	2	Pitx1:Ebox(Homeobox,bHLH)/Hindlimb-Pitx1-ChIP-Seq(GSE41591)/Homer	YTAATTRAWWCCAGATGT	0.001	-8.916	0.008	30	0.0501	1150.6	0.0237
29	2	HNF1b(Homeobox)/PDAC-HNF1B-ChIP-Seq(GSE64557)/Homer	GTTAATNATTAA	0.001	-8.898	0.008	29	0.0484	1096.9	0.0226
29	2	NeuroG2(bHLH)/Fibroblast-NeuroG2-ChIP-Seq(GSE75910)/Homer	ACCATCTGTT	0.001	-8.858	0.008	102	0.1703	5786.8	0.119
29	2	ATHB18(Homeobox)/colamp-ATHB18-DAP-Seq(GSE60143)/Homer	YCAATSATTG	0.001	-8.035	0.0157	35	0.0584	1503.7	0.0309
29	2	COUP-TFII(NR)/Artia-Nr2f2-ChIP-Seq(GSE46497)/Homer	AGRGGTCA	0.001	-7.585	0.0234	112	0.187	6708.4	0.138
29	2	ETS:RUNX(ETS,Runt)/Jurkat-RUNX1-ChIP-Seq(GSE17954)/Homer	RCAGGATGTGGT	0.001	-7.153	0.0344	9	0.015	193.3	0.004
29	2	ZNF711(Zf)/SHSY5Y-ZNF711-ChIP-Seq(GSE20673)/Homer	AGGCCTAG	0.001	-6.928	0.0411	59	0.0985	3141.2	0.0646
29	3	ZBTB18(Zf)/HEK293-ZBTB18.GFP-ChIP-Seq(GSE58341)/Homer	AACATCTGGA	1e-05	-12.21	0.0046	25	0.0984	1721.1	0.0354
29	3	TCP7(TCP)/col-TCP7-DAP-Seq(GSE60143)/Homer	GTGGGSCCCACHHNN	0.0001	-10.2	0.0172	16	0.063	927.8	0.0191
29	3	Zfp281(Zf)/ES-Zfp281-ChIP-Seq(GSE81042)/Homer	CCCCTCCCCCAC	0.0001	-9.557	0.0217	10	0.0394	409	0.0084
29	3	TATA-Box(TBP)/Promoter/Homer	CCTTTTAWAGSC	0.001	-8.275	0.0587	59	0.2323	7212.4	0.1482
29	3	Esrrb(NR)/mES-Esrrb-ChIP-Seq(GSE11431)/Homer	KTGACCTTGA	0.001	-7.863	0.071	29	0.1142	2804.7	0.0576
29	3	TCP1(TCP)/col-TCP1-DAP-Seq(GSE60143)/Homer	GGGGGCCCMMCN	0.001	-7.188	0.1161	10	0.0394	553.1	0.0114
29	4	Zfp281(Zf)/ES-Zfp281-ChIP-Seq(GSE81042)/Homer	CCCCTCCCCCAC	1e-06	-15.95	0.0001	18	0.0444	466.7	0.0096
29	4	TCFL2(HMG)/K562-TCF7L2-ChIP-Seq(GSE29196)/Homer	ACWTCAAAGG	1e-05	-13.02	0.001	16	0.0395	459.8	0.0094
29	4	HDG1(Homeobox)/col100-HDG1-DAP-Seq(GSE60143)/Homer	DDYAATTAATGH	1e-05	-11.53	0.003	61	0.1506	4147.3	0.0849
29	4	Tcf3(HMG)/mES-Tcf3-ChIP-Seq(GSE11724)/Homer	ASWTCAAAGG	0.0001	-11.44	0.003	30	0.0741	1494.8	0.0306
29	4	Tcf21(bHLH)/ArterySmoothMuscle-Tcf21-ChIP-Seq(GSE61369)/Homer	NAACAGCTGG	0.0001	-10.61	0.0046	45	0.1111	2820.7	0.0577
29	4	Tcf4(HMG)/Hct116-Tcf4-ChIP-Seq(SRA012054)/Homer	ASATCAAAGGVA	0.0001	-10.47	0.0046	40	0.0988	2401.4	0.0491
29	4	ZBTB18(Zf)/HEK293-ZBTB18.GFP-ChIP-Seq(GSE58341)/Homer	AACATCTGGA	0.0001	-9.327	0.0117	31	0.0765	1762.9	0.0361
29	4	Pitx1:Ebox(Homeobox,bHLH)/Hindlimb-Pitx1-ChIP-Seq(GSE41591)/Homer	YTAATTRAWWCCAGATGT	0.001	-8.642	0.0204	22	0.0543	1103.5	0.0226
29	4	NFkB-p50,p52(RHD)/Monocyte-p50-ChIP-Chip(Schreiber_et_al.)/Homer	GGGGGAATCCCC	0.001	-8.216	0.0277	12	0.0296	423.6	0.0087
29	4	MYB96(MYB)/colamp-MYB96-DAP-Seq(GSE60143)/Homer	WGGTRGTTGG	0.001	-8.214	0.0277	53	0.1309	3889.6	0.0796
29	4	HEB(bHLH)/mES-Heb-ChIP-Seq(GSE53233)/Homer	VCAGCTGBNN	0.001	-7.929	0.0302	71	0.1753	5717.2	0.117
29	4	FAR1(FAR1)/col-FAR1-DAP-Seq(GSE60143)/Homer	TKNNNYYCACGCGCY	0.001	-7.893	0.0302	11	0.0272	376.5	0.0077
29	4	GATA4(C2C2gata)/col-GATA4-DAP-Seq(GSE60143)/Homer	DDWTYAGATCTR	0.001	-7.742	0.0308	55	0.1358	4162.9	0.0852
29	4	HSF3(HSF)/colamp-HSF3-DAP-Seq(GSE60143)/Homer	NTTCTAGAAKCTTCT	0.001	-7.422	0.0394	54	0.1333	4121.4	0.0844
29	4	HDG7(HB)/col-HDG7-DAP-Seq(GSE60143)/Homer	WGCATTTAATGC	0.001	-7.277	0.0425	22	0.0543	1223	0.025
29	4	Olig2(bHLH)/Neuron-Olig2-ChIP-Seq(GSE30882)/Homer	RCCATMTGTT	0.001	-7.044	0.0503	92	0.2272	8102.8	0.1658
29	4	Smad3(MAD)/NPC-Smad3-ChIP-Seq(GSE36673)/Homer	TWGTCTGV	0.001	-6.969	0.051	106	0.2617	9628.4	0.1971
29	5	ATHB18(Homeobox)/colamp-ATHB18-DAP-Seq(GSE60143)/Homer	YCAATSATTG	0.001	-6.931	0.9006	9	0.0989	1344.5	0.0277
29	6	Esrrb(NR)/mES-Esrrb-ChIP-Seq(GSE11431)/Homer	KTGACCTTGA	1e-08	-18.81	0	54	0.1429	2969.8	0.0609
29	6	Nur77(NR)/K562-NR4A1-ChIP-Seq(GSE31363)/Homer	TGACCTTTNCNT	1e-07	-17.68	0	29	0.0767	1109.5	0.0228
29	6	TCP7(TCP)/col-TCP7-DAP-Seq(GSE60143)/Homer	GTGGGSCCCACHHNN	1e-05	-13.29	0.0005	22	0.0582	864.4	0.0177
29	6	Pitx1:Ebox(Homeobox,bHLH)/Hindlimb-Pitx1-ChIP-Seq(GSE41591)/Homer	YTAATTRAWWCCAGATGT	1e-05	-12.96	0.0005	25	0.0661	1097.3	0.0225
29	6	Chop(bZIP)/MEF-Chop-ChIP-Seq(GSE35681)/Homer	ATTGCATCAT	1e-05	-12.52	0.0007	34	0.0899	1838.9	0.0377
29	6	COUP-TFII(NR)/Artia-Nr2f2-ChIP-Seq(GSE46497)/Homer	AGRGGTCA	1e-05	-12.06	0.0009	86	0.2275	6931.2	0.1422
29	6	M1BP(Zf)/S2R+-M1BP-ChIP-Seq(GSE49842)/Homer	CAGTGTGACCGT	0.0001	-11.45	0.0014	15	0.0397	496	0.0102
29	6	GATA12(C2C2gata)/col-GATA12-DAP-Seq(GSE60143)/Homer	YAGATCTRAW	0.0001	-10.86	0.0022	39	0.1032	2436.1	0.05
29	6	p63(p53)/Keratinocyte-p63-ChIP-Seq(GSE17611)/Homer	NNDRCATGYCYNRRCATGYH	0.0001	-9.941	0.0049	21	0.0556	999.2	0.0205
29	6	HNF1b(Homeobox)/PDAC-HNF1B-ChIP-Seq(GSE64557)/Homer	GTTAATNATTAA	0.0001	-9.259	0.0088	23	0.0608	1210.3	0.0248
29	6	PPARE(NR),DR1/3T3L1-Pparg-ChIP-Seq(GSE13511)/Homer	TGACCTTTGCCCCA	0.001	-9.069	0.0097	46	0.1217	3325.6	0.0682
29	6	Atf4(bZIP)/MEF-Atf4-ChIP-Seq(GSE35681)/Homer	MTGATGCAAT	0.001	-8.469	0.0161	36	0.0952	2445.9	0.0502
29	6	WRKY43(WRKY)/colamp-WRKY43-DAP-Seq(GSE60143)/Homer	NCGTTGACTTTT	0.001	-8.463	0.0161	30	0.0794	1891.3	0.0388
29	6	WRKY26(WRKY)/colamp-WRKY26-DAP-Seq(GSE60143)/Homer	CGTTGACTWDKN	0.001	-7.943	0.0234	36	0.0952	2515.7	0.0516
29	6	THRb(NR)/Liver-NR1A2-ChIP-Seq(GSE52613)/Homer	TRAGGTCA	0.001	-7.779	0.0257	143	0.3783	14470.8	0.2969
29	6	FAR1(FAR1)/col-FAR1-DAP-Seq(GSE60143)/Homer	TKNNNYYCACGCGCY	0.001	-7.71	0.0258	10	0.0265	346.6	0.0071
29	6	Tcf3(HMG)/mES-Tcf3-ChIP-Seq(GSE11724)/Homer	ASWTCAAAGG	0.001	-7.595	0.0273	24	0.0635	1450.5	0.0298
29	6	HDG1(Homeobox)/col100-HDG1-DAP-Seq(GSE60143)/Homer	DDYAATTAATGH	0.001	-7.351	0.0329	58	0.1534	4849.1	0.0995
29	6	Tcfcp2l1(CP2)/mES-Tcfcp2l1-ChIP-Seq(GSE11431)/Homer	NRAACCRGTTYRAACCRGYT	0.001	-7.326	0.0329	11	0.0291	431.1	0.0088
29	6	WRKY14(WRKY)/colamp-WRKY14-DAP-Seq(GSE60143)/Homer	NCGTTGACTTTN	0.001	-7.128	0.037	35	0.0926	2534.3	0.052
29	6	E2F1(E2F)/Hela-E2F1-ChIP-Seq(GSE22478)/Homer	CWGGCGGGAA	0.001	-6.945	0.0423	11	0.0291	452.7	0.0093
29	7	TCP7(TCP)/col-TCP7-DAP-Seq(GSE60143)/Homer	GTGGGSCCCACHHNN	1e-08	-19.3	0	31	0.064	893	0.0185
29	7	E2F1(E2F)/Hela-E2F1-ChIP-Seq(GSE22478)/Homer	CWGGCGGGAA	1e-06	-15.95	0.0001	18	0.0372	384.3	0.008
29	7	TATA-Box(TBP)/Promoter/Homer	CCTTTTAWAGSC	1e-06	-15.25	0.0001	113	0.2335	7057	0.1462
29	7	TCFL2(HMG)/K562-TCF7L2-ChIP-Seq(GSE29196)/Homer	ACWTCAAAGG	1e-05	-12.27	0.0011	16	0.0331	402.8	0.0083
29	7	CArG(MADS)/PUER-Srf-ChIP-Seq(Sullivan_et_al.)/Homer	CCATATATGGNM	0.0001	-10.66	0.0043	43	0.0888	2172.2	0.045
29	7	NeuroG2(bHLH)/Fibroblast-NeuroG2-ChIP-Seq(GSE75910)/Homer	ACCATCTGTT	0.0001	-10.46	0.0044	79	0.1632	4963	0.1028
29	7	GATA4(C2C2gata)/col-GATA4-DAP-Seq(GSE60143)/Homer	DDWTYAGATCTR	0.0001	-9.964	0.0062	62	0.1281	3675.7	0.0762
29	7	Chop(bZIP)/MEF-Chop-ChIP-Seq(GSE35681)/Homer	ATTGCATCAT	0.0001	-9.358	0.0099	36	0.0744	1796.2	0.0372
29	7	Pitx1:Ebox(Homeobox,bHLH)/Hindlimb-Pitx1-ChIP-Seq(GSE41591)/Homer	YTAATTRAWWCCAGATGT	0.001	-9.173	0.0106	26	0.0537	1130.3	0.0234
29	7	M1BP(Zf)/S2R+-M1BP-ChIP-Seq(GSE49842)/Homer	CAGTGTGACCGT	0.001	-8.318	0.0225	15	0.031	507.2	0.0105
29	7	TCP1(TCP)/col-TCP1-DAP-Seq(GSE60143)/Homer	GGGGGCCCMMCN	0.001	-7.85	0.0327	16	0.0331	589.1	0.0122
29	7	Trl(Zf)/S2-GAGAfactor-ChIP-Seq(GSE40646)/Homer	RGAGAGAG	0.001	-7.81	0.0327	139	0.2872	10675.8	0.2212
29	7	GATA12(C2C2gata)/col-GATA12-DAP-Seq(GSE60143)/Homer	YAGATCTRAW	0.001	-7.5	0.0392	40	0.0826	2285.6	0.0474
29	7	MYB27(MYB)/colamp-MYB27-DAP-Seq(GSE60143)/Homer	TACCTAACWT	0.001	-7.411	0.0398	25	0.0517	1201.6	0.0249
29	7	PPARE(NR),DR1/3T3L1-Pparg-ChIP-Seq(GSE13511)/Homer	TGACCTTTGCCCCA	0.001	-7.203	0.0458	50	0.1033	3104.1	0.0643
29	7	Ascl1(bHLH)/NeuralTubes-Ascl1-ChIP-Seq(GSE55840)/Homer	NNVVCAGCTGBN	0.001	-7.161	0.0458	58	0.1198	3756.2	0.0778
29	7	AGL63(MADS)/col-AGL63-DAP-Seq(GSE60143)/Homer	TTCCAAWWWTGG	0.001	-7.043	0.0474	74	0.1529	5109.5	0.1059
29	7	NFkB-p50,p52(RHD)/Monocyte-p50-ChIP-Chip(Schreiber_et_al.)/Homer	GGGGGAATCCCC	0.001	-6.989	0.0474	11	0.0227	347.2	0.0072
29	7	GATA20(C2C2gata)/colamp-GATA20-DAP-Seq(GSE60143)/Homer	TNGATCNDNM	0.001	-6.936	0.0474	154	0.3182	12282.1	0.2545
29	8	HDG7(HB)/col-HDG7-DAP-Seq(GSE60143)/Homer	WGCATTTAATGC	0.0001	-9.577	0.0639	18	0.0818	1386	0.0284
29	8	Pitx1:Ebox(Homeobox,bHLH)/Hindlimb-Pitx1-ChIP-Seq(GSE41591)/Homer	YTAATTRAWWCCAGATGT	0.001	-8.505	0.0933	15	0.0682	1119.5	0.023
29	8	FAR1(FAR1)/col-FAR1-DAP-Seq(GSE60143)/Homer	TKNNNYYCACGCGCY	0.001	-8.419	0.0933	8	0.0364	350.7	0.0072
29	8	Nr5a2(NR)/Pancreas-LRH1-ChIP-Seq(GSE34295)/Homer	BTCAAGGTCA	0.001	-8.301	0.0933	23	0.1045	2250.8	0.0462
29	8	Tal1	CATCTG	0.001	-8.259	0.0933	46	0.2091	6042.3	0.124
29	8	Rfx5(HTH)/GM12878-Rfx5-ChIP-Seq(GSE31477)/Homer	SCCTAGCAACAG	0.001	-7.854	0.0933	14	0.0636	1062.8	0.0218
29	8	TCFL2(HMG)/K562-TCF7L2-ChIP-Seq(GSE29196)/Homer	ACWTCAAAGG	0.001	-7.837	0.0933	9	0.0409	482.5	0.0099
29	8	NFkB-p50,p52(RHD)/Monocyte-p50-ChIP-Chip(Schreiber_et_al.)/Homer	GGGGGAATCCCC	0.001	-7.824	0.0933	8	0.0364	383.6	0.0079
29	8	COUP-TFII(NR)/Artia-Nr2f2-ChIP-Seq(GSE46497)/Homer	AGRGGTCA	0.001	-7.782	0.0933	49	0.2227	6713.4	0.1378
29	8	Nur77(NR)/K562-NR4A1-ChIP-Seq(GSE31363)/Homer	TGACCTTTNCNT	0.001	-7.726	0.0933	14	0.0636	1076.8	0.0221
29	8	Ascl1(bHLH)/NeuralTubes-Ascl1-ChIP-Seq(GSE55840)/Homer	NNVVCAGCTGBN	0.001	-7.643	0.0933	34	0.1545	4125.1	0.0847
29	8	Reverb(NR),DR2/RAW-Reverba.biotin-ChIP-Seq(GSE45914)/Homer	GTRGGTCASTGGGTCA	0.001	-7.193	0.0933	6	0.0273	234.3	0.0048
29	8	MYB27(MYB)/colamp-MYB27-DAP-Seq(GSE60143)/Homer	TACCTAACWT	0.001	-7.135	0.0933	14	0.0636	1144.9	0.0235
